# Supplementary material for: 4-Hydroxyphenylpyruvate Dioxygenase-Like predicts the prognosis and the immunotherapy response of cancers: a pan-cancer analysis
Source: Aging (Albany NY). 2024 Mar 6;16(5):4327–47. doi: 10.18632/aging.205591 (PMC10968709; doi:10.18632/aging.205591)
Supplement: Supplementary Table 1 [file aging-16-205591-s001.xls]

## Sheet: ACC
Supplementary Table 1. Differentially expressed genes (DEGs) between the low-HPDL subgroup and the high-HPDL subgroup in Pancancer.
	fc	log2fc	pvalue	padj
HPDL	5.34391	2.4179	8.52683e-15	4.82636e-10
PLPP2	4.59571	2.20029	0.000974109	0.285098
AL365357.1	4.2938	2.10226	0.00416439	0.400809
CILP2	4.13453	2.04772	0.00107257	0.296608
NPTX1	3.88607	1.95831	0.0261867	0.584083
PNMA6A	3.77161	1.91518	5.82975e-05	0.164988
LAMP5	3.38501	1.75916	0.0151517	0.521363
CTHRC1	3.20267	1.67928	0.000449089	0.250455
SNORD113.3	3.0697	1.6181	0.0173098	0.536097
C10orf82	3.06311	1.615	0.0307732	0.608404
CALN1	3.05821	1.61269	0.0140987	0.515182
KIF26A	3.02874	1.59872	0.0015231	0.312541
AC009041.2	2.96867	1.56982	0.019083	0.545661
FSCN1	2.8665	1.51929	0.00811161	0.47033
ASPHD1	2.84231	1.50706	0.000756182	0.272671
C1QL4	2.83305	1.50236	0.0067312	0.445876
CDC20	2.80831	1.4897	0.00264356	0.357405
ICAM5	2.77822	1.47416	0.0125901	0.504127
SLC9A3.AS1	2.77374	1.47183	0.00102898	0.289682
SOX8	2.76696	1.4683	0.00939612	0.484489
MMP17	2.76219	1.46581	0.0146741	0.518653
CERS1	2.75823	1.46374	0.00586189	0.437378
SPHK1	2.75223	1.4606	0.000441054	0.250455
NEK6	2.72569	1.44662	0.00368986	0.390635
MFAP2	2.72449	1.44599	0.00189687	0.323434
POMC	2.71666	1.44184	0.0263005	0.584591
CDH11	2.69697	1.43134	0.0204095	0.557043
UBE2C	2.688	1.42653	0.0053952	0.428301
C5orf38	2.67661	1.42041	0.0021995	0.342464
FOXL2	2.66843	1.41599	0.0195728	0.550627
HMX3	2.66433	1.41377	0.0114824	0.497257
FBN2	2.61855	1.38877	0.00627303	0.439896
TMEM121	2.61824	1.3886	0.000941975	0.284047
HES4	2.61651	1.38765	0.000419295	0.250455
PNMA3	2.6038	1.38062	0.0301473	0.604168
NXPH4	2.59556	1.37604	0.00174804	0.323434
AL049870.3	2.5852	1.37028	0.00147637	0.312328
NMRK2	2.57933	1.36699	0.0342832	0.621356
DLGAP5	2.57296	1.36343	0.00201055	0.333727
FUOM	2.5586	1.35535	0.00257841	0.357405
MT1E	2.54268	1.34635	0.0387343	0.638995
IRX2	2.54152	1.34569	0.00250772	0.353547
MKI67	2.53154	1.34001	0.00288597	0.367639
ROR2	2.51699	1.3317	0.0145836	0.518653
STMN1	2.50881	1.327	3.16217e-05	0.149027
RFLNB	2.49631	1.3198	0.000121109	0.193215
LRFN4	2.47784	1.30908	0.00084758	0.277358
AC112907.2	2.46572	1.30201	8.13234e-05	0.190245
CDK1	2.46345	1.30068	0.00372738	0.390698
KIF20A	2.44495	1.2898	0.00437932	0.404986
NPNT	2.43361	1.2831	0.00652898	0.443009
MELK	2.41894	1.27438	0.00258795	0.357405
SLC7A5	2.41045	1.2693	0.0150091	0.519962
CERCAM	2.40695	1.26721	0.0053513	0.426612
GPR153	2.39907	1.26248	0.0172144	0.536097
NID2	2.3942	1.25954	0.00129049	0.310451
LRRC4B	2.38804	1.25583	0.00119231	0.30542
KREMEN2	2.37858	1.2501	0.00530093	0.426612
SULF2	2.3703	1.24507	0.00348929	0.384719
CENPF	2.36517	1.24194	0.00226476	0.343674
MYBL2	2.35532	1.23592	0.0181569	0.53925
TMEM54	2.33946	1.22617	0.00247575	0.352092
S1PR3	2.33678	1.22452	0.0131704	0.509898
SERPINE2	2.32839	1.21933	0.0375161	0.63518
HMX2	2.326	1.21785	0.00492595	0.416769
ATE1.AS1	2.32597	1.21783	0.0021496	0.340817
COL5A1	2.3178	1.21276	0.00434582	0.404986
FNDC10	2.31718	1.21237	0.00442177	0.404986
SNORD60	2.31706	1.2123	0.000892455	0.278033
PRRX1	2.29588	1.19905	0.0257292	0.581861
CDCA7	2.29059	1.19572	0.0091025	0.481064
SLC9A3	2.28479	1.19206	0.00336778	0.379802
KIF2C	2.27635	1.18672	0.00338394	0.379802
AC019171.1	2.27472	1.18569	0.00180461	0.323434
FBXL21P	2.27421	1.18537	0.0160686	0.52695
PRR16	2.27181	1.18384	0.00428128	0.402237
LHX2	2.26877	1.18191	0.000858349	0.277358
RRM2	2.26686	1.1807	0.0248942	0.576742
RPS14P8	2.26417	1.17898	0.00534206	0.426612
CPNE7	2.26263	1.178	0.0103604	0.488681
AURKB	2.24516	1.16682	0.00827352	0.47044
SEPT5	2.24286	1.16534	0.0015414	0.312711
NR4A2	2.21596	1.14793	0.0137282	0.5144
ACHE	2.21577	1.14781	0.0147597	0.518729
ANGPTL4	2.21437	1.1469	0.030803	0.608556
PYCR1	2.21254	1.1457	0.00261364	0.357405
MARVELD1	2.21234	1.14557	0.00578343	0.437378
PBK	2.20797	1.14272	0.027394	0.590463
TBX2.AS1	2.2062	1.14156	0.0164519	0.532729
EFNA2	2.20471	1.14059	0.0325795	0.612552
RAMP1	2.20115	1.13826	0.0125128	0.504127
WNK2	2.19488	1.13414	0.00500412	0.418998
AC026774.1	2.19	1.13093	0.0147723	0.518729
PRXL2B	2.18891	1.13021	0.000463694	0.250455
HJURP	2.18539	1.12789	0.00647766	0.443009
RNA5SP283	2.18369	1.12677	0.00400196	0.398597
AL161752.1	2.17796	1.12298	0.00147069	0.312328
TBX1	2.17746	1.12265	0.00700638	0.448619
HAGHL	2.17677	1.12219	0.0114853	0.497257
CDT1	2.16443	1.11399	0.0115261	0.497257
PTTG1	2.1608	1.11156	0.00945511	0.484489
STEAP1	2.15718	1.10914	0.0223129	0.564322
CEP55	2.15703	1.10905	0.0113951	0.496867
AL359399.1	2.15502	1.1077	0.00561104	0.432939
SV2C	2.15425	1.10719	0.0117443	0.498566
TOP2A	2.15295	1.10632	0.01933	0.547851
FAT1	2.15256	1.10605	0.0213864	0.561249
TROAP	2.15247	1.10599	0.0137174	0.5144
KIF11	2.15125	1.10517	0.00166385	0.321036
RHPN2	2.14681	1.1022	0.00019496	0.204354
PLK1	2.14519	1.10111	0.00764515	0.4591
CDKN3	2.14417	1.10042	0.00683399	0.44677
IL1RL2	2.13475	1.09407	0.00170119	0.322278
FOLH1	2.13446	1.09387	0.0143474	0.517584
DUSP2	2.13426	1.09373	0.0278604	0.59248
EMILIN3	2.13296	1.09285	0.0256395	0.58102
TBX2	2.13178	1.09206	0.00446784	0.405803
CCNB2	2.12303	1.08612	0.0283207	0.596136
CENPV	2.11987	1.08398	0.0014179	0.312328
MMD2	2.11901	1.08339	0.0263389	0.584591
LMNB1	2.11818	1.08282	0.00445329	0.405803
CDCA8	2.10761	1.07561	0.0038414	0.393333
VIM	2.10516	1.07393	0.00487562	0.41676
HIST3H2A	2.09888	1.06962	0.00798085	0.466262
NAT8L	2.09483	1.06683	0.0420876	0.644895
ZWINT	2.09035	1.06374	0.00189416	0.323434
CCDC3	2.08384	1.05924	0.00170528	0.322278
AC015468.3	2.08187	1.05788	0.0446791	0.652963
TPTEP1	2.07847	1.05552	0.029424	0.600164
PLEKHG2	2.07656	1.0542	7.00397e-05	0.1802
GRIN2D	2.07585	1.0537	0.0165886	0.534403
PGGHG	2.06999	1.04962	0.00357288	0.385204
EEF1GP1	2.06393	1.04539	0.00122088	0.30542
JAKMIP1	2.06301	1.04475	0.0424223	0.645267
LTBP1	2.06288	1.04466	0.0123453	0.503159
AC011450.1	2.06257	1.04444	0.00141643	0.312328
MMP14	2.05896	1.04191	0.0338881	0.619263
SLC2A10	2.05569	1.03962	0.00245573	0.351008
KLHL17	2.05545	1.03945	0.000476356	0.250455
RNA5SP18	2.05387	1.03835	0.00823919	0.47044
RECQL4	2.04586	1.03271	0.00530697	0.426612
FBXO17	2.04295	1.03066	0.0167347	0.534547
NUF2	2.04158	1.02968	0.0139192	0.5144
ZNF738	2.04125	1.02945	0.00360022	0.386678
CACNA1G	2.03958	1.02827	0.00606092	0.437378
EFNB3	2.03949	1.02821	0.0137785	0.5144
PTK7	2.03893	1.02781	0.0366015	0.631637
RGS7	2.03571	1.02553	0.0179959	0.537807
SPC24	2.03259	1.02332	0.015834	0.525537
NCAPG2	2.03067	1.02196	0.000297374	0.244817
ST7.AS1	2.02886	1.02067	3.97701e-05	0.149027
AL731566.2	2.0281	1.02013	0.00901534	0.480089
GSTM3	2.02452	1.01758	0.0180216	0.538006
RIBC2	2.0201	1.01442	0.00192568	0.323434
CNTFR	2.0185	1.01328	0.035424	0.626123
DLL1	2.0183	1.01314	0.00151979	0.312541
PKMYT1	2.01391	1.01	0.0147616	0.518729
NAT14	2.01103	1.00793	0.00655553	0.443009
EBF4	2.01092	1.00786	0.0149111	0.519371
FAM20C	2.00685	1.00493	0.0404981	0.643064
EHD2	2.00262	1.00189	0.00649811	0.443009
B3GNT9	2.00029	1.00021	0.0243539	0.575739
AC004080.1	1.9992	0.999426	0.0149351	0.51958
CLIP3	1.99902	0.99929	0.0175785	0.536112
C14orf132	1.99629	0.997322	0.000865353	0.277358
AL691432.2	1.99613	0.997206	0.000147404	0.193215
FOXD3.AS1	1.99505	0.996428	0.0497445	0.668509
PSRC1	1.99068	0.993261	0.00185855	0.323434
MXRA8	1.99041	0.993069	0.0348668	0.622762
AC120498.8	1.99038	0.993041	0.0409386	0.6434
SHCBP1	1.98965	0.992515	0.017338	0.536097
DEPDC1	1.98629	0.990074	0.00474479	0.415707
PDZD4	1.98431	0.988638	0.02885	0.59885
KCTD15	1.98408	0.98847	0.00111075	0.302263
GPX7	1.983	0.987681	0.0299185	0.60371
BOK	1.98255	0.987357	0.0479501	0.661646
CENPA	1.9809	0.986158	0.020895	0.560254
UHRF1	1.98018	0.98563	0.00612554	0.437614
ADAM12	1.97867	0.984531	0.00144721	0.312328
CCDC78	1.97626	0.982774	0.00716757	0.450302
ASPM	1.97492	0.981791	0.00771036	0.4591
SLC12A8	1.96916	0.977579	0.00409811	0.398597
EFNA5	1.96818	0.976861	0.0200215	0.554866
HENMT1	1.96634	0.975513	0.00946415	0.484489
NECAB2	1.96419	0.973932	0.0383184	0.6381
FN1	1.96345	0.973393	0.0315151	0.61138
DBN1	1.95785	0.96927	0.016149	0.527448
AL591846.1	1.95712	0.968734	0.00462159	0.41218
SEPT3	1.95626	0.968097	0.00058288	0.263531
PIEZO1	1.95461	0.966882	0.00179155	0.323434
MAPK12	1.95251	0.965329	0.00643125	0.443009
GTSE1	1.94944	0.963057	0.00684339	0.44677
ZFP92	1.94917	0.962858	0.0182643	0.540271
TUBB2A	1.9474	0.961547	0.0235973	0.570061
NFIX	1.94672	0.961046	0.00821197	0.47044
H1F0	1.94302	0.958297	0.0374371	0.634626
KIF4A	1.94298	0.958273	0.00886607	0.478853
PFKP	1.9401	0.956129	0.0290551	0.598926
CAMK1D	1.93996	0.956026	0.0186061	0.541641
FAM83D	1.93913	0.95541	0.0114293	0.496867
AL596094.1	1.93666	0.953573	0.000191353	0.204354
GPR3	1.93552	0.952723	0.00129493	0.310451
JAG2	1.93323	0.951012	0.000717059	0.272671
BIRC5	1.93236	0.950365	0.048191	0.662266
FOXL1	1.92968	0.948363	0.0196313	0.550902
NEK2	1.92882	0.947718	0.017257	0.536097
AC004854.2	1.92801	0.947112	0.0234831	0.570061
EID2B	1.92689	0.946271	0.000204495	0.210452
ZNF239	1.92509	0.944925	0.00260046	0.357405
TUBB6	1.92196	0.942575	0.00480852	0.415707
DIPK1B	1.91983	0.940981	0.0338487	0.619231
AGRN	1.91721	0.939008	0.00597855	0.437378
DLK2	1.91711	0.938935	0.00518789	0.424956
KIF14	1.91688	0.938764	0.00144343	0.312328
TWIST2	1.91425	0.936778	0.045726	0.654282
RPL35P5	1.91418	0.93673	0.0147107	0.518729
LGALS3	1.91201	0.935089	0.0419947	0.644358
AL513165.1	1.90856	0.932481	0.018598	0.541641
KAZALD1	1.90748	0.93167	0.0142244	0.515731
ZNF783	1.90743	0.931634	5.11562e-06	0.106203
KHDRBS2	1.9069	0.931231	0.0397637	0.641622
TLX3	1.90611	0.930628	0.0210279	0.560664
MAN1B1.DT	1.90558	0.930233	0.00079272	0.273522
AL359091.5	1.90409	0.929102	0.000792151	0.273522
HELLS	1.90247	0.927876	0.00187144	0.323434
TK1	1.90174	0.927323	0.0474679	0.661269
NCAPG	1.90139	0.927055	0.0184622	0.540449
PDPR	1.90064	0.926483	1.8585e-05	0.149027
FAM84A	1.89618	0.923094	0.0115622	0.497678
CCNB1	1.89603	0.922984	0.00522493	0.426612
C2CD4C	1.89574	0.92276	0.0167443	0.534552
KCNK9	1.89322	0.920844	0.0366249	0.631637
AL592494.2	1.89261	0.920374	0.0142554	0.515909
PDE3A	1.89179	0.919752	0.000780192	0.272671
KDELR3	1.88921	0.917779	0.0142076	0.515731
BTBD6	1.88904	0.917651	0.0022972	0.344581
TPX2	1.88645	0.915673	0.0131989	0.510651
SYNGR3	1.88453	0.914206	0.0310043	0.609978
CCNA2	1.88344	0.913369	0.025188	0.577203
HMGB2	1.88301	0.913044	0.00152952	0.312541
AC107375.1	1.88263	0.912749	0.00012838	0.193215
CDKN2A	1.88245	0.912614	0.0301872	0.604168
AC022144.1	1.88107	0.911552	0.00366821	0.390278
KIRREL1	1.88105	0.911536	0.00339004	0.379802
AC079949.2	1.88091	0.911428	0.0165062	0.533345
MT1H	1.87979	0.91057	0.0373702	0.634441
MLF1	1.87824	0.909383	0.000119753	0.193215
AGMAT	1.87744	0.90877	0.00906606	0.480326
ZEB1.AS1	1.8769	0.908348	5.74639e-05	0.164988
AC092903.1	1.87665	0.908163	0.0106159	0.489752
RPS3AP5	1.8765	0.908044	0.00572063	0.437378
LINC00235	1.87602	0.907675	0.000260763	0.234281
GAS5	1.87475	0.9067	0.00317935	0.371842
AC083880.1	1.87348	0.905721	0.000147741	0.193215
CDC7	1.87252	0.904977	0.00192249	0.323434
AL356417.2	1.8721	0.904657	0.00096706	0.285098
AC099850.3	1.87209	0.90465	0.0278531	0.59248
NDC80	1.87184	0.904458	0.0147165	0.518729
NETO2	1.87171	0.904356	0.0288464	0.59885
TOX2	1.87109	0.903875	0.0304625	0.606438
LINC01560	1.86919	0.902416	0.000225423	0.219989
TPPP3	1.86864	0.901986	0.00478839	0.415707
ESM1	1.8669	0.900642	0.015366	0.522614
MCM10	1.86055	0.895731	0.00527582	0.426612
PNMA2	1.85978	0.895134	0.0228697	0.567751
KIFC1	1.85921	0.89469	0.0351027	0.625003
MIR4477B	1.85553	0.891829	0.031888	0.61138
TCF3	1.85485	0.8913	0.00042535	0.250455
DPY19L2P2	1.85243	0.889417	0.000260119	0.234281
AC092535.4	1.85158	0.888757	0.0120316	0.500763
TGFBR3L	1.85154	0.888726	0.0160599	0.52695
AC009570.1	1.85029	0.887752	0.00562153	0.432939
NOTCH3	1.84963	0.88724	0.00804667	0.468578
MIMT1	1.84953	0.887159	0.0246145	0.575739
AC073343.1	1.84913	0.886846	0.000650719	0.272671
AQP5	1.8483	0.886196	0.00560901	0.432939
AL355574.1	1.84312	0.882147	0.000372423	0.250455
TMEM145	1.84189	0.88119	0.0445158	0.65226
DUSP5	1.84152	0.880899	0.0139328	0.5144
BUB1	1.84078	0.880314	0.0139915	0.5144
METRNL	1.83967	0.879446	0.0336317	0.617662
CSRP2	1.83704	0.877386	0.0492171	0.667734
MIR4482	1.8336	0.874677	0.0118897	0.499699
B4GALT2	1.83278	0.874031	0.00055119	0.260073
UBE2S	1.83084	0.872505	0.00405021	0.398597
CENPM	1.82811	0.870356	0.0229521	0.567819
RMI2	1.82771	0.870039	0.017361	0.536097
FOXK1	1.82701	0.869483	0.000101662	0.193215
SLC16A11	1.82629	0.868917	0.00568291	0.43527
ZC3HAV1L	1.82515	0.868014	0.00315188	0.371512
HIST1H2AM	1.82368	0.866852	0.0161197	0.527178
RPS2P5	1.82347	0.866683	0.000560562	0.260073
AL122010.1	1.82202	0.865538	3.26776e-05	0.149027
FJX1	1.81949	0.863534	0.00439765	0.404986
SNORD36C	1.81908	0.863212	0.0144058	0.518043
CDCA2	1.81603	0.860786	0.0100658	0.486521
LRRC3	1.81453	0.859595	0.00638962	0.443009
GABRD	1.80905	0.85523	0.0114224	0.496867
ARL10	1.80883	0.855054	0.000455103	0.250455
PRRG3	1.80867	0.854931	0.0416209	0.644072
CTNND2	1.80807	0.85445	0.0122186	0.503159
MEX3A	1.80722	0.853772	0.00496408	0.41866
AL050341.2	1.80665	0.853314	7.33606e-06	0.106203
TGFB1I1	1.80509	0.852074	0.0178771	0.537585
RCC1	1.80198	0.849584	0.000165838	0.193215
SNHG1	1.80119	0.848947	0.000313522	0.244817
SAPCD2	1.80098	0.848785	0.0110062	0.490461
MBOAT2	1.80085	0.84868	0.00131658	0.310451
SLC16A8	1.79939	0.847504	0.0139668	0.5144
ZNF22	1.7987	0.846958	0.0296938	0.601129
IQGAP3	1.79841	0.846725	0.0367946	0.631714
GJC1	1.79688	0.845491	0.000998182	0.286797
ZNF114	1.79599	0.844777	0.0138334	0.5144
AC007541.1	1.79448	0.843564	0.000691352	0.272671
AC079949.1	1.79367	0.842913	0.0104285	0.489446
COL15A1	1.79278	0.842195	0.0242249	0.575651
GFRA3	1.79236	0.841864	0.0177879	0.536873
BCL11A	1.7889	0.83907	0.00987775	0.484489
HIST1H2BO	1.7886	0.838833	0.0123143	0.503159
DACT1	1.78724	0.837732	0.0244435	0.575739
FNDC1	1.78586	0.836621	0.00237738	0.345993
EZH2	1.78345	0.834672	0.00509254	0.421811
PRTFDC1	1.78086	0.832571	0.0142105	0.515731
TRIM7	1.77937	0.831363	0.00279372	0.361027
HAPLN1	1.77663	0.829147	0.000710638	0.272671
RAD54L	1.77605	0.828672	0.00798219	0.466262
CDC45	1.77599	0.828625	0.0369278	0.632515
NBL1	1.77323	0.826378	0.0495757	0.668509
PCLAF	1.77321	0.826366	0.049422	0.668509
ILF3.DT	1.77313	0.826295	0.00369545	0.390635
MHENCR	1.7731	0.826272	0.00113381	0.30542
SLC6A16	1.77249	0.825774	0.00332365	0.377004
SCX	1.77069	0.824313	0.0210916	0.560946
BUB3	1.77041	0.824087	0.000598166	0.263531
FOXM1	1.76968	0.823486	0.0270059	0.586862
LINC01096	1.76716	0.821432	0.0297155	0.601129
AL138976.2	1.76317	0.818169	0.00341527	0.380533
CHTF18	1.76181	0.817062	0.00289244	0.367639
SMC1B	1.76147	0.81678	0.00304011	0.371512
SNHG7	1.76052	0.816005	0.0104117	0.489202
AC136475.2	1.7604	0.815903	0.0126587	0.504127
AC090114.2	1.75791	0.813864	0.000234755	0.225213
AL162231.2	1.75712	0.813216	0.0202771	0.557043
SPC25	1.75621	0.812468	0.0454571	0.654282
PRR7	1.7555	0.811883	0.0409089	0.6434
RYR1	1.7547	0.811222	0.00700437	0.448619
CKAP2L	1.75382	0.810503	0.0354149	0.626123
CDCA3	1.75277	0.809641	0.0389494	0.639708
ACTN1	1.75205	0.809047	0.00718732	0.450302
TACC3	1.74959	0.80702	0.0154901	0.524071
PDIA2	1.74922	0.806713	0.0150886	0.521076
CDCA5	1.74794	0.805657	0.0378462	0.637
CGREF1	1.74774	0.805489	0.0214856	0.561324
DLGAP3	1.74686	0.804763	0.0477266	0.661533
RPS2P46	1.7465	0.804464	0.000687045	0.272671
BANF1P2	1.74568	0.803792	0.00755118	0.455663
MT2A	1.7434	0.801904	0.0269888	0.586862
AC234582.1	1.74315	0.8017	0.000750458	0.272671
AL031716.1	1.74252	0.801177	0.00146204	0.312328
AC040977.1	1.74224	0.800945	0.00905544	0.480326
PAQR4	1.73973	0.798862	0.0101831	0.487427
TMEM30B	1.73972	0.798852	0.0272079	0.589369
AC009093.4	1.73763	0.797124	0.0219994	0.563735
DNAJB5	1.73638	0.796087	0.000396598	0.250455
AC012313.1	1.73528	0.795171	0.000343625	0.250455
DTL	1.73528	0.795167	0.0341448	0.621145
ASIC1	1.73491	0.794857	0.00677804	0.446105
TGIF2	1.73398	0.79409	0.0138872	0.5144
GAL	1.7339	0.794019	0.0470912	0.659863
CMTM3	1.73319	0.793429	0.0314054	0.611357
H1FX	1.73277	0.793082	0.00598991	0.437378
LINC01006	1.7323	0.79269	0.00267018	0.357405
RPS16	1.73184	0.792304	0.00016602	0.193215
QRICH2	1.72977	0.790583	0.0107008	0.489752
TIGD1	1.72945	0.79031	0.0022583	0.343664
AL445645.1	1.729	0.789934	0.0087	0.475849
DRD4	1.72833	0.789377	0.0351608	0.625409
AC069544.1	1.7274	0.7886	0.00101579	0.287478
ZNF581	1.72717	0.788414	0.000928107	0.283024
SNHG3	1.72565	0.787143	0.00221713	0.342464
MAPK15	1.72433	0.786034	0.0144812	0.518199
AP002387.2	1.72401	0.78577	0.0151857	0.521565
BX322562.1	1.72386	0.785641	0.0279698	0.593606
CLIP2	1.72378	0.785572	0.00413508	0.400092
ADAMTS9	1.7229	0.784837	0.0029977	0.369664
SNORD116.4	1.72151	0.783673	0.020445	0.557043
NSUN7	1.72121	0.783427	0.0100377	0.486521
SLC25A29	1.72099	0.78324	0.0055099	0.430252
TMEM225B	1.72055	0.782869	0.0221763	0.563735
AP002956.1	1.72009	0.782484	0.0101391	0.486521
DLL3	1.71915	0.781698	0.0144834	0.518199
PXDN	1.71811	0.780826	0.0135182	0.5144
AC090517.2	1.71789	0.780636	0.00025349	0.234281
ASH1L.AS1	1.71666	0.779606	0.00131009	0.310451
AC011462.1	1.7156	0.77871	0.0292397	0.599746
FAM57A	1.71378	0.777178	0.00727848	0.450302
MELTF.AS1	1.71368	0.7771	0.00447371	0.405803
FZD9	1.71149	0.775251	0.0306402	0.60661
AC104521.1	1.71057	0.774475	0.00736774	0.453098
DACT3	1.70953	0.773598	0.012534	0.504127
STIL	1.70841	0.772651	0.000698436	0.272671
MIR339	1.70802	0.772325	0.0168526	0.535015
OLFML2A	1.70801	0.772313	0.031807	0.61138
MYC	1.70761	0.77198	0.0433394	0.649495
HIST1H3D	1.70741	0.771813	0.0252132	0.577548
MXD3	1.70463	0.769457	0.0111013	0.491636
CA2	1.7043	0.769177	0.0290149	0.59885
DUX4L50	1.70363	0.768616	0.00186628	0.323434
ZNF85	1.70099	0.766378	0.0130159	0.508433
AC008608.2	1.70099	0.766372	0.00385335	0.393333
POLR1E	1.70097	0.766361	0.00164603	0.321036
SYCE2	1.70094	0.766329	0.00742643	0.453163
SH3PXD2A	1.69888	0.764582	0.00374831	0.392167
AC027031.2	1.69848	0.764244	0.0300435	0.603748
AC091849.1	1.6983	0.764088	0.0164131	0.532729
PRKAR1B	1.69756	0.763463	0.00790981	0.465542
WDHD1	1.69693	0.762927	0.00039033	0.250455
BRSK1	1.69686	0.762864	0.0357545	0.627196
ZNF532	1.69653	0.76259	0.00505162	0.421012
SALL4	1.69575	0.761927	0.00973069	0.484489
TUSC1	1.69543	0.761654	0.00852413	0.473249
SIX1	1.69298	0.759566	0.0103074	0.488327
CRISPLD1	1.69286	0.759459	0.00663297	0.445263
AP000344.1	1.69108	0.757949	0.00392354	0.397281
C6orf48	1.69031	0.757292	0.00499267	0.41866
MTSS1L	1.68961	0.756688	0.00117117	0.30542
PBX4	1.68626	0.753824	0.00533203	0.426612
DNAJC9	1.68614	0.753728	0.000977157	0.285098
PFKFB3	1.68567	0.75332	0.00190216	0.323434
RAB15	1.68533	0.753034	0.0147256	0.518729
RAD51AP1	1.6853	0.753005	0.0226265	0.56566
MIR4701	1.68518	0.752902	0.00445326	0.405803
IQCA1	1.68458	0.75239	0.0467784	0.658576
KIF18A	1.68287	0.750922	0.0105079	0.489752
FAM57B	1.68142	0.749678	0.007593	0.457212
VPS9D1.AS1	1.6814	0.749666	0.0187183	0.542661
AFMID	1.68118	0.749474	0.0158624	0.525537
AC130650.2	1.68068	0.749045	0.000556869	0.260073
ZFP36L1	1.68051	0.748897	0.0153141	0.522614
AL512598.1	1.67889	0.747507	0.0277777	0.59248
CEP89	1.67795	0.746698	4.0632e-05	0.149027
NRARP	1.67794	0.746691	0.0098341	0.484489
CDC25C	1.67784	0.746605	0.0277175	0.59248
AC080038.2	1.67726	0.746104	0.0491973	0.667734
DNMT1	1.67692	0.745815	0.00298788	0.369258
POLE2	1.67667	0.745599	0.00249274	0.352736
TRMT1	1.67667	0.745597	0.00120554	0.30542
NTN5	1.67635	0.745321	0.0483619	0.663447
MARCKSL1	1.67543	0.744528	0.0433985	0.649509
AC010331.1	1.67485	0.744032	0.00175566	0.323434
AC009041.4	1.67401	0.743306	0.00237785	0.345993
PLXNA3	1.67345	0.742827	0.0453771	0.654282
MT1P1	1.67302	0.742456	0.00617934	0.437751
FOXE1	1.67249	0.741994	0.0180924	0.538434
LINC01003	1.67204	0.741613	0.00986158	0.484489
MELTF	1.67143	0.741079	0.0187729	0.542687
BUB1B	1.67139	0.741051	0.0307738	0.608404
AC074212.1	1.6703	0.740103	0.000895945	0.278033
C19orf71	1.6702	0.740024	0.00656664	0.443009
PLXNA1	1.6696	0.739507	0.0057333	0.437378
AC233723.2	1.66954	0.739451	0.00203602	0.334185
AC006001.2	1.6684	0.738464	0.00119018	0.30542
AC107956.1	1.66804	0.738152	0.00505272	0.421012
ZNF662	1.66767	0.737835	0.00964887	0.484489
NET1	1.66727	0.737485	0.00883691	0.478418
SMC4	1.66722	0.737442	0.00768153	0.4591
IER5L	1.66575	0.736168	0.0289179	0.59885
AC021028.1	1.66498	0.735505	0.00545405	0.430252
AL589843.1	1.66428	0.734896	0.0363923	0.631549
LINC00115	1.66208	0.732991	8.83246e-05	0.190245
NRBP2	1.66054	0.731653	0.0174572	0.536112
RPS2	1.65934	0.730606	0.000478479	0.250455
FAM135B	1.65813	0.729554	0.0392274	0.640254
AC022809.1	1.65808	0.729518	0.0137526	0.5144
AL590326.1	1.65724	0.728786	0.00806069	0.468912
ZNF146	1.65707	0.728631	1.71252e-05	0.149027
SH3BP4	1.65648	0.728124	0.0249288	0.577033
SNORA73B	1.65257	0.724707	0.0153235	0.522614
COL18A1	1.65255	0.724691	0.0342502	0.621356
TUBB4B	1.65101	0.723345	0.0100744	0.486521
GLI3	1.65094	0.723288	0.00553175	0.430252
PDCD4.AS1	1.65037	0.722786	0.0111532	0.492428
COL13A1	1.64996	0.722434	0.0308228	0.608734
ADCYAP1R1	1.64844	0.7211	0.0431172	0.648507
NPW	1.64777	0.720519	0.0200274	0.554866
LINC02298	1.64577	0.718765	0.0186911	0.542523
PNMA1	1.64476	0.717881	0.0100952	0.486521
RIMBP2	1.64349	0.716762	0.0427481	0.6465
TMSB15A	1.6433	0.716598	0.0497655	0.668509
RF00019.33	1.64306	0.716381	0.0136259	0.5144
KDELC2	1.64291	0.71625	0.0187001	0.542523
TGFB2	1.64199	0.715447	0.031535	0.61138
RPL35AP4	1.64154	0.715053	0.000769412	0.272671
CCNB1IP1	1.64088	0.714466	0.00354928	0.384719
ESPL1	1.64072	0.71433	0.0337381	0.618179
FANCG	1.64062	0.714241	0.00655116	0.443009
SLC25A5P1	1.64013	0.713808	7.50527e-06	0.106203
HMGB3	1.639	0.712819	0.0405569	0.643064
KIF23	1.63825	0.712158	0.0410567	0.6434
PCGF6	1.63717	0.711205	0.000269122	0.234351
RASA3	1.6347	0.709027	0.0135327	0.5144
PRR11	1.6342	0.708582	0.0375371	0.63518
NT5DC2	1.63361	0.708067	0.0463735	0.657194
TINCR	1.63336	0.707839	0.0168159	0.534722
CACNA1B	1.63314	0.707644	0.0331878	0.615327
LAMA4	1.63301	0.707535	0.0418659	0.644358
PAFAH1B3	1.63196	0.706608	0.0029816	0.369258
ARHGAP33	1.63196	0.706603	0.0188515	0.543572
TONSL.AS1	1.63181	0.706472	0.00207825	0.334185
NUDT19	1.63129	0.706014	0.0117971	0.498685
PTPRS	1.63083	0.705609	0.0226716	0.56566
KIF20B	1.62854	0.703581	0.0036858	0.390635
FAP	1.62851	0.70355	0.0499322	0.668527
AL162724.2	1.62848	0.703524	0.0316413	0.61138
C1QTNF2	1.62829	0.703354	0.0228925	0.567763
EEF1A1P5	1.62808	0.703171	0.0324446	0.612517
FBXO43	1.62771	0.702839	0.000811345	0.274993
CENPN	1.62677	0.70201	0.0156308	0.524841
AK5	1.6248	0.700264	0.0398722	0.641622
ADCY3	1.62445	0.69995	0.0264042	0.584983
LMNB2	1.62396	0.699517	0.00899781	0.480089
NOVA2	1.62384	0.699411	0.0481183	0.662266
FAM13C	1.62325	0.698881	0.0477712	0.661533
ANO1	1.62316	0.698804	0.00864944	0.475697
CKS2	1.62294	0.698612	0.0130379	0.508433
NACAD	1.62293	0.698599	0.0404888	0.643064
POLD1	1.62276	0.698453	0.00297252	0.369258
CCDC163	1.62275	0.698439	0.00398293	0.398597
MCC	1.62265	0.698353	0.02092	0.560324
CCNE1	1.61694	0.69327	0.0295031	0.600263
ZNF93	1.6168	0.693141	0.000555456	0.260073
SHMT2	1.61677	0.693114	0.00773752	0.459558
FAM216A	1.61652	0.692894	0.0123329	0.503159
ECT2	1.61569	0.69215	0.0424933	0.645267
EFHD1	1.61478	0.691342	0.0135085	0.5144
AL136295.6	1.61478	0.691339	0.00206424	0.334185
AP001029.1	1.61319	0.689916	0.018192	0.53925
NEURL1B	1.61144	0.688352	0.0171937	0.536097
UNC5B	1.61133	0.688256	0.029229	0.599746
ANGPT2	1.61127	0.688202	0.0403566	0.642549
AL139099.3	1.61101	0.687962	0.0163103	0.530574
BX649601.1	1.61098	0.687941	0.0131238	0.509448
GAS2L3	1.60981	0.686892	0.0289016	0.59885
KIF15	1.60904	0.686202	0.0178997	0.537585
NUDT9P1	1.60875	0.685937	0.00371676	0.390635
PPDPF	1.60853	0.685743	0.041605	0.644072
WDR62	1.6081	0.685354	0.014572	0.518653
SLC9A5	1.60784	0.685123	0.0251271	0.577033
AL133523.1	1.60779	0.68508	0.0207763	0.56
AC012615.1	1.60564	0.68315	0.0295738	0.601054
SNORD62B	1.60527	0.682813	0.0293666	0.60014
RPL18	1.6051	0.682662	0.00400941	0.398597
CENPW	1.60444	0.682074	0.0198827	0.552421
RACGAP1	1.60436	0.681996	0.0402774	0.642372
AP001160.3	1.60365	0.681356	0.0147897	0.518729
CEP83.DT	1.60323	0.680983	3.59664e-05	0.149027
MIER2	1.60305	0.680821	0.000427637	0.250455
HAUS8	1.60305	0.680821	0.015159	0.521363
YBX2	1.60303	0.680802	0.0101174	0.486521
TEDC1	1.6021	0.679966	0.00169537	0.322278
MCM7	1.60199	0.679862	0.013508	0.5144
DHFR	1.60188	0.679767	0.0196189	0.550828
TSHZ3	1.60138	0.679317	0.0222101	0.563735
QPCTL	1.60137	0.679304	0.00141476	0.312328
AL031963.3	1.60047	0.678498	0.00157712	0.316554
PMS2P5	1.59965	0.677759	0.00746171	0.453163
KNL1	1.59955	0.677667	0.0153916	0.522614
CBARP	1.5983	0.676542	0.0165029	0.533345
TGFB3	1.59812	0.676375	0.0179695	0.537585
ZSCAN1	1.59803	0.676297	0.0498218	0.668509
TONSL	1.59796	0.676231	0.0143879	0.518043
NAV2	1.59667	0.675067	0.00956022	0.484489
CHSY1	1.59644	0.674855	0.0282484	0.595278
AC027601.3	1.59635	0.674778	0.0120869	0.500837
LDHC	1.59542	0.673933	0.00983393	0.484489
CAMTA1.DT	1.59481	0.673389	0.00788432	0.465392
SLC5A4	1.59394	0.672594	0.0378781	0.637
AC104066.1	1.59359	0.672283	0.0225162	0.565527
GEM	1.59356	0.672249	0.0466842	0.658465
LRRC40	1.59331	0.672024	0.000388796	0.250455
BDNF	1.5932	0.671923	0.0385996	0.638995
NFATC1	1.59272	0.671493	0.00452546	0.407882
HIST1H1E	1.59248	0.671272	0.00223018	0.342588
EFNB2	1.59242	0.671224	0.0430142	0.647352
ZCCHC7	1.59176	0.670627	0.000388963	0.250455
AC106820.4	1.59152	0.670409	0.0139713	0.5144
ADAT3	1.59088	0.669828	0.0139446	0.5144
DZIP1	1.59005	0.669073	0.0410588	0.6434
UBA2	1.58978	0.668831	0.000170679	0.193215
AL139246.5	1.58849	0.667659	0.00793246	0.465542
RPL7A	1.58769	0.66693	0.00116442	0.30542
LOXL2	1.58649	0.665839	0.026516	0.584983
ARHGAP12	1.58642	0.665771	0.00549997	0.430252
MGAT3	1.58626	0.66563	0.0302069	0.604168
AL353747.2	1.58389	0.663468	0.0346506	0.622158
AC027559.1	1.58302	0.662676	0.0457476	0.654282
DM1.AS	1.58261	0.662308	0.00386986	0.393333
AL391244.1	1.58222	0.661954	0.00167318	0.321036
CTBP2	1.58182	0.661582	0.00895035	0.48
AL135925.1	1.58172	0.661496	0.000301002	0.244817
CLDN15	1.58158	0.66137	0.0292638	0.599746
CGAS	1.58012	0.660038	0.0479104	0.661646
NEIL3	1.58006	0.65998	0.0261509	0.584083
ORC1	1.58005	0.659973	0.0244325	0.575739
JRK	1.58005	0.65997	0.000407928	0.250455
HOMER3	1.57909	0.65909	0.0232062	0.569856
HNRNPF	1.57891	0.65893	0.000504902	0.252907
CRTAC1	1.57824	0.658321	0.024229	0.575651
ANP32B	1.57765	0.657776	0.0015721	0.316554
PIGZ	1.57746	0.657602	0.0123523	0.503159
ALDH1B1	1.577	0.657181	0.0137222	0.5144
NOTCH1	1.57634	0.656576	0.0183171	0.540449
AL121832.2	1.57632	0.656562	0.00716779	0.450302
GINS2	1.57602	0.656287	0.0388634	0.639647
MYL5	1.57583	0.656113	0.0143291	0.517256
DMBX1	1.57569	0.65598	0.0457866	0.654282
UBE2SP1	1.57528	0.655606	0.0302192	0.604168
C17orf82	1.57455	0.654938	0.0424975	0.645267
UBE2T	1.57413	0.654554	0.0497864	0.668509
BACE1	1.57388	0.654327	0.0336349	0.617662
RPS5	1.57359	0.65406	0.00219103	0.342464
SIGIRR	1.5735	0.653974	0.0456538	0.654282
AL391121.1	1.5709	0.651595	0.0108569	0.490128
RPL28	1.57075	0.651455	0.00822726	0.47044
PAXIP1.AS1	1.57067	0.65138	0.0040918	0.398597
ST3GAL2	1.56906	0.649903	5.71187e-05	0.164988
C9orf40	1.5683	0.649204	0.010949	0.490278
SERPINH1	1.56811	0.649027	0.0141122	0.515342
ARHGEF39	1.56777	0.648717	0.0117356	0.498566
VASH1	1.56734	0.648314	0.0346433	0.622158
CHD5	1.56729	0.648273	0.00517457	0.424956
CCDC18	1.56695	0.647958	0.00213184	0.339375
GTPBP4	1.56686	0.647875	0.0114845	0.497257
AL512625.2	1.56667	0.647699	0.00209309	0.335618
AC010442.1	1.56607	0.647152	0.015063	0.520829
SDHAF1	1.56479	0.645965	0.00207741	0.334185
RAN	1.56434	0.645551	0.0134473	0.5144
AC005481.1	1.56396	0.645199	0.0351868	0.625409
DOCK6	1.56347	0.644749	0.00230156	0.344581
LINC01144	1.56345	0.644731	0.00619035	0.437983
YME1L1	1.56332	0.644615	0.00298462	0.369258
FAM229A	1.56304	0.644353	0.00998431	0.486113
SNORD116.24	1.56299	0.644309	0.0119632	0.499808
SLC19A1	1.56226	0.643635	0.0115159	0.497257
CENPI	1.56218	0.643557	0.0255304	0.580583
CENPE	1.56205	0.643445	0.00919087	0.483229
PPP1R14B	1.5615	0.642929	0.00770739	0.4591
AC084125.4	1.56136	0.642808	0.00313228	0.371512
BRD3	1.56111	0.642568	0.00853281	0.473249
CDK2	1.56084	0.64232	0.00960202	0.484489
OBSCN.AS1	1.55883	0.64046	0.000443612	0.250455
AL133215.2	1.55633	0.638149	0.00355282	0.384719
RNU6.1337P	1.55616	0.637987	0.0386307	0.638995
RPS6	1.5561	0.637938	0.00246245	0.351082
MACROD1	1.55551	0.637389	0.0404529	0.643064
DHDDS	1.55498	0.636893	0.00526649	0.426612
AL118558.4	1.55494	0.636863	0.0121228	0.501956
NOC2L	1.55486	0.636783	0.00143106	0.312328
AJAP1	1.55446	0.636415	0.0305769	0.60661
GAREM2	1.55432	0.636281	0.0197786	0.551754
TTYH1	1.55414	0.636121	0.0178973	0.537585
AC006058.3	1.554	0.635987	0.00679626	0.446745
AL138724.1	1.55366	0.635668	0.00274908	0.360193
C9orf66	1.55365	0.63566	0.0244457	0.575739
GTF3C4	1.55333	0.635364	0.00189403	0.323434
ZNF667.AS1	1.55303	0.635085	0.0127067	0.504127
DGKD	1.55193	0.634063	0.00164846	0.321036
AL691403.2	1.55173	0.633882	0.0126107	0.504127
SYT3	1.55163	0.633785	0.0490278	0.666603
SSBP4	1.5514	0.633567	0.0168699	0.53524
C19orf54	1.55012	0.632385	2.08715e-05	0.149027
ADAM8	1.54958	0.63188	0.0407738	0.6434
MIGA2	1.54901	0.631347	0.00627628	0.439896
AC067930.3	1.54779	0.630207	0.00148037	0.312328
ERF	1.54771	0.630133	0.000570786	0.262664
AL163051.1	1.5477	0.630126	0.00437651	0.404986
AC092803.2	1.54769	0.630121	0.0100454	0.486521
PHETA2	1.54641	0.628921	0.0354687	0.626201
MMP23A	1.54591	0.628457	0.0035271	0.384719
FLT1	1.54564	0.628208	0.0130006	0.508433
MEX3D	1.54556	0.628133	0.0224919	0.565527
WDR5	1.54542	0.627995	0.00263328	0.357405
MIR320E	1.54517	0.627766	0.0113514	0.496867
TBX5	1.54485	0.627469	0.0411329	0.6434
AC093249.6	1.5445	0.627136	0.0148505	0.518847
DPF1	1.5443	0.626949	0.00319951	0.372406
ZNF496	1.54416	0.62682	0.00260894	0.357405
PKN3	1.54397	0.626647	0.0311864	0.610377
SEMA6D	1.54397	0.626644	0.0334412	0.617366
DNA2	1.54382	0.626504	0.00780373	0.46252
AC026436.1	1.5436	0.626298	0.00487789	0.41676
AC092117.1	1.54138	0.624224	0.00767532	0.4591
TFDP1	1.54109	0.623949	0.00637826	0.442972
EXOC3.AS1	1.54008	0.623006	0.0184949	0.540449
MAFG.DT	1.53975	0.622696	0.047397	0.661106
PLK4	1.53965	0.622603	0.0102553	0.488327
AC110285.6	1.53905	0.622036	0.0260238	0.583299
RFC3	1.53894	0.621933	0.015791	0.524841
SIX4	1.53889	0.621887	0.0176772	0.536112
NPM3	1.53875	0.621757	0.0233181	0.569856
THAP5P1	1.53866	0.621677	0.00147509	0.312328
ZNF667	1.53832	0.621356	0.0192803	0.547188
JMJD1C.AS1	1.53826	0.621297	0.0213454	0.561249
DOCK1	1.53788	0.620947	0.0249553	0.577033
PTPN3	1.53738	0.620476	0.0285733	0.598683
RCOR1	1.53713	0.620236	0.00292273	0.368446
SNHG10	1.5368	0.61993	0.00797602	0.466262
BCL2L12	1.53584	0.619025	0.00533528	0.426612
AL139022.2	1.53571	0.618903	0.00170813	0.322278
DHDH	1.5351	0.618335	0.0267273	0.586862
CALU	1.53476	0.61801	0.0222077	0.563735
ZFP1	1.53455	0.617815	0.000372948	0.250455
FBL	1.53406	0.617355	0.000836159	0.277358
AC139100.2	1.5334	0.61673	0.0259352	0.582969
GNG8	1.53328	0.616623	0.0320718	0.612517
PLIN3	1.53271	0.616088	0.0493957	0.668395
AKT2	1.53267	0.616048	0.00353337	0.384719
ZNF580	1.53234	0.615737	0.00120753	0.30542
SNAPC4	1.53208	0.615495	0.00961396	0.484489
ANKRD26	1.53161	0.615048	0.000120691	0.193215
KMT2B	1.53145	0.614894	0.000864623	0.277358
QSOX2	1.53099	0.614462	0.0468342	0.658576
AC005696.1	1.5309	0.61438	0.00808299	0.469726
AL645608.7	1.5308	0.614288	0.00173142	0.323434
AP000523.1	1.53056	0.614061	0.0417521	0.644358
MOV10L1	1.53029	0.613803	0.00893333	0.48
ARRDC1.AS1	1.52974	0.613287	0.00213451	0.339375
ERCC6L	1.5295	0.613063	0.0285847	0.598683
MASTL	1.52926	0.612837	0.0120599	0.500763
PDE10A	1.52919	0.612771	0.0346716	0.622158
AC022400.8	1.52884	0.612439	0.0291772	0.599746
AL591845.1	1.52861	0.612217	0.0134349	0.5144
DISP3	1.52847	0.612085	0.0190372	0.5453
AC090825.1	1.52818	0.611813	0.00132732	0.310451
ATP2B1.AS1	1.52788	0.611529	0.0169647	0.535424
AL136162.1	1.52779	0.611449	0.00361027	0.387023
ZNF618	1.52778	0.611434	0.00410736	0.398597
AL773545.3	1.52747	0.611144	0.027537	0.591793
EEF2	1.52703	0.610729	0.00772169	0.4591
NASP	1.52677	0.610487	0.00480801	0.415707
ZFP82	1.52675	0.610463	0.0176718	0.536112
RPL13A	1.52669	0.610406	0.00839325	0.471304
CPNE2	1.52656	0.610286	0.00420404	0.400809
ERVMER34.1	1.52624	0.609983	0.0148632	0.518847
SNHG12	1.52609	0.609845	0.0120559	0.500763
REEP4	1.52599	0.60975	0.017173	0.536097
ADAMTS13	1.52586	0.609623	0.0116882	0.49801
EVX1.AS	1.52564	0.609415	0.0242769	0.575651
AC090907.1	1.52523	0.609027	0.0378976	0.637
AP001527.2	1.52472	0.608546	0.00648303	0.443009
KCNJ14	1.52423	0.608077	0.00535041	0.426612
CSKMT	1.52396	0.607825	0.00974335	0.484489
SDHDP6	1.52224	0.606199	0.00419819	0.400809
DUTP6	1.52221	0.60617	0.00933298	0.483776
CACNA2D2	1.52181	0.605784	0.00687873	0.447799
SNHG29	1.5218	0.605775	0.0192805	0.547188
AC004471.1	1.52165	0.605641	0.00716584	0.450302
GSG1L	1.5216	0.605589	0.0185347	0.541331
WDR18	1.52123	0.605241	0.0456859	0.654282
AC138811.2	1.52115	0.605161	0.0181952	0.53925
TOLLIP.AS1	1.521	0.60502	0.0224143	0.564417
PTMAP9	1.52047	0.604516	0.00387576	0.393333
CCDC102A	1.52011	0.604173	0.0102637	0.488327
HMGN2	1.5197	0.603787	0.00315708	0.371512
PSMD5	1.51968	0.603766	0.0240641	0.574876
RUVBL2	1.51925	0.603363	0.00184762	0.323434
DDX39A	1.51874	0.602873	0.0215134	0.561324
HNRNPUL1	1.51801	0.602186	4.05074e-05	0.149027
HNRNPA1P10	1.51769	0.601881	0.00011232	0.193215
HMGN2P17	1.51674	0.60097	0.018724	0.542661
AL355297.4	1.51621	0.600473	0.00267602	0.357405
AL121845.4	1.51608	0.600342	0.00971728	0.484489
MZT1P2	1.51502	0.599341	0.0317795	0.61138
AC008403.4	1.51465	0.598985	0.0110936	0.491636
LIN37	1.51375	0.598123	0.000826008	0.277358
CIC	1.5137	0.598083	0.00179926	0.323434
AC087442.1	1.51252	0.596957	0.0462324	0.656839
AC015813.6	1.51236	0.596805	0.0138459	0.5144
AC138696.2	1.51145	0.595935	0.0456943	0.654282
NAB2	1.51115	0.595645	0.0102922	0.488327
NDOR1	1.50968	0.594247	0.00294539	0.369258
ZNF454	1.50966	0.594224	0.0303556	0.605268
VIM.AS1	1.50954	0.594107	0.0106696	0.489752
ZNF571.AS1	1.50807	0.592707	0.0359947	0.628962
TMEM240	1.50799	0.59263	0.0425047	0.645267
ACYP1	1.50788	0.592524	0.041908	0.644358
LINC01191	1.50753	0.592185	0.0424908	0.645267
STX2	1.50751	0.592167	0.0213099	0.561249
AC016825.1	1.50721	0.591885	0.011541	0.497302
PPP1R14BP3	1.50708	0.59176	0.0246155	0.575739
EXOSC5	1.50691	0.591592	0.00150491	0.312328
SLC25A43	1.50676	0.59145	0.045446	0.654282
ZNF781	1.50634	0.591048	0.00896598	0.480089
USP1	1.50617	0.590882	0.0151327	0.521363
ZNF627	1.50577	0.590504	0.00221354	0.342464
NUP188	1.50564	0.590377	0.00464686	0.41218
TCF19	1.50553	0.590267	0.0386936	0.638995
ZNF674.AS1	1.50491	0.589676	0.00630887	0.440478
PRKCH	1.50468	0.589459	0.0371	0.633291
EIF3A	1.50421	0.589007	0.0197064	0.551754
COLGALT1	1.50367	0.58849	0.0173084	0.536097
NOLC1	1.50333	0.588163	0.00559222	0.432939
PTMA	1.50321	0.588046	0.00410763	0.398597
PIF1	1.50318	0.588017	0.0470754	0.659863
CENPK	1.50243	0.587298	0.0472873	0.660551
AP001437.1	1.50238	0.587253	0.0142934	0.516424
PARP2	1.50181	0.586703	0.00597672	0.437378
KCNF1	1.50141	0.586317	0.010876	0.490128
AC025183.1	1.50119	0.586106	0.0360029	0.628962
ZRANB1	1.50018	0.585135	0.0323726	0.612517
LRRC3.DT	1.4996	0.584577	0.0281164	0.594051
MAGOH	1.49956	0.584539	0.00054039	0.260073
AC064807.1	1.49906	0.584061	0.0018577	0.323434
FOXS1	1.49882	0.583827	0.0264767	0.584983
ARL5B	1.49838	0.583404	0.0220463	0.563735
RPL18A	1.49816	0.583191	0.00727936	0.450302
ZNF331	1.49777	0.58282	0.037748	0.636767
SNORD93	1.49773	0.582776	0.0400327	0.641851
PARD3	1.49726	0.582325	0.0108659	0.490128
HMGN2P15	1.49711	0.582182	0.00966038	0.484489
GRIN3B	1.49672	0.581805	0.0232619	0.569856
PDGFA	1.49612	0.581229	0.0474758	0.661269
CMTM1	1.49612	0.581225	0.0022334	0.342588
THBS3	1.49608	0.581183	0.0315385	0.61138
AGO2	1.49589	0.581007	0.00507366	0.421084
NPM1	1.49508	0.580219	0.000760044	0.272671
H2AFZ	1.49398	0.579165	0.0167044	0.534536
SAE1	1.49331	0.578518	0.00881637	0.478418
LSM7	1.49311	0.578317	0.00313558	0.371512
AL357140.2	1.49284	0.578063	9.07497e-05	0.190245
PLXDC1	1.49171	0.576967	0.0268336	0.586862
IL11	1.49054	0.575839	0.028001	0.593608
RAVER1	1.4903	0.575603	0.0156678	0.524841
MED22	1.49012	0.57543	0.00490339	0.41676
ZMYND19	1.48991	0.575224	0.00743743	0.453163
MIS18BP1	1.48973	0.57505	0.00751214	0.454648
MIR933	1.48902	0.57436	0.00464137	0.41218
OR2B6	1.48862	0.573977	0.0106389	0.489752
GLI1	1.48853	0.573888	0.0267158	0.586862
TIMM50	1.48751	0.572898	0.000170404	0.193215
MIR4453HG	1.48647	0.571889	0.00305928	0.371512
AC068987.4	1.48573	0.571171	0.0103717	0.488681
IMPDH2	1.48547	0.570921	0.0114611	0.497257
RINL	1.48528	0.570731	0.00312113	0.371512
FAM225A	1.48524	0.570699	0.0370412	0.633105
RPS8	1.48522	0.570676	0.00517201	0.424956
AC139530.2	1.48508	0.570544	0.0149199	0.519371
ITGB1	1.48475	0.570223	0.0358685	0.627903
RHOQP1	1.48457	0.570046	0.00648465	0.443009
SH3D21	1.48433	0.569813	0.0340916	0.621145
AC004816.2	1.48428	0.569761	0.0127902	0.50555
TACC2	1.48355	0.569055	0.0134861	0.5144
CFAP46	1.48328	0.568793	0.00492273	0.416769
PITPNC1	1.48311	0.568623	0.0412997	0.643802
GMFB	1.48301	0.568524	0.0138107	0.5144
HES7	1.48288	0.568399	0.0235884	0.570061
COL23A1	1.4824	0.567933	0.0269507	0.586862
TRIM28	1.48224	0.567784	0.000592477	0.263531
C3orf80	1.48215	0.567696	0.0061768	0.437751
SMPD4P1	1.48182	0.567375	0.0490997	0.667421
PROSER3	1.48174	0.56729	0.00882367	0.478418
CYP2D6	1.48165	0.567205	0.00667733	0.445876
CD72	1.48139	0.566952	0.0220867	0.563735
AL391422.4	1.48132	0.566887	0.00846039	0.472729
PPRC1	1.48094	0.566512	0.00440046	0.404986
ZNF572	1.4805	0.566082	0.0471262	0.659872
LINC01521	1.47997	0.565572	0.00616384	0.437751
HIST1H3B	1.47959	0.565201	0.0135171	0.5144
RASIP1	1.47941	0.565024	0.0347649	0.622158
AL365203.2	1.47931	0.564925	0.0357681	0.627196
AL158211.5	1.47918	0.564799	0.0107623	0.489752
C17orf107	1.47883	0.564461	0.0133321	0.512304
WDR83	1.47838	0.564022	0.0126584	0.504127
AL359878.2	1.47833	0.563965	0.00362078	0.387417
AC016773.1	1.47749	0.563146	0.0211982	0.561249
SNORD15B	1.47726	0.56292	0.030901	0.609517
ZNF598	1.4771	0.562772	0.00117103	0.30542
JMJD1C	1.47709	0.562754	0.0027565	0.360332
C16orf74	1.47703	0.562699	0.0263281	0.584591
AL121929.2	1.47644	0.562127	0.0403363	0.642549
MIR6832	1.47635	0.562039	0.0225581	0.565527
SMC2	1.47627	0.561953	0.00862767	0.475042
AREL1	1.47627	0.561952	0.0105137	0.489752
ZNF296	1.47544	0.561149	0.0102169	0.487551
AL445228.2	1.47383	0.559574	0.00482566	0.416375
SCARNA13	1.47378	0.55952	0.0217944	0.561913
H2AFX	1.47376	0.559501	0.0460118	0.655515
ZNF529.AS1	1.47372	0.559458	0.0162966	0.530574
TMEM132B	1.47363	0.559377	0.000729252	0.272671
CAHM	1.47362	0.559367	0.0114451	0.497174
AL117336.1	1.4734	0.559152	0.0446019	0.652508
TCF7L2	1.47307	0.558825	0.000120372	0.193215
IBA57.DT	1.4728	0.558561	0.0032239	0.372406
RPL7AP66	1.47232	0.558088	0.00224582	0.343562
PRRC2B	1.47226	0.558031	0.0156324	0.524841
UBXN11	1.47211	0.557885	0.00339529	0.379802
TUBB	1.47187	0.557654	0.00941518	0.484489
SPIN1	1.47147	0.557257	0.00138728	0.312328
SPDL1	1.47133	0.557119	0.00408792	0.398597
SLC41A1	1.47119	0.556981	0.043346	0.649495
SYCE1L	1.4707	0.556498	0.0456372	0.654282
PPP5C	1.47007	0.555886	0.00338899	0.379802
IGFBPL1	1.46954	0.555361	0.0229708	0.567819
DDTL	1.46939	0.555213	0.02222	0.563735
LINC01659	1.46929	0.555124	0.0118919	0.499699
HMGN1P37	1.46913	0.554965	0.0135909	0.5144
EXO5	1.46855	0.554397	0.000190784	0.204354
ZDHHC8	1.46816	0.554012	0.00575764	0.437378
EID2	1.46799	0.553845	0.0132541	0.511448
DOK7	1.46799	0.553842	0.0342391	0.621356
AC007773.1	1.46718	0.553046	0.0270907	0.587955
NOP53	1.46556	0.551447	0.00426808	0.402237
NSD2	1.46484	0.550744	0.00962527	0.484489
DPH2	1.46372	0.549638	0.00278233	0.361027
RAPGEF1	1.46364	0.549557	0.0107638	0.489752
AL513365.2	1.46349	0.549414	0.00145332	0.312328
SNED1	1.46339	0.549316	0.0386333	0.638995
DBF4	1.46317	0.5491	0.0200547	0.554958
MED27	1.4631	0.549027	0.00489331	0.41676
ZNF710.AS1	1.46276	0.548689	0.0452789	0.654282
AC010336.5	1.46264	0.548575	0.0181194	0.538651
TMEM238	1.462	0.547939	0.0207496	0.559961
SUPT5H	1.46141	0.547356	8.99208e-05	0.190245
KHDC1	1.46139	0.547338	0.0394356	0.640943
SYCP2	1.46137	0.547318	0.00700645	0.448619
ZNF90	1.46073	0.546688	0.0263995	0.584983
RABAC1	1.45994	0.545904	0.00656641	0.443009
EVC2	1.45992	0.545893	0.0116983	0.49801
SNHG5	1.45943	0.545404	0.0402745	0.642372
LINC02361	1.45894	0.544918	0.0167821	0.534552
CCDC97	1.4588	0.544783	0.000164572	0.193215
NCS1	1.45861	0.54459	0.0367867	0.631714
MIR219A1	1.4584	0.54439	0.0360698	0.629018
CSNK1E	1.45839	0.544373	0.00387046	0.393333
MIB2	1.4575	0.543497	0.000290751	0.244817
ZNF876P	1.45725	0.543247	0.010588	0.489752
CHST2	1.45705	0.543054	0.0255918	0.58102
SGSM2	1.45623	0.54224	0.0216745	0.561324
MCMBP	1.45606	0.542073	0.00562953	0.432939
CHEK1	1.45575	0.541761	0.0442346	0.650875
AC005020.2	1.4557	0.541717	0.025874	0.582969
CKMT2.AS1	1.45557	0.541588	0.00711883	0.450302
SUPT16H	1.45512	0.541139	0.00643836	0.443009
NPEPL1	1.45462	0.540647	0.0170642	0.535924
C19orf47	1.45457	0.540588	0.00232458	0.344581
ZNF324	1.45369	0.539719	0.000321617	0.244817
ARHGAP35	1.45353	0.539558	0.0032976	0.376823
KPTN	1.45331	0.539345	0.0118877	0.499699
TEX22	1.45282	0.53886	0.0160124	0.52641
CENPL	1.45241	0.538445	0.00406714	0.398597
KMT5C	1.45225	0.53829	0.0237821	0.572329
AP000759.1	1.45187	0.537915	0.0365746	0.631637
MTPAP	1.45159	0.537633	0.000156848	0.193215
SRSF11	1.4511	0.53715	4.47593e-05	0.149027
WDR88	1.45107	0.53712	0.000481811	0.250455
HNRNPA1P8	1.45101	0.537061	0.00159146	0.317183
SUMO3	1.45093	0.536979	0.0202695	0.557043
RPS24P7	1.45089	0.536938	0.00121615	0.30542
FBXO46	1.4508	0.536845	0.00379956	0.393333
RPS29	1.4503	0.536349	0.0251704	0.577033
AL355987.4	1.4502	0.536257	0.0254577	0.579862
LINC01410	1.44994	0.53599	0.00606451	0.437378
DUSP5P1	1.44982	0.535873	0.0166119	0.534409
CCDC183.AS1	1.44974	0.535798	0.0146406	0.518653
HAUS5	1.44964	0.535696	0.00893855	0.48
PHF13	1.44903	0.535083	0.00480295	0.415707
CHAF1B	1.44874	0.534795	0.0280364	0.593907
RSU1	1.44799	0.534056	0.00429256	0.402237
CLSPN	1.44718	0.533248	0.0292635	0.599746
AC016394.1	1.44712	0.533184	0.0183313	0.540449
RPS15	1.44672	0.532783	0.00993203	0.485584
RPL13AP5	1.44659	0.532657	0.0294611	0.600164
PNN	1.44616	0.532222	0.00166394	0.321036
IL17RE	1.44607	0.532141	0.0417575	0.644358
ATAD3A	1.44594	0.532007	0.0191509	0.546361
NOB1	1.44564	0.531706	0.00813493	0.47033
ANXA2R	1.44513	0.531204	0.0184708	0.540449
HIST1H3G	1.44482	0.530889	0.018351	0.540449
MCM4	1.4447	0.530767	0.0383482	0.638286
RPL5	1.44415	0.530216	0.00263588	0.357405
MCM5	1.44414	0.530208	0.0415339	0.644072
KNSTRN	1.44312	0.529195	0.0171445	0.535924
ACBD7	1.44292	0.528992	0.0495331	0.668509
RADIL	1.44285	0.528923	0.0156007	0.524841
WFIKKN1	1.44239	0.528463	0.0481925	0.662266
HSPA14	1.44218	0.528247	0.00117603	0.30542
CBWD1	1.44166	0.527733	0.00402402	0.398597
PCK1	1.44157	0.527641	0.0439307	0.650538
ZBTB5	1.44154	0.527615	0.0248933	0.576742
NRAS	1.44146	0.527532	0.0191373	0.546361
RPL35	1.44109	0.527157	0.0127839	0.50555
C5orf34	1.44108	0.52715	0.0347145	0.622158
CELSR3	1.44069	0.526764	0.0400847	0.641851
POLE3	1.44064	0.52671	0.00681934	0.446745
ZNF487	1.44023	0.526295	0.00832027	0.47044
AC002398.1	1.44019	0.526261	0.0440966	0.650743
FAM171A2	1.44008	0.526145	0.0481971	0.662266
KIF12	1.43948	0.52555	0.0245369	0.575739
AFAP1L2	1.43933	0.525395	0.0356368	0.627196
AL590666.1	1.4385	0.524568	0.0126119	0.504127
DCHS1	1.43825	0.524314	0.0248763	0.576742
MIR544B	1.43824	0.524301	0.00871799	0.475849
SPIN4	1.438	0.524061	0.014819	0.518729
SAR1A	1.43795	0.524012	0.00116714	0.30542
AL353747.3	1.43775	0.523811	0.0495883	0.668509
CACNB3	1.43741	0.523468	0.0490242	0.666603
AL645998.1	1.43704	0.523096	0.0106221	0.489752
NACC2	1.43655	0.522613	0.0257305	0.581861
PSIP1	1.43612	0.522181	0.00315145	0.371512
DDX21	1.43601	0.522065	0.0432544	0.649413
CCDC102B	1.43573	0.521785	0.0276746	0.59248
ZNF696	1.43506	0.521109	0.00277938	0.361027
RN7SL181P	1.4348	0.520854	0.00353584	0.384719
RPS24	1.43476	0.520808	0.0158942	0.525537
MBTPS1	1.43465	0.520701	0.0345978	0.622158
MYRF	1.43432	0.520363	0.0122234	0.503159
AL928654.1	1.43415	0.520196	0.0194376	0.549118
HNRNPA1	1.43411	0.520158	0.000223668	0.219989
RBM3	1.43362	0.519661	0.0392314	0.640254
TAS2R14	1.43333	0.519373	0.0147694	0.518729
CARD8	1.4332	0.519244	0.0128952	0.507789
AC114490.1	1.43268	0.518721	0.000991844	0.28643
LINC02302	1.43234	0.51837	0.00107949	0.296608
LRRC8A	1.43219	0.51822	0.0167025	0.534536
AC002116.2	1.43218	0.518218	0.00831119	0.47044
RPL7AP50	1.43201	0.518045	0.0221102	0.563735
RPL12	1.43161	0.517637	0.0180124	0.538006
HHIPL1	1.4313	0.517323	0.0119398	0.499699
AC004812.2	1.43095	0.516973	0.0204621	0.557043
LRFN2	1.43087	0.516892	0.0486285	0.665392
TOR4A	1.43078	0.516803	0.0481447	0.662266
SMC5	1.43072	0.516742	0.00488257	0.41676
NOX4	1.43066	0.51668	0.0440303	0.650743
GPC2	1.43033	0.516347	0.0331368	0.615327
PHF2	1.43028	0.516296	0.00726711	0.450302
AC078852.2	1.43007	0.516086	0.00136929	0.312328
EEF1AKMT2	1.42982	0.515836	0.000349383	0.250455
FOXCUT	1.42967	0.515681	0.00274861	0.360193
ZADH2	1.4296	0.515616	0.0031255	0.371512
CENPT	1.4295	0.51551	0.0470355	0.659802
ATG14	1.42946	0.515472	3.11291e-05	0.149027
MESP2	1.42919	0.515197	0.0309092	0.609517
ELOVL1	1.42906	0.515068	0.0477208	0.661533
AL022328.1	1.42899	0.514994	0.0161125	0.527178
MAZ	1.42897	0.514976	0.0296073	0.601129
PLOD3	1.42885	0.514857	0.0176379	0.536112
FANCC	1.42851	0.514506	0.0218749	0.562612
SRRM4	1.42836	0.514361	0.0312317	0.610842
RPS19	1.42817	0.514169	0.0466317	0.65838
RPL11	1.42806	0.514055	0.00474962	0.415707
F7	1.4278	0.513789	0.0230867	0.568648
SKI	1.42743	0.513421	0.00978451	0.484489
NXNL2	1.42725	0.513236	0.00376112	0.39278
LRRC42	1.42687	0.512859	0.0367682	0.631714
ERH	1.42651	0.512488	0.00380185	0.393333
BCCIP	1.4264	0.51238	0.000778947	0.272671
HMGN2P41	1.42602	0.511995	0.0426296	0.646376
AC011472.1	1.4259	0.511876	0.0106018	0.489752
JPT2	1.42588	0.511856	0.0363915	0.631549
KCNQ4	1.42556	0.51153	0.00695567	0.448619
DUSP8P5	1.42552	0.511484	0.00354258	0.384719
RNASEH2A	1.42548	0.511444	0.0167062	0.534536
SNHG17	1.42535	0.511312	0.0191434	0.546361
WASF2	1.4253	0.511261	0.00579057	0.437378
CIP2A	1.42519	0.511151	0.0356946	0.627196
PHF19	1.42512	0.511084	0.0303973	0.605826
ZNF324B	1.42501	0.510971	0.0027258	0.359182
AC010336.2	1.42426	0.510212	0.0177185	0.536112
AC044787.1	1.42372	0.509665	0.00518325	0.424956
AC011444.3	1.42294	0.508871	0.00153778	0.312711
LINC01391	1.42245	0.508378	0.00671768	0.445876
TIMM9	1.42241	0.508336	0.00450294	0.406499
SMC3	1.4223	0.508227	0.0093018	0.483776
GLMN	1.42191	0.507834	0.00466656	0.412713
AC072061.1	1.42169	0.507611	0.0151768	0.521565
AC104117.5	1.42116	0.507074	0.00607073	0.437378
FAF1	1.4211	0.507013	0.00165603	0.321036
AC022150.4	1.42109	0.507001	0.00932992	0.483776
CNTN5	1.42091	0.506811	0.0219878	0.563735
DDX50	1.42047	0.506369	0.0109118	0.490278
P3H1	1.42037	0.506269	0.00753232	0.45501
GLUD1P3	1.42013	0.506018	0.00703958	0.449704
LIG1	1.41985	0.50574	0.0254391	0.579806
KDM5B	1.41879	0.504664	0.020461	0.557043
SUPV3L1	1.41869	0.504559	0.00038153	0.250455
SET	1.41855	0.504422	0.0106392	0.489752
GPBP1L1	1.41835	0.504209	6.42001e-05	0.173041
CLASRP	1.41821	0.504074	0.00788507	0.465392
HDAC4	1.41807	0.503928	0.00744272	0.453163
LIN52	1.41804	0.503899	0.000483845	0.250455
CAPN15	1.418	0.503856	0.00513203	0.42373
HEATR3	1.4179	0.503756	0.0105848	0.489752
CCT6P1	1.41788	0.503739	0.00187439	0.323434
HMGN1	1.41786	0.503713	0.0163715	0.53195
RPP25L	1.41753	0.503383	0.00719342	0.450302
HYI	1.4175	0.50335	0.00182661	0.323434
OXCT1.AS1	1.4173	0.503144	0.0388365	0.63939
RPL13	1.41722	0.503062	0.00883318	0.478418
DHFRP1	1.41721	0.503056	0.0403531	0.642549
SNHG15	1.41695	0.502793	0.025153	0.577033
Z98884.2	1.41694	0.502782	0.0172514	0.536097
APEX1	1.41581	0.501631	0.0113144	0.496708
ZNF511	1.41574	0.501556	0.00310068	0.371512
ZNF436	1.41568	0.501494	0.0367355	0.631714
ZBTB45	1.41538	0.501186	0.00793962	0.465542
CASP2	1.41479	0.500587	0.0010145	0.287478
KMT2E	1.41419	0.499978	0.00437268	0.404986
RPS18	1.41412	0.499904	0.0315013	0.61138
NDST1	1.41408	0.49986	0.00969988	0.484489
ATAD3B	1.41397	0.499747	0.0239176	0.574123
ZNF497	1.41392	0.499701	0.0160682	0.52695
PTP4A2P1	1.41315	0.498917	0.017066	0.535924
NCAPD2	1.41287	0.498632	0.0307922	0.608555
SNRPA	1.41287	0.498628	0.000867324	0.277358
FUT8	1.41267	0.498427	0.0354468	0.626123
C5orf66.AS1	1.412	0.497742	0.0169797	0.535424
BEND3	1.41187	0.497602	3.43473e-05	0.149027
CARM1	1.41183	0.497567	0.00895516	0.48
AL118506.1	1.41178	0.497511	0.0326163	0.612552
RCC2	1.41121	0.49693	0.00811913	0.47033
C8G	1.411	0.496715	0.0407989	0.6434
PRR19	1.41098	0.496694	0.0401297	0.642063
G2E3	1.4108	0.496511	0.00222049	0.342464
MLLT3	1.41042	0.496125	0.0175709	0.536112
MTA1	1.40986	0.495555	0.00554139	0.430252
HIST1H2AJ	1.40981	0.4955	0.027317	0.590463
AC092807.2	1.40917	0.494849	0.00398992	0.398597
INPP5E	1.40902	0.494687	0.0340611	0.621145
ZYG11A	1.40895	0.494618	0.00676923	0.446044
AC098484.2	1.4089	0.494574	0.00987322	0.484489
CAD	1.40882	0.494492	0.0221344	0.563735
DIP2A	1.40856	0.494225	0.00180523	0.323434
RNF19A	1.40856	0.494222	0.00462656	0.41218
RPUSD1	1.40856	0.494217	0.00132318	0.310451
AC012313.2	1.40795	0.493594	0.040693	0.643064
CRAMP1	1.40783	0.493472	0.000498654	0.252007
LRRC56	1.4078	0.493441	0.0333437	0.616369
ZBTB12	1.40769	0.493333	0.0441252	0.650743
RPS3	1.40749	0.493125	0.0239379	0.574123
LRR1	1.40747	0.493109	0.0167585	0.534552
RFWD3	1.4062	0.491799	0.0175074	0.536112
AGAP4	1.40607	0.491665	0.0120759	0.500763
LSM14A	1.40603	0.491632	0.00130378	0.310451
AL158212.3	1.4059	0.491495	0.0129006	0.507789
ZNF212	1.40553	0.491112	0.00183453	0.323434
PAXIP1	1.40541	0.490987	0.00398632	0.398597
C9orf163	1.4049	0.490463	0.0127095	0.504127
ACE	1.40486	0.490424	0.0447943	0.653385
AF186192.2	1.4048	0.49036	0.000388544	0.250455
CIZ1	1.40474	0.490299	0.003075	0.371512
KIF22	1.4045	0.49006	0.00644838	0.443009
ABL1	1.4044	0.489955	0.00182934	0.323434
ZNF526	1.40438	0.489937	0.000412432	0.250455
UQCRH	1.40403	0.489571	0.00427855	0.402237
CREM	1.40399	0.489536	0.0421044	0.644978
AC010343.1	1.40378	0.489315	0.0202899	0.557043
AC093627.5	1.4037	0.489239	0.00150461	0.312328
RNF152	1.40366	0.489195	0.0316976	0.61138
AC026412.3	1.40355	0.489078	0.00150588	0.312328
TASOR2	1.40337	0.488897	0.00687951	0.447799
STAG1	1.40307	0.488587	0.0245263	0.575739
ODF2	1.40228	0.487777	0.00803399	0.468321
DMAC2	1.40228	0.487776	0.0012483	0.308543
EXOSC3	1.40218	0.487672	0.00868159	0.475697
DCLRE1B	1.4018	0.487277	0.0166274	0.534409
SIPA1L1	1.40166	0.487135	0.0260952	0.583579
CUL2	1.40165	0.487127	0.00221542	0.342464
N4BP2	1.40116	0.486623	0.00832795	0.47044
KIF24	1.4011	0.486559	0.0264673	0.584983
AP003390.1	1.40093	0.486385	0.0380614	0.637571
TNFAIP8L1	1.40059	0.486036	0.0129194	0.508174
ITPR1.DT	1.40055	0.485996	0.0397109	0.641622
MIR6768	1.40053	0.48597	0.0353133	0.62591
AL731577.2	1.40018	0.485613	0.0218721	0.562612
NDC1	1.40007	0.485503	0.0190416	0.5453
SLF2	1.40006	0.485484	0.0270092	0.586862
HIST1H2AL	1.39996	0.485382	0.00722035	0.450302
SUV39H2	1.39955	0.484967	0.0176322	0.536112
SOX21.AS1	1.39938	0.484792	0.00551323	0.430252
DSN1	1.39937	0.484774	0.00584859	0.437378
PPAN	1.39932	0.484722	0.00649583	0.443009
HLTF	1.3992	0.484603	0.0147757	0.518729
POM121	1.39915	0.484553	0.0311814	0.610377
POLQ	1.39879	0.484183	0.0410815	0.6434
TRIL	1.39876	0.484148	0.0452516	0.654282
URAHP	1.39871	0.484099	0.0238946	0.574123
SDCBP2	1.39844	0.483819	0.0412943	0.643802
AC012313.4	1.39793	0.483289	0.00562293	0.432939
SERBP1	1.39745	0.482794	0.0107843	0.490128
AL079343.1	1.39723	0.482569	0.000840672	0.277358
TEAD1	1.39711	0.482444	0.0325308	0.612552
H1FX.AS1	1.39711	0.482441	0.041712	0.644358
HMGB3P24	1.39704	0.482368	0.0164272	0.532729
TUBGCP2	1.39666	0.481978	0.0013625	0.312328
DBNDD2	1.39643	0.481739	0.0241388	0.575461
MIR5695	1.39636	0.481673	0.0248575	0.576742
PDSS1	1.39636	0.48167	0.00342485	0.380851
SMPD5	1.39616	0.481467	0.0119099	0.499699
MYL6B	1.39608	0.481385	0.0334304	0.617366
RPL36A	1.39602	0.481318	0.0166311	0.534409
AC091057.1	1.39554	0.480822	0.0127065	0.504127
IDUA	1.39549	0.48077	0.0280469	0.593907
AL589743.6	1.39534	0.48062	0.0458482	0.654502
RASAL2.AS1	1.3953	0.480576	0.00264267	0.357405
ZNF362	1.39528	0.480558	0.00498616	0.41866
TRMT5	1.39472	0.47998	0.00031098	0.244817
NELFB	1.3947	0.479955	0.014671	0.518653
EXOSC2	1.39464	0.479896	0.0047927	0.415707
SAMD1	1.39435	0.479589	0.0134854	0.5144
BFAR	1.39382	0.479042	0.000673799	0.272671
AGAP6	1.39345	0.478658	0.0424474	0.645267
ZNF548	1.39339	0.478603	0.00174919	0.323434
EFS	1.39314	0.478338	0.0311795	0.610377
AC233280.2	1.39302	0.478217	0.0499117	0.668527
AL353691.2	1.3929	0.478089	0.00383527	0.393333
RTL10	1.39282	0.478008	0.0319468	0.61138
SSU72	1.39252	0.477695	0.00242039	0.349488
AC007663.3	1.39249	0.477669	0.00899557	0.480089
ARHGAP31.AS1	1.39212	0.477283	0.00528997	0.426612
EBLN3P	1.39191	0.477069	0.0297151	0.601129
SCLT1	1.3917	0.476845	0.000323808	0.244817
PRPF4	1.3916	0.476747	0.0106153	0.489752
RPL29	1.39133	0.476463	0.0141506	0.515654
FOXF1	1.39127	0.476401	0.00399865	0.398597
MYSM1	1.39114	0.476268	0.00621248	0.438452
DGKI	1.39089	0.476008	0.00174953	0.323434
AC087741.3	1.39067	0.475777	0.00790331	0.465542
PUM3	1.39011	0.475194	0.00735026	0.453098
AC009163.6	1.38987	0.474946	0.0145562	0.518653
RNF214	1.38984	0.474924	0.00416869	0.400809
RFC2	1.38983	0.474909	0.0157369	0.524841
LINC01311	1.38966	0.474727	0.00803101	0.468321
BCORL1	1.3894	0.474467	0.0139824	0.5144
AL136040.1	1.38889	0.473932	0.0262163	0.584083
ERFE	1.38882	0.473855	0.0400434	0.641851
MTF2	1.38855	0.473578	0.00552931	0.430252
CCDC6	1.38826	0.473273	0.00346797	0.384137
CYP2F2P	1.38822	0.473237	0.0328132	0.612968
PABPC4	1.3882	0.473218	0.0108452	0.490128
BCL2L2.PABPN1	1.38816	0.473177	0.0042425	0.401561
ZNF462	1.38813	0.473143	0.0344921	0.622158
ZNF70	1.38792	0.472927	0.000740176	0.272671
PRR7.AS1	1.38778	0.47278	0.0275774	0.592071
NANOS3	1.38775	0.472746	0.0296597	0.601129
UTP11	1.38763	0.472627	0.00165834	0.321036
NIP7	1.38746	0.472444	0.0156483	0.524841
MVB12A	1.38728	0.472261	0.0223487	0.564417
HIVEP1	1.38709	0.472065	0.0135852	0.5144
SASS6	1.38703	0.471994	0.0191625	0.546416
AL353621.1	1.38676	0.471721	0.025642	0.58102
AC010864.1	1.38674	0.471698	0.00548763	0.430252
RBM42	1.38611	0.471041	0.00267325	0.357405
SPRED2	1.38595	0.470874	0.0253701	0.578799
CLEC18B	1.38578	0.4707	0.028595	0.598683
RGL2	1.38564	0.470555	0.0252857	0.577667
NOL8	1.38556	0.470468	0.00601166	0.437378
ZNF248	1.38539	0.470294	0.0073594	0.453098
AC009053.1	1.38533	0.470225	0.00191848	0.323434
RAD9A	1.38531	0.470211	0.0156243	0.524841
DMTF1	1.38518	0.470073	0.00970171	0.484489
AC008969.1	1.38482	0.469696	0.00356158	0.384719
PCNX4	1.38468	0.469557	0.00249225	0.352736
ZNF428	1.38464	0.469507	0.0182693	0.540271
RN7SL521P	1.3844	0.469257	0.0444712	0.652054
QKI	1.38417	0.469024	0.0300477	0.603748
HMGN2P4	1.38416	0.469013	0.00198784	0.331905
AC002310.6	1.38415	0.469001	0.0447246	0.653291
RNU6.407P	1.38382	0.468658	0.0067588	0.445876
AC104170.1	1.38343	0.468253	0.0225986	0.56566
GDI2	1.38331	0.468127	0.017422	0.536112
CHST7	1.38291	0.467708	0.00976993	0.484489
FAM167A	1.38257	0.467353	0.0366931	0.631637
SBF1	1.38246	0.467235	0.0205968	0.558087
HNRNPA1P48	1.38202	0.466774	0.0012981	0.310451
RRP9	1.38198	0.466735	0.00959761	0.484489
AC021242.3	1.38191	0.466665	0.0268058	0.586862
RAB12	1.38171	0.466452	0.0111456	0.492428
RNU1.129P	1.38104	0.465757	0.00448797	0.406445
AC104619.1	1.38102	0.465736	0.0136724	0.5144
AL138781.1	1.38093	0.465638	0.0497588	0.668509
AL049872.1	1.38091	0.465623	0.0165086	0.533345
ZNF273	1.38088	0.465586	0.00435951	0.404986
AC131235.1	1.38068	0.465383	0.0336029	0.617662
RGS9BP	1.38061	0.465305	0.011194	0.493077
ARL6IP6	1.38059	0.46529	0.0462794	0.656928
RPS28	1.38053	0.465225	0.0387329	0.638995
NPM1P27	1.38041	0.465101	0.0128244	0.506196
SYNGAP1	1.38022	0.464894	0.0214279	0.561249
CRYBB3	1.37994	0.464602	0.00810607	0.47033
AC124319.4	1.37982	0.464485	0.0157093	0.524841
SEPHS1	1.37975	0.464407	0.0106145	0.489752
ZNF786	1.37963	0.464284	0.0031796	0.371842
AC093620.1	1.37946	0.464106	0.0337106	0.618179
PIWIL4	1.37913	0.463757	0.0096865	0.484489
KNTC1	1.37894	0.463563	0.0450092	0.654282
ZNF644	1.37883	0.463444	0.000779417	0.272671
TAF3	1.37879	0.4634	0.00287928	0.367639
KIAA0355	1.37867	0.463274	0.00714214	0.450302
PPP2R5E	1.37857	0.463173	0.00312252	0.371512
VEGFA	1.37854	0.463142	0.0274877	0.59158
TOPBP1	1.37833	0.462925	0.0098466	0.484489
NCAPD3	1.37821	0.462799	0.0217041	0.561324
GPATCH1	1.37805	0.462633	0.00268016	0.357405
HMG20B	1.37784	0.462403	0.0146311	0.518653
ABRAXAS2	1.37738	0.46193	0.00492131	0.416769
PRPF38A	1.37712	0.461654	0.0049919	0.41866
LARP4B	1.3769	0.461422	0.0124965	0.504127
CEP85	1.37686	0.46138	0.012415	0.504097
ZNF282	1.37654	0.461052	0.00441011	0.404986
AC061992.1	1.37609	0.460579	0.029114	0.599378
ZNF251	1.37586	0.460332	0.0153338	0.522614
PDIA4	1.37584	0.460308	0.0341623	0.621145
AL031710.2	1.37581	0.460286	0.0421378	0.645267
DESI2	1.37576	0.460233	0.04663	0.65838
CEP72	1.37576	0.460224	0.0154247	0.523223
DENND2A	1.37565	0.460118	0.0417983	0.644358
PMS2P3	1.37561	0.460069	0.0457764	0.654282
RGP1	1.37555	0.460012	0.00964908	0.484489
ASB6	1.37545	0.459905	0.0195524	0.550326
SCFD1	1.37544	0.459889	0.00182016	0.323434
AF111169.3	1.37523	0.459674	0.00874998	0.477135
ODF2L	1.37516	0.459603	0.0495537	0.668509
UMPS	1.37496	0.459391	0.0122153	0.503159
FKBP1AP1	1.37485	0.459272	0.00203599	0.334185
AL031432.3	1.37483	0.459251	0.0208308	0.560254
GOLGA2	1.37468	0.459093	0.00231493	0.344581
MTG1	1.37448	0.458886	0.0176123	0.536112
RLF	1.37444	0.458841	0.00127269	0.310451
TOMM5	1.3744	0.458803	0.0207554	0.559961
CLEC2L	1.3743	0.458696	0.0160508	0.52695
UTP4	1.37421	0.4586	0.00956346	0.484489
FIGNL2	1.37414	0.458524	0.000943444	0.284047
EIF2A	1.37413	0.458516	0.00351447	0.384719
DHX15	1.37394	0.458321	0.00567483	0.435239
CEP170	1.37368	0.458044	0.0164153	0.532729
ERICD	1.37331	0.45766	0.0122753	0.503159
PPP2R5C	1.37318	0.457523	0.0322529	0.612517
AL133415.1	1.37296	0.457287	0.0204364	0.557043
CAMTA1	1.37291	0.457236	0.0096877	0.484489
ZNF473	1.37291	0.457233	0.0109731	0.490366
ZDHHC6	1.37283	0.457157	0.00598488	0.437378
ITGB3	1.37274	0.45706	0.0213628	0.561249
TAF1B	1.37246	0.456762	0.0229828	0.567819
AC004233.3	1.37236	0.456659	0.0314042	0.611357
PPP6R1	1.37235	0.456645	0.0117923	0.498685
CHAF1A	1.37208	0.456361	0.0431842	0.648772
SARS2	1.37199	0.456273	0.0075183	0.454648
PAF1	1.37189	0.456163	0.00591397	0.437378
NUP205	1.37153	0.455788	0.0144662	0.518199
KHSRP	1.37126	0.455505	0.0054489	0.430252
SND1	1.37122	0.455463	0.0127023	0.504127
MTAP	1.37109	0.455318	0.0173597	0.536097
GLI4	1.37087	0.455092	0.0405299	0.643064
IKBIP	1.37081	0.455026	0.0439053	0.650538
AC000089.1	1.37044	0.454642	0.0489835	0.666603
ANKRD18A	1.37041	0.454607	0.0415803	0.644072
HIST2H2BD	1.37035	0.454548	0.0259618	0.582969
EPC1	1.37027	0.454455	0.000629688	0.27103
ENAH	1.37023	0.454419	0.0308407	0.608876
XRCC2	1.36997	0.454143	0.0322176	0.612517
MRGBP	1.36988	0.454053	0.00232644	0.344581
ZWILCH	1.36983	0.453999	0.0423146	0.645267
NAA35	1.36978	0.453946	0.0220339	0.563735
ZNF865	1.36957	0.453718	0.0022824	0.344581
MIR1273C	1.36924	0.453378	0.025445	0.579806
CENPP	1.3688	0.452916	0.028771	0.59885
CCNE2	1.36842	0.45251	0.0455031	0.654282
AL137002.1	1.3684	0.452489	0.046815	0.658576
EEF1D	1.36817	0.452243	0.00706855	0.450019
AL591438.2	1.368	0.452071	0.0287003	0.59885
EIF4EBP2	1.36796	0.452029	0.0247391	0.576424
ZEB1	1.36746	0.451497	0.0168533	0.535015
AP4S1	1.36746	0.451496	0.0166454	0.534409
PARGP1	1.36722	0.451245	0.0136836	0.5144
TOR2A	1.36704	0.451051	0.0441481	0.650743
WNT7B	1.36698	0.450996	0.0198904	0.552421
GNAI3	1.36693	0.450941	0.0235816	0.570061
AL355987.5	1.36678	0.450779	0.0420164	0.644358
RPLP2	1.36663	0.450627	0.0314379	0.611357
AL161729.4	1.36643	0.450412	0.0300139	0.603712
AL353803.3	1.36639	0.450369	0.0124866	0.504127
VRK1	1.36632	0.4503	0.0305821	0.60661
SLC25A51	1.36632	0.450299	0.0212651	0.561249
AGAP3	1.36597	0.449931	0.00731457	0.451493
AL845472.2	1.36593	0.449885	0.00603546	0.437378
CSTF3	1.36574	0.449685	0.00345656	0.383624
PAK4	1.36568	0.449616	0.0179947	0.537807
TNRC18	1.3654	0.449323	0.00724988	0.450302
ZNF507	1.36525	0.449167	0.000241964	0.228261
RBM25	1.36496	0.448864	0.00118207	0.30542
PTBP2	1.36456	0.44844	0.0135719	0.5144
AC005197.1	1.3644	0.448264	0.0146056	0.518653
ABRAXAS1	1.36423	0.448089	0.00765947	0.4591
NUDT21	1.36396	0.447804	0.00671087	0.445876
JOSD1	1.36382	0.447657	0.0485696	0.665392
AC018690.1	1.36372	0.447549	0.0176407	0.536112
PABPC1	1.36372	0.447543	0.0219995	0.563735
AL731571.1	1.36369	0.447514	0.0207834	0.56
ST6GALNAC6	1.36364	0.44746	0.0109396	0.490278
UBE2R2	1.36334	0.447143	0.0054595	0.430252
RPS11	1.36333	0.447138	0.0146965	0.518729
RNU5E.10P	1.36318	0.446973	0.00923095	0.483776
AC074117.1	1.36299	0.446777	0.00743291	0.453163
PHTF2	1.36273	0.446499	0.0046474	0.41218
CNKSR1	1.36257	0.446335	0.0367985	0.631714
AP000936.3	1.36253	0.446292	0.0373573	0.634441
BANP	1.36238	0.446128	0.00429937	0.402237
NF2	1.3623	0.446043	0.0189069	0.544088
AC073195.1	1.36227	0.44601	0.0185896	0.541641
MSH4	1.3616	0.445306	0.026984	0.586862
AC112777.1	1.36155	0.445249	0.00957827	0.484489
MAP6D1	1.36146	0.445152	0.0107382	0.489752
HNRNPA3	1.36134	0.445026	0.00481058	0.415707
CCHCR1	1.36119	0.444864	0.0287927	0.59885
PKN2	1.36082	0.444477	0.00428257	0.402237
AHCY	1.3606	0.444241	0.00851406	0.473249
AC116533.1	1.36049	0.444131	0.0475821	0.661533
PARD6G	1.36022	0.443836	0.0122126	0.503159
MZF1.AS1	1.36007	0.44368	0.0170471	0.535924
IRGQ	1.36004	0.443651	0.0126004	0.504127
TAF9	1.35979	0.443384	0.00675351	0.445876
RPL18AP3	1.35971	0.443294	0.0428205	0.646844
HKR1	1.35958	0.44316	0.00337902	0.379802
AL139393.2	1.35955	0.443128	0.0157719	0.524841
LINC01389	1.35951	0.443086	0.00978668	0.484489
PRR14	1.35935	0.442915	0.0131318	0.509448
AC007383.2	1.35934	0.442911	0.0286439	0.59885
MRTO4	1.35918	0.44274	0.00657647	0.443144
CCDC88A	1.35913	0.44268	0.0203541	0.557043
ZNF485	1.35909	0.442639	0.0119735	0.499808
ZNF326	1.35887	0.442405	0.000797342	0.273522
CPNE5	1.35881	0.44234	0.0311804	0.610377
AC087683.2	1.35879	0.442317	0.0361585	0.629018
AL137060.1	1.35878	0.442308	0.00919469	0.483229
AC018868.1	1.3587	0.442229	0.0216451	0.561324
RPS10	1.35857	0.442086	0.0239716	0.574312
AL353796.1	1.3585	0.442011	0.0100633	0.486521
NDUFB2.AS1	1.35842	0.441933	0.000420043	0.250455
BHLHA15	1.35832	0.441828	0.00204014	0.334185
AC007391.1	1.35818	0.441674	0.0180663	0.538434
AP000255.1	1.35807	0.441563	0.00267239	0.357405
NCDN	1.35787	0.44135	0.0107385	0.489752
AC087623.2	1.35774	0.44121	0.0252525	0.577589
VKORC1L1	1.35757	0.441031	0.0237018	0.571123
TOPORS	1.3574	0.440842	0.012524	0.504127
AC093616.1	1.35737	0.440815	0.0299498	0.60371
AC116351.2	1.35723	0.440665	0.00959797	0.484489
HASPIN	1.35687	0.440288	0.0478608	0.661646
DCBLD1	1.35675	0.440158	0.0106723	0.489752
TRAF7	1.35658	0.43997	0.0164861	0.533345
APOA1.AS	1.35649	0.439882	0.0236184	0.570328
AC108472.1	1.35647	0.439858	0.0061566	0.437751
B3GAT1	1.35647	0.439855	0.00435124	0.404986
ZNF788P	1.35604	0.439397	0.0254906	0.580145
SEMA3F	1.35542	0.438736	0.0357071	0.627196
MRTFB	1.35535	0.438665	0.0381665	0.637624
XRCC1	1.35511	0.438412	0.0038755	0.393333
HIST1H3C	1.35506	0.43836	0.0259604	0.582969
DCAF15	1.35402	0.437249	0.0200221	0.554866
ALOX12	1.35375	0.436965	0.0195973	0.550828
DEF8	1.35357	0.436774	0.00830313	0.47044
SMNDC1	1.35344	0.436632	0.00601818	0.437378
UQCRHL	1.35329	0.436468	0.000605261	0.263531
ARID3C	1.3532	0.436374	0.0245684	0.575739
DPCD	1.35298	0.436143	0.0181967	0.53925
CPSF1	1.3527	0.435838	0.0159285	0.525537
STOML2	1.35261	0.435749	0.0171095	0.535924
TET1	1.35248	0.435611	0.0256042	0.58102
ALKBH6	1.3524	0.435518	0.0259525	0.582969
EIF3G	1.35209	0.43519	0.0296963	0.601129
C18orf54	1.35098	0.434003	0.0348638	0.622762
MEGF8	1.35087	0.433889	0.049826	0.668509
AC007686.3	1.35082	0.433833	0.0118249	0.499115
AL513320.1	1.35051	0.433502	0.0260414	0.583299
RABL6	1.35048	0.433469	0.010123	0.486521
TAF6	1.35044	0.433425	0.0486809	0.665404
RBM17	1.35034	0.433328	0.00613038	0.437614
TMTC2	1.34991	0.432866	0.0290564	0.598926
AL355802.1	1.34982	0.432771	0.0223442	0.564417
MIR550A3	1.34932	0.432234	0.00637444	0.442972
CYP2D7	1.34926	0.432165	0.0210405	0.560664
EHBP1	1.34923	0.432136	0.0207874	0.56
ZNF565	1.34907	0.431967	0.00118626	0.30542
EXOSC10	1.34867	0.431538	0.00424083	0.401561
RPL8	1.3478	0.430607	0.0163021	0.530574
AC022239.1	1.34758	0.430371	0.0334022	0.617248
RPS2P7	1.34757	0.430356	0.0245782	0.575739
GBA2	1.34756	0.430348	0.0213899	0.561249
FAM149B1	1.34751	0.430293	0.0018511	0.323434
ILF3	1.34745	0.430235	0.0044556	0.405803
PMPCA	1.34726	0.430025	0.011848	0.499699
GMPS	1.34714	0.429898	0.0157315	0.524841
RPL7AP30	1.34698	0.429726	0.0239901	0.574312
ZNF132	1.34676	0.429497	0.0327509	0.612968
ANKRD13C	1.34675	0.42948	0.000690056	0.272671
CEP83	1.34659	0.429314	0.0211862	0.561249
GGN	1.34658	0.429297	0.0438212	0.650333
UBA52	1.34657	0.429292	0.0187712	0.542687
HS2ST1	1.34645	0.429158	0.0134436	0.5144
INSYN2	1.34606	0.428741	0.00122487	0.30542
ZNF629	1.346	0.428681	0.0168007	0.534722
KCTD21.AS1	1.34595	0.428625	0.0188501	0.543572
CDHR3	1.34567	0.428325	0.00531561	0.426612
AL049780.1	1.34529	0.427913	0.0419347	0.644358
TGFB2.AS1	1.34524	0.427867	0.0123507	0.503159
WBP2NL	1.34484	0.427437	0.000145122	0.193215
STRN4	1.3447	0.427286	0.0062738	0.439896
DNAJC2	1.34452	0.427091	0.0015064	0.312328
SEPT7P9	1.34444	0.427009	0.00309636	0.371512
AL513534.2	1.34436	0.42692	0.0299934	0.603712
ZNF566	1.34408	0.426622	0.0242247	0.575651
CREB3	1.34401	0.426547	0.00577524	0.437378
AC012360.1	1.34384	0.426361	0.00230846	0.344581
ZBTB2	1.34383	0.42635	0.0172866	0.536097
KCNG2	1.34364	0.426142	0.0138877	0.5144
AC138028.6	1.34362	0.426126	0.00330874	0.376823
MEN1	1.34337	0.425853	0.0304969	0.606529
TNPO2	1.34318	0.425655	0.028611	0.598683
ATXN2.AS	1.34251	0.424928	0.0461248	0.655932
EIF3K	1.34184	0.424208	0.00672647	0.445876
AC012313.6	1.34177	0.424135	0.0267032	0.586862
TRIM59	1.34173	0.424099	0.0365911	0.631637
MARK4	1.34169	0.42405	0.0206401	0.558713
SNORC	1.34142	0.423759	0.0284002	0.596479
ZNF202	1.34112	0.423442	0.0138551	0.5144
AC018761.1	1.34099	0.423302	0.0170722	0.535924
UBAC1	1.34097	0.423272	0.00591671	0.437378
ZNF782	1.34074	0.423031	0.0405166	0.643064
PDCD11	1.34073	0.423022	0.0179649	0.537585
RPS11P5	1.3405	0.422774	0.0231772	0.569639
EMC1	1.34046	0.42273	0.0217084	0.561324
EIF4H	1.34043	0.422699	0.00823271	0.47044
AL035417.2	1.34041	0.422669	0.0177308	0.536112
AC093157.1	1.34037	0.422632	0.0413393	0.643888
GAPVD1	1.34021	0.422462	0.0111092	0.491636
AL353807.2	1.34009	0.42233	0.0273238	0.590463
EPB41L4A.AS1	1.34003	0.422266	0.0350167	0.624453
AC005261.5	1.33997	0.422205	0.0201524	0.55588
SMU1	1.33997	0.422198	0.00166606	0.321036
AL157832.1	1.33988	0.422105	0.00474704	0.415707
BMS1	1.33978	0.421998	0.00613101	0.437614
BICRA	1.33969	0.421899	0.00937172	0.484436
RTRAF	1.33952	0.421719	0.00288625	0.367639
YBX1	1.33947	0.421664	0.0317765	0.61138
CEP41	1.33922	0.421388	0.0214581	0.561324
ZBTB8A	1.3391	0.421268	0.0239965	0.574312
LRP2BP	1.33903	0.421183	0.0311683	0.610377
BICD2	1.33822	0.420319	0.019614	0.550828
URM1	1.33818	0.420272	0.0202483	0.557043
APBA3	1.33818	0.420267	0.0184846	0.540449
MTF1	1.33804	0.42012	0.00142464	0.312328
AGGF1P2	1.33781	0.419877	0.0486683	0.665392
RPL7AP6	1.33758	0.419623	0.0305807	0.60661
RF00019.19	1.33742	0.419454	0.0454562	0.654282
ZMYM1	1.33731	0.419337	0.000672359	0.272671
FAM230C	1.3373	0.419325	0.0204483	0.557043
NOP53.AS1	1.33712	0.419125	0.0126488	0.504127
LINC01775	1.33707	0.419071	0.011015	0.490461
ZNF574	1.33703	0.419034	0.00698929	0.448619
HNRNPCP2	1.33701	0.419008	0.0323527	0.612517
AL445483.1	1.33674	0.418715	0.0259874	0.583013
AL589843.2	1.336	0.41792	0.0312745	0.611256
CCNT2.AS1	1.33585	0.417759	0.0295694	0.601054
NR2C2AP	1.33569	0.417583	0.0205211	0.557625
TMEM141	1.33542	0.417296	0.0159975	0.52641
CFAP45	1.33535	0.417222	0.0110704	0.491071
LINC02001	1.33534	0.417204	0.0470052	0.659542
SLC27A4	1.3353	0.417168	0.038541	0.638995
PSCA	1.33529	0.417158	0.0126061	0.504127
LYAR	1.33526	0.417116	0.0275926	0.592071
NAA50	1.33493	0.416769	0.0178301	0.53739
FAM27E3	1.33492	0.416752	0.00962627	0.484489
AP006545.2	1.33482	0.416648	0.0176422	0.536112
AL138762.1	1.33447	0.416265	0.0161295	0.527178
RFXANK	1.33436	0.41615	0.0167249	0.534536
MPST	1.33436	0.416149	0.0208783	0.560254
COL11A2	1.33351	0.415228	0.0233826	0.569856
AP000251.1	1.33349	0.415212	0.0438091	0.650333
EDRF1	1.3334	0.415114	0.00668975	0.445876
AC007881.3	1.33333	0.415029	0.00878933	0.478359
TTC32	1.33329	0.414988	0.0467873	0.658576
IKZF5	1.33327	0.41497	0.0174303	0.536112
HOMER3.AS1	1.33299	0.414663	0.014046	0.5144
USE1	1.33297	0.41464	0.0229932	0.567828
MUS81	1.33258	0.414222	0.0136253	0.5144
KLHL23	1.33248	0.41411	0.0294876	0.600164
SLITRK5	1.33186	0.413444	0.0044683	0.405803
NFX1	1.33179	0.413371	0.0111318	0.492253
AKT1S1	1.33167	0.413233	0.0198584	0.552421
NUDT5	1.3316	0.413163	0.0160149	0.52641
RPSAP9	1.33133	0.412867	0.0246368	0.575761
TCERG1	1.3311	0.412624	0.0042896	0.402237
RNASEH1	1.33082	0.412315	0.0314183	0.611357
TIAL1	1.33077	0.412257	0.00964077	0.484489
RASSF1.AS1	1.33066	0.412144	0.0226708	0.56566
C12orf4	1.33053	0.412001	0.000318534	0.244817
SNRNP70	1.33038	0.411838	0.0174246	0.536112
FKBP4	1.32995	0.411376	0.046344	0.657194
DNTTIP2	1.3299	0.411321	0.00139715	0.312328
SIKE1	1.32969	0.411085	0.0132409	0.511448
FAM118A	1.32942	0.410802	0.0332191	0.61546
NCBP2.AS2	1.32912	0.410476	0.00871374	0.475849
AC139887.2	1.32906	0.410409	0.0326536	0.612616
ZBED4	1.32895	0.410284	0.0222019	0.563735
MRPS12	1.32894	0.410278	0.0208659	0.560254
ALDH18A1	1.32894	0.410274	0.00262477	0.357405
ZNF484	1.32891	0.410245	0.00159136	0.317183
MEI1	1.3289	0.41023	0.0472863	0.660551
DCAF10	1.32889	0.410217	0.0215827	0.561324
AL096701.3	1.3288	0.410124	0.00607852	0.437378
RPS6KC1	1.32869	0.410004	0.0265192	0.584983
ANKRD27	1.32829	0.409575	0.0210567	0.560664
KIF1C	1.32823	0.409501	0.0274311	0.591037
AC012462.3	1.32809	0.409348	0.0136562	0.5144
DPY19L2P1	1.32796	0.409212	0.0276221	0.592222
KDELR1	1.32785	0.409095	0.0232784	0.569856
PATL1	1.32766	0.408888	0.00885252	0.478577
AC104073.2	1.32756	0.408782	0.00221141	0.342464
PSTK	1.32731	0.408507	0.013477	0.5144
AC118549.1	1.32718	0.408366	0.000896993	0.278033
TSC1	1.32706	0.408239	0.0309906	0.609921
IVNS1ABP	1.32705	0.408224	0.0287496	0.59885
AC006946.3	1.32697	0.40814	0.0210432	0.560664
ZNF567	1.32695	0.408111	0.0106377	0.489752
AC022007.1	1.32676	0.407903	0.0323784	0.612517
EHMT1	1.32674	0.407888	0.0322678	0.612517
PPP1R12C	1.3267	0.407839	0.00648751	0.443009
AC128687.2	1.32664	0.407775	0.00561213	0.432939
PHF5A	1.32645	0.407573	0.0332293	0.61546
GUCD1	1.32624	0.407345	0.0215146	0.561324
RNA5SP243	1.32574	0.4068	0.0400948	0.641851
PTBP1	1.3256	0.406645	0.000962459	0.285098
PTPDC1	1.3254	0.40643	0.0245853	0.575739
ZNF606	1.32514	0.406145	0.0340403	0.621145
HIST1H2BM	1.32488	0.405858	0.00301099	0.370496
AL360270.3	1.32484	0.405824	0.022633	0.56566
GRHPR	1.32461	0.405568	0.0270023	0.586862
DAZAP1	1.32454	0.40549	0.00253202	0.354745
USF2	1.32444	0.405381	0.0121731	0.502934
MMACHC	1.32441	0.405349	0.0259538	0.582969
SNORA12	1.32439	0.405328	0.0496724	0.668509
VTI1B	1.32421	0.40513	0.0117712	0.498685
AC102945.2	1.324	0.404899	0.0169198	0.535424
CNTLN	1.32393	0.404827	0.0234872	0.570061
MTHFD1	1.32383	0.404723	0.0322782	0.612517
FABP5P7	1.32348	0.404336	0.0405989	0.643064
MINDY3	1.3232	0.404028	0.0218766	0.562612
RAB28	1.32318	0.404011	0.0289689	0.59885
PLCG1.AS1	1.32307	0.403888	0.00697764	0.448619
DENND5A	1.32296	0.403772	0.0201482	0.55588
AC145285.6	1.32295	0.403756	0.00898517	0.480089
RPARP.AS1	1.32266	0.403438	0.0455125	0.654282
AL359881.2	1.32263	0.403412	0.0183301	0.540449
FAM86B3P	1.32241	0.403169	0.0320954	0.612517
AL603839.2	1.32237	0.403129	0.0105427	0.489752
OSGEP	1.32226	0.403001	0.0184897	0.540449
SPTLC2	1.32215	0.40289	0.0158105	0.52518
ST3GAL3	1.32211	0.402839	0.0344691	0.622144
AXDND1	1.32204	0.402764	0.048732	0.66546
ZBTB32	1.32134	0.401999	0.00233547	0.344581
ZNF514	1.32106	0.401701	0.0326851	0.612796
POLR2I	1.32078	0.401389	0.0200789	0.554958
ZMYM4	1.32068	0.401279	0.00152914	0.312541
PPP1R37	1.32043	0.401011	0.019483	0.549981
AC009902.2	1.32043	0.401008	0.0154281	0.523223
SRM	1.32029	0.40085	0.0360341	0.629018
RPS2P55	1.32029	0.40085	0.0427211	0.6465
ZSWIM9	1.32019	0.400741	0.00550654	0.430252
CCDC130	1.31994	0.400471	0.0427578	0.6465
SRSF4	1.31979	0.40031	0.000132781	0.193215
AC010201.1	1.31952	0.400017	0.0350912	0.624994
WDR27	1.31935	0.399822	0.0480691	0.661997
ZNF425	1.31928	0.399748	0.0445354	0.652378
SMIM12	1.31915	0.39961	0.00867896	0.475697
MTOR	1.31859	0.398996	0.021202	0.561249
AC099778.1	1.31856	0.398965	0.0427472	0.6465
HMGXB4	1.31814	0.398505	0.0119298	0.499699
AL662844.4	1.31786	0.398193	0.0377497	0.636767
AC073389.3	1.31754	0.39785	0.0307523	0.608404
LRRC36	1.31742	0.397717	0.0354247	0.626123
SNAPC3	1.31736	0.397654	0.0116417	0.49801
FRG1HP	1.31732	0.397603	0.0251268	0.577033
EXD2	1.31718	0.397448	0.0212904	0.561249
MED12L	1.3171	0.397364	0.0139668	0.5144
SOX21	1.31703	0.397286	0.0227069	0.565942
EMC3.AS1	1.31683	0.397073	0.0239786	0.574312
AC010999.1	1.31671	0.396935	0.0119302	0.499699
PRMT1	1.31653	0.396737	0.049008	0.666603
ZNF512B	1.3164	0.3966	0.0222055	0.563735
POLR2H	1.31607	0.396239	0.0264507	0.584983
ARFIP2	1.31596	0.396111	0.0149612	0.519962
CAMSAP1	1.31585	0.396	0.0343402	0.621815
SPDEF	1.31566	0.395786	0.0113856	0.496867
ZNF17	1.31557	0.395685	0.0164333	0.532729
TAF2	1.31549	0.395596	0.0422502	0.645267
YEATS2	1.31519	0.395268	0.0247216	0.576315
AF186192.1	1.31506	0.395132	0.0223031	0.564322
NOP56	1.31475	0.394791	0.0237496	0.571789
ZNF280C	1.31462	0.394648	0.00954474	0.484489
SLC39A13	1.3146	0.394628	0.0314416	0.611357
HCG18	1.31456	0.394585	0.00689622	0.447799
EIF4G3	1.31454	0.394563	0.0023694	0.345993
CHERP	1.31451	0.394523	0.0293945	0.60014
TTLL5	1.31424	0.394233	0.00123098	0.305596
ISG20L2	1.31402	0.393988	0.0350527	0.624899
GNL2	1.31389	0.393844	0.00858401	0.473452
FAM21FP	1.31362	0.393552	0.00534146	0.426612
SNORA80B	1.31355	0.393473	0.015609	0.524841
IPO7	1.31315	0.393033	0.0317899	0.61138
SNW1	1.31286	0.392712	0.011308	0.496708
TYSND1	1.31277	0.392609	0.0414246	0.644072
GEMIN4	1.31276	0.392602	0.0171411	0.535924
PRDM12	1.31265	0.392484	0.0344174	0.622027
FUBP3	1.31244	0.39225	0.0250578	0.577033
LINC01711	1.31213	0.391909	0.0415569	0.644072
SLBP	1.31196	0.391724	0.0453266	0.654282
ING5	1.31192	0.391684	0.0268559	0.586862
PTPN12	1.31192	0.39168	0.0305764	0.60661
STX10	1.31182	0.391569	0.0138148	0.5144
KRI1	1.31165	0.391378	0.0250411	0.577033
COPS7B	1.31165	0.391378	0.0234976	0.570061
AC079140.5	1.31162	0.391347	0.0443722	0.651338
NUP93	1.31145	0.391167	0.00696661	0.448619
AC012360.3	1.31143	0.39114	0.0170618	0.535924
FBXW5	1.31141	0.391123	0.0264833	0.584983
AL132656.4	1.31106	0.390733	0.0134102	0.5144
NFXL1	1.3107	0.390336	0.035241	0.625497
MRPS2	1.31066	0.390299	0.0324596	0.612517
AGBL5.AS1	1.3106	0.390232	0.00386407	0.393333
PDS5A	1.31056	0.390186	0.0190974	0.545661
THAP9.AS1	1.31055	0.390168	0.0437829	0.650275
EIF4A2	1.31035	0.389957	0.036107	0.629018
GTF3C5	1.31029	0.389887	0.0262837	0.584591
THRAP3	1.31009	0.389666	0.00135891	0.312328
CNTROB	1.30981	0.389361	0.0197648	0.551754
RF00019.654	1.3095	0.389016	0.00843189	0.472069
AC027644.2	1.3094	0.388903	0.0291355	0.599465
PPIA	1.30927	0.388763	0.0116501	0.49801
MUTYH	1.30912	0.388596	0.0233742	0.569856
RNF32	1.30897	0.388429	0.0140127	0.5144
CBL	1.30861	0.388032	0.00956055	0.484489
POFUT2	1.3083	0.387691	0.0480655	0.661997
TMEM250	1.30825	0.387641	0.0098345	0.484489
HMGN2P40	1.30824	0.387626	0.00928521	0.483776
SMARCA4	1.30799	0.387352	0.0222995	0.564322
RNY4P37	1.30779	0.38713	0.0468303	0.658576
AC008393.1	1.30777	0.387108	0.0347941	0.622158
DHX38	1.30772	0.387051	0.0175743	0.536112
ERCC2	1.30761	0.386928	0.0264467	0.584983
TCF20	1.30759	0.386909	0.0158915	0.525537
ZNF821	1.30733	0.38662	0.0430011	0.647352
AL133153.2	1.30726	0.386545	0.0233493	0.569856
WAC	1.30718	0.386456	0.0225683	0.565527
ZNF8	1.30711	0.386378	0.00727275	0.450302
ERCC6L2	1.30683	0.386075	0.0101086	0.486521
HIST2H2AB	1.30679	0.386027	0.00244658	0.351008
AC006504.5	1.30606	0.385217	0.0271655	0.588861
FOXJ3	1.30586	0.385002	0.00289713	0.367639
SNORA54	1.30556	0.384672	0.004963	0.41866
MED8	1.30551	0.384612	0.0192318	0.547188
CNOT3	1.30544	0.384536	0.0111704	0.492773
PCNT	1.30516	0.384225	0.0487144	0.665415
ELOF1	1.30516	0.384224	0.0406055	0.643064
SS18L1	1.30513	0.38419	0.0189174	0.544088
LRRC14	1.30513	0.384189	0.00269683	0.358324
EIF3EP1	1.30476	0.383781	0.0176149	0.536112
RACK1	1.30464	0.383651	0.0115226	0.497257
NUP54	1.30459	0.383597	0.0411068	0.6434
MIR762HG	1.3045	0.383497	0.0102796	0.488327
VTI1A	1.30434	0.383317	0.00205929	0.334185
ALMS1.IT1	1.30396	0.382897	0.0395237	0.640943
RAD23A	1.30395	0.382889	0.0198838	0.552421
AC145285.2	1.30379	0.382709	0.00304679	0.371512
AGAP14P	1.30354	0.382433	0.0232683	0.569856
NSD3	1.30344	0.382323	0.0255141	0.580447
ZNF131	1.30341	0.382288	0.00650753	0.443009
STAG3L2	1.30324	0.3821	0.0457362	0.654282
AC021087.3	1.3031	0.381952	0.000808562	0.274993
C1QTNF12	1.30309	0.381941	0.0343586	0.621815
AC131097.4	1.30281	0.381626	0.0070436	0.449704
KIF26B	1.30281	0.381625	0.0490117	0.666603
ARHGEF1	1.30251	0.3813	0.023153	0.569499
ZNF250	1.30244	0.381218	0.00739977	0.453163
MLLT10	1.30226	0.381022	0.0452008	0.654282
WT1	1.30191	0.380633	0.030613	0.60661
CPSF1P1	1.30148	0.380149	0.0309255	0.609517
SEC23IP	1.30116	0.379802	0.0427671	0.6465
ANKIB1	1.30072	0.379308	0.0339205	0.619544
DHX34	1.30065	0.379228	0.0206071	0.558087
PPIAP22	1.30051	0.379077	0.031357	0.611357
AC004854.1	1.30042	0.378975	0.0394663	0.640943
OR51E1	1.30003	0.378545	0.021369	0.561249
TRBJ2.2	1.30003	0.378542	0.027725	0.59248
BX255923.1	1.29986	0.378355	0.0310859	0.610098
HIF1A.AS2	1.29984	0.378334	0.0197694	0.551754
AC005005.3	1.29957	0.378037	0.0126816	0.504127
DNAJC16	1.29894	0.37733	0.00632474	0.440478
HMCN1	1.29873	0.377106	0.0181888	0.53925
NCBP1	1.29868	0.377044	0.0410516	0.6434
AC022210.1	1.29858	0.376937	0.00183874	0.323434
AC008267.6	1.29847	0.376818	0.0122476	0.503159
ERI1	1.29819	0.376496	0.0284176	0.596622
TCFL5	1.29807	0.376373	0.0336429	0.617662
GNL3	1.29796	0.376245	0.0246483	0.575792
RNA5SP160	1.29765	0.375898	0.00580265	0.437378
TFAM	1.29731	0.375529	0.0124662	0.504127
TUBBP1	1.29718	0.37538	0.012383	0.503159
CHRAC1	1.29709	0.375281	0.041118	0.6434
PRKCSH	1.29708	0.375269	0.0158789	0.525537
SRRM1	1.297	0.375179	0.000478293	0.250455
RYBP	1.29688	0.375042	0.0457683	0.654282
FARSA	1.29685	0.375011	0.0103863	0.488681
ZNF442	1.2966	0.374735	0.0412311	0.64345
MYLK2	1.29659	0.374719	0.00741132	0.453163
ZNF446	1.29639	0.374502	0.0150816	0.521076
TBRG4	1.29625	0.374341	0.0141225	0.515386
GEMIN2	1.29621	0.374301	0.0461002	0.655932
AF129075.2	1.29615	0.374235	0.0256388	0.58102
RINT1	1.29602	0.374093	0.0353388	0.62591
RPS13	1.29559	0.373608	0.029818	0.602771
NSUN4	1.29544	0.37344	0.0234247	0.570061
PARL	1.29533	0.373323	0.0128467	0.506723
TLN1	1.29522	0.373201	0.0209367	0.560324
CYP2B7P	1.29515	0.373116	0.0447975	0.653385
SIGMAR1	1.29499	0.372939	0.023994	0.574312
TTF1	1.29466	0.372569	0.0251342	0.577033
PABPN1	1.29448	0.372375	0.0417509	0.644358
SIVA1	1.29444	0.372327	0.0449255	0.653702
RPL3	1.29435	0.37223	0.0440766	0.650743
LSP1P2	1.29435	0.372226	0.00830549	0.47044
SNRPD2	1.29426	0.372128	0.0277071	0.59248
DDX49	1.29416	0.372012	0.0436173	0.649594
TTC5	1.29406	0.371906	0.0130401	0.508433
ZNF155	1.29386	0.371686	0.0425701	0.645819
WAPL	1.29363	0.371421	0.0117019	0.49801
BORCS8.MEF2B	1.29304	0.370769	0.0161222	0.527178
CCDC77	1.29288	0.37059	0.0404779	0.643064
CEP164	1.29248	0.370137	0.0324533	0.612517
HIF1A.AS1	1.29247	0.370131	0.0170277	0.535924
CDC123	1.29229	0.369926	0.024903	0.576742
AGO1	1.29227	0.369905	0.032166	0.612517
Z99916.2	1.29215	0.369771	0.0386365	0.638995
KIAA0586	1.29194	0.369543	0.00454884	0.409338
CCDC17	1.29179	0.369373	0.0361741	0.629018
MARCH5	1.29151	0.369054	0.0461387	0.655932
NFYC.AS1	1.29128	0.368802	0.0180489	0.538434
RAB40C	1.291	0.368494	0.00855869	0.473452
GPATCH2L	1.29077	0.368237	0.0159106	0.525537
ZNF510	1.29075	0.368215	0.0439696	0.650538
DFFA	1.29073	0.36819	0.0104532	0.489752
RPL36A.HNRNPH2	1.29048	0.367904	0.000455997	0.250455
GPR137C	1.29043	0.367853	0.0495017	0.668509
PRR12	1.28982	0.367169	0.0392268	0.640254
NAPA.AS1	1.28978	0.367124	0.0169278	0.535424
LCMT1.AS1	1.28966	0.366992	0.0337476	0.618179
ZNF787	1.28965	0.36698	0.0409135	0.6434
RN7SL825P	1.28927	0.366557	0.00163158	0.321036
TYK2	1.28913	0.3664	0.0240385	0.574832
ZSWIM8	1.28904	0.366292	0.0496205	0.668509
AL132656.2	1.28882	0.36605	0.00957336	0.484489
LZIC	1.28876	0.365984	0.0243375	0.575739
C1orf159	1.28866	0.365873	0.0235711	0.570061
NDUFB6	1.28863	0.36584	0.0401493	0.642063
NUP62	1.28855	0.365749	0.0475974	0.661533
ZNF628	1.28851	0.365703	0.00643216	0.443009
AC011445.1	1.28828	0.365442	0.0451741	0.654282
MEIOB	1.28821	0.365371	0.000324393	0.244817
UBE2V1	1.2882	0.365353	0.0144618	0.518199
FAM204A	1.28799	0.365118	0.000603588	0.263531
C10orf88	1.28762	0.364707	0.00842874	0.472069
PRRC2A	1.28761	0.364696	0.027745	0.59248
MED6	1.28742	0.364487	0.0469369	0.659163
AL121992.2	1.28742	0.364482	0.00593862	0.437378
TRIOBP	1.28705	0.364066	0.0217505	0.561644
SP3	1.28698	0.363992	0.00980146	0.484489
ZNF776	1.28698	0.363985	0.027061	0.587762
AP005899.1	1.28663	0.363594	0.0302292	0.604168
ZNF544	1.28656	0.363521	0.0328936	0.613037
C1orf109	1.28651	0.363459	0.0388308	0.63939
GTF2A1	1.28645	0.36339	0.031473	0.61138
DVL1	1.28618	0.363097	0.00591423	0.437378
NSUN6	1.28617	0.363081	0.0458837	0.654516
AL645608.1	1.28616	0.363074	0.000930047	0.283024
RABGEF1	1.28601	0.362902	0.0104146	0.489202
SPATA7	1.28548	0.362306	0.0279529	0.593469
LRRC41	1.28515	0.361934	0.0235971	0.570061
Z97353.1	1.2851	0.361883	0.00541849	0.428947
MCU	1.28491	0.361671	0.0317864	0.61138
ZNF576	1.28489	0.361648	0.0358757	0.627903
BTBD7	1.28476	0.361497	0.0227387	0.566485
AP001469.2	1.2847	0.36143	0.0383625	0.638286
FAM193A	1.28467	0.361395	0.0146636	0.518653
DR1	1.2846	0.361317	0.0197421	0.551754
MOK	1.28451	0.361218	0.0465049	0.657904
TMEM69	1.28437	0.361063	0.00816905	0.47044
RSBN1L	1.28423	0.360901	0.00604544	0.437378
GTF2H4	1.2841	0.360762	0.0368492	0.63202
AP001453.1	1.28407	0.360725	0.0149829	0.519962
SMIM27	1.28387	0.3605	0.0461207	0.655932
WNT3A	1.2835	0.360079	0.0259635	0.582969
ZNF837	1.28313	0.359669	0.0434626	0.649578
PSPC1	1.28291	0.359421	0.0446558	0.65296
CDKN2B.AS1	1.28285	0.359347	0.0422558	0.645267
HNRNPH3	1.28234	0.358784	0.00922966	0.483776
AC012358.2	1.28234	0.358773	0.0214724	0.561324
IQCC	1.28219	0.358615	0.0121531	0.502674
HMGN3.AS1	1.28208	0.358492	0.0326851	0.612796
AC097658.1	1.28203	0.358427	0.00907157	0.480326
EIF3F	1.28194	0.358332	0.0212784	0.561249
MEX3B	1.28185	0.358229	0.0212399	0.561249
AC007250.1	1.28182	0.35819	0.00850546	0.473249
DEGS1	1.28176	0.358129	0.0433329	0.649495
UROS	1.28171	0.35807	0.0273533	0.590463
GLTPD2	1.28161	0.357963	0.0247634	0.576424
FHDC1	1.28096	0.357231	0.0353417	0.62591
RASL10A	1.28077	0.357016	0.0316219	0.61138
CCR10	1.28068	0.356907	0.00696878	0.448619
RUFY2	1.2805	0.356711	0.0450845	0.654282
ARID4A	1.28041	0.356601	0.0162566	0.530045
FBXL12	1.2804	0.356596	0.0418928	0.644358
AC004623.1	1.2804	0.356594	0.0148142	0.518729
THAP8	1.2802	0.356364	0.0394816	0.640943
AC016876.3	1.28013	0.356288	0.0406267	0.643064
PSMA3.AS1	1.28012	0.356277	0.0416877	0.644358
NVL	1.28002	0.356169	0.0169667	0.535424
ZSCAN25	1.27999	0.356132	0.0269715	0.586862
AP5Z1	1.2799	0.356035	0.0371515	0.6333
AC040162.1	1.27973	0.355835	0.0411609	0.6434
AC005786.1	1.27972	0.355826	0.0492395	0.667878
EYA3	1.27963	0.355731	0.00313843	0.371512
AL161729.1	1.27956	0.355645	0.0126572	0.504127
PHIP	1.27943	0.355499	0.0227982	0.567288
CLTA	1.27934	0.355401	0.017747	0.536315
MEAK7	1.27898	0.354994	0.0216819	0.561324
MTBP	1.27881	0.354799	0.0489793	0.666603
FSCN2	1.27865	0.354626	0.0337795	0.618179
SIRT2	1.27852	0.354477	0.0365592	0.631637
SCMH1	1.27823	0.354143	0.00721316	0.450302
NSMCE4A	1.27814	0.354047	0.0259673	0.582969
GSK3A	1.27811	0.354009	0.0123405	0.503159
PSMD8	1.27805	0.353948	0.046325	0.657194
PPIH	1.27801	0.353897	0.0120424	0.500763
QTRT2	1.27793	0.353812	0.0362716	0.630081
TTC7B	1.2779	0.35377	0.0318666	0.61138
AC009121.2	1.27776	0.35362	0.00235513	0.345349
ZNF260	1.27755	0.353381	0.0290138	0.59885
AK4P1	1.27718	0.352966	0.0424555	0.645267
PFAS	1.2767	0.352417	0.016269	0.530142
EXOSC1	1.27642	0.352102	0.0317945	0.61138
ZNF460	1.27634	0.352013	0.0324246	0.612517
SPEN	1.27627	0.351938	0.044149	0.650743
RAD18	1.27627	0.351928	0.0395161	0.640943
AC099568.2	1.27622	0.351874	0.0325134	0.612552
JARID2.AS1	1.27619	0.351839	0.0300074	0.603712
HSF1	1.27607	0.351713	0.0302186	0.604168
PRPF38B	1.27604	0.351673	0.000919685	0.282913
NSUN5	1.27594	0.351559	0.0251562	0.577033
ABCE1	1.27586	0.351468	0.0317455	0.61138
TTC34	1.27579	0.351386	0.000165687	0.193215
DHX36	1.27567	0.351257	0.017895	0.537585
AC110771.1	1.27563	0.351205	0.032584	0.612552
RPL7AP11	1.27555	0.351123	0.0173138	0.536097
AC025166.1	1.27538	0.350932	0.00503384	0.420865
BTBD2	1.27537	0.350916	0.0288713	0.59885
LUC7L2	1.27521	0.350731	0.002705	0.358568
ZNF732	1.27517	0.350693	0.0440081	0.650718
AL023806.1	1.27483	0.350309	0.00615088	0.437751
HNRNPA3P5	1.27454	0.349971	0.0042051	0.400809
FUS	1.27448	0.349913	0.0225485	0.565527
AL731566.1	1.27422	0.349619	0.0193804	0.548483
AL121583.1	1.27421	0.349605	0.0396811	0.641622
AL157392.3	1.27408	0.34946	0.0275498	0.591793
MAPK1IP1L	1.27366	0.348982	0.02007	0.554958
AC104333.3	1.27352	0.348823	0.0324001	0.612517
TIMM29	1.2734	0.348681	0.0433517	0.649495
AC023632.2	1.27328	0.348547	0.00602985	0.437378
KHDRBS1	1.27303	0.348266	0.00480194	0.415707
ZNF587	1.27302	0.348254	0.0159854	0.52641
TMEM39A	1.27292	0.348147	0.0361765	0.629018
AC015977.2	1.27285	0.348062	0.0416462	0.644236
SURF4	1.27284	0.348056	0.0392462	0.640254
NACC1	1.27283	0.348036	0.0245916	0.575739
ABI1	1.27277	0.347968	0.0229773	0.567819
AC004846.1	1.2726	0.347778	0.0222911	0.564322
AC134682.1	1.27236	0.347511	0.00465122	0.41218
CWF19L1	1.27199	0.347087	0.010204	0.487551
CLCN6	1.27195	0.347045	0.0282322	0.595158
AC005593.1	1.2718	0.34687	0.020969	0.560664
POLR3A	1.27161	0.346659	0.0285994	0.598683
CDC37	1.27156	0.3466	0.0179337	0.537585
NUTM2B.AS1	1.27156	0.346599	0.0214253	0.561249
NPM1P6	1.27092	0.34587	0.0142205	0.515731
ZNF611	1.27049	0.345382	0.00813435	0.47033
NTN3	1.27049	0.34538	0.00405359	0.398597
TTC3	1.27039	0.345271	0.0401909	0.642082
DCAF5	1.27032	0.345198	0.00925063	0.483776
TAF12	1.27012	0.344966	0.0148779	0.518864
PRORSD1P	1.27004	0.344871	0.0165544	0.534213
[truncated: 2,232 more rows]

## Sheet: BLCA
Differentially expressed genes (DEGs) between the low-HPDL subgroup and the high-HPDL subgroup in BLCA
	fc	log2fc	pvalue	padj
HPDL	12.3564	3.62718	3.95071e-112	2.23618e-107
LINC01980	3.79779	1.92516	5.23633e-11	1.55993e-07
CRH	3.67542	1.87791	2.7458e-06	0.000652939
EPHX3	3.41245	1.77081	5.20762e-09	6.27152e-06
KRT14	3.25455	1.70246	0.00122143	0.0392527
GAL	3.17874	1.66846	8.1622e-12	3.84997e-08
PRAME	3.1527	1.65659	1.11863e-09	1.86226e-06
KRT6A	3.07404	1.62014	0.00416502	0.0839261
RNU6.140P	3.04263	1.60532	9.15528e-13	7.40296e-09
RPL39L	3.00899	1.58928	2.17612e-11	7.69829e-08
DSC3	2.952	1.56169	4.83981e-05	0.0047976
CD320	2.95002	1.56073	7.76852e-19	2.19857e-14
MAGEA4	2.82766	1.49961	7.54218e-06	0.00133888
AC025575.2	2.81045	1.4908	3.74666e-07	0.000155933
TSPYL5	2.78634	1.47837	2.94638e-10	6.9488e-07
GRIN2D	2.75016	1.45951	7.60361e-11	2.04943e-07
CGREF1	2.65726	1.40994	1.44119e-12	1.01968e-08
TCF15	2.62006	1.3896	8.10352e-16	1.52892e-11
AC132807.2	2.56888	1.36114	6.92654e-11	1.96028e-07
KRT4	2.55143	1.3513	0.000677703	0.0264547
VPS9D1.AS1	2.50852	1.32683	1.03066e-13	1.16675e-09
HOXC9	2.47396	1.30682	3.90955e-10	8.19586e-07
KRT5	2.44593	1.29038	0.0167415	0.185731
S100A7	2.40458	1.26578	0.0123431	0.157565
VAX2	2.39295	1.25879	4.21242e-14	5.96078e-10
TBX1	2.37438	1.24755	6.0883e-06	0.00113162
OAT	2.36902	1.24429	1.66741e-09	2.55077e-06
UCHL1	2.35464	1.23551	3.67781e-06	0.000802352
KRT1	2.35332	1.2347	0.000324982	0.0164625
DSG3	2.31812	1.21295	0.0020646	0.0546298
AP001207.3	2.29584	1.19902	3.85799e-06	0.000830305
PLEKHG4	2.29555	1.19884	2.50226e-11	7.9959e-08
BARX1	2.29298	1.19722	2.94237e-07	0.000132178
VANGL2	2.28722	1.1936	1.87345e-07	9.3855e-05
AC006329.1	2.25207	1.17125	7.65316e-08	4.90044e-05
HSPA1A	2.22003	1.15058	1.10263e-06	0.000321707
KRTDAP	2.21068	1.14449	0.00451549	0.0882853
LY6K	2.20407	1.14017	4.17369e-08	3.14986e-05
SNX31	2.18071	1.1248	0.00453938	0.0883713
LINC02575	2.1688	1.1169	3.53351e-06	0.000781399
HIST1H2BG	2.16809	1.11643	8.23505e-08	5.06653e-05
LGALS7B	2.16398	1.11369	0.000699628	0.0270123
B4GALNT4	2.16325	1.1132	1.51247e-05	0.00214559
HOXC10	2.163	1.11304	8.33383e-07	0.000271099
HORMAD1	2.14649	1.10198	1.5666e-08	1.50293e-05
SLC6A11	2.14375	1.10013	8.60761e-08	5.18306e-05
RSPO4	2.13839	1.09653	2.52161e-07	0.000116697
AC112206.3	2.137	1.09559	3.1882e-07	0.000139331
AL049870.3	2.13537	1.09449	6.22683e-07	0.000221667
HIST1H2AE	2.135	1.09423	1.64363e-07	8.86025e-05
PRSS21	2.09046	1.06382	1.18314e-05	0.00182231
HOXC.AS1	2.07278	1.05157	3.61803e-10	7.87646e-07
NINL	2.0662	1.04698	5.32412e-10	1.07627e-06
TRPM2.AS	2.05617	1.03996	7.59077e-07	0.000259291
TLX3	2.05606	1.03988	2.54278e-11	7.9959e-08
CCNI2	2.05537	1.0394	2.12838e-08	1.82531e-05
LINC00958	2.05482	1.03901	0.000259304	0.0142496
FAM50B	2.04576	1.03263	4.15104e-09	5.46412e-06
SPRR1B	2.04263	1.03042	0.0152218	0.17739
SIX2	2.04053	1.02894	3.59508e-05	0.00390573
C1QTNF12	2.03747	1.02678	2.2486e-12	1.27275e-08
MPV17L	2.03661	1.02617	2.23278e-12	1.27275e-08
PLTP	2.02047	1.01469	3.31811e-08	2.76194e-05
HIST1H2BH	2.01238	1.0089	1.19511e-05	0.00182875
PTH2R	1.99692	0.997777	3.86078e-07	0.00015951
LINC02041	1.99023	0.992935	7.99948e-06	0.00138892
FGFBP1	1.98038	0.985775	0.0127127	0.160403
HOXC4	1.98013	0.985593	2.28003e-08	1.92619e-05
FOXE1	1.97647	0.982925	1.87372e-07	9.3855e-05
LINC01006	1.95143	0.964531	1.62317e-11	6.12498e-08
NUPR2	1.9384	0.95487	7.54572e-06	0.00133888
NLRP2	1.93836	0.954839	0.00656543	0.109621
AC104041.1	1.93523	0.952506	1.47553e-09	2.31994e-06
AC105460.1	1.93367	0.951344	0.000670346	0.0262525
CLEC2L	1.93258	0.950531	1.77832e-07	9.23456e-05
RF00432.5	1.92845	0.947438	4.15578e-07	0.000168018
XCL1	1.92806	0.947151	1.71746e-07	9.13818e-05
KLRG2	1.92624	0.945786	1.27778e-10	3.25343e-07
CDCA7L	1.92411	0.944192	3.58832e-06	0.000787234
PKP1	1.92248	0.942971	0.00260003	0.0631889
AL162413.1	1.92248	0.942965	0.000983009	0.0338935
BX284668.5	1.91198	0.935068	5.19936e-06	0.00103625
GPX2	1.90824	0.932243	0.0325824	0.262674
BAIAP2L2	1.90688	0.931217	3.40515e-06	0.000765705
AADAC	1.90644	0.93088	0.000916217	0.0322711
FABP5	1.90375	0.928842	0.00013019	0.00903064
CTAG2	1.90173	0.927312	0.00572023	0.101275
G2E3.AS1	1.89593	0.922903	1.56958e-11	6.12498e-08
KRT6C	1.89147	0.919507	0.00699814	0.113077
TP63	1.88955	0.918042	0.0012089	0.0390559
GPR27	1.88904	0.917654	1.14003e-05	0.00178583
CLCA4	1.88808	0.916919	0.0107488	0.145482
MAGEA1	1.87834	0.909456	0.0004731	0.0210688
PM20D1	1.87771	0.908973	0.0370874	0.279635
AF127577.3	1.87704	0.90846	8.60358e-07	0.000273971
ARL9	1.8732	0.905506	1.88077e-08	1.71702e-05
SMO	1.8678	0.901339	1.2311e-06	0.000351932
AKR1E2	1.86492	0.899118	6.71792e-08	4.4735e-05
SERPINB13	1.86464	0.898894	0.00242344	0.0603482
MAGEA3	1.85068	0.888056	0.0215904	0.214208
GSTA4	1.84932	0.886993	2.16499e-07	0.000105641
UGT1A10	1.84606	0.884451	0.0105747	0.144249
HOXC11	1.84396	0.88281	1.19506e-08	1.18672e-05
SULT4A1	1.8429	0.881976	1.48681e-07	8.27806e-05
LINC00491	1.84241	0.881593	1.43118e-08	1.39668e-05
C10orf99	1.84147	0.880859	0.0391381	0.288112
PNMA5	1.82612	0.868782	0.00083662	0.0302971
HOXD13	1.82447	0.867479	3.61452e-05	0.00391933
WDR72	1.81643	0.861105	0.000235191	0.0134005
FGFR4	1.81275	0.858183	4.84601e-08	3.51659e-05
PNCK	1.81027	0.856208	0.000950052	0.0332148
BX284668.4	1.80993	0.855936	7.52163e-07	0.000259291
GATM	1.80794	0.854347	0.000235574	0.0134005
EIF4EBP3	1.80503	0.852025	4.33693e-09	5.57906e-06
PYY2	1.8018	0.849442	1.1543e-06	0.000333347
TEAD2	1.80145	0.849157	3.29755e-05	0.00363128
RNA5SP18	1.80027	0.848214	1.94041e-06	0.000496974
PRRT3.AS1	1.7998	0.847835	8.21955e-10	1.50078e-06
LINC02163	1.79832	0.84665	2.0807e-08	1.82531e-05
AFAP1.AS1	1.79612	0.844888	7.17125e-05	0.00614081
SOX7	1.79266	0.842099	5.03294e-06	0.00100662
SOX15	1.79017	0.8401	0.00495264	0.09304
SPRR2A	1.78957	0.839611	0.0210729	0.211596
AC131532.1	1.7892	0.839318	7.17484e-06	0.00128516
SBSN	1.78786	0.838235	0.021048	0.211496
LINC02315	1.7876	0.838025	0.000106125	0.00800917
NDUFA4L2	1.78592	0.836667	0.000687186	0.0266594
RASGEF1A	1.78532	0.836182	2.1383e-06	0.000537108
KRTCAP3	1.78409	0.835192	0.00029559	0.0155348
HOXC8	1.78343	0.834654	2.65132e-09	3.80533e-06
GALR2	1.78066	0.832416	3.49096e-08	2.83538e-05
CASC9	1.77934	0.83134	0.000105809	0.00800668
APBA2	1.77651	0.829042	1.11528e-06	0.00032373
TCAM1P	1.77478	0.82764	1.09337e-06	0.000321707
CENPV	1.77241	0.825713	7.05626e-06	0.00127603
CAPNS2	1.77209	0.825451	0.0212599	0.212514
EEF1A2	1.77207	0.825437	0.0297809	0.25092
SNHG19	1.77014	0.823864	3.86771e-08	3.08338e-05
POU6F2.AS2	1.76915	0.823056	1.08646e-06	0.000321707
ALOX12	1.7631	0.818114	2.36939e-05	0.00290916
ADH7	1.76002	0.815592	0.00166719	0.0478045
C12orf56	1.75873	0.814535	6.44351e-12	3.31559e-08
WDR66	1.7521	0.809083	4.03031e-08	3.10854e-05
MAGEA9B	1.74614	0.804173	7.73811e-05	0.00649841
AC100801.1	1.74441	0.802739	9.02929e-06	0.00149876
HIST1H3G	1.74196	0.800711	5.74412e-07	0.000209181
HOXC13	1.74065	0.799626	3.98085e-05	0.00414465
NXPH4	1.73478	0.794754	0.000836407	0.0302971
AKR1C2	1.7341	0.794189	0.0199447	0.205144
ZNF518B	1.7319	0.792353	5.84797e-10	1.10336e-06
AC019171.1	1.7288	0.789775	5.71586e-10	1.10336e-06
MAGEA4.AS1	1.72753	0.788712	1.89579e-05	0.00250632
LINC00839	1.7273	0.788517	0.000445078	0.0203492
COL28A1	1.72291	0.784844	8.10945e-08	5.04408e-05
FGFR3	1.72288	0.784819	0.0102729	0.141564
PTHLH	1.72245	0.784462	0.00815941	0.123343
AC109454.3	1.72237	0.784398	5.76014e-06	0.00109408
NKX2.8	1.72176	0.783884	1.72248e-06	0.000458428
GTSF1	1.71882	0.78142	0.0016198	0.0468493
GALNT14	1.71861	0.781238	0.000378299	0.0183096
CHP2	1.71709	0.779963	0.00434231	0.0862081
EN1	1.71473	0.777979	4.51662e-05	0.00454085
IGF2BP1	1.7088	0.772983	8.12648e-05	0.0067003
FBXO17	1.70649	0.771029	1.9398e-06	0.000496974
CCDC162P	1.7005	0.76596	7.82231e-07	0.000260446
CDIP1	1.69822	0.764025	1.53066e-06	0.00041653
CA2	1.6947	0.761027	0.00213041	0.0555693
DSG1.AS1	1.69438	0.760758	1.32202e-10	3.25343e-07
GJB6	1.69274	0.759359	0.0137723	0.167242
AL513318.2	1.69247	0.759128	0.000311233	0.0160424
AL031736.1	1.68986	0.756905	7.38659e-08	4.8057e-05
ECHDC3	1.68886	0.756048	0.000462185	0.0208513
ACTL8	1.68648	0.754013	3.97982e-06	0.000843691
TMEM246	1.68191	0.750104	4.25913e-05	0.0043462
IRX3	1.67715	0.746008	0.00441493	0.0872231
SPRR2E	1.67405	0.743341	0.0184772	0.195962
TNNI3	1.67303	0.742466	3.18173e-05	0.00354512
KLK13	1.67286	0.742319	0.000550826	0.0231325
FAM78B	1.67228	0.741816	0.000192594	0.0117597
FABP5P7	1.67134	0.741008	0.000507413	0.0220758
AL645608.3	1.6676	0.737771	8.76736e-05	0.00703038
TUBB4A	1.6666	0.736912	4.58111e-07	0.000176395
DEFB126	1.662	0.732917	3.23631e-05	0.0035918
PODXL2	1.65628	0.727947	0.00180072	0.0501348
EPHX2	1.65554	0.727304	5.67983e-06	0.00108393
GIPC2	1.65412	0.726063	9.54655e-05	0.00743181
LINC01234	1.65005	0.72251	6.8577e-05	0.00599326
PYCR1	1.64931	0.721865	0.000119893	0.00862288
TUBB6	1.64895	0.721546	0.00054476	0.0230038
TSPEAR.AS2	1.64882	0.721436	1.42814e-05	0.00206213
CRNDE	1.64156	0.715072	3.8163e-05	0.00406034
PON3	1.6386	0.712467	1.70048e-08	1.57788e-05
AC010643.1	1.6367	0.710789	4.34622e-07	0.000170729
KIF1A	1.63599	0.710162	3.26585e-05	0.00361042
MRPS21	1.63545	0.709689	1.22776e-11	5.34568e-08
IGSF11	1.63387	0.70829	3.31224e-07	0.000143114
ZFP3	1.63163	0.706317	2.0688e-07	0.000101825
CYCSP6	1.6315	0.7062	9.5586e-05	0.00743181
TFAP2E	1.63006	0.704923	7.24856e-09	8.20566e-06
PAX8.AS1	1.62826	0.703331	9.0798e-05	0.00718952
SPINK5	1.62591	0.701248	0.00192527	0.0520908
MAP1LC3A	1.62575	0.701103	1.89108e-05	0.00250632
SPRR2D	1.62022	0.69619	0.033408	0.265921
RYR1	1.62011	0.696092	1.08458e-06	0.000321707
AL132712.1	1.61758	0.69384	1.40642e-05	0.00205171
MAGEA10	1.61653	0.692902	0.0183326	0.195114
KCNMB2.AS1	1.61308	0.68982	8.35894e-05	0.00678471
MAGEA11	1.61285	0.689612	0.000241085	0.013578
AC011287.1	1.61141	0.688328	6.30718e-07	0.000223124
FOXF2	1.61106	0.688009	7.32367e-05	0.00623515
ADRA2C	1.60857	0.685781	0.00179426	0.0500022
NTS	1.60747	0.68479	0.00319408	0.0715438
LRFN1	1.60662	0.68403	6.14336e-07	0.00022008
NUDT11	1.60496	0.682534	2.27214e-05	0.00282034
IRX2	1.60278	0.680575	0.000159803	0.010411
MSMB	1.60202	0.679892	0.0421045	0.298101
TMEM52	1.60111	0.679068	2.62077e-05	0.00313617
NMNAT3	1.59982	0.677914	6.45375e-06	0.00117837
DLL3	1.59769	0.675989	5.44053e-07	0.000201271
TRPM2	1.59662	0.675018	2.68609e-05	0.00318071
TOX3	1.59598	0.674446	0.0308259	0.254717
DUXAP8	1.59487	0.67344	4.18435e-06	0.000876568
SLC7A5	1.59454	0.673142	0.000841302	0.0303889
DMRTA2	1.59419	0.672828	0.00041862	0.0195018
CT83	1.59382	0.672488	0.00191155	0.0518436
SEMA6A	1.59235	0.671157	0.00199911	0.0534958
OPLAH	1.59147	0.670361	1.50909e-05	0.00214559
CPT1C	1.59134	0.670246	9.96468e-06	0.00162038
BAALC	1.59086	0.66981	0.000241366	0.0135803
PCSK9	1.59074	0.669702	0.00126419	0.0400871
HS6ST2	1.58891	0.66804	0.00208033	0.0547454
AC011632.1	1.58874	0.667881	2.66086e-05	0.00317073
IL20RB	1.58859	0.667749	0.0176609	0.190875
PSAT1	1.58833	0.667511	5.47375e-06	0.00106104
BCL11A	1.58817	0.667363	7.08622e-05	0.00611882
EPOP	1.58752	0.666776	9.9842e-06	0.00162038
FAM131C	1.5868	0.666121	4.7931e-07	0.00018208
BCL2L10	1.57807	0.658162	8.86819e-05	0.00706982
FOXP4.AS1	1.57753	0.657666	1.10069e-08	1.11252e-05
HIST1H4H	1.57476	0.655132	0.00190216	0.0516697
DMRT2	1.57377	0.654221	4.89224e-05	0.00484109
SLC16A1	1.57272	0.653262	0.00768523	0.11869
GLDC	1.57185	0.65246	0.0139862	0.168939
AC025244.1	1.57158	0.652216	5.94845e-08	4.10603e-05
STC2	1.57077	0.651469	5.61383e-05	0.00524346
KRT75	1.57045	0.651181	0.00217994	0.0564448
HOXC6	1.57031	0.651053	6.32546e-05	0.00568307
LINC02428	1.57008	0.650834	2.12519e-05	0.00267311
FZD9	1.57002	0.650784	7.23511e-13	6.82536e-09
F12	1.56996	0.650725	6.14672e-05	0.00558454
HSPA2	1.56958	0.65038	8.19376e-05	0.00672149
IRX5	1.56762	0.648573	2.7942e-05	0.00326772
TMEM171	1.56725	0.648237	0.000114793	0.00840556
PCSK1N	1.56717	0.648164	0.00884446	0.129291
TDRD5	1.56608	0.647155	0.000307477	0.0159614
MEST	1.56597	0.647057	0.00484677	0.0918797
ALDH2	1.56418	0.645402	0.000240694	0.0135695
METTL7B	1.56324	0.644543	0.00247347	0.0611904
IQCA1	1.56286	0.644191	2.00232e-05	0.00256654
M1AP	1.56242	0.643783	3.43209e-07	0.000147047
AL031602.1	1.56201	0.643403	7.66155e-07	0.000259291
MAPK15	1.5617	0.643116	0.000397497	0.018855
SLC7A4	1.56001	0.641551	0.00850578	0.126532
AL645608.6	1.55981	0.641374	3.71399e-05	0.00397773
SOX2	1.55908	0.640692	0.0256273	0.234225
SLC1A6	1.55684	0.638617	0.0359122	0.274875
RASIP1	1.55398	0.635967	9.73989e-05	0.007546
LINC01807	1.55239	0.634491	0.000128289	0.00894263
CCN6	1.55153	0.633688	0.0019664	0.0529004
GRHL3	1.54944	0.631746	0.045086	0.307502
AC016747.1	1.54894	0.63128	8.85031e-06	0.0014818
NKAIN2	1.54731	0.629766	1.97315e-05	0.0025557
FAM183A	1.54614	0.628671	0.000480235	0.0212528
CYP2S1	1.54604	0.628575	0.00697726	0.112901
AMN	1.54604	0.628573	7.77401e-05	0.00651888
EIF5A2	1.54589	0.628437	2.75701e-06	0.000652939
LAPTM4B	1.5457	0.628257	1.85675e-06	0.000482091
AC114956.2	1.54565	0.628214	1.09494e-06	0.000321707
HCG11	1.54551	0.628083	8.54534e-05	0.00689991
DYNC1I1	1.54531	0.627894	0.000144245	0.00971968
TSPEAR.AS1	1.54408	0.626743	4.53629e-05	0.00454448
AC010789.1	1.54221	0.624998	0.00106446	0.0359062
EVC2	1.54088	0.623759	8.18855e-07	0.0002684
WNK2	1.53826	0.621297	0.000543936	0.0230038
CHCHD10	1.53757	0.620652	6.14229e-06	0.00113616
HOXD11	1.53754	0.62062	0.00164547	0.0473257
AC112206.4	1.53616	0.619328	0.000132325	0.00912284
CCT2	1.53593	0.61911	5.76522e-07	0.000209181
POU3F1	1.5348	0.61805	0.00796694	0.121404
C19orf81	1.53314	0.616494	3.79358e-09	5.11249e-06
HCG4	1.53082	0.6143	2.61599e-05	0.00313617
CNTFR	1.53064	0.614132	0.000599418	0.0243913
SLC38A4	1.53032	0.613835	0.0204701	0.208166
HIST1H3H	1.5301	0.613625	0.00321314	0.071772
LINC00392	1.52888	0.612476	0.000184248	0.0114728
AL162574.2	1.5282	0.611832	0.000135876	0.00932225
MYC	1.52707	0.610769	0.00229006	0.0582572
PEG10	1.52557	0.609351	0.0330856	0.264919
RF01210.24	1.5238	0.607678	0.000277377	0.0148619
SLC10A4	1.52315	0.60706	0.000101045	0.0077814
CKMT1A	1.52209	0.606049	0.000277797	0.0148619
CPNE7	1.51961	0.603706	0.00129213	0.0406751
RPSAP71	1.51667	0.600906	3.66392e-05	0.0039438
GFRA3	1.51634	0.600593	0.000694437	0.0268671
PRKCQ.AS1	1.5163	0.600551	1.90539e-05	0.00250632
ZYG11A	1.51531	0.599617	2.61473e-07	0.000119354
MSI1	1.51437	0.598718	0.00597253	0.10373
HIST1H4E	1.51372	0.598101	0.00134557	0.0417785
NRSN2	1.51293	0.597345	0.000169818	0.0108122
TMEM163	1.51253	0.596963	0.00362429	0.077218
AC010735.2	1.51249	0.596929	0.00107294	0.0361708
RRS1	1.51231	0.596755	3.37767e-10	7.6473e-07
AC009065.5	1.50981	0.594366	3.71758e-05	0.00397773
SLC6A15	1.50962	0.594183	1.28795e-07	7.29003e-05
ATP6V1B1	1.50943	0.594006	0.00248906	0.0614417
SPRR2C	1.50858	0.593193	0.0169483	0.187073
SRRM3	1.50847	0.593085	0.000238056	0.0134476
CDC20	1.50755	0.592205	2.63135e-05	0.00314219
CCNJ	1.50748	0.592135	3.87665e-06	0.00083116
ORC6	1.50716	0.591835	8.33212e-08	5.07113e-05
DLX5	1.50674	0.591433	0.00793705	0.121125
HIST1H3E	1.5053	0.590053	0.000129433	0.00898919
RF02246	1.50496	0.589726	0.0295129	0.250073
NRARP	1.50456	0.589337	0.00241737	0.0602236
LINC01143	1.5043	0.589091	1.90445e-09	2.83673e-06
DPYSL4	1.50381	0.588621	0.00190513	0.0516942
ZNF300	1.50245	0.587316	0.00266307	0.0641154
ARL10	1.50239	0.587263	8.68386e-09	9.10229e-06
YDJC	1.50128	0.586193	9.35886e-10	1.65541e-06
HS3ST6	1.50065	0.585585	0.0378065	0.282982
DOC2B	1.50019	0.585141	0.000228358	0.0132298
KCTD15	1.49895	0.583955	0.000575954	0.0238358
GSC	1.49735	0.582413	5.63498e-06	0.00108119
FADS2	1.49663	0.581717	0.00863363	0.127626
IRX4	1.4945	0.579661	0.000231827	0.0133217
CKMT1B	1.49358	0.578777	0.000685937	0.0266292
LINC00709	1.4935	0.578702	0.000390444	0.0186937
NUF2	1.49297	0.578186	2.45511e-05	0.00297568
LINC01456	1.49265	0.577878	0.000243231	0.0136311
PCAT7	1.49239	0.577622	0.000559723	0.0233984
FKBP1B	1.49194	0.577194	0.00100041	0.0342975
RPP25	1.48973	0.575047	3.17395e-05	0.00354343
ERVMER34.1	1.48872	0.574069	0.000460968	0.0208274
AC093702.1	1.48598	0.571419	1.03011e-05	0.00165173
LINC02542	1.48574	0.571178	0.000192219	0.0117494
PABPC1	1.48573	0.571169	8.7657e-05	0.00703038
AC005993.1	1.48529	0.570746	0.00167406	0.0479287
AC009065.2	1.48513	0.570593	2.84404e-05	0.00331231
LINC00967	1.48435	0.569831	0.0112479	0.14952
TRPV4	1.48356	0.569065	0.000460466	0.0208274
AC023034.2	1.48346	0.568963	4.93672e-05	0.00485996
AC093895.1	1.48316	0.568671	1.77582e-05	0.00239322
LINC00393	1.48286	0.568381	6.46755e-05	0.00577407
FSCN1	1.481	0.566567	0.00316574	0.0712191
HIC2	1.48036	0.565944	0.00169854	0.0483559
ZNF556	1.48001	0.565605	1.99897e-06	0.000509666
SYNGR3	1.47931	0.564926	3.67193e-05	0.0039438
LRFN4	1.47874	0.564366	0.0012235	0.0392527
CIART	1.47872	0.564347	0.000489805	0.0214873
SLC10A6	1.47828	0.563915	0.000665858	0.0261665
AL645608.7	1.47806	0.563702	0.00254991	0.0623726
CITED4	1.47674	0.562416	0.00195054	0.0525709
NEFH	1.47656	0.562239	0.000230575	0.0132767
CLDN10	1.47583	0.56153	7.09174e-06	0.00127836
CERS4	1.47522	0.560935	0.00523951	0.0961318
PTPN20	1.47258	0.558341	7.87267e-05	0.00656272
HEY1	1.4721	0.557875	0.000987564	0.0339393
SEMA4G	1.47164	0.557422	0.000166806	0.0107047
BCL11B	1.47136	0.557147	0.00078957	0.0291718
AKR7A3	1.47091	0.556708	4.08442e-07	0.000167526
FAM90A1	1.46959	0.55541	6.69467e-06	0.00121452
AL132712.2	1.46923	0.55506	0.000808362	0.0296148
PCDHB11	1.46881	0.554644	0.000265153	0.0144448
OLFM2	1.46874	0.554581	0.00436924	0.0865619
NETO2	1.46836	0.554208	0.000770362	0.0286474
MINCR	1.46817	0.554023	0.000191898	0.0117425
AC119150.1	1.46785	0.553709	3.37565e-05	0.00370288
BNC1	1.46654	0.552417	0.0379475	0.283627
AL671883.1	1.4655	0.551397	4.42176e-05	0.00446133
GTF2IRD2P1	1.46493	0.550829	1.12686e-07	6.50844e-05
MAP9	1.46425	0.550165	2.93274e-05	0.00338773
AC112907.2	1.46402	0.549936	7.64508e-05	0.00644898
BEX2	1.46091	0.546866	0.00526786	0.0964332
MAGEA9	1.46013	0.546097	4.4978e-05	0.00452997
HSD11B2	1.46007	0.54604	0.00116762	0.0383128
NHLRC1	1.45928	0.545252	9.53019e-06	0.00157727
PNLDC1	1.45787	0.543863	0.000114256	0.00837706
HIST1H2AI	1.45787	0.54386	0.00136135	0.0420809
TEX45	1.45656	0.542565	0.00169923	0.0483559
HIST3H2A	1.45537	0.541389	0.000321065	0.016372
FAR2P1	1.45525	0.541272	0.000670668	0.0262525
AL513123.1	1.45515	0.541171	3.48751e-06	0.000777167
DIRAS1	1.455	0.54102	0.000955895	0.0333162
GPX7	1.45466	0.540686	0.000834549	0.0302932
DDN	1.45366	0.539688	6.35932e-08	4.33675e-05
SNHG25	1.4535	0.53953	6.74487e-05	0.00591896
HOXC13.AS	1.45342	0.539454	0.0028143	0.0663452
MTCO1P40	1.45329	0.539326	0.0242806	0.228576
RBP1	1.4532	0.539235	0.0184089	0.19542
SLC12A9.AS1	1.45288	0.538911	3.20144e-06	0.000727742
AL034346.1	1.45248	0.538523	6.01373e-07	0.000216808
H2BFWT	1.4506	0.536647	8.20893e-06	0.00141229
PDLIM4	1.45018	0.536233	0.00925822	0.133071
SEC14L4	1.44899	0.535052	0.000213481	0.0126528
CASC19	1.44874	0.534794	0.000751295	0.0281995
FAR2	1.44771	0.53377	0.00421609	0.0846295
MUCL1	1.44655	0.532614	0.0130469	0.162714
LINC01518	1.44618	0.532243	0.0331555	0.265179
SDR16C5	1.4461	0.532168	0.0248782	0.231262
AL589843.1	1.4458	0.531864	5.88179e-05	0.00543101
ALDOC	1.44552	0.531585	0.00239571	0.0598421
SLC27A5	1.44547	0.531537	7.63582e-07	0.000259291
PNMA3	1.44451	0.530583	1.91194e-06	0.000494153
AC005831.1	1.44404	0.530113	0.00229877	0.0584262
AGAP2.AS1	1.44347	0.529539	0.00108955	0.0364485
RAP1GAP	1.44303	0.529099	0.0120958	0.155494
FBXO27	1.44217	0.52824	0.0232568	0.223646
AC010168.1	1.44085	0.526921	1.07148e-05	0.00169881
ZNF502	1.44	0.526064	0.000105603	0.00800177
NPW	1.43899	0.525058	5.51435e-05	0.00519816
ALDH7A1	1.43832	0.524381	0.0270707	0.240467
HBQ1	1.43654	0.522601	1.41552e-05	0.00205225
DUSP5P1	1.4361	0.522157	2.09038e-05	0.00264697
AC117402.1	1.43589	0.521941	1.22391e-05	0.00185726
DSCR8	1.43581	0.521864	0.0408115	0.293522
C10orf82	1.4349	0.520951	0.000189324	0.0116506
PARVB	1.43452	0.520572	0.000495991	0.0216788
CEP41	1.43343	0.519475	5.07935e-08	3.63926e-05
AC087783.2	1.43317	0.519207	0.00303536	0.0693051
SLC6A8	1.43296	0.518997	0.0102844	0.141601
SYN2	1.432	0.518035	0.000214677	0.0126971
LINC01564	1.43193	0.517966	0.00946538	0.134782
PBK	1.43186	0.517894	9.10031e-05	0.00718952
HOXD10	1.43076	0.516781	0.0078709	0.120475
GABRR1	1.4304	0.516417	2.34957e-06	0.00057773
FSD1	1.4299	0.515918	0.0161493	0.183146
TP73.AS1	1.42877	0.514776	0.000153334	0.0101747
GAREM2	1.42828	0.514278	4.53419e-05	0.00454448
LINC00884	1.42793	0.513924	3.03226e-09	4.18614e-06
AC099487.1	1.42764	0.513633	3.0638e-06	0.000707826
YBX2	1.4268	0.512783	0.000413337	0.0193834
ADD2	1.42617	0.512143	0.000325125	0.0164625
AP000525.1	1.42601	0.511982	0.000462875	0.0208596
TTLL12	1.4257	0.511668	5.56517e-09	6.42857e-06
MEX3A	1.42521	0.511179	0.0124048	0.15802
AC068987.4	1.42468	0.510641	2.61509e-05	0.00313617
COX6C	1.42423	0.510179	6.55399e-07	0.000230416
FMO8P	1.42405	0.509995	0.0113367	0.15006
SHCBP1	1.42305	0.508988	7.81593e-06	0.0013739
FST	1.42298	0.508919	0.032147	0.260872
ODC1	1.42267	0.5086	0.000764723	0.0284956
CCNB1	1.4221	0.508018	2.75293e-05	0.00323281
C5orf38	1.421	0.506911	0.00577024	0.101778
AC096759.2	1.41989	0.505775	5.31391e-06	0.00104801
AP005019.1	1.41949	0.505373	0.000124077	0.00878977
SPDYC	1.41917	0.505049	0.00852102	0.126623
HIST1H3B	1.41899	0.504865	0.0023156	0.0587381
UBE2C	1.41843	0.504297	0.000117836	0.0085494
AC068647.2	1.41822	0.504085	0.0053136	0.096957
TNFRSF18	1.41804	0.503895	0.0136044	0.166422
STEAP1B	1.41766	0.503511	0.00371961	0.0782844
DIPK1B	1.41758	0.50343	0.000385538	0.0185248
NIPAL4	1.41737	0.503211	0.0433947	0.302186
AC007490.1	1.4172	0.50304	0.0182455	0.194561
RPL10P9	1.41655	0.502383	0.0349124	0.270997
NINJ2	1.41622	0.502044	0.000235045	0.0134005
RF00096.18	1.41508	0.500886	0.00130963	0.0410453
SMKR1	1.41495	0.50075	0.00271724	0.0649693
ADAM11	1.41463	0.500422	4.64976e-05	0.00464172
DPPA2	1.41454	0.500329	2.31851e-05	0.00285935
SNHG17	1.41421	0.499993	1.61489e-07	8.78904e-05
HIST1H2AJ	1.41323	0.498997	1.01805e-05	0.0016417
HIST1H2BM	1.41302	0.498779	7.7418e-07	0.000259291
FUOM	1.41298	0.498736	0.00269214	0.064596
PRR7	1.41259	0.498338	7.26235e-05	0.00620942
DZIP1	1.41071	0.496422	0.000189366	0.0116506
FBXO2	1.40808	0.493729	0.0229379	0.222013
AL137803.1	1.40795	0.493591	0.000196	0.0119034
ZFP42	1.40711	0.492732	0.000524767	0.0226566
HOXD4	1.40696	0.492582	0.000637296	0.0253316
SYT1	1.40643	0.492041	0.00356512	0.0764643
RPL41P1	1.40594	0.491538	0.000330173	0.0166152
LINC00649	1.4049	0.490469	6.22251e-06	0.00114294
AL442663.4	1.40483	0.490392	3.93005e-06	0.000839429
C6orf141	1.40458	0.490134	0.0149093	0.175228
BOP1	1.40442	0.489974	3.1534e-07	0.000139331
CASC22	1.40386	0.489404	0.0134194	0.165267
AC114956.1	1.40345	0.48898	1.23929e-05	0.00187057
MS4A15	1.40265	0.488154	0.00900377	0.130782
AC099518.6	1.40206	0.487548	0.0017187	0.0486408
HIST1H4K	1.40198	0.487467	7.09829e-05	0.00611882
DSG1	1.40191	0.487396	0.0426139	0.299706
SLC13A3	1.40007	0.485499	0.00144571	0.0438297
C11orf53	1.39907	0.484466	0.0476497	0.316335
PTPRZ1	1.39892	0.484311	0.0155939	0.180037
AP001065.2	1.39865	0.484034	0.000159837	0.010411
SLC43A1	1.39861	0.483995	0.000758318	0.0283316
PNMA6A	1.39801	0.483378	2.41713e-05	0.00294858
EFCAB1	1.39771	0.48307	9.74546e-05	0.007546
AADACP1	1.39716	0.482493	0.00167539	0.0479426
PLK1	1.39663	0.481954	0.000342183	0.0169897
AL390115.1	1.39544	0.480718	0.00122233	0.0392527
LRRC3	1.39544	0.480715	0.0007682	0.0285876
UCK2	1.39517	0.480437	5.25362e-07	0.000196931
KLF2P1	1.39475	0.480006	0.00149127	0.0447078
RNU1.70P	1.39335	0.478562	5.97929e-06	0.00112439
PPFIA3	1.393	0.478197	0.000317655	0.016242
CDC45	1.39263	0.477814	5.91628e-05	0.00543366
NKX2.1	1.39232	0.477489	0.00240434	0.0600008
TNFSF9	1.39201	0.477171	0.00788412	0.120547
CEP55	1.39198	0.477143	0.000151932	0.0101054
C8orf88	1.39176	0.476915	0.0107604	0.145534
DEPDC1	1.39155	0.476692	0.000237755	0.013444
LPAR3	1.39154	0.476681	0.0345052	0.269487
AC104986.2	1.39152	0.476665	0.000121637	0.00869305
HMX2	1.39142	0.476561	4.31376e-07	0.000170729
TMPRSS11D	1.39138	0.476513	0.0117648	0.15347
AC016582.3	1.39096	0.47608	0.00054329	0.0230038
SH2D2A	1.39045	0.475549	0.000186296	0.0115496
DAB1	1.39026	0.475354	0.0211044	0.211757
FMNL2	1.39006	0.475152	0.00132078	0.0412348
RF00019.226	1.3894	0.474463	4.39581e-05	0.0044576
POLD2P1	1.38937	0.474431	7.88125e-09	8.57874e-06
TROAP	1.38878	0.473818	0.000131252	0.00907936
ASPRV1	1.38855	0.473579	0.00706482	0.113281
MYBPC1	1.38848	0.47351	0.0279568	0.244286
AC104695.3	1.3874	0.472382	0.00286263	0.0669824
SPRR2F	1.38606	0.470987	0.00867512	0.128019
OGDHL	1.38602	0.470944	0.00285634	0.0668905
CHAC2	1.38488	0.46976	1.66077e-05	0.00229119
DCAF13	1.38483	0.469708	5.85647e-08	4.09244e-05
AC010275.1	1.38445	0.469316	0.00367913	0.0778573
HIST1H2BPS2	1.38383	0.468664	3.12989e-05	0.00352904
HMMR	1.38252	0.467303	0.000467557	0.0209704
HIST1H3C	1.38197	0.466723	0.000470412	0.0209868
LINC01876	1.38186	0.466609	0.000176543	0.011103
PRSS41	1.38145	0.466187	0.000509608	0.0221543
SPATC1L	1.38059	0.465281	0.00569681	0.100924
NRN1	1.38055	0.465238	0.0142826	0.171157
LDLR	1.38053	0.465226	0.00901283	0.130819
THNSL1	1.38016	0.464833	3.27305e-05	0.00361133
ZNF354C	1.38014	0.464817	6.20372e-05	0.00562729
AC005746.3	1.38009	0.464765	0.0125471	0.159094
KCNMB4	1.37966	0.464314	0.00660927	0.110061
NECTIN1	1.37915	0.463777	0.00872194	0.128302
CCNA1	1.37895	0.463573	0.0132282	0.164054
CNFN	1.37889	0.463512	0.0419992	0.297635
AC010677.1	1.37881	0.463421	0.000536148	0.0228997
SLC16A9	1.37854	0.463143	0.0100508	0.139537
SELENOOLP	1.37775	0.462315	0.0163247	0.18353
CDX2	1.3773	0.461846	0.00838954	0.125493
MYBL2	1.37712	0.461656	0.0039941	0.0818515
SLC52A1	1.37656	0.46107	0.00448953	0.08796
HIST1H2BE	1.37624	0.460733	0.000424206	0.0196168
KIF2C	1.37614	0.460629	0.00011985	0.00862288
KLK14	1.37593	0.460405	0.0359974	0.2753
AC022031.2	1.37478	0.459201	0.000541662	0.0229829
DKKL1	1.3746	0.459016	9.99106e-06	0.00162038
AC105219.2	1.37446	0.458864	0.00593231	0.103349
TPPP3	1.3744	0.458803	0.00950677	0.135134
ZIK1	1.37349	0.45785	0.00482904	0.0916669
KIF11	1.37202	0.4563	7.14856e-05	0.00613065
MIR9.3HG	1.37199	0.456269	0.000934919	0.0327523
SLC25A24P1	1.3716	0.455863	3.04374e-06	0.000706073
FABP5P1	1.37137	0.455615	0.000812169	0.0297073
NELL2	1.37059	0.454802	0.0154428	0.178972
ABHD17AP4	1.37035	0.454549	2.11108e-08	1.82531e-05
HIST1H2APS3	1.36978	0.453949	0.00486286	0.0920253
AC092903.1	1.36954	0.453694	0.00010838	0.0081075
GPC2	1.36895	0.453073	0.0166652	0.185289
AC007128.1	1.36884	0.452949	0.000463492	0.0208708
SMC1B	1.36873	0.452833	0.0025936	0.0631145
PDSS1	1.36862	0.452721	5.60832e-08	3.96803e-05
SLC6A2	1.36862	0.452717	0.00135476	0.0419489
RNA5SP174	1.36854	0.452633	0.00401298	0.0819713
AC079466.1	1.36791	0.45197	0.0043715	0.0865765
PPP2R2C	1.36708	0.451093	0.0133392	0.164653
TMEM74B	1.367	0.451008	0.00812999	0.123161
TUBA3E	1.36698	0.450995	0.00599954	0.104008
CYP2T1P	1.36635	0.450325	0.00183155	0.0507188
AC018553.1	1.36583	0.449774	0.00426912	0.0851146
KIF12	1.36573	0.449669	0.0101027	0.140017
AC104088.1	1.36571	0.449656	7.51493e-05	0.00636767
AL139156.2	1.3656	0.449533	1.13029e-05	0.00177712
CSKMT	1.365	0.448904	7.79246e-09	8.57874e-06
HAP1	1.36447	0.448338	0.00203894	0.0541314
ARMCX1	1.36428	0.448136	0.0120226	0.154951
AC156455.1	1.36377	0.447598	0.000551439	0.0231375
ARC	1.36276	0.446529	6.38505e-05	0.00571157
POU6F2	1.36249	0.446242	0.000489197	0.0214873
TFAP4	1.36248	0.446234	8.53627e-09	9.10229e-06
WNT11	1.36224	0.44598	0.0295298	0.25011
HIST1H2AM	1.36223	0.445966	0.00130773	0.041027
BEX5	1.36171	0.445417	0.00931538	0.133653
ABCC5	1.36162	0.445328	0.00314991	0.0710323
LSAMP.AS1	1.36153	0.445234	0.000580806	0.0239089
ZNF75A	1.36079	0.444446	1.16758e-05	0.00180567
KIT	1.36059	0.444231	0.0360358	0.2753
LINC02154	1.36045	0.444088	0.0473215	0.31536
AC073365.1	1.36001	0.443615	0.0239037	0.22677
ZNF879	1.35989	0.443493	0.000188312	0.011611
AL031777.1	1.35958	0.443164	0.0240273	0.227234
HIST1H3F	1.35958	0.443164	0.000235803	0.0134005
FTCD	1.35942	0.442986	0.000157135	0.0103153
NPM3	1.35932	0.442886	1.27886e-05	0.00191488
ZNF280B	1.35923	0.442789	9.53826e-07	0.000295019
AC073343.1	1.3591	0.44265	0.000150284	0.0100193
RPL7P1	1.35877	0.442297	0.000109696	0.00813766
FGF12	1.3584	0.441914	0.00156681	0.0459622
AC073585.1	1.35825	0.441746	2.44501e-05	0.00296979
CRYZL2P	1.3582	0.441696	0.00208164	0.0547454
ALX1	1.35796	0.441438	0.00183141	0.0507188
LTB4R2	1.35749	0.44094	3.88076e-05	0.00409048
AC074135.1	1.35746	0.440907	0.00220347	0.0568405
SYT5	1.35718	0.440609	2.6056e-05	0.00313617
PPP4R1L	1.35695	0.440365	6.92617e-08	4.55855e-05
SLC29A4	1.35694	0.440355	0.00680592	0.111531
LTB4R	1.35591	0.439265	0.00289418	0.0673311
SNHG3	1.35399	0.437222	1.68392e-05	0.00229119
TWNK	1.35348	0.436675	2.0081e-08	1.80417e-05
PPIAP35	1.35347	0.436658	5.45738e-09	6.42857e-06
TPRXL	1.35267	0.435808	0.0476125	0.316199
PIR	1.3526	0.435738	0.0180667	0.193383
AL162411.1	1.35185	0.434936	0.00126169	0.0400589
CDCA7	1.35149	0.434547	0.00529863	0.0967773
HIST1H2BF	1.35148	0.434541	0.0146132	0.173404
NHP2P2	1.35147	0.434528	1.46684e-05	0.00210192
GJB7	1.35093	0.433956	0.00535289	0.0973118
WNT3A	1.3508	0.433811	7.79223e-05	0.00652449
C1GALT1C1L	1.35069	0.433697	0.00119408	0.0388144
TKTL1	1.35047	0.433458	0.000753206	0.0282524
CECR7	1.3504	0.433382	0.00301211	0.0691354
NIP7	1.35035	0.43333	3.93728e-08	3.09525e-05
PAGE2B	1.35006	0.433024	0.0247194	0.230467
HSPD1	1.34936	0.432274	5.43015e-07	0.000201271
NOB1	1.3488	0.431682	4.97096e-09	6.22971e-06
AL118516.1	1.34879	0.43167	5.76973e-05	0.00535375
AC090498.1	1.34879	0.431666	0.00179311	0.0499968
HDGFP1	1.34859	0.431455	0.0401772	0.291307
LTBP4	1.34775	0.430548	0.00288602	0.0672245
FOXC2	1.3477	0.4305	0.00149363	0.0447078
AC021504.1	1.34694	0.429686	0.00118931	0.038755
RPL30	1.3464	0.429104	2.34894e-07	0.000111139
DLK2	1.34638	0.429086	0.00732137	0.115072
TOP1MT	1.34629	0.428985	5.46318e-06	0.00106104
RIDA	1.34562	0.428266	1.19543e-05	0.00182875
NEK2	1.34551	0.428153	0.000655578	0.0258586
AC245100.7	1.34542	0.428061	0.00012439	0.00879373
CEBPA.DT	1.3454	0.428034	0.00895752	0.130505
NUDT8	1.34538	0.428014	0.00039086	0.0186937
SEMA3D	1.34528	0.427909	0.00612581	0.105166
AL390198.1	1.34507	0.427678	0.0257658	0.234755
TBX15	1.34496	0.427563	5.54286e-05	0.00520294
ANKRD46	1.34494	0.427546	0.000384558	0.0185091
AC004846.1	1.34493	0.427529	0.000259263	0.0142496
PFDN2	1.34466	0.427237	1.29074e-05	0.00192259
AP003390.1	1.34389	0.426411	0.000516403	0.0223953
HTR2C	1.34348	0.425976	0.000535612	0.0228997
LINC01816	1.34345	0.425941	0.000611788	0.0247182
TRIM59	1.34334	0.425826	3.49349e-07	0.000147566
CCDC86	1.34318	0.425651	4.62917e-06	0.000945802
TDRD9	1.3429	0.425347	0.00178333	0.0497732
PHETA2	1.34277	0.425208	0.00207971	0.0547454
BIRC5	1.34276	0.425202	0.000934174	0.0327523
SEPT3	1.34265	0.425083	0.0375059	0.281855
RBM38	1.34264	0.425068	0.000128956	0.00897807
NUS1P2	1.34261	0.425045	6.09773e-06	0.00113162
SYT14	1.34261	0.425038	1.72512e-06	0.000458428
AL023803.1	1.34222	0.424618	0.00091317	0.0322025
PAICS	1.34195	0.424329	6.23952e-06	0.00114294
DEPDC1B	1.34192	0.4243	0.000465293	0.0208854
AC106798.1	1.34092	0.423224	0.00011674	0.00848269
NOP16	1.34089	0.423194	9.52231e-09	9.79966e-06
AC019155.3	1.34084	0.423141	0.00705113	0.113281
NKX6.1	1.34082	0.423112	0.000429676	0.019805
KIF20A	1.33971	0.42192	0.00183657	0.0507833
HYAL1	1.33894	0.421087	0.0045228	0.0883291
RPS2P46	1.33867	0.420797	0.000394362	0.0187577
AC008556.1	1.3385	0.420615	0.0294802	0.249894
AC021028.1	1.33849	0.420612	0.000345097	0.0171044
MFAP2	1.33804	0.420125	0.0260343	0.235888
ASPM	1.33792	0.419995	0.00133895	0.0416871
ANKLE1	1.33735	0.419377	3.95077e-05	0.00413429
ZNF334	1.33723	0.419248	0.0088222	0.12908
PSAPL1	1.33707	0.419072	0.0250747	0.231908
AURKA	1.33673	0.418705	0.000278671	0.0148857
C2orf72	1.3365	0.418463	0.0216353	0.214317
FZD6	1.3365	0.418456	0.00116968	0.0383581
PRKAR1B	1.33647	0.418429	0.00033526	0.0167636
CES3	1.33646	0.418415	0.00332718	0.0731027
ERCC6L	1.33628	0.418217	0.000234295	0.0133955
PCOLCE2	1.33522	0.417079	0.00932974	0.133658
PDIA2	1.33475	0.416568	0.00214336	0.0557787
AC040169.1	1.33435	0.416137	0.00183607	0.0507833
ACVR1C	1.33425	0.416033	6.0254e-06	0.00112558
GNGT1	1.33412	0.415885	0.000121135	0.0086833
AL157931.1	1.334	0.415756	0.000102889	0.00787441
OR11H7	1.33397	0.415724	4.37365e-07	0.000170729
DGUOK.AS1	1.3337	0.415431	0.00321766	0.0718163
ITPRIPL1	1.33355	0.415269	0.000302244	0.0157858
KRT17P3	1.33348	0.415198	0.0133969	0.165169
SDHAF3	1.33322	0.414914	0.000160491	0.0104202
AC108047.1	1.33317	0.414863	1.66441e-05	0.00229119
AL355994.2	1.33275	0.414401	9.50264e-08	5.66177e-05
AC093249.2	1.33257	0.41421	1.78267e-06	0.000467143
GPR1.AS	1.33195	0.413544	0.000217577	0.0127752
LINC01139	1.33172	0.413287	0.00759459	0.117999
AL132655.2	1.33142	0.412965	8.5714e-05	0.00690618
CDCA8	1.33099	0.412502	0.000771326	0.0286474
LINC02432	1.3307	0.412189	0.00338481	0.0738462
SLC8A2	1.32983	0.411243	1.62983e-05	0.00226848
AL138789.1	1.32965	0.411051	0.00708278	0.113361
AC093801.1	1.32958	0.410976	4.08636e-05	0.00422845
RAB34	1.32943	0.410806	0.0206234	0.209278
AL354707.1	1.32932	0.410684	0.00290998	0.0675597
CCDC8	1.32921	0.410569	0.0354556	0.273116
PKMYT1	1.32902	0.410365	0.000474066	0.0210879
LINC01607	1.32851	0.409812	0.000990572	0.0340221
SLC25A5P5	1.32849	0.409791	0.00114178	0.0377055
GCLC	1.32843	0.409718	0.0159798	0.182356
TFCP2L1	1.32775	0.40898	0.0189919	0.199425
POP1	1.32743	0.408635	8.40811e-06	0.0014353
SHF	1.32737	0.408568	0.00156146	0.0458554
SLCO1A2	1.32733	0.408527	8.58667e-06	0.00145516
RF02247	1.3271	0.408279	0.0275462	0.242653
AC008083.1	1.32707	0.408241	0.00301449	0.0691354
AC008649.1	1.32697	0.408136	7.95051e-06	0.00138602
AL163952.1	1.32697	0.408133	7.02898e-05	0.00610206
LIN28B	1.32691	0.408075	0.000255469	0.0141488
AL645608.1	1.32683	0.407985	0.000706653	0.0271756
PCDHB5	1.32681	0.407966	0.0316932	0.258673
EVC	1.32633	0.407438	0.00628015	0.106492
PPIF	1.32592	0.406989	0.000284425	0.0151165
SLC45A4	1.32571	0.406761	0.00122216	0.0392527
ORC1	1.3256	0.406646	0.000614383	0.0247688
JPH1	1.32558	0.406622	0.00871758	0.128302
NUP107	1.32553	0.406568	0.000126369	0.00887438
CRMP1	1.32543	0.406456	0.00212067	0.0554002
MCRIP2P1	1.32481	0.405787	0.00426169	0.0850391
SHMT2	1.32477	0.405742	2.02597e-07	0.000100591
COL27A1	1.32402	0.404925	0.0112302	0.149378
SLC5A12	1.32335	0.404196	0.000122288	0.00871757
RNLS	1.32322	0.404051	0.000520112	0.02249
TBC1D30	1.32306	0.403878	0.00418041	0.0841165
HOXD9	1.32275	0.40354	0.00307331	0.0698055
MFSD6L	1.3227	0.403485	0.0277832	0.243403
MIF	1.3217	0.402397	0.000120299	0.0086411
AC008109.1	1.32155	0.402235	0.0480521	0.317496
TMEM63C	1.3211	0.401738	0.000297104	0.0155999
FAM83D	1.32056	0.401147	0.00564114	0.100495
METRN	1.32039	0.400966	0.0101947	0.140878
ECEL1	1.32001	0.400547	0.0156548	0.180467
CENPW	1.32001	0.400546	0.00172033	0.0486628
LINC01589	1.31989	0.400421	0.00102346	0.0348556
ZNF492	1.31983	0.400352	0.000191502	0.0117425
SOSTDC1	1.3198	0.400316	0.0277272	0.24317
AC079062.1	1.31973	0.400243	0.00946337	0.134782
EN2	1.3191	0.399554	0.00153563	0.0454181
AP001205.1	1.31906	0.399515	0.000864551	0.0310363
AC131009.3	1.31869	0.39911	0.000148973	0.00995869
TOP2A	1.31814	0.398504	0.00728028	0.114689
IGFBPL1	1.31805	0.398404	0.00791138	0.120864
RF00019.491	1.31783	0.398169	0.000455208	0.0206787
HIST1H2AL	1.31772	0.398046	0.000154864	0.0102522
SLC9A3P2	1.3176	0.397907	0.000219078	0.0128137
AL645608.2	1.31746	0.397764	0.000385083	0.0185187
ITM2C	1.31713	0.397394	0.0366404	0.277262
AP003068.4	1.31711	0.397372	0.00479856	0.0913582
LINC01703	1.31656	0.396778	0.000399554	0.0188935
LRP3	1.31656	0.396773	0.00334431	0.07337
RPP40	1.31633	0.39652	1.72748e-07	9.13818e-05
AL450998.1	1.31579	0.395929	0.0259695	0.23566
MRPS25	1.31564	0.395765	1.22899e-05	0.00185998
UBE2S	1.31519	0.395271	0.000433852	0.0199649
NEB	1.31499	0.395047	8.58407e-06	0.00145516
PRAC1	1.31436	0.394365	0.0337445	0.26709
KCNC3	1.31422	0.394206	0.0102278	0.14113
FAM216A	1.31421	0.3942	0.000144801	0.00973399
SMPD4P1	1.31419	0.394171	3.10282e-05	0.00352662
OBSCN	1.31398	0.393947	0.00061845	0.0248308
RIPPLY2	1.31396	0.393917	0.035326	0.272609
MRPS12	1.31382	0.393765	2.18334e-05	0.0027341
CENPF	1.31368	0.393615	0.00357787	0.076594
AC005682.1	1.31354	0.393462	0.00108853	0.0364485
RACGAP1	1.31347	0.39338	0.000502863	0.0219284
PRR5	1.31343	0.39334	2.85722e-06	0.000666433
AP001992.1	1.31322	0.393113	0.00377642	0.0789851
PRR11	1.3131	0.39298	0.00317696	0.071358
HIST1H1PS1	1.31276	0.392599	0.0450086	0.307159
CDCA3	1.31245	0.392259	0.000305068	0.0158854
YBX1	1.31224	0.392029	5.02817e-07	0.000189736
CACNA1B	1.31223	0.392017	5.80215e-06	0.00109837
YTHDF3.AS1	1.31221	0.392003	0.000410645	0.0192731
TM4SF19	1.31136	0.391065	0.0234324	0.224562
DOC2A	1.31127	0.390964	0.000722326	0.0275692
MCM10	1.31115	0.39083	0.0016157	0.0467784
GSTP1	1.31108	0.390758	0.00108466	0.0364276
FCHO1	1.31075	0.390394	0.0150323	0.176097
RPS16P9	1.31071	0.390351	0.00112314	0.0372639
AC126768.2	1.31061	0.390236	7.70772e-05	0.0064825
EBPL	1.31049	0.39011	0.00201542	0.0536579
GAP43	1.31037	0.389973	0.00602711	0.104294
LYAR	1.31017	0.389757	1.09242e-05	0.00172237
HHEX	1.30985	0.389399	0.00247795	0.0612693
AC011450.1	1.30947	0.388978	0.00282384	0.0665149
ECE2	1.30943	0.388939	4.19685e-06	0.000876568
ASIC1	1.30943	0.388938	0.00204991	0.0543461
SLC25A32	1.30933	0.388834	3.13122e-06	0.000720461
HIST1H2BI	1.30932	0.388816	0.000229208	0.0132519
TONSL	1.30901	0.388481	0.000107958	0.00809427
LINC01436	1.309	0.388466	0.0492043	0.3208
MLXIPL	1.309	0.388464	0.00483501	0.0917437
MTFR2	1.30876	0.388204	0.000104833	0.0079648
VRK1	1.30868	0.388111	2.80852e-06	0.000662366
AL589182.1	1.30848	0.387894	0.0285745	0.246251
CHST2	1.30818	0.387563	0.0415609	0.296074
C2orf74	1.30794	0.387292	0.00386729	0.0800697
AC090589.1	1.30792	0.387274	0.00378931	0.0790866
FAM155B	1.30774	0.387071	0.0195433	0.202896
CASC8	1.30746	0.386764	0.00786106	0.120453
HJURP	1.30741	0.386715	0.00106248	0.0358606
CCNB2	1.30713	0.386405	0.00115763	0.0381175
ME1	1.30702	0.386283	0.0199839	0.205436
CBS	1.30684	0.386081	1.82737e-05	0.00244522
AC005082.1	1.30678	0.386016	0.00877833	0.128723
TBX18	1.30651	0.38572	0.0075921	0.117992
EXOSC4	1.30643	0.385625	1.18478e-05	0.00182231
GPT2	1.30634	0.385525	0.00357201	0.0765427
LINC02377	1.30631	0.385496	0.00794771	0.121231
PALM	1.30615	0.385325	0.0458007	0.309986
CHST8	1.30608	0.385238	0.0289095	0.247363
PRMT1	1.30588	0.385026	6.65462e-08	4.4735e-05
SAPCD2	1.30566	0.384779	0.00984186	0.138093
UQCRH	1.30558	0.384692	7.94257e-07	0.000262904
AL163636.1	1.30531	0.384396	0.000685475	0.0266292
MYO1B	1.30519	0.384265	0.0141267	0.169983
EFS	1.30478	0.383801	0.0332221	0.265224
LDLRAD3	1.30429	0.383265	0.00534952	0.0972987
SNRPF	1.30377	0.382689	1.35615e-06	0.000374442
VCX	1.30369	0.382606	0.0212484	0.212514
SYT13	1.30306	0.381905	0.00259362	0.0631145
FAM83G	1.30301	0.381845	0.00383732	0.0796771
WDR3	1.30288	0.381704	7.29294e-06	0.00130219
LINGO1	1.30268	0.381487	0.00444781	0.0874542
AL023803.2	1.30259	0.381388	0.00105341	0.0356398
ATF7IP2	1.30237	0.381135	0.0195893	0.20315
AGMAT	1.30195	0.380678	0.00269259	0.064596
FIRRE	1.30171	0.380408	0.00789666	0.120671
AL162231.2	1.30164	0.380329	0.00296939	0.0685174
DMC1	1.30161	0.3803	1.65482e-05	0.00229013
EPHA4	1.30151	0.38019	0.0197573	0.204093
RPL9P9	1.30148	0.38015	0.0455868	0.309352
NOP2	1.30144	0.38011	9.01908e-07	0.000282467
AP003352.1	1.30123	0.379876	0.000286311	0.0151882
AL049870.2	1.30053	0.379101	0.000102736	0.00787441
AC104794.3	1.30043	0.378991	0.00067567	0.0264118
AL512363.1	1.30033	0.378873	0.0243207	0.228633
SNHG4	1.29993	0.378434	0.00355136	0.0761994
CHST10	1.29971	0.378185	0.0120621	0.155239
LMNB2	1.29968	0.378154	4.60292e-05	0.00460308
CNNM1	1.29952	0.377979	4.96132e-05	0.00486691
KIF22	1.29932	0.377753	1.46274e-05	0.00210137
FBL	1.29928	0.377718	5.68755e-06	0.00108393
SNORD83A	1.29913	0.377549	0.0104889	0.143578
LINC02527	1.29904	0.377445	2.15373e-05	0.002703
AL391095.1	1.29899	0.37739	3.64161e-05	0.00394115
LINC00605	1.29878	0.377161	0.000274323	0.0147597
DANCR	1.29856	0.376908	0.00819767	0.123636
CTXND1	1.29851	0.376856	0.0299633	0.25148
RF02272	1.29844	0.376779	1.57504e-05	0.00221767
SEPHS2	1.29808	0.376379	3.47331e-06	0.000777061
TBL1X	1.29793	0.376215	0.00262625	0.0635467
AL355987.5	1.29757	0.375818	1.05359e-05	0.00167986
AURKB	1.29757	0.375815	0.00360361	0.0769703
ABCB6	1.29739	0.375608	0.000233638	0.0133715
CDT1	1.29736	0.375578	0.0012392	0.0396053
ESPL1	1.29701	0.37519	0.00261757	0.063479
AC012073.1	1.29685	0.375014	0.000157767	0.0103236
FKBP4	1.29683	0.374985	7.62814e-06	0.00134927
LRP8	1.29679	0.374943	0.00252977	0.0621485
CABYR	1.29678	0.374933	0.0132259	0.164054
H2AFY2	1.29663	0.374769	0.0157329	0.180786
TNFRSF10D	1.29663	0.374761	0.00415509	0.0837856
AL117329.1	1.29614	0.374226	5.91476e-05	0.00543366
LDHC	1.29606	0.374127	0.000633422	0.025213
ZNF280A	1.29583	0.373878	7.18571e-07	0.000251065
LINC01169	1.29554	0.373556	0.00250601	0.0617793
MAP6D1	1.2953	0.373289	0.000589582	0.0241124
KHDC1L	1.29518	0.373148	0.00206264	0.0546068
CACNA1I	1.29492	0.372859	0.00448133	0.0878297
LIPC	1.29483	0.372761	0.0418884	0.297179
AC034198.2	1.29482	0.372752	2.55746e-05	0.00308651
ADGRL3	1.29467	0.37258	0.000391419	0.0186937
LINC02610	1.29456	0.372466	2.46943e-05	0.00298664
RPS15P9	1.29403	0.371874	7.80097e-06	0.0013739
TLX1	1.29403	0.371871	0.00683365	0.111824
BUB1	1.29324	0.370984	0.00149297	0.0447078
KIF5A	1.29314	0.370881	0.00158593	0.0463192
MIS18A	1.29292	0.370629	4.94205e-05	0.00485996
PYCR3	1.29282	0.370518	3.12772e-05	0.00352904
RB1	1.29272	0.370406	0.00494664	0.0929581
YBX1P1	1.29229	0.369929	0.000214506	0.0126971
SPAG5	1.29208	0.369698	0.00101076	0.0345268
HIST1H3D	1.29193	0.369529	0.0234427	0.224594
ZNF501	1.29192	0.369522	5.74845e-05	0.00534276
SPAG6	1.29189	0.369483	6.98829e-05	0.00609478
MRPL40P1	1.29159	0.369146	0.00159236	0.0464114
QRFPR	1.2915	0.369047	8.00029e-05	0.00662035
BOLA3.AS1	1.29133	0.368863	0.00795044	0.121231
PARPBP	1.29129	0.368811	8.30846e-05	0.00677056
CAND2	1.29104	0.368529	0.0160345	0.182453
PRAC2	1.29081	0.368281	0.0457794	0.309953
RNU6.438P	1.29077	0.368235	0.00772165	0.119035
HIST1H2BL	1.29062	0.368067	0.000602092	0.0244649
STRA8	1.29041	0.367829	0.00335526	0.0734964
AC091133.4	1.29039	0.36781	0.00174133	0.0490322
EXOSC5	1.28995	0.367311	3.24961e-05	0.0035995
AC010595.1	1.28974	0.367079	2.20331e-05	0.00275301
IRS1	1.28972	0.367054	0.0137826	0.167242
SQLE	1.28961	0.366938	0.00568739	0.100846
TRIM7	1.28932	0.366614	0.0298952	0.251169
CIDEA	1.28927	0.366551	0.00973786	0.137247
FAM83F	1.2892	0.366472	0.00917625	0.132229
LINC00668	1.28914	0.366404	0.0241421	0.227748
PUS7	1.28888	0.366114	9.44336e-05	0.00737259
RRP12	1.28871	0.365933	4.13511e-07	0.000168018
LINC02001	1.28854	0.365736	0.000374179	0.0182266
SLC16A8	1.28827	0.365435	0.00387305	0.0800959
AP001065.1	1.28807	0.365211	0.0262796	0.23701
PPAT	1.28806	0.365202	7.5564e-05	0.00638369
RPL41P5	1.2879	0.365017	0.000153141	0.0101738
ZNF560	1.2877	0.364791	0.0020664	0.0546298
FJX1	1.28767	0.364758	0.0161354	0.183062
AC011481.1	1.28752	0.364595	9.52508e-07	0.000295019
CDCA5	1.28729	0.364335	0.00328249	0.0726616
DDX39A	1.28726	0.364304	2.18375e-07	0.000105645
FKBP11	1.28713	0.364152	5.98178e-05	0.00547865
SDR42E1	1.28702	0.364034	0.0120528	0.155189
AC091982.3	1.28694	0.363946	0.000109195	0.00813101
NOLC1	1.28682	0.363814	4.7516e-06	0.000963979
PUS1	1.28671	0.363685	4.35985e-07	0.000170729
CASC20	1.28665	0.363617	7.12509e-05	0.0061198
UBE2SP1	1.28662	0.363581	0.00816917	0.123394
ALX3	1.28656	0.363519	2.39369e-06	0.000583999
DDT	1.28653	0.363485	1.73008e-05	0.00234272
DLX6	1.28609	0.36299	0.0236679	0.225682
TMEM121	1.28599	0.362882	0.00180797	0.050312
ANKRD13B	1.28575	0.362615	0.00920703	0.132504
ZNF74	1.28566	0.362513	0.000250372	0.013921
SPAG17	1.28536	0.362169	0.01504	0.176097
HIST3H2BB	1.28532	0.362127	0.00766882	0.118631
AC110285.7	1.28494	0.361697	0.00962148	0.136353
SNORA71C	1.28408	0.360739	0.0174742	0.189841
AC010608.2	1.28395	0.360591	5.25417e-05	0.00505774
KIF14	1.28389	0.360516	0.00327883	0.0726616
RND2	1.28384	0.360468	0.00688559	0.112198
AC011005.4	1.2837	0.360311	7.89164e-05	0.00656887
NME1.NME2	1.28354	0.360124	0.000477891	0.0211987
MARC1	1.28336	0.359923	0.00301433	0.0691354
PRKRA.AS1	1.28314	0.359679	0.00121747	0.0392413
DLGAP5	1.28293	0.35944	0.00637157	0.107623
AADACL2.AS1	1.28272	0.359211	3.11205e-05	0.00352904
CMTM4	1.28266	0.35914	0.00476566	0.0909768
B4GALNT1	1.28265	0.359128	0.00862018	0.127557
DDX21	1.28232	0.358753	0.00151707	0.0451467
C16orf87	1.28227	0.3587	5.91211e-05	0.00543366
KCNS1	1.28215	0.358568	0.0194966	0.202671
AC078883.3	1.282	0.358395	0.00058139	0.0239156
FAR2P4	1.28194	0.358334	0.00419731	0.0843665
RPL8	1.2819	0.358287	1.03484e-05	0.00165463
PRSS50	1.28172	0.358078	0.00468861	0.0900831
TSPEAR	1.28154	0.35788	0.000713588	0.0273649
SLC2A9	1.28151	0.357848	0.0225566	0.219864
CELSR1	1.28136	0.357679	0.0406393	0.292952
GLIS2.AS1	1.28136	0.357676	0.000666159	0.0261665
SV2A	1.28087	0.357122	0.0432238	0.301931
PRSS45	1.28071	0.356946	0.000690613	0.0267374
AL590326.1	1.28056	0.356778	0.00623753	0.106055
AC008011.2	1.28047	0.356673	0.00207805	0.0547454
MPP6	1.28039	0.356585	0.0051391	0.0950308
NDRG4	1.28025	0.356424	0.0284758	0.245999
IPO4	1.28021	0.35638	8.66414e-07	0.000273971
SOX12	1.28021	0.356377	0.0020808	0.0547454
ZDBF2	1.2802	0.356373	0.00451079	0.0882238
PCDHB6	1.27998	0.356122	0.0312172	0.25651
KREMEN2	1.2798	0.355913	0.0365766	0.277105
SLC6A16	1.27964	0.355737	0.00086756	0.0310795
SRM	1.2796	0.355695	9.80299e-06	0.00160832
AC239868.1	1.27899	0.355008	0.00906038	0.131227
ZC3HAV1L	1.27899	0.355001	0.00179004	0.049936
AL354877.1	1.27891	0.354911	0.00353503	0.0759925
AC012498.2	1.27883	0.354822	0.00783257	0.120179
KLHL8	1.27867	0.354643	6.27976e-05	0.00566901
FAM71E1	1.27816	0.354067	0.00513924	0.0950308
IBA57	1.27802	0.353916	1.03612e-06	0.000313616
B3GNT4	1.278	0.353888	0.000456036	0.0206831
SLC39A4	1.27794	0.353823	0.00621395	0.105987
AC026403.1	1.27767	0.353516	0.0179315	0.192648
MAD2L1	1.27764	0.353477	0.00230176	0.058476
BOLA1	1.27755	0.353378	0.000748495	0.028147
RPL6	1.27751	0.353337	2.85723e-06	0.000666433
PNPLA3	1.2775	0.353323	0.000158816	0.0103729
TAF4B	1.27733	0.353126	0.0029252	0.067846
C17orf107	1.27723	0.353023	8.22975e-05	0.00674125
MSL3P1	1.27722	0.353006	1.06773e-07	6.29536e-05
PRKCQ	1.27707	0.352843	0.0294812	0.249894
TTK	1.27687	0.352611	0.00348075	0.0752549
MKI67	1.27659	0.352301	0.0063902	0.107828
PELI2	1.27658	0.352287	0.00887045	0.12957
TGIF2	1.27655	0.35225	0.00210957	0.0552604
CYP4F26P	1.27639	0.352075	0.00942738	0.134478
AC025183.1	1.27625	0.351911	0.0165997	0.185136
XPOT	1.27603	0.351657	0.000174843	0.0110328
RSL1D1	1.276	0.351631	1.25656e-06	0.00035562
CSE1L	1.27591	0.351529	1.31674e-06	0.000367725
CYCS	1.27583	0.35144	1.10188e-06	0.000321707
HMX1	1.2758	0.351397	0.0032503	0.0721748
RPS2P7	1.27578	0.351379	7.32549e-05	0.00623515
AP002360.1	1.27576	0.351353	0.00530646	0.0968579
CHEK2	1.27566	0.351248	1.08597e-05	0.00171699
NAT8L	1.2756	0.351178	0.0125553	0.159119
SLC35G1	1.27557	0.351137	0.000155525	0.0102778
AC025159.1	1.27544	0.350997	0.00273333	0.0651545
PPAN	1.27518	0.350701	0.000102923	0.00787441
PTDSS1	1.27518	0.350698	1.97011e-05	0.0025557
TRO	1.27487	0.35035	0.0104824	0.143557
PRDM13	1.27445	0.349872	1.55443e-07	8.54213e-05
EXO1	1.27443	0.349849	0.00220882	0.0568594
TNFAIP8L1	1.27431	0.349712	1.54238e-05	0.0021771
COA7	1.27414	0.349524	2.68796e-06	0.000641957
PITX2	1.27382	0.34916	0.0254402	0.233344
RUVBL1	1.27379	0.349128	5.40695e-06	0.00105598
CYC1	1.27377	0.349104	1.14214e-05	0.00178583
TPTEP1	1.27375	0.34908	0.00487133	0.0921239
NR0B1	1.27369	0.349009	0.0107423	0.145433
UBR5.AS1	1.27356	0.348865	0.000200948	0.0121001
HIST1H4J	1.27319	0.348443	0.00081246	0.0297073
NKAIN1	1.27312	0.348367	0.0156296	0.18025
AC099518.1	1.273	0.348233	0.0168984	0.186886
COBL	1.27295	0.348177	0.0101605	0.140666
AL032819.1	1.27282	0.34803	0.000208948	0.0124698
C1orf115	1.27265	0.347832	0.0453292	0.308523
MLF1	1.2724	0.347553	0.0073229	0.115072
CKS1B	1.27224	0.347366	0.000407207	0.0191594
SPRR4	1.27219	0.347311	0.0306364	0.254222
OR7E38P	1.27202	0.347122	0.000500744	0.0218528
AC092969.1	1.2718	0.346869	0.00603624	0.104408
AL772337.1	1.27178	0.34685	0.0394199	0.288744
ZNF732	1.27171	0.346764	0.00236226	0.0594525
DNAH2	1.27159	0.346629	0.000155828	0.0102799
SNORA14B	1.27157	0.346606	0.00480161	0.0913713
NGB	1.2715	0.346537	0.0118648	0.153924
EIF4EBP1	1.2715	0.34653	0.00574695	0.101532
TPX2	1.27149	0.34652	0.0135916	0.166337
SNCAIP	1.27136	0.346368	0.00613644	0.105285
RPL13AP5	1.2711	0.346076	0.00120285	0.0389272
DDN.AS1	1.27107	0.346049	1.49255e-05	0.00212799
SNORA73B	1.27093	0.34588	0.0358402	0.274539
GBX1	1.27081	0.345743	0.00176122	0.049353
PTGER1	1.27079	0.345728	0.00158358	0.0462745
GCK	1.27062	0.345535	3.70318e-07	0.000155265
UQCRHL	1.27057	0.345475	5.55169e-06	0.00107248
PRDX1P1	1.27051	0.345409	0.000116745	0.00848269
VAX1	1.27039	0.345267	7.72385e-07	0.000259291
PIWIL2	1.27023	0.345093	0.00536962	0.0974262
JPH3	1.26958	0.344357	0.00254552	0.0623482
LIN9	1.26945	0.344207	1.91039e-05	0.00250632
MAP7D2	1.26916	0.343874	0.0218576	0.215556
BEND3	1.269	0.343693	0.000196289	0.0119082
AC099850.3	1.26882	0.343485	0.0362707	0.275971
FANCD2	1.26823	0.34282	0.000786975	0.029095
ZFP69B	1.26812	0.342691	0.000244405	0.0136833
SMAGP	1.26808	0.342648	0.00744399	0.116361
ADAMTS20	1.26772	0.342242	1.86122e-05	0.0024788
PAX7	1.26752	0.342005	0.0011178	0.0371955
KCTD1	1.26724	0.341693	0.0171188	0.18767
BANF1P2	1.267	0.341414	0.0364946	0.276866
RPL35P5	1.26699	0.341405	0.00716496	0.113951
PTTG1	1.26697	0.341382	0.00454049	0.0883713
LPCAT2	1.26686	0.341256	0.020495	0.208344
FAM89A	1.26677	0.34116	0.00688628	0.112198
LINC02449	1.26668	0.341055	0.000623554	0.0249431
TESMIN	1.26655	0.340904	0.00794947	0.121231
CHTF18	1.2663	0.340621	0.000737667	0.0279849
OTOP3	1.26625	0.340562	0.000340559	0.0169537
EIF3E	1.26617	0.340466	9.65101e-06	0.00158798
CCN3	1.2661	0.340391	0.0402743	0.291624
NCAPH	1.2658	0.340045	0.00692507	0.112571
AL133215.2	1.26578	0.340031	0.000160601	0.0104202
AC012625.1	1.26544	0.33964	0.000321661	0.0163876
AC018641.1	1.26534	0.339523	0.00526692	0.0964332
KBTBD8	1.26529	0.339467	0.00056166	0.0234275
EEF1A1P5	1.26508	0.339224	0.0339659	0.267644
NLE1	1.26462	0.3387	2.35382e-06	0.00057773
RPS2	1.26458	0.338659	3.73651e-05	0.00399046
KIFC1	1.26414	0.338152	0.00694564	0.112744
CDK1	1.26407	0.338079	0.00240289	0.0599948
RPL17P43	1.26407	0.338079	0.000225632	0.0131256
DDX54	1.26383	0.337805	1.24576e-09	2.01464e-06
CCT3	1.26381	0.337777	1.27414e-07	7.28474e-05
TUBA1C	1.26358	0.337514	0.000291005	0.0153652
AC002470.1	1.26348	0.337397	0.00699428	0.113047
AC024581.1	1.26332	0.337215	4.6453e-06	0.000945802
AL031736.2	1.26328	0.33718	6.22267e-05	0.00563545
PTPRG	1.26326	0.337153	0.00394098	0.0810859
AC087612.1	1.26282	0.336652	0.00140665	0.0430608
LINC00707	1.26277	0.336593	0.0282821	0.245401
DKC1	1.26269	0.3365	2.00296e-05	0.00256654
YBX1P10	1.2624	0.336167	0.00107427	0.0361939
AC010894.3	1.26238	0.336149	0.0339896	0.267651
C10orf95	1.26217	0.33591	0.00029849	0.0156581
AC112178.1	1.26177	0.335452	0.000278885	0.0148857
AC073046.1	1.26165	0.335307	0.0353741	0.272785
FNDC10	1.26153	0.335176	0.0384157	0.285355
ALPL	1.26147	0.335111	0.0418766	0.297179
YEATS4	1.26137	0.334997	0.0071915	0.114148
ZNF695	1.26133	0.334947	0.000172247	0.0109177
RF02250	1.26123	0.334826	0.0214654	0.213567
CLPB	1.26108	0.334656	0.00053437	0.0228966
SLC7A5P1	1.26093	0.334493	2.28412e-05	0.002829
RF00019.621	1.2609	0.334459	0.0118126	0.153705
GAS5	1.26077	0.334303	0.00213782	0.05566
LINC01023	1.2607	0.334226	0.00230877	0.0586014
ZNF542P	1.26069	0.33421	0.0207943	0.210228
LINC01541	1.26068	0.334198	0.0296671	0.250587
BX842568.2	1.26059	0.334095	0.00269709	0.0646046
SNHG26	1.26053	0.334035	0.00611111	0.105009
TAF1A	1.26034	0.333808	0.000103178	0.00788135
AJUBA	1.26017	0.333616	0.0263752	0.237348
FAM222A	1.26015	0.333598	0.0077046	0.11892
AC009271.1	1.25993	0.333347	0.00465857	0.0898115
NAE1	1.25989	0.333302	2.47234e-06	0.000600599
UCHL5	1.25987	0.333273	6.53167e-05	0.00581298
RPL18P13	1.2598	0.333191	0.000513999	0.0223109
SLC22A31	1.25978	0.333166	0.000616185	0.0247831
RPL10P8	1.25971	0.333093	0.00103149	0.0350237
AL121761.1	1.25969	0.333072	0.0374567	0.281594
AL603825.1	1.2596	0.332963	0.0213951	0.213283
NRG1	1.25947	0.332818	0.0242768	0.228576
CDCA2	1.25943	0.332769	0.0048712	0.0921239
HDHD5	1.2594	0.332736	5.32154e-05	0.00507942
AC010343.1	1.25929	0.332608	0.00110618	0.0368957
AC091153.3	1.25921	0.332521	0.000820344	0.0299183
BRDT	1.2591	0.332395	0.00510731	0.0947108
RPL13	1.25907	0.332363	0.000400257	0.018911
SAMM50	1.259	0.332277	2.14456e-06	0.000537108
LLPH	1.259	0.332273	4.19798e-05	0.00432026
LINC01608	1.25895	0.332221	0.0298209	0.25092
ZNF706	1.25884	0.332099	0.00202451	0.0538494
TTF2	1.25883	0.332078	0.000270682	0.0146334
AC008982.2	1.25872	0.331959	0.00625556	0.106202
CENPA	1.25868	0.331908	0.0120698	0.155267
KRT42P	1.25866	0.331891	0.00136981	0.0422298
PGAM5	1.25857	0.331785	5.62406e-06	0.00108119
GGH	1.25808	0.331225	0.0394477	0.288814
COX6A1P2	1.25803	0.331168	0.000540019	0.0229476
AC068831.6	1.25798	0.331105	0.0285407	0.246157
MIR2052HG	1.25784	0.330953	2.35621e-07	0.000111139
LINC00470	1.25782	0.330926	0.0197987	0.204348
BAHCC1	1.25782	0.330924	0.00644035	0.1083
AC009902.2	1.25776	0.330855	0.00184529	0.0508794
RAB3IP	1.25763	0.330702	0.00782976	0.120168
GTSE1	1.25739	0.330429	0.00624938	0.10618
WDR43	1.25729	0.330316	6.21883e-06	0.00114294
DSCC1	1.25715	0.330162	0.00414398	0.0836682
CCDC113	1.25707	0.33006	0.00161366	0.0467434
ZDHHC19	1.25698	0.329959	2.4304e-05	0.0029584
AL050341.2	1.25681	0.329765	0.000700019	0.0270123
B4GALT3	1.25673	0.329677	0.000917706	0.0323035
RPL18	1.25669	0.329633	2.3258e-05	0.00286185
MORC2	1.25667	0.3296	1.63117e-05	0.00226848
C5orf66.AS1	1.25661	0.329533	0.0162991	0.183461
AC119403.1	1.25657	0.329493	0.00248014	0.0612749
TSEN2	1.25611	0.328962	0.00209404	0.0550009
AL355877.1	1.25597	0.328799	5.08783e-05	0.00494813
TRIT1	1.25595	0.328775	0.00146217	0.0441397
OXCT2	1.25592	0.328749	1.63074e-05	0.00226848
APRT	1.25578	0.328588	5.31471e-05	0.00507942
FAM24B	1.25559	0.328366	0.00693543	0.112707
ACTR3B	1.25557	0.328345	0.000156416	0.010299
PVT1	1.25557	0.328337	0.00869102	0.128073
WDR12	1.25541	0.328154	6.56741e-06	0.00119527
KLHL13	1.25536	0.328099	0.0087445	0.128427
ARHGDIG	1.25535	0.328095	0.000706573	0.0271756
DDIAS	1.25524	0.327959	0.00132493	0.0413417
NPIPP1	1.25438	0.326971	0.00498352	0.0932796
MYCNUT	1.2543	0.326882	0.0266773	0.238695
LINC00520	1.25428	0.32686	0.00865004	0.127802
LINC02571	1.25403	0.326572	0.000340978	0.0169596
AL355802.1	1.25396	0.326497	5.13992e-05	0.00498168
AL049838.1	1.25368	0.326172	0.00639704	0.107828
MTFR1	1.25365	0.32613	0.000111622	0.00820521
DUS3L	1.25349	0.325947	4.08214e-06	0.000862155
AL031123.1	1.2532	0.325615	0.0102148	0.141088
RPL22L1	1.25314	0.325545	0.00115176	0.0379687
H2AFJ	1.25305	0.325444	0.0122686	0.156968
TMEM108	1.25301	0.325403	0.00764053	0.118323
BCL2L12	1.253	0.325386	4.94565e-05	0.00485996
MIR3176	1.25299	0.32538	0.0406857	0.293079
MAPKAPK5.AS1	1.25294	0.325318	3.66496e-05	0.0039438
RPS16	1.25265	0.324983	2.80805e-05	0.00327714
FABP5P2	1.25243	0.32473	0.000549231	0.0231306
AC005696.4	1.25217	0.324431	0.00170165	0.0484004
LINC01992	1.252	0.324234	0.00144408	0.0438297
MIR1291	1.25191	0.324129	0.0011936	0.0388144
TP53AIP1	1.25182	0.324025	0.0261059	0.236071
TMEM69	1.25171	0.323896	1.7738e-06	0.00046698
PABPC4	1.25161	0.323781	0.000539309	0.0229346
MTHFD2	1.2515	0.32366	0.00659726	0.109958
KRT9	1.25146	0.323616	0.0188813	0.198757
AC008443.3	1.25137	0.323508	0.00654826	0.109464
MCRIP2	1.25125	0.323365	0.00363989	0.0774529
RNU1.103P	1.25115	0.32325	0.00481609	0.0915688
SLC22A20P	1.25104	0.323128	0.0117601	0.153445
KIF20B	1.25091	0.322978	0.00241051	0.0600791
AC246787.1	1.25084	0.3229	0.00254663	0.0623482
RPL32	1.25083	0.322887	0.000794241	0.0292871
TMEM179	1.25073	0.322771	0.000538925	0.0229346
RN7SL8P	1.25063	0.322652	0.0130181	0.162445
LDHB	1.25055	0.322563	0.0174532	0.189687
PRDX1	1.25038	0.322369	3.10108e-05	0.00352662
AL031985.3	1.25022	0.322183	0.00237288	0.0595874
TUBA3C	1.25007	0.322004	0.0368174	0.278044
AC092809.3	1.24984	0.321743	0.00101846	0.0347066
AC064807.1	1.24983	0.321732	3.16307e-05	0.00353827
CIT	1.24977	0.321662	0.00264157	0.0636789
AC006460.1	1.24976	0.321652	2.66186e-06	0.000638419
DANT1	1.24964	0.321508	0.0025485	0.062365
SNORD60	1.24962	0.321491	0.0403545	0.291849
BMP8B	1.24959	0.321453	0.0302253	0.252523
AP005482.1	1.24956	0.321422	0.00782068	0.120094
CCDC181	1.24955	0.321403	0.0044001	0.0869907
C1GALT1P1	1.24945	0.321294	0.00451931	0.0882988
ZNF541	1.24941	0.321246	0.00708187	0.113361
PES1	1.24933	0.32116	1.35709e-05	0.00200558
HIST1H3A	1.24928	0.321101	0.00725561	0.114576
LINC01694	1.24907	0.320851	0.00157851	0.0461808
AC105118.1	1.24895	0.320719	0.00414703	0.0836682
BEST4	1.24889	0.320649	0.00201251	0.0536579
LINC01639	1.24885	0.320595	5.67886e-05	0.00529547
AC115223.1	1.24879	0.320529	5.29106e-05	0.00507601
AL136162.1	1.24873	0.32046	0.000471063	0.0209946
MT3	1.24844	0.320126	0.00982319	0.137934
LRP12	1.24837	0.320043	0.012052	0.155189
HENMT1	1.24831	0.319979	0.00369173	0.0779791
AC023157.3	1.24825	0.319911	0.00738194	0.115679
TRIP13	1.24822	0.319872	0.0213874	0.213279
C20orf197	1.24814	0.319784	0.00608813	0.104924
RPS15A	1.24799	0.319608	9.59352e-06	0.00158313
NKX2.5	1.24787	0.319473	0.0120734	0.155278
UBR5	1.24784	0.319431	0.0013666	0.0421768
NUDT1	1.24778	0.319369	0.00012714	0.00889543
KCNJ14	1.24777	0.319355	0.000317404	0.016242
RNF126P1	1.24754	0.31909	0.00259217	0.0631145
AP005230.1	1.24754	0.319084	0.0291364	0.248309
DDX28	1.24751	0.319054	2.91619e-05	0.00337551
AC097263.1	1.24714	0.318624	0.000110567	0.0081595
AC091133.2	1.24709	0.31857	0.000541104	0.0229764
SNORD15B	1.24708	0.318548	0.0155418	0.179713
PIMREG	1.24701	0.318477	0.0312987	0.256786
RPS7P10	1.24697	0.318432	0.000805745	0.0295572
AC093249.6	1.24695	0.318401	0.00147382	0.0443212
AC016596.2	1.24693	0.318375	0.0086807	0.128019
RPS6P12	1.24685	0.318283	0.000227723	0.0132065
AC068987.1	1.24682	0.318258	0.000418557	0.0195018
AC016582.1	1.24674	0.318163	0.00203585	0.0540748
ZFYVE9	1.2467	0.318109	0.00134492	0.0417785
KCTD21.AS1	1.24667	0.318079	0.000481054	0.0212588
SLC25A24P2	1.24657	0.317959	1.26004e-05	0.00189683
BMPR1B	1.24651	0.317895	0.0216037	0.214266
IGSF1	1.2465	0.317888	0.00352292	0.075848
PDCD6IPP2	1.24648	0.317855	7.15857e-06	0.00128516
AMER1	1.24632	0.317678	0.000166471	0.0106953
GPR3	1.24631	0.317666	0.000913111	0.0322025
AC105460.2	1.24628	0.317629	0.00814476	0.123248
RRN3P1	1.24623	0.317572	0.000269074	0.0145897
CFAP58.DT	1.24606	0.317377	0.00317827	0.0713592
AC005537.1	1.246	0.317305	0.000414824	0.0194088
AL033384.1	1.24594	0.31723	0.00727474	0.114665
INTS8	1.24591	0.317203	3.99038e-05	0.00414465
AC093635.1	1.24573	0.316986	0.000479899	0.0212528
XPNPEP3	1.24567	0.316922	5.4103e-06	0.00105598
PIP5KL1	1.24552	0.316751	0.00617598	0.105665
RPL7	1.24539	0.316593	4.79722e-05	0.0047721
NIFK	1.24534	0.316544	4.1201e-06	0.000866936
CENPN	1.24531	0.316509	0.00237473	0.0596004
AL121929.2	1.24513	0.316292	0.0148594	0.174976
CCNYL2	1.24509	0.316248	0.0392202	0.288397
PNMA8A	1.24508	0.316235	0.0477314	0.316523
AC010969.1	1.24505	0.3162	0.000122276	0.00871757
SLC17A9	1.24502	0.316174	0.0393763	0.288662
PA2G4	1.24502	0.316172	2.23527e-06	0.000557361
PRR20G	1.24473	0.315831	0.0092577	0.133071
AC079140.5	1.24469	0.315781	0.0036686	0.0777716
MARS2	1.24455	0.315625	0.00169517	0.0482888
DIPK2A	1.24411	0.315111	0.0380464	0.283935
SLC25A33	1.24406	0.315057	0.000171548	0.0108963
TSKS	1.24352	0.314429	0.0073563	0.115405
RNU6.1011P	1.2434	0.314286	0.00868032	0.128019
BAALC.AS2	1.2432	0.314059	0.000125511	0.00884156
RPS3	1.24316	0.314012	0.000174191	0.0110097
AC004967.1	1.24306	0.313891	0.000533271	0.0228966
METTL8	1.24294	0.313756	1.68053e-05	0.00229119
AL133353.1	1.24276	0.313552	0.0200421	0.205772
AC008443.7	1.24276	0.313545	0.00320863	0.0716996
AL360181.1	1.24273	0.313514	0.0410951	0.29437
CAPN15	1.2427	0.313479	0.000100779	0.00777155
RNVU1.1	1.24269	0.313466	0.00610134	0.104993
LTO1	1.24216	0.312846	0.00811944	0.123112
CA8	1.24207	0.312744	0.004524	0.0883291
ZNF618	1.24203	0.312701	0.0101819	0.140797
LINC00896	1.24203	0.312699	0.00156133	0.0458554
CCT7	1.24202	0.312686	4.76569e-08	3.50321e-05
AHCY	1.24165	0.312254	1.41546e-05	0.00205225
AC008267.5	1.24148	0.312063	0.00971464	0.137124
NDUFS5P2	1.24148	0.312056	0.000323447	0.016449
GAST	1.24142	0.311993	0.0111531	0.148754
RPS8	1.2414	0.311964	8.77778e-06	0.0014818
MTDH	1.24131	0.311862	0.000607957	0.0246325
GINS4	1.24065	0.311094	0.0076113	0.118065
MIR4666A	1.24049	0.310907	0.0263594	0.237348
MRPS2	1.24046	0.31088	5.10876e-05	0.00495996
LINC00355	1.24014	0.310506	0.0473372	0.315382
RPL41P2	1.2401	0.310452	0.00275087	0.0653948
DUS2	1.24009	0.310444	5.04223e-05	0.00491874
PRELID3A	1.24	0.310344	0.0162358	0.183393
ADM2	1.23987	0.310187	0.0293275	0.249267
NCBP2.AS2	1.2398	0.31011	8.30203e-06	0.00142397
KPNA2	1.23976	0.310055	0.00704138	0.113261
AC104066.1	1.23974	0.310037	8.12067e-05	0.0067003
NOC2L	1.23949	0.309746	2.62819e-06	0.000633025
TIMM13	1.23941	0.309652	0.000110142	0.00815432
LINC01569	1.23939	0.309634	0.00307936	0.0698868
DLGAP3	1.23917	0.309376	0.00075973	0.0283469
HPN	1.23896	0.30913	0.033929	0.267644
RAB6B	1.23853	0.308631	0.0388159	0.287122
TMEM220	1.23834	0.308402	0.00119767	0.0388484
AC005726.3	1.2382	0.308242	0.015227	0.177415
TBRG4	1.23798	0.307988	7.79195e-08	4.90044e-05
SFXN4	1.23741	0.307322	6.30742e-05	0.00567769
RF00019.385	1.23722	0.307106	0.00478043	0.0911664
RPL13A	1.23722	0.307102	4.04884e-05	0.0041973
AP002748.3	1.23716	0.307037	0.00402349	0.0821564
CBSL	1.23709	0.306949	0.000279031	0.0148857
AP001574.1	1.23683	0.306649	0.0215627	0.213971
RUVBL2	1.23666	0.306452	3.84667e-06	0.000830305
CIP2A	1.23656	0.30633	0.00655725	0.10955
AC079250.1	1.23644	0.306197	0.00268927	0.0645812
ANAPC7	1.23632	0.306047	1.0147e-06	0.000308785
AC005726.1	1.23627	0.305999	0.00223897	0.057422
HMGA1	1.23577	0.305411	0.0156798	0.180503
NCL	1.23566	0.305283	3.5462e-05	0.00387495
DCUN1D5	1.2356	0.305211	0.00125059	0.0398794
AC243830.2	1.23543	0.305013	0.00338003	0.0738104
FGFBP2	1.23534	0.304911	0.00465123	0.0897566
AC021106.1	1.23527	0.304831	0.0179895	0.192922
RNU6.481P	1.23519	0.304738	0.0260232	0.235888
AL445072.1	1.23516	0.304696	0.000833058	0.0302649
NDUFB9	1.23514	0.304672	8.57751e-05	0.00690618
ASH1L.AS1	1.23506	0.304578	0.000175131	0.0110387
AC090809.1	1.23501	0.304528	0.0214869	0.213669
C20orf27	1.23492	0.304416	0.000370986	0.0181178
SNRPGP2	1.23486	0.304352	0.000167164	0.0107155
ALG1L3P	1.23486	0.304343	0.00599853	0.104008
PCDHB4	1.23474	0.304213	0.020391	0.207659
RAD51	1.23462	0.304066	0.000893304	0.0317606
PTP4A3	1.23456	0.303993	0.0196274	0.203397
LINC00659	1.23454	0.303971	0.000308504	0.0159614
FABP5P11	1.23448	0.303905	0.000584035	0.0239895
MYCNOS	1.23442	0.303838	0.0111832	0.148975
PQLC2L	1.23427	0.303655	0.0105405	0.14404
ZIC5	1.23424	0.303625	0.0169092	0.186896
AL353693.1	1.23421	0.303582	0.0120108	0.154951
JARID2	1.23416	0.303534	0.00915519	0.131993
HOXC.AS3	1.23414	0.303501	5.48478e-05	0.00519147
RPLP1P6	1.2341	0.303463	0.00233869	0.0591222
AC092115.3	1.23391	0.303233	0.00365116	0.0774788
HOXD.AS2	1.23387	0.303186	0.0361159	0.275577
LINC01967	1.23381	0.303122	0.00108507	0.0364276
AL773545.3	1.23378	0.303086	0.0404758	0.292258
AC093151.2	1.23356	0.302826	0.00428715	0.085384
RPS2P5	1.23338	0.302614	0.0254366	0.233344
C2CD6	1.23325	0.30246	4.98302e-05	0.00487974
FXN	1.23317	0.30237	3.92825e-05	0.00412518
CRKL	1.23292	0.302084	0.00154874	0.0456989
RPS21	1.23261	0.301714	8.19326e-05	0.00672149
AC011445.2	1.2326	0.301699	0.0447169	0.306091
MTRNR2L12	1.23256	0.301658	0.0499091	0.322948
AL589843.2	1.23242	0.3015	2.86109e-06	0.000666433
AC138649.1	1.23241	0.301481	0.00343436	0.0746689
NDC1	1.23237	0.301441	0.000156906	0.010315
HGH1	1.23224	0.301282	7.80861e-05	0.00652855
LINC01311	1.23201	0.301012	0.00227671	0.0579979
EME1	1.232	0.301006	0.00367918	0.0778573
FRS2	1.23197	0.300969	0.0198227	0.204522
PLXNA1	1.23191	0.300893	0.00558812	0.0999997
UQCC3	1.2318	0.300771	0.000346944	0.0171659
ARMH4	1.2317	0.300655	0.00098667	0.0339393
RECQL4	1.2317	0.300649	0.0127036	0.160364
DTD2	1.23168	0.300622	0.00030561	0.015899
HEATR1	1.23163	0.300563	0.00179507	0.0500022
HIST1H2APS4	1.23148	0.300394	0.000165605	0.0106518
CTU1	1.23144	0.300346	0.00168046	0.0480633
LINC01748	1.2314	0.300296	0.0252265	0.23246
WDR75	1.23136	0.300252	2.0298e-05	0.00258988
PSRC1	1.23133	0.300215	0.00858249	0.127169
RIMS4	1.2313	0.300182	0.014439	0.172094
SGO1	1.23118	0.300043	0.00832464	0.124885
SMYD3	1.23102	0.299854	0.010465	0.143456
UFSP1	1.23101	0.299847	0.00399011	0.0817994
KIF21A	1.23054	0.299288	0.0116257	0.152263
CENPM	1.23051	0.299252	0.00458126	0.0888285
AL928654.4	1.23046	0.299201	0.00731774	0.115055
FIGNL2	1.2302	0.298894	0.000112188	0.00823616
AL132780.4	1.23007	0.29874	0.00725931	0.114582
AC021054.1	1.23004	0.298703	0.00238827	0.0597088
ST20	1.23004	0.298701	0.0088123	0.129054
IFFO2	1.22987	0.298507	0.0440234	0.304014
AC034229.4	1.22986	0.298491	0.00397665	0.0816419
ZNF730	1.22976	0.298373	0.00312885	0.0706795
AC104564.4	1.22973	0.298341	0.00579315	0.101994
AC093515.1	1.2297	0.298312	0.0478618	0.316962
AC074117.2	1.22946	0.29803	4.26926e-05	0.0043462
ADGRV1	1.2294	0.297956	0.00553616	0.0994786
AC007128.2	1.22884	0.297302	0.00490727	0.0924945
RPS7	1.22873	0.297166	2.11357e-05	0.00266837
AC020765.2	1.22867	0.2971	0.0217433	0.21486
GBGT1	1.22865	0.297076	0.00954681	0.135465
NKX6.3	1.22856	0.296964	0.0019724	0.0530114
AC022144.1	1.22848	0.296876	0.00443668	0.0873937
LINC01842	1.22839	0.296767	0.0334387	0.265921
HSPE1	1.22827	0.296633	7.11315e-05	0.00611882
PABPC3	1.2282	0.296549	0.00129279	0.0406751
CARM1	1.22806	0.296376	0.000309871	0.016003
AL162151.2	1.22804	0.296358	0.0211117	0.211757
CIAPIN1	1.22799	0.296299	3.96311e-06	0.000843308
NOP56	1.22782	0.296102	4.12795e-05	0.00426369
RPL13AP7	1.2278	0.296081	0.000284207	0.0151165
RPS2P55	1.2278	0.29607	0.000632713	0.025213
ZFP64	1.22753	0.295758	2.74273e-05	0.00323281
CLTCL1	1.22748	0.295702	0.0181877	0.194197
RPS19	1.22746	0.295678	0.000448179	0.0203922
MIF.AS1	1.22745	0.29566	0.00660266	0.110016
MRTO4	1.22717	0.295334	4.96845e-06	0.000997249
MAPK12	1.22699	0.295128	0.00952227	0.135252
EPPK1	1.22687	0.294982	0.0447137	0.306091
LRRC69	1.22685	0.294961	0.00199697	0.0534686
OCA2	1.22654	0.294595	0.00283749	0.0667024
CPSF6	1.22651	0.294559	0.000389059	0.0186465
AL353796.1	1.22629	0.294299	0.000124811	0.00880867
FBRSL1	1.22576	0.293675	0.000242136	0.0136026
INCENP	1.22575	0.293667	0.0103627	0.142401
SATB1.AS1	1.22575	0.293666	0.00290263	0.0674722
AC099796.1	1.22574	0.293653	0.0128171	0.160967
AC002091.2	1.22573	0.293647	0.000756292	0.0283119
RF00019.362	1.22569	0.293594	0.0124788	0.158582
DLGAP1.AS3	1.22565	0.293543	0.0426133	0.299706
TRMT12	1.22561	0.293501	0.000746398	0.0281349
CNTD2	1.22556	0.293437	0.0257751	0.234755
AC002091.1	1.2255	0.293372	0.00163258	0.0471227
TP53I11	1.2255	0.293371	0.047577	0.316137
ALDH1L2	1.22545	0.293315	0.0337984	0.267336
ALKBH2	1.22545	0.293308	0.00057941	0.0239036
AC107956.1	1.2254	0.293252	0.0389898	0.287538
BUB1B	1.22538	0.293231	0.0180047	0.193012
MPZ	1.22532	0.293155	0.0113867	0.150311
HOTAIR	1.22528	0.293116	0.011547	0.151585
ASNSP1	1.22515	0.292954	0.00518978	0.0957158
RIOK1	1.22508	0.292871	0.000331319	0.0166234
KIF23	1.22501	0.292792	0.0155199	0.179607
PIF1	1.2249	0.292661	0.00781241	0.120065
AC106791.1	1.22479	0.292538	0.00202242	0.0538191
PLPPR1	1.22477	0.292506	0.0245233	0.229661
KIF18B	1.22475	0.292493	0.0265194	0.238111
PKD1P6	1.22474	0.292471	0.00295744	0.0683253
AC078925.4	1.22471	0.292446	0.0008802	0.0313625
AC012512.1	1.22467	0.292399	0.0105805	0.144249
ZFAS1	1.22466	0.292385	0.00206875	0.0546566
AUNIP	1.22458	0.292293	0.00656486	0.109621
RPS7P1	1.22455	0.292253	0.0011629	0.0381816
RGMA	1.22455	0.29225	0.0166688	0.185289
FGFBP3	1.22446	0.29214	0.0110603	0.147964
AL121832.2	1.22437	0.292041	0.0142991	0.171157
RPS5	1.22418	0.291815	0.00010406	0.00792732
SNORD12B	1.22374	0.291298	0.0431893	0.30184
PDCD2L	1.22328	0.290754	0.000640428	0.0254372
LRP4	1.22313	0.290573	0.0481978	0.317891
KLF2P4	1.22309	0.290536	0.00414777	0.0836682
CHCHD4	1.22303	0.29046	0.000422976	0.0195919
AC006001.2	1.22298	0.2904	0.00361427	0.0771108
ATP1B3	1.22277	0.290158	0.00446192	0.0876125
DARS2	1.22266	0.290024	0.00351387	0.0757684
POLR1B	1.22261	0.289958	0.000806833	0.0295779
RF00604	1.2226	0.289957	0.0246802	0.230348
PCAT6	1.22256	0.289908	0.0405547	0.292604
OIP5	1.22245	0.28978	0.0132661	0.164259
LINC01956	1.22244	0.289761	0.00989528	0.138431
ANKS6	1.22228	0.289579	0.00995255	0.138752
CAND1	1.22222	0.289507	0.00407149	0.0828972
YWHAZ	1.22208	0.289342	0.00321734	0.0718163
RPP25L	1.22203	0.289283	0.00057108	0.0237329
AC027702.1	1.222	0.289246	2.74322e-05	0.00323281
AC141557.2	1.2219	0.289127	0.0335727	0.266451
HIST1H1B	1.22187	0.289096	0.0162996	0.183461
AL158835.2	1.22186	0.28908	0.00114993	0.0379302
AL078590.2	1.22172	0.288918	0.0321013	0.260556
UBE2T	1.2216	0.288768	0.00430172	0.0855537
CHD7	1.22158	0.288754	0.00503709	0.0940289
AL512353.1	1.22135	0.288479	0.00010714	0.00806431
STIP1	1.22134	0.288466	2.2132e-05	0.00275928
CKS2	1.22124	0.288349	0.00488334	0.0922279
PSMD5	1.221	0.288059	0.00135573	0.0419558
ALDH16A1	1.2208	0.287824	0.000622794	0.0249303
NUP93	1.22075	0.287772	2.90086e-05	0.00336464
PCAT1	1.22066	0.287666	3.91047e-05	0.00411413
MFSD3	1.22056	0.287539	0.00597173	0.10373
AL591846.2	1.22012	0.287018	7.53185e-05	0.00637247
GLTP	1.22011	0.287013	0.0288869	0.247287
PRR22	1.22	0.286882	0.0117043	0.152999
NPTX2	1.21994	0.286805	0.0400398	0.290817
IGSF10	1.2199	0.286768	0.00177797	0.0496725
C19orf73	1.21984	0.28669	0.00795969	0.12134
KIF18A	1.2198	0.286647	0.0149995	0.175959
AC021074.1	1.21948	0.286269	0.000755514	0.0283015
TICRR	1.21944	0.286219	0.00328708	0.0726731
AP003555.3	1.21944	0.286216	0.0145191	0.172685
PPIE	1.2192	0.285933	6.84993e-05	0.00599326
TMEM147.AS1	1.21916	0.285887	0.0155835	0.179976
CLCNKB	1.21884	0.28551	0.00186607	0.0511988
AL031123.2	1.21864	0.285272	0.00124214	0.0396548
AC120036.4	1.21863	0.285265	0.000550124	0.0231325
TRBV20OR9.2	1.2186	0.285229	0.000201663	0.0121173
POLR3G	1.21856	0.285182	0.0180572	0.193318
NIPAL2	1.21848	0.285078	0.0230932	0.222944
AC006357.1	1.21846	0.285053	0.0011012	0.0367729
Z95115.1	1.21826	0.284823	0.00329072	0.0726731
RPS7P11	1.21812	0.284652	0.000822399	0.0299546
FSIP2.AS1	1.21809	0.284622	0.00273889	0.0652469
CXorf67	1.21804	0.284563	0.00945988	0.134772
RNU6.574P	1.21797	0.284479	0.0136821	0.166832
CMSS1	1.21789	0.284387	0.000355036	0.0174545
GART	1.21788	0.284376	0.000393988	0.0187557
AC138207.4	1.21762	0.284066	0.000518611	0.0224451
TSLP	1.21762	0.284064	0.00319982	0.0715874
LRPPRC	1.2176	0.284042	7.30263e-05	0.00623444
AC004453.1	1.21755	0.28398	0.0180406	0.193318
AC074117.1	1.21749	0.283906	0.00307845	0.0698868
AC010761.2	1.21738	0.283785	0.00984962	0.138134
MHENCR	1.21733	0.283725	0.0126694	0.16007
ATP4A	1.21732	0.283706	0.000401185	0.0189232
ART5	1.21731	0.283702	0.0121942	0.156308
AC008752.1	1.21731	0.283694	9.92913e-06	0.00162038
AC011445.1	1.21724	0.283611	1.21951e-05	0.00185556
BEND3P1	1.21719	0.283559	0.0137003	0.166851
TEKT2	1.21707	0.283412	0.0152189	0.17739
NDUFAF2	1.21701	0.283338	0.000227478	0.0132058
ZNF257	1.21692	0.28324	0.0312632	0.256755
ENDOG	1.21692	0.283233	0.00068536	0.0266292
SLC13A5	1.21691	0.28322	0.000149235	0.00996107
ELOBP2	1.21688	0.283184	0.00390169	0.0805411
C5orf30	1.21665	0.282914	0.0119052	0.15413
LINC02600	1.21663	0.282894	0.017874	0.192339
MRPL4	1.21652	0.282756	2.77965e-05	0.00325743
LINC01300	1.21621	0.282397	0.0332166	0.265224
FLVCR1	1.21619	0.282371	0.0136652	0.166734
SHOC1	1.21617	0.282349	0.000225108	0.0131086
RNU6.353P	1.21611	0.282273	0.0166147	0.185136
AL121949.1	1.2161	0.282267	0.0108736	0.14661
TUFM	1.2161	0.28226	1.53983e-05	0.0021771
DPY19L2P1	1.21603	0.282181	8.18118e-05	0.00672149
ADGRD1.AS1	1.21599	0.28213	0.000491287	0.0215147
AC130686.1	1.21594	0.282076	8.13241e-05	0.0067003
TDG	1.21593	0.28206	0.00124036	0.03962
RN7SKP269	1.2159	0.282023	0.000337202	0.0168458
AC002550.2	1.21586	0.281972	0.00323856	0.072102
SLC7A1	1.2156	0.281672	0.044624	0.305987
ATP1A3	1.2156	0.28167	0.0390786	0.287952
ZIC1	1.21556	0.281617	0.00417347	0.0840615
SNHG5	1.21553	0.281587	0.0440326	0.304014
POLQ	1.21551	0.281564	0.00706236	0.113281
RNA5SP284	1.21551	0.281562	0.00252297	0.0620623
TXN	1.21541	0.281442	0.00252876	0.0621485
RNU6.1042P	1.21538	0.281411	0.000834906	0.0302932
PI4KAP2	1.21532	0.281331	0.0477382	0.316523
SOX30	1.21526	0.281264	1.47657e-05	0.00211052
RPLP0	1.21518	0.281172	7.91992e-05	0.00657743
AL122020.1	1.21511	0.281084	0.0106889	0.145052
TGS1	1.21507	0.28104	0.00115563	0.038074
UTP23	1.21502	0.280977	0.000262519	0.0143984
GEMIN8P4	1.21498	0.280934	0.00182209	0.0505149
C17orf53	1.21487	0.280803	0.00292836	0.067848
PPP1CC	1.21486	0.280795	4.92454e-06	0.000994541
DPH5	1.21476	0.280673	3.1722e-06	0.000726934
TIMM8A	1.21458	0.280463	5.92306e-05	0.00543366
C12orf66	1.21457	0.280451	0.000224066	0.0130748
TMPRSS11A	1.21456	0.280436	0.0432005	0.301881
AL158801.5	1.21456	0.28043	0.000314695	0.016149
ANKRD16	1.21452	0.280383	0.000355887	0.0174709
CD3EAP	1.21434	0.280178	0.00186124	0.0511656
POGK	1.21433	0.280164	0.0215102	0.213701
ATP5MC3	1.21412	0.279909	3.15178e-05	0.00353827
AC008738.2	1.21399	0.279752	0.00815582	0.123333
SINHCAF	1.21392	0.279669	0.0101638	0.140666
CDCA4	1.2138	0.279536	0.0071736	0.114024
MTERF3	1.21375	0.279471	0.000277667	0.0148619
NUP37	1.21349	0.279162	1.95724e-05	0.00255262
NAA25	1.21344	0.279103	0.000400621	0.0189124
RSKR	1.21341	0.279069	0.0155957	0.180037
ANKDD1B	1.21332	0.278965	0.00185975	0.0511495
WDR5	1.21322	0.278843	0.000320849	0.016372
CRACR2A	1.21299	0.278563	0.0132482	0.16423
PDCD11	1.21288	0.278431	2.41602e-05	0.00294858
GOT1	1.21269	0.278216	0.00026696	0.0145158
AC009118.2	1.21248	0.277957	1.14592e-05	0.00178681
AL512326.3	1.21246	0.277932	0.00841754	0.125679
MTPAP	1.21233	0.277778	3.55476e-05	0.00387681
EFNA3	1.21229	0.277738	0.0368088	0.278044
TTC30A	1.21211	0.277523	0.00378735	0.0790748
NLN	1.21202	0.277416	0.00459795	0.0890364
AC009245.1	1.21188	0.27725	0.000613267	0.0247414
PPOX	1.21186	0.277225	0.0078254	0.120134
GOLGA6L7	1.21181	0.277162	3.57567e-05	0.00389211
RPS18	1.21179	0.277143	0.000688386	0.0266877
LINC01106	1.21173	0.277063	0.00417569	0.0840615
AL445250.1	1.2116	0.276918	0.0445004	0.305458
SERPINB12	1.21158	0.276889	0.0164658	0.184371
KRTAP4.1	1.21157	0.276877	0.0293607	0.249419
UMPS	1.21149	0.276783	8.34524e-05	0.00678471
SOGA1	1.21145	0.27674	0.00444831	0.0874542
AC012618.1	1.21139	0.276664	0.00384966	0.0798748
AL606490.8	1.21136	0.276628	5.59701e-05	0.00523639
SBNO1	1.21135	0.276619	0.000733187	0.0278709
FAM222A.AS1	1.21126	0.276514	0.000599165	0.0243913
ZC3H8	1.21121	0.276446	0.000284968	0.0151311
CELF5	1.21109	0.276307	0.000276619	0.0148409
TIMM44	1.21108	0.276294	3.40903e-06	0.000765705
CCDC144NL.AS1	1.21094	0.276127	0.0410264	0.294203
GPR158	1.21093	0.27611	0.0207954	0.210228
DBF4	1.21092	0.276099	0.00153892	0.0454629
AC120036.3	1.21077	0.275923	0.0143364	0.171522
MKRN3	1.2107	0.275838	0.0361323	0.275607
TCP11	1.21065	0.275779	1.90013e-05	0.00250632
ABCC1	1.21054	0.275654	0.00616584	0.105597
SLC22A1	1.21037	0.275446	0.0105249	0.143896
ATP5F1B	1.21035	0.27542	4.41019e-05	0.0044576
RANBP1	1.21028	0.275343	0.000865024	0.0310363
H2AFX	1.2102	0.275246	0.00452699	0.0883291
AC006305.1	1.21017	0.275206	0.0129507	0.162068
DUSP23	1.21011	0.275138	0.0444983	0.305458
RPL4	1.21007	0.275088	0.000344823	0.0171044
NOP58	1.20986	0.274844	5.18251e-05	0.00500581
RPL6P27	1.20957	0.274496	0.0100358	0.139471
AC090907.2	1.20956	0.274481	0.00685995	0.111963
XRCC2	1.20946	0.274357	0.00670897	0.110735
AC073861.1	1.20934	0.274221	0.0124973	0.158781
IRAK3	1.20928	0.274151	0.0137891	0.167272
AZIN1	1.2092	0.274057	0.00810916	0.122989
CACNA1A	1.20908	0.273906	0.00346803	0.0750299
ELOCP21	1.20906	0.273881	1.75776e-05	0.00237453
RPL18A	1.20894	0.273741	0.000505955	0.0220293
AC093249.4	1.20893	0.273734	0.00141181	0.043172
AC245047.4	1.20883	0.273608	0.0163506	0.183731
AC005393.1	1.20879	0.273558	0.0225114	0.219612
BYSL	1.20876	0.273533	7.02501e-05	0.00610206
BCS1L	1.20869	0.273443	6.73191e-05	0.00591676
AC145423.2	1.20868	0.273431	0.0183066	0.19495
ATAD3A	1.2086	0.273334	0.000482165	0.0212717
AC010343.3	1.20856	0.273284	0.039725	0.289645
AC012174.1	1.20855	0.273276	0.00520438	0.0957536
NME4	1.20853	0.273248	0.0100589	0.139616
SNORD12C	1.20849	0.273211	0.0339757	0.267644
AC079160.1	1.20841	0.273111	0.00406781	0.0828521
AP002387.2	1.20834	0.273031	0.0341206	0.268235
DLX6.AS1	1.20821	0.272876	0.0112436	0.149497
PPIH	1.20806	0.272691	0.000286642	0.0151915
POLR1A	1.20805	0.272682	0.000306904	0.0159517
EBNA1BP2	1.20792	0.272526	0.00032008	0.0163512
RF00019.703	1.20792	0.272525	0.0123591	0.157662
SHISAL2A	1.2079	0.272496	0.00630504	0.106799
GRPEL1	1.20781	0.272393	3.04008e-05	0.00347625
MED30	1.20777	0.272343	0.00100816	0.0345095
AGO2	1.20776	0.272332	0.00422981	0.0846955
AL163051.1	1.20772	0.272289	0.00218109	0.0564448
C16orf91	1.20768	0.272236	5.81994e-05	0.0053915
MUTYH	1.20763	0.272173	0.000909789	0.0321849
DACT2	1.20755	0.272079	0.0232391	0.223616
PTGES3L	1.20741	0.271913	0.000236473	0.0134251
MRPL15	1.20738	0.271884	0.000146964	0.00985602
PPARGC1B	1.20703	0.271457	0.00705919	0.113281
WDR74	1.20702	0.271448	3.06461e-05	0.00349724
EXOSC6	1.20679	0.27117	5.31755e-05	0.00507942
GCSH	1.20657	0.270914	0.00100979	0.0345268
SNRPD2	1.2065	0.270828	8.81387e-05	0.00704636
AC012313.5	1.20648	0.270805	0.0070381	0.113261
MRLN	1.2064	0.270705	0.000766476	0.0285421
GINS1	1.20638	0.270684	0.0161012	0.182885
PNO1	1.20628	0.270566	4.25625e-05	0.0043462
ACY1	1.20622	0.27049	0.00883417	0.129207
RNU6.216P	1.20609	0.270333	0.0134872	0.165584
COX4I1	1.20608	0.270325	0.000374174	0.0182266
AL021878.2	1.20601	0.270242	0.00521377	0.0958772
LINC01322	1.20596	0.27018	0.02656	0.238324
AC005840.2	1.20583	0.270027	0.0134829	0.165584
NAB1	1.20581	0.27	0.0151856	0.177187
AC098484.2	1.20575	0.269933	0.000426839	0.0197224
MRPL21	1.20573	0.269911	0.000955609	0.0333162
DPH2	1.2057	0.269868	0.000423857	0.0196167
SNORA13	1.20557	0.26971	0.0308781	0.254962
SNRPA	1.20555	0.26969	1.68347e-05	0.00229119
SNORD46	1.20553	0.269669	0.0288798	0.247287
NSUN5	1.20542	0.269535	0.0012181	0.0392413
ATE1	1.20542	0.269531	0.00225251	0.0576385
RPS10	1.20516	0.269224	0.000325166	0.0164625
RPL41	1.20513	0.269184	8.78145e-05	0.00703038
LINC01394	1.20509	0.26914	0.000302064	0.0157858
CABP7	1.20504	0.269079	0.0189737	0.199425
AHSA1	1.20485	0.268852	1.84293e-06	0.000480708
NDUFA6	1.20476	0.26875	8.30845e-05	0.00677056
TADA1	1.20472	0.268694	0.00574707	0.101532
MTFP1	1.20459	0.268541	0.00312596	0.0706611
ARHGEF33	1.2044	0.268311	1.39655e-05	0.00204257
AC116351.2	1.20428	0.268173	0.00875003	0.128435
THAP4	1.20425	0.268137	2.74857e-05	0.00323281
GINS3	1.20416	0.268029	0.00461796	0.0893017
CES4A	1.20413	0.267995	0.0358207	0.274539
BOLA2B	1.20377	0.267564	0.00149717	0.0447429
NDUFS2	1.20374	0.267519	0.000931483	0.0327071
CNOT2	1.20365	0.267412	0.00145728	0.0440153
AC021106.3	1.20363	0.267392	0.0247392	0.230538
POLR2K	1.20351	0.26725	0.00372495	0.0783208
GRB10	1.20332	0.267016	0.0468036	0.313735
DLGAP1	1.20325	0.26694	0.0197174	0.203885
LMNB1	1.20323	0.266914	0.0300891	0.252162
SACS	1.2031	0.266757	0.0302459	0.252523
ZNHIT2	1.2031	0.266754	0.00246809	0.0610838
MND1	1.20297	0.266601	0.0124001	0.158008
METTL26	1.20295	0.26658	0.0032664	0.0724469
ULBP1	1.20295	0.266572	0.0204847	0.208277
AC025062.1	1.20294	0.266566	1.06432e-05	0.00169221
HAS2.AS1	1.20285	0.26646	0.0448101	0.30644
EEF1A1P6	1.2027	0.266277	0.0132067	0.163895
TOMM20	1.2026	0.266152	4.26827e-05	0.0043462
AL139011.1	1.20248	0.266012	0.0026229	0.0635467
TATDN1	1.20236	0.265866	0.000192996	0.0117715
FAM72A	1.20232	0.265826	0.000461057	0.0208274
CDC25A	1.20226	0.265747	0.0111644	0.148759
KCNQ5	1.20223	0.265715	0.0051406	0.0950308
GYS1	1.20221	0.26569	0.000245818	0.0137488
TIMM50	1.20219	0.265665	0.000138638	0.00946587
TNFRSF13C	1.2021	0.265559	0.0155984	0.180037
HOXC12	1.20203	0.265473	0.0114163	0.150415
MDH2	1.20203	0.265472	1.20597e-05	0.00183989
HOXC.AS2	1.20202	0.265464	0.000647531	0.0256125
AL358394.1	1.20188	0.265298	0.00224679	0.0575702
TAF5	1.20183	0.265229	4.40529e-05	0.0044576
LRRC43	1.20165	0.265011	0.000746292	0.0281349
RNF126	1.20155	0.264891	4.8323e-05	0.0047976
FARSB	1.20153	0.26487	0.000337807	0.0168612
MAFA.AS1	1.20148	0.264816	0.0452297	0.307962
CCKBR	1.20142	0.264746	0.0150369	0.176097
SDHC	1.20134	0.264646	0.00251629	0.0619787
INSM1	1.20111	0.26437	0.0297821	0.25092
GJA3	1.20092	0.264138	0.0132064	0.163895
AC103591.2	1.20086	0.264068	0.000795616	0.0293187
RPS11	1.20076	0.263954	0.000304436	0.0158726
SPC25	1.20076	0.263943	0.0228634	0.221569
TAS2R2P	1.20053	0.263666	1.24713e-06	0.000354723
HIST1H4D	1.20042	0.263545	0.0489081	0.319886
TEDC2	1.2004	0.263521	0.0113101	0.149924
AC120036.1	1.20031	0.263409	0.000237707	0.013444
GNPNAT1	1.20027	0.263362	0.00148899	0.0447078
RPL3	1.20025	0.263334	0.000967402	0.0335932
AL512329.2	1.20021	0.263287	0.00610427	0.104993
FGF11	1.20016	0.263228	0.00430668	0.0856223
CHRNB4	1.2001	0.26315	0.0003267	0.0165069
CR392039.4	1.19998	0.263015	0.00137087	0.0422372
SLC9B2	1.19994	0.262967	0.00949056	0.135027
KCNQ4	1.19986	0.262872	0.024798	0.230858
AC012363.1	1.19986	0.262871	3.45521e-07	0.000147047
NHSL1	1.19983	0.262831	0.00963799	0.136512
LENG9	1.19976	0.26274	0.0253296	0.232919
S100A1	1.19971	0.262686	0.00324052	0.072102
CR392039.2	1.1997	0.262674	0.0485094	0.318756
RPSAP7	1.19964	0.262598	0.00445941	0.0876125
DCAF4	1.1996	0.262551	0.000134058	0.00923109
RPS26P47	1.19959	0.262539	0.0156272	0.18025
RPL7P23	1.19933	0.262231	0.00117878	0.0385671
AC007773.1	1.19913	0.261984	0.0313936	0.257147
NPAS1	1.19911	0.261961	0.0186977	0.19756
AL158211.5	1.19907	0.261915	0.000399442	0.0188935
REEP4	1.19895	0.261775	0.00300991	0.0691143
GOT2	1.19895	0.26177	0.00186442	0.0511915
NDUFS5	1.1989	0.261713	0.00160071	0.0464901
SYT3	1.19889	0.261703	9.46142e-05	0.00737652
GTPBP4	1.19871	0.261484	0.000349613	0.0172765
SLC35F3	1.1987	0.26147	0.0293297	0.249267
AP000523.1	1.19858	0.261329	0.0101891	0.140836
AP002336.2	1.19857	0.261319	0.00513051	0.0950253
SNHG6	1.19805	0.260693	0.00564244	0.100495
COA6	1.19766	0.260219	0.000110209	0.00815432
AC105219.1	1.1976	0.260146	0.00346104	0.0750299
RTN4RL2	1.19745	0.259965	0.022858	0.221569
ZNF598	1.19739	0.259888	0.000127036	0.00889543
PIANP	1.19724	0.259709	0.029671	0.250587
Z93403.1	1.19722	0.259685	4.47458e-06	0.000924343
PWP1	1.1971	0.259545	8.56803e-07	0.000273971
SLC6A10P	1.19698	0.259402	0.00400886	0.0819713
VARS	1.19671	0.259069	0.000308318	0.0159614
CHORDC1	1.19666	0.259011	0.00504939	0.0941217
AL031123.3	1.19665	0.259002	0.000258794	0.0142493
AP001160.1	1.19662	0.258961	0.00520536	0.0957536
DENND5B.AS1	1.19658	0.258914	0.000581898	0.0239191
AC018738.1	1.19639	0.258691	0.0405237	0.292536
OBSCN.AS1	1.19614	0.25839	0.000116678	0.00848269
SKA1	1.19609	0.258325	0.0258226	0.235024
C1orf112	1.19607	0.2583	0.0237961	0.22623
RPS6KL1	1.19604	0.258269	0.0204009	0.207723
SNRPGP10	1.19604	0.258261	0.00405219	0.0826231
LINC01376	1.196	0.258212	0.00204102	0.0541413
GARS	1.19588	0.258071	0.000544605	0.0230038
ASLP1	1.19587	0.258063	0.00619536	0.105878
AK4P3	1.19579	0.257958	0.0024461	0.06067
AC091138.1	1.1957	0.257854	0.0158292	0.181516
RITA1	1.19549	0.257597	6.49085e-05	0.00578575
AL513165.1	1.19547	0.257574	0.0417687	0.296909
TBC1D31	1.19537	0.257455	0.000761374	0.0283895
DNAJA2	1.19532	0.257391	2.67394e-05	0.00317369
AC004241.3	1.19526	0.257327	0.00611762	0.105057
AP001432.1	1.1952	0.257254	0.00213753	0.05566
AL031667.3	1.19518	0.257232	0.00328247	0.0726616
DNAAF2	1.19517	0.257221	0.000248015	0.0138443
AC109322.1	1.19516	0.257201	0.00679011	0.111337
LRRC75B	1.19512	0.257157	0.0406495	0.292952
RPS26	1.19512	0.25715	0.00426814	0.0851146
CYB5B	1.19503	0.257048	0.0037994	0.0791803
USP44	1.19503	0.257047	0.0109631	0.147316
EIF3K	1.19487	0.256849	0.000717698	0.0274481
HIST2H3D	1.19473	0.256688	0.0142027	0.170571
TCOF1	1.19467	0.256617	0.000264565	0.014433
RF00019.272	1.19461	0.256534	0.00207796	0.0547454
NCAPG	1.19444	0.256335	0.0349431	0.271006
MAST1	1.19432	0.25619	0.0269806	0.240142
TSNARE1	1.19428	0.256141	0.0048902	0.092265
GTF2H3	1.19427	0.256124	0.00167401	0.0479287
PPTC7	1.19426	0.256112	0.00261526	0.0634501
ELOVL2	1.19425	0.256105	0.0263928	0.237348
AC090543.2	1.1942	0.256041	0.00307032	0.0697908
NDUFAB1	1.19396	0.255752	9.37085e-05	0.00734638
PTGR2	1.19392	0.255704	0.00274728	0.0653368
BCR	1.19388	0.255656	0.00208006	0.0547454
AL590617.2	1.19367	0.255401	0.0150219	0.17604
MMACHC	1.19358	0.255294	0.000379952	0.0183656
PLEKHG5	1.1935	0.255198	0.020681	0.209707
SLC19A1	1.19348	0.255169	0.0121949	0.156308
SREBF2.AS1	1.19315	0.25478	0.00212099	0.0554002
DTYMK	1.19292	0.254501	0.00169208	0.0482252
KNSTRN	1.19292	0.254496	0.00645319	0.108451
PRICKLE3	1.1928	0.254348	0.00410644	0.0833145
GRIP1	1.19261	0.254128	0.0484936	0.318722
CFAP47	1.19261	0.254125	0.00756593	0.117683
AC012146.3	1.1924	0.253871	1.60084e-05	0.00224621
DYRK3	1.19238	0.253844	0.00686745	0.11203
RPL24P4	1.19238	0.253843	0.0200563	0.205806
AC006111.2	1.19232	0.253772	0.00778746	0.119714
CLUH	1.19232	0.25377	0.00150588	0.0449556
WDR36	1.19229	0.253733	0.00145233	0.0439539
AC011997.1	1.19229	0.253732	0.00280882	0.0662737
AC010422.2	1.19226	0.253696	0.00737137	0.115609
PLAC8L1	1.1922	0.253622	0.0129842	0.162201
RPL36	1.19209	0.253499	0.00294174	0.068018
RNU6.45P	1.19208	0.253481	0.0258202	0.235024
ATAD2	1.19203	0.253421	0.0420685	0.297943
LRRC8B	1.19202	0.253405	0.0149955	0.175959
MID1IP1.AS1	1.19184	0.253191	0.0418873	0.297179
LRRC73	1.19168	0.252996	0.0115522	0.151585
AC002351.1	1.19164	0.252944	0.00298069	0.0686139
LINC00543	1.19154	0.252822	0.0241023	0.227557
CCDC138	1.19136	0.252609	0.00328648	0.0726731
LINC01587	1.19121	0.252432	1.8478e-05	0.00246672
MRPL16	1.19115	0.252356	0.00131892	0.0411996
KIRREL2	1.19104	0.25222	0.00414048	0.0836682
MMAB	1.19101	0.252187	0.00062435	0.0249572
POLR3B	1.19099	0.252166	0.00068894	0.0266909
LGSN	1.19093	0.252093	0.00686809	0.11203
AL133153.2	1.19092	0.252081	0.00122202	0.0392527
MRPL19	1.19079	0.251916	0.000177669	0.0111244
CTPS1	1.19073	0.251843	0.0127503	0.160662
MASTL	1.19072	0.251836	0.00427419	0.0851558
RIOX1	1.19068	0.251782	0.0048555	0.091981
NDUFAF4	1.19066	0.25176	0.000308784	0.0159614
PPP1R14B	1.1906	0.251685	0.00263101	0.0635598
ZNF581	1.19057	0.251651	0.000814418	0.0297597
RF00019.545	1.19045	0.251511	0.0189973	0.199425
AC104619.1	1.1904	0.251442	0.00304474	0.0694072
PRSS51	1.19038	0.251419	0.00897702	0.130588
AP005435.1	1.19036	0.251401	0.0096401	0.136512
HDHD5.AS1	1.19031	0.251334	0.0204496	0.208069
CROCC	1.19028	0.251299	0.00571421	0.1012
RPS15AP11	1.19021	0.25121	0.000360575	0.0176704
TIGD1	1.1902	0.251198	0.00287182	0.0670313
AC084357.2	1.19017	0.25117	0.0105498	0.144133
AC006033.1	1.19017	0.251168	0.00481292	0.0915392
DEXI	1.19014	0.251126	0.000799052	0.0293688
GNB1L	1.19009	0.251069	0.00449362	0.0879616
SHD	1.19004	0.251011	0.00868279	0.128019
PABPC1P3	1.18997	0.250924	0.0170651	0.187605
E2F4	1.18996	0.250911	0.000328986	0.0165821
DTL	1.18993	0.250882	0.0312881	0.256786
LINC01977	1.18991	0.250847	0.037524	0.281951
AC010809.2	1.18989	0.250825	0.00474425	0.0906967
CLCN2	1.18968	0.250578	0.00305839	0.0696343
RPL37A	1.18967	0.250562	0.00152186	0.0452654
BCCIP	1.18939	0.250222	2.98739e-05	0.00342694
RPS27A	1.18929	0.250095	2.00419e-05	0.00256654
NPM1	1.18922	0.250014	0.0018649	0.0511915
XYLB	1.18914	0.249921	0.0298138	0.25092
SPDL1	1.18912	0.24989	0.00456755	0.08866
AC002116.2	1.18887	0.24959	0.0047791	0.0911664
KATNB1	1.18886	0.249573	0.000122466	0.00871927
CCT4	1.18877	0.249466	0.00108904	0.0364485
MBIP	1.18877	0.249465	0.0189976	0.199425
AL121658.1	1.18864	0.249309	0.000852435	0.0306736
IGSF8	1.18851	0.24915	0.0162574	0.183454
SNHG15	1.18847	0.249106	0.00177901	0.0496771
KCNK9	1.1884	0.249018	0.000836567	0.0302971
BOLA2P3	1.18834	0.248947	0.0404196	0.292001
RPL7P9	1.18825	0.248834	0.0338736	0.267541
NUTF2	1.18818	0.248755	0.000307876	0.0159614
RPL35	1.18806	0.248611	0.00344497	0.0748531
CNKSR3	1.18803	0.24857	0.0117938	0.153602
C8orf82	1.18792	0.248437	0.00458408	0.0888285
IARS2	1.1879	0.248415	0.00276774	0.0656302
HIST1H2AB	1.18781	0.248299	0.00482935	0.0916669
HIST2H2BD	1.18761	0.248062	0.0121048	0.155541
CHCHD7	1.18757	0.24801	0.00139632	0.0428836
RPS18P12	1.18745	0.247873	0.034754	0.270425
AC068522.1	1.18741	0.247819	0.00153894	0.0454629
SCARB1	1.18741	0.247814	0.0383044	0.284902
NFXL1	1.1874	0.24781	0.00874913	0.128435
AC073389.1	1.1874	0.247808	0.00368281	0.0778977
TMEM191B	1.18729	0.24767	0.0187708	0.198036
AC108681.1	1.18719	0.247545	8.8748e-06	0.0014818
CIDEB	1.18718	0.247541	7.72816e-08	4.90044e-05
FBXO46	1.18702	0.247345	0.00267608	0.0643559
COX6A1	1.18702	0.247345	0.0006084	0.0246328
SLCO6A1	1.18689	0.24719	0.000749013	0.028147
CYP27B1	1.18686	0.247149	0.0360113	0.2753
AC008074.2	1.18685	0.247141	0.0320359	0.260324
TDRG1	1.18679	0.247062	0.000749084	0.028147
AL353807.4	1.18677	0.247045	0.0289247	0.247422
GLI4	1.18672	0.246975	0.0317726	0.258956
LSM7	1.18666	0.246911	0.00293987	0.0680027
AC005076.1	1.18646	0.246666	0.00383655	0.0796771
FER1L6.AS2	1.18645	0.246656	0.000527253	0.0227466
NUDCD1	1.18619	0.24633	0.00306768	0.0697616
CDH8	1.18612	0.24625	0.000353041	0.0173764
CTU2	1.18611	0.246241	0.000164568	0.0106092
BOLA2.SMG1P6	1.18609	0.246213	0.00455853	0.0885152
C1orf56	1.18606	0.246182	0.0094481	0.134672
TNFSF11	1.18598	0.246083	0.0346815	0.270168
RGS6	1.18594	0.246027	0.0110589	0.147964
AF131215.7	1.18593	0.246024	0.0306194	0.254123
DPYSL5	1.18593	0.246013	0.0346639	0.270168
MPST	1.18582	0.245886	0.0195885	0.20315
HNRNPCP2	1.18577	0.245827	0.0144236	0.171987
AC021146.11	1.18576	0.245808	0.04824	0.317905
MRPS34	1.18571	0.245752	0.000230287	0.0132767
GNB3	1.18568	0.245717	0.014021	0.169083
SEZ6L	1.18556	0.245564	0.0344915	0.269439
UTP4	1.18552	0.245523	0.00160246	0.0464901
METTL1	1.1855	0.245501	0.00042148	0.0195687
CCT8	1.18548	0.245472	0.00039566	0.0187879
CSTF2T	1.18548	0.245468	0.0307832	0.254548
ZNF485	1.18543	0.245412	0.00293125	0.0678864
EMILIN3	1.18541	0.245391	0.0159521	0.182176
RAG1	1.18536	0.245326	0.00909639	0.131513
SNHG1	1.18525	0.245191	0.00718793	0.114124
RPS15AP1	1.18521	0.245143	0.00678201	0.111268
C1QBP	1.18517	0.245099	0.00669753	0.110684
DECR1	1.18516	0.245076	0.0164272	0.184267
LSM5	1.18515	0.245071	6.1296e-05	0.00557794
AC107075.1	1.18508	0.244981	0.00565895	0.100604
AL391244.2	1.18503	0.244928	0.0090256	0.130924
ZNF276	1.18496	0.244834	0.00221313	0.0569161
RPS11P5	1.18488	0.244736	0.0108026	0.14586
MRPS28	1.18482	0.244662	0.000982684	0.0338935
PPIEL	1.18473	0.244556	0.0146897	0.173838
UTP25	1.18461	0.244408	0.00135146	0.0419153
DUXAP9	1.1845	0.244274	0.000489407	0.0214873
LINC02434	1.18449	0.244261	0.0249449	0.231464
VPS35	1.18435	0.244095	0.00143213	0.0436048
GLUD1	1.1843	0.24404	0.00153142	0.0453355
TIGD7	1.18422	0.243938	0.00108664	0.0364485
EPRS	1.18418	0.243885	0.00184798	0.0508794
HYI.AS1	1.18413	0.24383	0.0175394	0.190253
DGCR6	1.18411	0.243808	0.00702195	0.113261
BICD2	1.1841	0.243797	0.013333	0.164653
AC010463.3	1.1841	0.243794	0.00677439	0.111175
[truncated: 6,760 more rows]

## Sheet: BRCA
Differentially expressed genes (DEGs) between the low-HPDL subgroup and the high-HPDL subgroup in BRCA
HPDL	8.78103	3.13439	7.22302e-236	4.08837e-231
CRABP1	7.80655	2.96468	1.64696e-37	2.73375e-35
GABRP	7.76444	2.95688	2.82041e-35	3.50089e-33
KRT16	6.62032	2.7269	2.396e-37	3.83103e-35
VGLL1	6.41244	2.68087	8.54995e-45	3.48161e-42
PROM1	6.18393	2.62852	1.60594e-44	6.40137e-42
FDCSP	5.46493	2.4502	1.27481e-19	3.04073e-18
PSAT1	5.33756	2.41618	1.25455e-50	1.315e-47
PRAME	4.994	2.32019	4.68334e-29	2.98857e-27
KRT81	4.91941	2.29848	3.99911e-22	1.23896e-20
ELF5	4.75036	2.24804	3.47391e-34	3.84795e-32
KRT6B	4.53949	2.18253	2.71049e-24	1.06172e-22
PPP1R14C	4.52781	2.17881	7.0721e-40	1.60761e-37
SFRP1	4.48085	2.16377	1.45307e-25	6.4812e-24
CT83	4.44976	2.15373	1.2275e-35	1.59355e-33
FOXCUT	4.36422	2.12573	1.08401e-44	4.38265e-42
MSLN	4.32155	2.11155	4.82341e-28	2.80303e-26
PKP1	4.28426	2.09905	3.60145e-36	4.96938e-34
ROCR	4.27942	2.09742	9.97222e-34	1.05307e-31
FABP7	4.27383	2.09553	1.22818e-26	6.21302e-25
KLK6	4.25736	2.08996	1.08541e-26	5.52982e-25
CHI3L1	4.16503	2.05833	1.99778e-32	1.83569e-30
LINC02188	4.15459	2.05471	4.95881e-45	2.12635e-42
CDCA7	4.08675	2.03095	3.12533e-62	2.64292e-58
KCNK5	4.03202	2.0115	4.08674e-54	8.90022e-51
EN1	4.01537	2.00553	4.50825e-34	4.95488e-32
GAL	3.96303	1.9866	7.71397e-48	5.67047e-45
LINC01956	3.94358	1.97951	5.11339e-40	1.19106e-37
MMP7	3.89226	1.96061	1.14926e-25	5.1833e-24
ART3	3.8115	1.93036	3.84034e-38	6.92265e-36
KRT5	3.79066	1.92245	5.83698e-17	1.05257e-15
CA9	3.77924	1.9181	1.53166e-28	9.33209e-27
HORMAD1	3.73391	1.90069	1.29513e-38	2.52782e-36
RARRES1	3.70687	1.8902	3.68813e-33	3.64958e-31
CDH3	3.69743	1.88652	1.00984e-39	2.25926e-37
A2ML1	3.63514	1.86201	5.80016e-39	1.1852e-36
UGT8	3.62864	1.85943	2.07817e-44	7.94787e-42
FOXC1	3.60845	1.85138	1.68009e-37	2.7806e-35
MYBL2	3.60121	1.84848	3.43633e-50	3.29667e-47
MIA	3.58429	1.84169	1.69938e-32	1.57171e-30
PI3	3.56411	1.83354	2.36306e-21	6.77556e-20
PADI2	3.54103	1.82417	3.51936e-36	4.87049e-34
KRT17	3.5277	1.81873	1.28498e-16	2.23587e-15
KLRG2	3.50721	1.81032	1.58901e-49	1.42764e-46
S100A9	3.48439	1.80091	6.72943e-16	1.07812e-14
BCL11A	3.46198	1.7916	5.55131e-55	1.49626e-51
LY6D	3.46102	1.7912	3.20311e-24	1.24778e-22
SLC34A2	3.43168	1.77892	4.72476e-21	1.31351e-19
KLK5	3.40928	1.76947	2.46474e-17	4.62103e-16
CP	3.37828	1.75629	1.13736e-19	2.72437e-18
CALML5	3.37368	1.75432	4.84964e-11	4.56358e-10
CDC20	3.3724	1.75377	2.76574e-68	5.21821e-64
AC020907.1	3.29349	1.71962	3.6866e-53	5.79636e-50
STAC2	3.28809	1.71725	6.44096e-17	1.15444e-15
S100A8	3.25531	1.70279	4.09119e-15	6.0399e-14
KRT23	3.21976	1.68695	1.03739e-19	2.49654e-18
TMSB15A	3.1865	1.67197	7.75405e-33	7.35167e-31
TTYH1	3.1623	1.66097	2.6867e-32	2.43706e-30
ROPN1B	3.13325	1.64766	2.59661e-37	4.1169e-35
IGHG1	3.12908	1.64574	3.16064e-12	3.39724e-11
HRCT1	3.11797	1.64061	2.78305e-28	1.65295e-26
TRIM29	3.11393	1.63874	2.279e-26	1.11203e-24
ROPN1	3.11131	1.63752	4.19789e-45	1.82776e-42
CCNE1	3.11065	1.63722	1.03755e-51	1.24952e-48
SERPINB5	3.10922	1.63655	7.42484e-21	2.02048e-19
MEX3A	3.10085	1.63266	1.71346e-47	1.18275e-44
GJB3	3.08261	1.62415	4.24894e-35	5.16474e-33
PEG10	3.07555	1.62085	8.38453e-15	1.19783e-13
KCNN4	3.01268	1.59105	7.90558e-36	1.06541e-33
MARCO	2.96898	1.56997	1.31824e-26	6.63246e-25
KRT6A	2.9635	1.5673	1.02373e-16	1.79787e-15
SLC6A14	2.94276	1.55717	9.88262e-25	4.07709e-23
KLK7	2.93071	1.55125	1.29991e-19	3.09539e-18
HAPLN3	2.92864	1.55023	1.86614e-40	4.59249e-38
INAVA	2.91986	1.5459	5.84878e-34	6.37866e-32
KRT7	2.89854	1.53533	1.00556e-19	2.42507e-18
WNT6	2.89547	1.5338	2.0797e-39	4.44208e-37
ARL9	2.8934	1.53277	1.08164e-45	5.18837e-43
DSC2	2.87921	1.52568	6.0683e-37	9.08672e-35
FZD9	2.87069	1.5214	1.82549e-48	1.3963e-45
AQP5	2.86782	1.51995	3.35814e-14	4.4978e-13
KCNQ4	2.85863	1.51533	6.58684e-61	3.72828e-57
LDHB	2.82411	1.49779	8.79957e-39	1.75378e-36
NCCRP1	2.82062	1.49601	2.45085e-16	4.12989e-15
SOX11	2.80983	1.49048	1.18264e-28	7.29848e-27
CHODL	2.78871	1.4796	4.46706e-46	2.25754e-43
AURKB	2.78168	1.47596	4.97432e-55	1.40778e-51
GLYATL2	2.78042	1.4753	2.81769e-14	3.80546e-13
PHGDH	2.77921	1.47467	4.08974e-31	3.2696e-29
COL9A3	2.77853	1.47432	6.91818e-27	3.60906e-25
KLK10	2.76603	1.46782	3.53425e-18	7.20107e-17
UBE2C	2.76458	1.46706	7.54051e-44	2.70132e-41
CENPW	2.7379	1.45307	7.95533e-54	1.45254e-50
KIF2C	2.73659	1.45238	1.04536e-58	3.69808e-55
CRYAB	2.73465	1.45136	1.06064e-20	2.83314e-19
DSC3	2.72781	1.44774	7.08578e-20	1.74e-18
KCNG1	2.72776	1.44771	1.5973e-35	2.04549e-33
RDH10	2.7163	1.44164	3.3724e-36	4.67854e-34
FOLR1	2.71426	1.44056	2.15888e-16	3.6553e-15
LAD1	2.70804	1.43725	9.01951e-27	4.6243e-25
VPS9D1.AS1	2.70358	1.43487	3.50352e-39	7.34467e-37
IMPA2	2.69501	1.43029	2.13615e-58	7.11237e-55
PLCH1	2.69158	1.42845	2.31424e-33	2.33911e-31
SLC7A5	2.69152	1.42842	8.69507e-32	7.49099e-30
KRT15	2.6869	1.42594	2.38413e-15	3.61013e-14
KIRREL3.AS1	2.67818	1.42125	4.84576e-38	8.57124e-36
RGMA	2.66843	1.41599	3.84164e-43	1.27161e-40
AC022784.1	2.65236	1.40728	4.33777e-25	1.85303e-23
BBOX1	2.65166	1.4069	2.88033e-23	1.01262e-21
NRTN	2.63266	1.39652	6.99496e-38	1.22579e-35
DEFB1	2.63247	1.39641	9.81643e-16	1.54384e-14
PTX3	2.61266	1.38552	1.22115e-23	4.46219e-22
AP000851.1	2.60192	1.37958	3.37953e-24	1.31379e-22
S100A2	2.59802	1.37741	8.97225e-17	1.585e-15
ACTL8	2.59638	1.3765	1.2881e-18	2.74611e-17
CXCL1	2.5939	1.37512	1.75735e-28	1.06158e-26
FAM171A1	2.58487	1.37009	1.54483e-35	1.98728e-33
CBX2	2.57884	1.36672	3.31362e-28	1.94966e-26
FAM83D	2.56915	1.36129	2.05307e-40	5.00896e-38
MELTF	2.56148	1.35698	5.99135e-34	6.52159e-32
SOX8	2.55203	1.35164	1.17144e-26	5.94137e-25
MCM10	2.54629	1.34839	3.24577e-48	2.41733e-45
MMP12	2.52174	1.33442	8.79516e-18	1.72552e-16
LINC01436	2.51523	1.33069	4.81928e-22	1.47689e-20
NMU	2.51438	1.3302	1.66206e-25	7.3669e-24
GPRIN2	2.51288	1.32934	2.86922e-28	1.70234e-26
CDCA8	2.5118	1.32872	1.59959e-54	4.11545e-51
TSPYL5	2.51158	1.3286	9.24569e-26	4.20004e-24
CENPA	2.50217	1.32318	2.23246e-46	1.20344e-43
LAMP3	2.49754	1.32051	1.2319e-25	5.54276e-24
GGH	2.48881	1.31546	1.48781e-38	2.88401e-36
FOXM1	2.48466	1.31305	8.53406e-39	1.70687e-36
DKK1	2.48453	1.31298	1.83852e-17	3.49091e-16
PCSK1N	2.48368	1.31248	1.77834e-15	2.72121e-14
CDKN2A	2.47769	1.30899	3.21321e-25	1.39261e-23
TCF7L1	2.47703	1.30861	1.64092e-33	1.68565e-31
GFRA3	2.47438	1.30707	8.55097e-33	8.0667e-31
FERMT1	2.4731	1.30632	5.02757e-30	3.52628e-28
RHCG	2.47239	1.30591	5.31442e-29	3.35722e-27
LCN2	2.46668	1.30257	1.62701e-11	1.61338e-10
TMEM158	2.45063	1.29315	4.2637e-26	2.01616e-24
AP001783.1	2.44784	1.29151	3.57935e-31	2.89427e-29
IL12RB2	2.44633	1.29062	9.32407e-39	1.83889e-36
SBSN	2.44117	1.28757	1.80072e-20	4.69265e-19
IGLV3.21	2.4407	1.2873	2.2484e-09	1.71446e-08
DSG3	2.44007	1.28692	8.10184e-14	1.04413e-12
BIRC5	2.43801	1.28571	9.38557e-38	1.61964e-35
SOSTDC1	2.4362	1.28464	3.06386e-18	6.28108e-17
IGHG3	2.43481	1.28381	3.38349e-10	2.86181e-09
LINC02613	2.43348	1.28302	4.21009e-29	2.6957e-27
MELK	2.42638	1.2788	1.29134e-40	3.23418e-38
KLK8	2.42246	1.27648	4.7885e-22	1.46825e-20
LEMD1	2.41989	1.27494	1.54383e-34	1.74768e-32
SHC4	2.41968	1.27482	4.20071e-24	1.60981e-22
U62317.1	2.41688	1.27314	1.86716e-26	9.21404e-25
IGLC2	2.40729	1.26741	4.45227e-10	3.70981e-09
FGFBP1	2.39792	1.26179	4.9488e-24	1.87995e-22
PLK1	2.38778	1.25567	7.97065e-44	2.83745e-41
LINC01315	2.38085	1.25147	2.11714e-36	2.9662e-34
ZIC1	2.38009	1.25101	4.88945e-28	2.83849e-26
UCHL1	2.37929	1.25053	2.45449e-22	7.78315e-21
HRASLS	2.37446	1.2476	2.24932e-23	8.00537e-22
DUSP9	2.36773	1.24351	2.00087e-35	2.54501e-33
KIF18B	2.36763	1.24345	1.61936e-48	1.29098e-45
IRX1	2.36401	1.24123	7.79259e-16	1.24142e-14
FABP5	2.36227	1.24017	2.92093e-31	2.38228e-29
CDCA5	2.36104	1.23942	4.39465e-46	2.24095e-43
ORM2	2.35986	1.2387	7.22769e-14	9.34663e-13
TFCP2L1	2.3597	1.2386	3.03652e-20	7.73507e-19
IGF2BP2	2.35583	1.23623	3.68599e-26	1.75176e-24
TPX2	2.34934	1.23225	3.90587e-40	9.28908e-38
SMOC1	2.34606	1.23024	1.15373e-17	2.24179e-16
PRKX	2.34562	1.22997	7.00735e-43	2.19133e-40
S100B	2.34443	1.22923	1.66089e-15	2.54754e-14
AP001505.1	2.34319	1.22847	6.67089e-44	2.43294e-41
ORC1	2.34111	1.22719	2.37461e-54	5.84381e-51
C6orf15	2.33916	1.22599	1.73921e-20	4.54702e-19
BTG3	2.33837	1.22551	3.17748e-46	1.63501e-43
FAM19A3	2.33323	1.22233	5.21875e-29	3.30416e-27
CCL18	2.33107	1.22099	4.34446e-15	6.40211e-14
HR	2.32376	1.21646	3.3348e-27	1.79256e-25
TRIP13	2.31129	1.2087	2.97758e-45	1.3376e-42
ATP6V1C2	2.3099	1.20783	8.31119e-35	9.82109e-33
COCH	2.30973	1.20772	1.92229e-27	1.05432e-25
KIFC1	2.30811	1.20671	2.53028e-43	8.57598e-41
CDT1	2.29976	1.20148	1.54906e-45	7.24627e-43
CDCA3	2.29912	1.20108	2.19507e-52	2.88942e-49
CAPN6	2.29851	1.2007	1.02986e-13	1.30994e-12
IGKC	2.29702	1.19976	1.74372e-08	1.19692e-07
CXCL13	2.29663	1.19952	6.04184e-10	4.95695e-09
RCOR2	2.29402	1.19788	8.80946e-27	4.52891e-25
CASC8	2.29291	1.19718	1.06108e-36	1.52822e-34
BOP1	2.292	1.19661	1.39174e-60	6.56458e-57
CTSV	2.28521	1.19233	1.73256e-32	1.59977e-30
PIMREG	2.28105	1.1897	5.9449e-44	2.18502e-41
CDC45	2.28022	1.18917	7.69298e-45	3.17838e-42
IGLC3	2.27685	1.18704	1.81486e-08	1.24274e-07
SEPT3	2.27681	1.18701	3.81968e-23	1.32395e-21
LGR6	2.27537	1.1861	9.33753e-20	2.25961e-18
GSDMC	2.27473	1.1857	5.33181e-26	2.49827e-24
LINC01819	2.27356	1.18495	1.44873e-22	4.70439e-21
AIF1L	2.27123	1.18348	1.8918e-24	7.54082e-23
SLPI	2.26794	1.18138	1.76931e-08	1.21331e-07
B3GNT5	2.26293	1.17819	9.18979e-35	1.0659e-32
LINC00393	2.26194	1.17756	4.37162e-27	2.32559e-25
AC024940.2	2.25834	1.17526	1.40192e-25	6.28279e-24
MYC	2.25804	1.17507	2.39414e-33	2.40272e-31
IGLV1.44	2.25752	1.17474	5.07723e-08	3.28548e-07
IL34	2.2547	1.17294	9.0046e-24	3.32254e-22
VIM.AS1	2.25303	1.17186	1.18877e-28	7.32177e-27
GSTP1	2.24949	1.1696	4.23475e-23	1.45711e-21
NDC80	2.24936	1.16951	2.12496e-43	7.24561e-41
LINC02487	2.24899	1.16928	3.73746e-27	2.00519e-25
OBP2B	2.24664	1.16777	9.08266e-10	7.28285e-09
MMP1	2.24216	1.16489	1.84809e-09	1.42515e-08
MAP3K21	2.24087	1.16406	4.61994e-41	1.19405e-38
RAD54L	2.2404	1.16376	1.29373e-46	7.54925e-44
CALB2	2.23996	1.16347	6.50032e-14	8.4543e-13
LINC00839	2.23894	1.16282	8.78333e-26	4.00931e-24
KRT14	2.23821	1.16235	6.1675e-07	3.44205e-06
RBM38	2.23757	1.16193	5.26501e-54	1.06432e-50
LY6K	2.2368	1.16143	4.90723e-20	1.22469e-18
RASD2	2.23599	1.16091	1.88715e-24	7.5276e-23
CEP55	2.22997	1.15703	1.13563e-37	1.92452e-35
TTK	2.22823	1.1559	2.6756e-39	5.67206e-37
RASAL1	2.22763	1.15551	8.93515e-26	4.07204e-24
IDO1	2.22622	1.15459	3.22719e-15	4.82094e-14
KIF1A	2.22613	1.15454	9.87254e-16	1.55138e-14
AC245884.9	2.22284	1.15241	8.34508e-27	4.30582e-25
NKX1.2	2.2196	1.1503	2.57116e-31	2.11223e-29
E2F2	2.21852	1.14959	2.88022e-46	1.5095e-43
S100A1	2.21779	1.14913	4.14972e-10	3.46997e-09
EXO1	2.21545	1.1476	2.28205e-39	4.85596e-37
PICSAR	2.21536	1.14754	1.08655e-23	3.98321e-22
KLHDC7B	2.21307	1.14605	4.44548e-14	5.86715e-13
ZNF883	2.21081	1.14458	2.47726e-28	1.48065e-26
GSTA1	2.2103	1.14424	9.29529e-13	1.0599e-11
IGLV3.25	2.20809	1.1428	3.2617e-07	1.89062e-06
ADGRG6	2.20171	1.13863	2.59684e-25	1.13591e-23
AFAP1.AS1	2.19876	1.13669	2.96269e-20	7.55378e-19
PFKP	2.19835	1.13642	3.82393e-25	1.64595e-23
EEF1DP5	2.19765	1.13596	3.68135e-26	1.75102e-24
CITED4	2.19609	1.13493	1.07343e-15	1.67795e-14
ASS1	2.1911	1.13165	1.04583e-17	2.03914e-16
IGKV4.1	2.19029	1.13112	4.42738e-07	2.5201e-06
AP001542.3	2.18613	1.12838	4.9326e-44	1.8248e-41
IGHM	2.1838	1.12684	2.90985e-07	1.69692e-06
HENMT1	2.18222	1.1258	1.58604e-38	3.04315e-36
IGHV1.18	2.18217	1.12576	1.06255e-06	5.7377e-06
RPL39L	2.18126	1.12516	1.53352e-36	2.17e-34
PPP1R1B	2.17512	1.12109	9.05349e-08	5.66927e-07
C1QL4	2.17383	1.12024	2.09664e-37	3.38102e-35
KRT86	2.17241	1.1193	2.36197e-20	6.11024e-19
DEPDC1	2.16961	1.11744	1.18468e-36	1.6976e-34
KIT	2.16455	1.11407	5.47954e-18	1.09866e-16
NT5DC2	2.1642	1.11383	1.11187e-47	7.96631e-45
STMN1	2.16175	1.1122	5.44283e-47	3.42306e-44
CXCL5	2.16153	1.11206	4.99214e-27	2.63096e-25
IQGAP3	2.15631	1.10856	3.62458e-34	4.007e-32
CDC25A	2.15416	1.10712	3.48894e-45	1.54282e-42
PRSS33	2.15245	1.10598	4.02388e-24	1.54728e-22
CHI3L2	2.15127	1.10519	1.37489e-10	1.22035e-09
SCRG1	2.15119	1.10514	1.61036e-22	5.19075e-21
SYNM	2.1496	1.10406	1.53221e-17	2.93887e-16
ZNF695	2.14874	1.10349	4.14364e-47	2.66521e-44
ABTB2	2.14698	1.10231	5.12766e-34	5.61384e-32
SKA1	2.14698	1.10231	1.16396e-37	1.96663e-35
FOXP4.AS1	2.14625	1.10182	3.26931e-38	5.96934e-36
SLC15A1	2.14607	1.1017	5.85528e-26	2.72774e-24
IGHV3.21	2.14383	1.10019	2.83912e-07	1.65824e-06
IGHV4.39	2.14296	1.09961	5.72326e-07	3.21059e-06
E2F1	2.13981	1.09748	1.86959e-38	3.49249e-36
TROAP	2.13509	1.0943	2.60536e-37	4.11923e-35
MUC15	2.13095	1.0915	6.49589e-14	8.45048e-13
CDCA2	2.12606	1.08818	6.81755e-34	7.36425e-32
SOX9.AS1	2.12308	1.08616	2.09325e-35	2.6271e-33
STAC	2.1225	1.08576	1.55788e-29	1.04354e-27
SLURP1	2.12056	1.08445	1.11986e-18	2.39646e-17
CPA4	2.12022	1.08422	8.66001e-21	2.33639e-19
CCNA2	2.11967	1.08384	1.06187e-35	1.39452e-33
IGLV1.47	2.11547	1.08098	3.40806e-07	1.9696e-06
SYT8	2.11532	1.08088	5.46605e-18	1.09635e-16
AP000851.2	2.11339	1.07956	8.746e-20	2.12464e-18
IGKV3.20	2.11165	1.07837	5.2565e-07	2.96343e-06
B3GNT3	2.11111	1.078	7.00797e-15	1.0119e-13
HJURP	2.11099	1.07792	8.49818e-38	1.47099e-35
IGLV6.57	2.10848	1.07621	2.37044e-07	1.40303e-06
ANP32E	2.10406	1.07317	1.40983e-35	1.8219e-33
CEBPB	2.10332	1.07267	5.1418e-45	2.18824e-42
NPM3	2.10068	1.07085	6.39186e-47	3.93252e-44
KLF5	2.09984	1.07028	2.28376e-18	4.74194e-17
LINC01842	2.09878	1.06955	1.75288e-29	1.16863e-27
LMO4	2.09855	1.06939	2.82696e-26	1.36412e-24
SH2D2A	2.09736	1.06857	1.05666e-33	1.11376e-31
DSCC1	2.09139	1.06446	7.02686e-44	2.53334e-41
C5orf66.AS1	2.09049	1.06384	3.39318e-23	1.18118e-21
MID1	2.0895	1.06316	5.50375e-30	3.83649e-28
LAPTM4B	2.08808	1.06218	3.53335e-28	2.07679e-26
PTTG1	2.08743	1.06173	3.13349e-37	4.85923e-35
MSI1	2.087	1.06143	5.91849e-18	1.18249e-16
CCNB2	2.08457	1.05975	8.29139e-34	8.8549e-32
TMCC2	2.08443	1.05965	1.59025e-30	1.1828e-28
VXN	2.08219	1.0581	9.03113e-26	4.11247e-24
BLACAT1	2.0816	1.0577	1.14341e-35	1.49274e-33
RECQL4	2.0806	1.057	6.84192e-38	1.20269e-35
MT1G	2.08031	1.0568	1.68623e-10	1.48159e-09
IGKV1.5	2.0803	1.05679	1.4009e-06	7.41756e-06
SMC1B	2.0796	1.05631	1.28504e-34	1.46645e-32
GABBR2	2.07774	1.05502	1.12846e-27	6.29294e-26
IGHV3.33	2.07562	1.05354	2.02281e-07	1.20788e-06
SIX3	2.07313	1.05181	9.51597e-17	1.67639e-15
IGKV3.11	2.0722	1.05116	7.45926e-07	4.1147e-06
TF	2.06959	1.04934	3.49895e-15	5.21452e-14
ANKS6	2.06679	1.04739	6.14248e-37	9.16832e-35
PLEKHG4B	2.06533	1.04637	5.07513e-22	1.55026e-20
KIF20A	2.06388	1.04536	3.94667e-31	3.16864e-29
IGLV3.1	2.06315	1.04485	2.10917e-06	1.08807e-05
PM20D2	2.06278	1.04459	4.76169e-21	1.32278e-19
TAF4B	2.06175	1.04387	3.03292e-37	4.74224e-35
HLA.DOB	2.0569	1.04047	5.23826e-23	1.78505e-21
MFGE8	2.05655	1.04023	4.02584e-23	1.392e-21
AKR1E2	2.05574	1.03966	5.59811e-29	3.52463e-27
YBX3	2.05561	1.03957	1.72332e-31	1.43657e-29
PRR11	2.05492	1.03908	2.75146e-26	1.33338e-24
MTHFD1L	2.05396	1.03841	1.81536e-37	2.96974e-35
CX3CL1	2.05279	1.03759	3.8467e-20	9.7148e-19
TICRR	2.05141	1.03662	6.3299e-43	1.99047e-40
GZMB	2.05136	1.03658	7.93191e-16	1.26326e-14
ORC6	2.0509	1.03626	1.84867e-39	3.97865e-37
ANLN	2.05012	1.03571	1.82572e-26	9.03314e-25
UBD	2.04933	1.03515	1.56141e-10	1.3764e-09
MND1	2.04688	1.03343	6.10718e-35	7.30821e-33
AURKA	2.04648	1.03314	5.83235e-35	6.99413e-33
NUF2	2.04639	1.03308	2.00954e-30	1.47528e-28
SLC43A3	2.04274	1.03051	2.55024e-42	7.32734e-40
FSCN1	2.03997	1.02855	1.18369e-27	6.59442e-26
LBP	2.0383	1.02737	4.08636e-08	2.67333e-07
AC016735.1	2.0383	1.02736	5.90496e-25	2.49614e-23
VTCN1	2.03811	1.02723	6.74441e-08	4.28166e-07
LRP8	2.03619	1.02587	3.72621e-38	6.73837e-36
AC008514.1	2.03529	1.02524	5.32764e-33	5.16362e-31
GPR19	2.03391	1.02426	6.23447e-47	3.87784e-44
LINC00511	2.03376	1.02415	3.99419e-31	3.20225e-29
SMO	2.03067	1.02195	6.73172e-27	3.51502e-25
B3GNT7	2.02938	1.02104	8.86457e-30	6.06714e-28
FBN3	2.0269	1.01927	2.65625e-30	1.92509e-28
NFIB	2.02511	1.018	4.47328e-20	1.11935e-18
AP001574.1	2.02359	1.01692	1.08356e-28	6.71022e-27
SLC6A11	2.01878	1.01348	1.31106e-24	5.32342e-23
LARGE2	2.01268	1.00912	4.44202e-19	9.97728e-18
AC099850.3	2.01247	1.00897	5.49457e-21	1.51932e-19
C5orf46	2.01035	1.00744	2.22792e-15	3.37811e-14
MYBL1	2.00956	1.00688	1.70271e-21	4.95765e-20
OXGR1	2.00938	1.00675	7.37322e-29	4.60639e-27
COL2A1	2.00374	1.00269	1.29719e-06	6.90785e-06
UBE2E3	2.00229	1.00165	4.1207e-31	3.28507e-29
AUNIP	2.00143	1.00103	1.01238e-43	3.55918e-41
EPHB6	1.99876	0.999104	4.16844e-23	1.43692e-21
RIPK4	1.99782	0.998427	2.07604e-26	1.01739e-24
RAD51AP1	1.99686	0.997732	1.45404e-35	1.87475e-33
TCAM1P	1.99594	0.997068	1.28307e-29	8.67676e-28
OTX1	1.99557	0.996798	1.00058e-30	7.63276e-29
PTK7	1.99552	0.996765	3.76258e-30	2.67886e-28
MDFI	1.99545	0.996711	4.46585e-14	5.89084e-13
CXCL10	1.99543	0.996699	2.72955e-11	2.64597e-10
FUT3	1.99533	0.996624	1.16814e-13	1.47686e-12
KIF14	1.99384	0.995553	2.34817e-30	1.71277e-28
GTSE1	1.99373	0.995467	8.71314e-35	1.01687e-32
NCAPG	1.99351	0.995309	6.01208e-33	5.78735e-31
SRSF12	1.99322	0.9951	8.4951e-40	1.9157e-37
AC009041.2	1.99128	0.993695	4.50222e-23	1.54539e-21
IGKV3.15	1.99059	0.993197	5.13275e-07	2.89713e-06
CYP39A1	1.98819	0.991458	3.57846e-22	1.11413e-20
GPC2	1.98731	0.990814	1.09583e-30	8.3034e-29
BCL2A1	1.98605	0.989903	1.0423e-17	2.03295e-16
AC006329.1	1.9852	0.989282	1.09004e-23	3.99343e-22
CCL7	1.98138	0.986506	7.09212e-21	1.93273e-19
IGHV3.23	1.9802	0.985648	6.53659e-06	3.13174e-05
CMTM7	1.98019	0.985639	3.267e-28	1.92623e-26
AC027031.2	1.98004	0.985527	2.4114e-29	1.5761e-27
SPC24	1.97527	0.982049	1.78731e-38	3.36097e-36
ASPM	1.97421	0.981275	9.26363e-28	5.21731e-26
OR7E38P	1.9727	0.980168	4.1164e-33	4.05917e-31
NCAPH	1.97135	0.979187	7.43631e-34	7.95671e-32
GLIPR2	1.97082	0.978794	1.21606e-28	7.48169e-27
PKMYT1	1.9701	0.978269	2.7462e-31	2.24301e-29
OR2I1P	1.96966	0.977949	2.96999e-11	2.86628e-10
IGLV3.19	1.9675	0.976362	9.81728e-06	4.58064e-05
EGFR	1.9669	0.975925	6.84987e-16	1.09648e-14
CENPF	1.96438	0.974075	1.24716e-26	6.30284e-25
ERICH5	1.96377	0.973626	2.76453e-28	1.64367e-26
ID4	1.96206	0.972372	5.95083e-12	6.20082e-11
AC109322.1	1.9617	0.972102	4.47764e-45	1.93468e-42
DLGAP5	1.96167	0.972084	1.02823e-29	7.00735e-28
YBX1	1.95962	0.970576	3.4729e-60	1.5121e-56
KRT83	1.95814	0.969481	1.42296e-25	6.36194e-24
GPT2	1.9567	0.968422	4.99034e-29	3.17018e-27
MKI67	1.9546	0.966871	3.13959e-24	1.22556e-22
NFE4	1.95437	0.966704	1.28441e-12	1.44075e-11
BAIAP2L2	1.95082	0.964079	7.23431e-29	4.5246e-27
PIF1	1.94983	0.963351	2.8965e-44	1.08575e-41
CHEK1	1.94935	0.962993	3.4132e-50	3.29667e-47
CTPS1	1.94806	0.962036	1.11952e-50	1.21859e-47
UBE2T	1.94416	0.959147	6.19299e-32	5.39285e-30
IGHV1.69D	1.94388	0.95894	5.56275e-06	2.6939e-05
ACTG2	1.94285	0.958177	1.71802e-08	1.18042e-07
RPL39P40	1.94062	0.956516	1.36807e-24	5.53507e-23
SAA1	1.93924	0.955493	4.91352e-07	2.7792e-06
FADS2	1.93773	0.954367	3.15441e-11	3.03598e-10
RFLNA	1.93743	0.954144	3.43658e-18	7.01722e-17
COL22A1	1.93676	0.953644	2.95249e-19	6.76587e-18
NCMAP	1.93577	0.95291	1.05558e-17	2.05672e-16
MTFR2	1.93467	0.952088	1.75148e-37	2.87355e-35
UNC13D	1.93457	0.952015	4.78751e-24	1.82357e-22
OLFM4	1.93354	0.951242	2.23205e-07	1.32625e-06
PRTFDC1	1.93344	0.951167	1.73965e-22	5.58524e-21
RAET1L	1.93291	0.950776	3.89588e-24	1.50317e-22
APBA2	1.93142	0.949662	7.72481e-27	4.0077e-25
SNORC	1.93006	0.948649	2.05569e-19	4.78831e-18
HMGA1	1.92628	0.945814	6.33894e-36	8.60424e-34
IGLV1.40	1.92331	0.943592	8.47872e-06	3.99162e-05
MCM2	1.92228	0.942821	4.3979e-40	1.03721e-37
CCKBR	1.92163	0.942333	6.36816e-24	2.38551e-22
SLC39A4	1.92152	0.942246	7.00962e-24	2.61887e-22
IGHV1.24	1.92136	0.942124	3.48899e-06	1.74163e-05
ORM1	1.92032	0.941348	1.67089e-07	1.00999e-06
PNMA3	1.91923	0.940524	4.31898e-31	3.42865e-29
NETO2	1.91872	0.940147	6.61562e-22	2.00459e-20
IGHG2	1.91772	0.939393	1.49618e-06	7.88371e-06
BUB1	1.91618	0.938235	2.72754e-28	1.6251e-26
RPP25	1.91574	0.937899	2.49509e-29	1.62704e-27
IL27RA	1.91569	0.937867	3.24626e-22	1.01517e-20
TYMS	1.91551	0.93773	2.85919e-30	2.0616e-28
TTLL4	1.91293	0.935783	2.9175e-38	5.3966e-36
GLDC	1.91097	0.934304	4.34491e-13	5.12997e-12
SMCO4	1.90907	0.932874	6.55557e-33	6.28913e-31
GABRE	1.90895	0.932777	1.80583e-18	3.78991e-17
TTC22	1.90583	0.930416	6.12462e-19	1.35841e-17
KCNK1	1.90553	0.930194	4.96106e-11	4.65991e-10
SKA3	1.90465	0.929523	1.9119e-30	1.41276e-28
CASP14	1.90404	0.929062	2.88311e-06	1.4577e-05
LTB	1.90386	0.928926	3.66331e-12	3.90933e-11
EFNA5	1.90369	0.928795	1.24349e-14	1.73917e-13
SRD5A1	1.90326	0.928471	5.50561e-31	4.34629e-29
NDUFB4P11	1.90265	0.928008	1.45175e-37	2.42396e-35
FAM3D	1.9019	0.927444	2.59441e-14	3.5229e-13
RUNX3	1.90141	0.92707	2.06375e-20	5.36328e-19
IGLV2.14	1.901	0.926757	2.86304e-05	0.000123781
GPR156	1.90094	0.926715	1.64461e-46	9.12628e-44
WFDC21P	1.89981	0.925853	3.8086e-14	5.07592e-13
C11orf86	1.8985	0.924856	1.67719e-25	7.42238e-24
BARX1	1.89756	0.924143	5.04204e-16	8.22212e-15
PLEKHF1	1.89707	0.923776	1.15821e-24	4.73679e-23
VSTM5	1.89575	0.922768	3.51006e-35	4.30035e-33
CDC6	1.89569	0.922722	5.03885e-23	1.7202e-21
KIF4A	1.8947	0.92197	7.16583e-26	3.30562e-24
AADAT	1.89334	0.920936	4.65561e-23	1.59514e-21
ENHO	1.89145	0.919494	1.83596e-11	1.81107e-10
TONSL	1.89139	0.91945	1.34047e-37	2.25144e-35
SPIB	1.8906	0.918846	3.65737e-15	5.4363e-14
MAP7D2	1.88954	0.918038	7.11464e-24	2.6546e-22
NKX2.5	1.88823	0.917033	5.1534e-18	1.03731e-16
OCA2	1.88796	0.916825	6.4113e-28	3.66042e-26
GINS1	1.88667	0.915838	1.02798e-36	1.48433e-34
IGHV4.34	1.88473	0.91436	1.53724e-06	8.09102e-06
AC121757.1	1.88457	0.914237	7.01189e-29	4.39035e-27
CHRM1	1.88428	0.914013	7.01203e-15	1.01223e-13
CLCN4	1.88427	0.914009	2.32213e-26	1.1321e-24
TMEM52	1.8836	0.913494	6.08651e-27	3.1899e-25
BPI	1.88304	0.91306	1.32119e-26	6.64137e-25
TLX1	1.88223	0.91244	3.31859e-16	5.51171e-15
SNHG6	1.88209	0.912334	3.40835e-31	2.76785e-29
NFIL3	1.88197	0.912244	9.90408e-28	5.56142e-26
PITX1	1.88158	0.911946	4.89652e-12	5.14389e-11
NDRG1	1.88137	0.911784	1.7991e-18	3.77998e-17
IGHV5.51	1.87936	0.910245	2.71022e-05	0.000117601
GINS4	1.87892	0.909906	3.92106e-28	2.29989e-26
SMOX	1.87891	0.909896	3.11607e-28	1.84108e-26
MPP6	1.87712	0.908524	1.54829e-34	1.74923e-32
SLC5A6	1.8767	0.908196	8.98742e-31	6.92117e-29
AC124248.1	1.87543	0.907222	9.30167e-25	3.85145e-23
PSRC1	1.87543	0.907222	4.0052e-43	1.31804e-40
DLX5	1.87472	0.906671	2.64497e-16	4.43718e-15
IGLV1.51	1.87413	0.906221	4.36929e-06	2.14716e-05
TMEM38A	1.8739	0.906045	1.64795e-28	9.98688e-27
LYNX1	1.87381	0.905972	4.5039e-16	7.37857e-15
IL4I1	1.87332	0.905596	5.24941e-19	1.17071e-17
FOSL1	1.87321	0.905513	2.69277e-18	5.54443e-17
NFE2L3	1.87308	0.905414	2.79451e-26	1.35077e-24
ADAMDEC1	1.87194	0.904532	1.22357e-11	1.23232e-10
AQP9	1.87041	0.903358	7.09874e-17	1.26472e-15
SMIM25	1.86989	0.902955	3.69009e-25	1.59076e-23
CHST3	1.86948	0.902637	2.41806e-22	7.6719e-21
COL11A2	1.86644	0.900288	1.30718e-21	3.85559e-20
MCM7	1.86631	0.900186	1.34839e-48	1.09031e-45
LINC01006	1.86594	0.899901	2.51855e-26	1.22575e-24
L3MBTL4	1.86574	0.89975	4.15551e-28	2.43237e-26
IGHV3.11	1.86566	0.899682	1.58635e-05	7.15578e-05
OSR1	1.86543	0.899506	2.98659e-14	4.02014e-13
DGAT2	1.8646	0.898868	1.13112e-16	1.97763e-15
PGBD5	1.86451	0.898793	2.55897e-18	5.27661e-17
MCM4	1.86429	0.898628	3.30425e-34	3.68163e-32
SLCO4A1.AS1	1.86381	0.898256	3.61328e-27	1.9404e-25
S100A7	1.86372	0.898186	0.00207966	0.00639966
MIR4653	1.86244	0.897194	2.94218e-16	4.91393e-15
SKP2	1.86233	0.897112	1.65289e-36	2.3331e-34
PRSS12	1.86138	0.896375	8.74861e-19	1.89946e-17
ECE2	1.86011	0.895387	5.45081e-46	2.70637e-43
CSRP2	1.85913	0.894626	2.70898e-24	1.06172e-22
DNMT3B	1.859	0.894524	4.02086e-32	3.56164e-30
IGLV2.23	1.85575	0.892002	2.18236e-05	9.61966e-05
UBE2S	1.8557	0.891962	8.80091e-31	6.78677e-29
GBP1	1.85508	0.891482	1.69003e-15	2.59028e-14
AL031058.1	1.8546	0.891104	8.78085e-27	4.5206e-25
C1QL2	1.85212	0.889176	7.76518e-24	2.87835e-22
CEACAM19	1.85088	0.888212	9.60589e-31	7.35741e-29
MPZL2	1.84909	0.886812	3.38203e-22	1.05529e-20
CIB2	1.84839	0.886266	1.27004e-22	4.14811e-21
MELTF.AS1	1.84677	0.885006	2.56983e-27	1.39327e-25
MESP1	1.84667	0.884924	1.3979e-15	2.16304e-14
IGHV1.2	1.84593	0.884349	5.20778e-05	0.000215539
FUOM	1.84485	0.883501	3.79627e-30	2.69946e-28
SLC16A1	1.84483	0.883486	1.69635e-17	3.23944e-16
IGLL5	1.84398	0.882821	1.88372e-06	9.79356e-06
IGHV4.59	1.84358	0.882508	2.75507e-05	0.000119432
CRHR1	1.84226	0.881479	8.12045e-19	1.77396e-17
ST8SIA1	1.84018	0.879845	1.76705e-33	1.80214e-31
TOP2A	1.83745	0.877702	4.68231e-17	8.53828e-16
NMB	1.83643	0.876905	2.1047e-24	8.35416e-23
IGHGP	1.8359	0.876489	8.33365e-07	4.56942e-06
CLDN6	1.83583	0.876432	9.48006e-15	1.34517e-13
CDC7	1.83308	0.874267	2.30878e-31	1.90776e-29
SNHG3	1.83251	0.873818	1.24127e-34	1.42512e-32
PDSS1	1.83205	0.873458	6.11902e-53	9.11444e-50
CCL13	1.83056	0.872285	1.76449e-13	2.18018e-12
RBP1	1.82964	0.871557	1.25357e-10	1.11824e-09
RSPO4	1.82954	0.871478	4.44614e-22	1.3722e-20
LINC01671	1.82836	0.870549	2.4072e-19	5.55904e-18
NEK2	1.82766	0.869997	1.15908e-23	4.23814e-22
AL049555.1	1.8273	0.869711	8.7789e-12	8.9791e-11
PPP1R14BP3	1.8263	0.868921	1.0795e-33	1.13362e-31
IGHV3.48	1.82492	0.867837	5.70137e-06	2.7549e-05
ODC1	1.82441	0.867428	1.167e-26	5.92418e-25
PPP1R14B	1.82431	0.867353	1.39925e-38	2.72166e-36
IGLV2.11	1.82385	0.866987	2.23261e-05	9.82434e-05
KIF18A	1.8236	0.866792	9.83054e-32	8.39258e-30
ITM2C	1.82139	0.865041	7.86871e-20	1.92142e-18
AL136366.1	1.82051	0.86434	1.14289e-26	5.81742e-25
AL109761.1	1.82018	0.864082	9.33816e-25	3.86373e-23
SNHG1	1.81964	0.86365	3.3008e-40	7.8832e-38
CRISPLD1	1.81932	0.863402	3.93622e-09	2.91659e-08
KIF15	1.81887	0.863041	2.74814e-29	1.78588e-27
FBXO17	1.8163	0.860999	1.07969e-23	3.96322e-22
AC019171.1	1.81604	0.860796	1.03391e-27	5.7942e-26
PIM1	1.81594	0.86072	1.62581e-25	7.21758e-24
PLA2G7	1.81519	0.860117	8.97483e-17	1.585e-15
CNIH2	1.81347	0.85875	1.55848e-19	3.68014e-18
SLC6A15	1.81315	0.858498	2.77132e-21	7.86277e-20
POU5F1	1.81292	0.858316	2.49134e-42	7.19463e-40
CFAP58.DT	1.81215	0.857702	1.62382e-25	7.21438e-24
LY6E	1.81171	0.85735	3.68717e-17	6.78924e-16
IGLV4.69	1.81006	0.856038	3.35798e-05	0.000143426
ARHGEF4	1.80969	0.855742	1.04552e-31	8.88567e-30
IL32	1.80797	0.854374	3.86374e-16	6.37596e-15
SGO1	1.80706	0.853643	3.35203e-29	2.16836e-27
EDN2	1.80562	0.852495	6.48191e-12	6.7282e-11
ETV4	1.80557	0.852451	1.15861e-12	1.30507e-11
OLFM2	1.8051	0.852079	2.14439e-14	2.93039e-13
AC141557.1	1.80279	0.850234	3.74864e-22	1.16455e-20
LRFN4	1.80243	0.849942	5.8594e-22	1.78117e-20
CBR1	1.80096	0.848768	7.515e-23	2.50952e-21
EPHB3	1.80094	0.848751	2.3363e-18	4.84216e-17
ACTR3B	1.80033	0.848261	2.76579e-37	4.36071e-35
CHST2	1.80032	0.848256	2.19775e-24	8.68088e-23
STIL	1.79972	0.847775	2.70721e-31	2.21436e-29
GDF5	1.79969	0.847746	4.24292e-24	1.62339e-22
CXADR	1.79948	0.847583	4.69754e-14	6.18494e-13
TRPV6	1.79946	0.847564	2.13884e-13	2.62268e-12
GJB5	1.79874	0.846986	1.6045e-11	1.59301e-10
GPR161	1.79759	0.846067	3.86083e-26	1.83178e-24
AC092718.4	1.79735	0.845874	4.40142e-30	3.10635e-28
YBX1P10	1.79536	0.844277	1.25631e-43	4.33594e-41
CDC25B	1.79396	0.843149	3.52747e-26	1.68349e-24
HACD1	1.79361	0.842865	4.41233e-20	1.10507e-18
ESPL1	1.79316	0.842503	2.02541e-28	1.2183e-26
ANXA8	1.79309	0.842445	4.73768e-18	9.54994e-17
VAX2	1.79257	0.84203	2.9991e-15	4.48879e-14
PSORS1C2	1.79236	0.841858	1.49231e-17	2.86429e-16
IGLV9.49	1.79218	0.841717	9.8664e-07	5.35127e-06
RCAN1	1.79213	0.841672	2.7594e-20	7.08012e-19
MT1X	1.7921	0.841649	6.10282e-17	1.09838e-15
CNTFR	1.79164	0.841279	2.19949e-09	1.67942e-08
RASGEF1C	1.79028	0.840186	3.07319e-31	2.50286e-29
TOP1MT	1.79013	0.840064	1.15836e-40	2.91403e-38
CXCL8	1.78811	0.838438	3.4879e-11	3.33709e-10
TMEM139	1.78712	0.837633	2.99132e-09	2.24525e-08
EZH2	1.7866	0.837219	1.64803e-33	1.68988e-31
IGHV4.31	1.78624	0.836925	7.61652e-06	3.61246e-05
KHDRBS3	1.78615	0.83685	4.73151e-23	1.61918e-21
ZNF462	1.78594	0.836681	3.84136e-20	9.70664e-19
OR7E22P	1.78583	0.836596	3.04835e-14	4.10132e-13
CDCA7L	1.78441	0.835444	3.83161e-20	9.68632e-19
SNORD99	1.78413	0.835223	2.7775e-21	7.87605e-20
BLM	1.78383	0.834975	2.49935e-33	2.50386e-31
FANCA	1.78284	0.834176	1.68807e-33	1.72782e-31
CKS1B	1.78256	0.833948	2.3108e-40	5.58956e-38
CPAMD8	1.78164	0.833207	2.87687e-17	5.35823e-16
WIF1	1.78155	0.833135	3.04842e-09	2.28599e-08
NCOA7	1.7813	0.832934	1.54427e-20	4.0542e-19
IL1RL2	1.77947	0.83145	8.05422e-26	3.68541e-24
IGHV3.73	1.7789	0.830984	1.71502e-05	7.69694e-05
DIRAS1	1.77729	0.82968	2.54338e-12	2.76581e-11
AC092916.1	1.77659	0.829108	3.74471e-19	8.47154e-18
AC112907.2	1.77552	0.82824	4.58393e-21	1.27624e-19
SINHCAF	1.7752	0.827978	2.32909e-21	6.68793e-20
CHRNA5	1.77509	0.827889	2.67255e-23	9.43092e-22
TBX19	1.77494	0.827767	9.09266e-37	1.32645e-34
GPX7	1.77475	0.827616	2.1349e-22	6.8271e-21
IGHJ3	1.77327	0.826409	1.57342e-05	7.10253e-05
KIF23	1.77305	0.826235	8.5132e-27	4.38856e-25
PCAT6	1.77204	0.825413	3.98277e-24	1.53356e-22
TMPRSS13	1.77132	0.824826	3.76664e-18	7.65253e-17
TUBB6	1.77091	0.824492	1.98117e-26	9.74266e-25
SPTBN2	1.76807	0.822173	1.03653e-15	1.6243e-14
SFT2D2	1.76763	0.821817	1.05171e-32	9.82324e-31
MCRIP2P1	1.76722	0.821482	8.00859e-27	4.14353e-25
PDE7A	1.76676	0.821108	1.56484e-35	2.00846e-33
TEAD4	1.76516	0.819798	2.37674e-33	2.38948e-31
NPM2	1.76487	0.819561	2.85875e-29	1.85563e-27
GAPDHP1	1.7642	0.819018	8.50541e-09	6.03741e-08
PTCHD1	1.76373	0.818632	2.72294e-25	1.18831e-23
LINC01143	1.76364	0.818556	9.40421e-26	4.2652e-24
SYCE1L	1.76123	0.816583	3.24675e-23	1.1344e-21
APOBEC3B	1.76106	0.816441	2.8285e-11	2.7358e-10
CDK1	1.76036	0.81587	3.06347e-23	1.07301e-21
LINC00885	1.76003	0.815601	1.08232e-18	2.32051e-17
GPM6B	1.76001	0.815584	5.00072e-18	1.00694e-16
HOMER3	1.75986	0.815457	1.34644e-28	8.24796e-27
TINAGL1	1.75981	0.815419	3.67641e-16	6.07924e-15
SLC52A2	1.75938	0.81507	2.84454e-35	3.52312e-33
GJB6	1.75839	0.814257	1.52756e-16	2.62726e-15
LINP1	1.75822	0.814117	4.36743e-17	7.97693e-16
TNFRSF21	1.75775	0.813733	3.86097e-18	7.83574e-17
DSG1	1.75762	0.813627	9.69421e-12	9.86182e-11
RHEX	1.75615	0.812416	1.91676e-12	2.11486e-11
LPAR3	1.75578	0.812115	1.65596e-12	1.83822e-11
COL27A1	1.75574	0.812082	2.41296e-18	4.99555e-17
SLC6A9	1.75484	0.811339	1.46824e-20	3.86356e-19
CCL20	1.75433	0.810924	7.73812e-16	1.23344e-14
APCDD1L	1.75314	0.809945	2.30834e-13	2.81709e-12
AL590617.2	1.75307	0.809887	6.95836e-34	7.50204e-32
SCML2	1.75275	0.809617	1.06174e-22	3.48993e-21
DNER	1.75229	0.809239	8.80103e-15	1.25385e-13
RAD51	1.7516	0.808673	7.75564e-30	5.34695e-28
AC015712.4	1.75136	0.808474	1.83337e-29	1.21656e-27
UCK2	1.7496	0.807029	2.17475e-49	1.92336e-46
PRRX2	1.74952	0.806957	1.65804e-18	3.49138e-17
NXPH4	1.74943	0.806882	7.56416e-10	6.11987e-09
MICALL1	1.74906	0.80658	3.29515e-33	3.27789e-31
CSN3	1.74676	0.804679	6.57174e-08	4.17901e-07
VSNL1	1.74583	0.803915	2.08263e-14	2.85012e-13
IGHV3.15	1.74572	0.803821	9.00906e-05	0.000357645
EPHX4	1.74569	0.803794	4.071e-15	6.01166e-14
ASF1B	1.74563	0.803744	1.87076e-26	9.22374e-25
AL138724.1	1.74434	0.802682	2.03819e-45	9.37931e-43
ULBP3	1.74367	0.802129	3.26728e-22	1.02117e-20
ALKAL2	1.74331	0.80183	9.61409e-18	1.88231e-16
VASH2	1.74217	0.800888	1.79023e-19	4.19415e-18
BMP7	1.74178	0.800564	1.05983e-10	9.54164e-10
LAG3	1.74124	0.800114	1.68156e-15	2.578e-14
SLC38A3	1.74088	0.79982	2.85516e-13	3.43993e-12
GBP1P1	1.74078	0.799734	7.88904e-14	1.01763e-12
SCX	1.74046	0.799466	3.8206e-19	8.63289e-18
XK	1.73894	0.798209	2.70704e-23	9.54072e-22
AC069148.1	1.73869	0.798001	2.38956e-32	2.18504e-30
IGHV3.30	1.7383	0.797679	0.000101549	0.000399992
E2F3	1.73818	0.797578	1.3341e-32	1.23791e-30
PRRT3.AS1	1.73801	0.797436	4.42649e-19	9.94634e-18
RF02272	1.73718	0.796746	3.55426e-20	8.99723e-19
RFC4	1.73706	0.796646	2.69349e-43	9.02113e-41
MRPL12	1.73681	0.796439	7.55733e-22	2.2826e-20
FAM84A	1.7358	0.7956	2.91647e-15	4.37062e-14
TNNI2	1.73544	0.795301	6.25405e-16	1.0068e-14
DEPDC1B	1.73526	0.79515	1.52161e-26	7.61504e-25
GBP5	1.73482	0.794784	3.09802e-10	2.63137e-09
PCP4L1	1.73466	0.794656	1.41973e-10	1.25719e-09
FANCE	1.73452	0.79454	5.69068e-36	7.74289e-34
SNHG4	1.73394	0.794053	9.66806e-28	5.43428e-26
L1CAM	1.73394	0.794053	8.70909e-12	8.91091e-11
IGKV1.27	1.73387	0.793999	4.09976e-05	0.000172634
ARNTL2	1.73349	0.793682	2.66694e-16	4.47007e-15
NXN	1.73344	0.793638	1.01097e-19	2.43709e-18
CCL8	1.73342	0.793621	1.56967e-11	1.56117e-10
GPR12	1.73265	0.792984	3.56968e-23	1.23957e-21
RAB7B	1.73237	0.792746	1.12475e-18	2.40601e-17
IL2RA	1.732	0.792435	3.92685e-17	7.20012e-16
NCS1	1.7318	0.792275	1.65076e-26	8.23952e-25
CD79A	1.73132	0.791869	7.04809e-07	3.90234e-06
MED30	1.73119	0.791766	8.50274e-45	3.48161e-42
HASPIN	1.73114	0.791718	1.18889e-33	1.24157e-31
FAM131C	1.73015	0.7909	2.10077e-29	1.38587e-27
CXCL11	1.72956	0.790401	2.64836e-08	1.77463e-07
AP001207.3	1.72931	0.790197	2.22229e-15	3.37047e-14
E2F8	1.72904	0.789971	1.30898e-20	3.47192e-19
C1orf116	1.72834	0.78939	2.40987e-08	1.62501e-07
MT1H	1.72685	0.788141	1.63434e-21	4.76348e-20
ANXA8L1	1.72573	0.787205	1.61133e-20	4.22047e-19
XAGE2	1.72547	0.78699	8.2966e-12	8.50733e-11
CHRDL2	1.72479	0.786424	4.14158e-14	5.48355e-13
MATN4	1.72441	0.786103	3.92806e-27	2.09949e-25
MIR7111	1.72387	0.785652	6.06592e-20	1.49932e-18
IGHV1.46	1.72208	0.784148	6.90991e-05	0.000280148
RF02246	1.72164	0.783783	6.05313e-11	5.62685e-10
SPHK1	1.72134	0.78353	4.7728e-19	1.06863e-17
LOXL4	1.72107	0.783308	1.88335e-13	2.32045e-12
ULBP1	1.71979	0.782231	1.22902e-19	2.93772e-18
FBL	1.71919	0.781731	1.76551e-38	3.33104e-36
LINC01235	1.71886	0.781454	1.806e-13	2.22952e-12
TGM1	1.71807	0.780792	1.74631e-28	1.05603e-26
HRK	1.71785	0.780607	5.1807e-26	2.42948e-24
NCAPD2	1.7176	0.780398	6.9911e-32	6.05988e-30
NOP2	1.71621	0.779227	1.61276e-46	9.03817e-44
AC092903.1	1.71573	0.778823	1.53037e-31	1.28329e-29
EIF4EBP1	1.71523	0.778402	5.41246e-17	9.79712e-16
IFRD1	1.71436	0.777669	3.55137e-32	3.17058e-30
VANGL2	1.71435	0.777658	7.52589e-09	5.36769e-08
CENPE	1.71227	0.775912	5.10866e-23	1.74298e-21
CECR7	1.71169	0.775422	9.28069e-16	1.46365e-14
AL157373.2	1.71103	0.774869	5.06019e-40	1.18354e-37
PLIN2	1.71065	0.774543	4.70994e-22	1.4473e-20
MOB3B	1.71017	0.774144	8.05663e-20	1.96392e-18
CENPN	1.70992	0.773929	1.6769e-30	1.24236e-28
ALYREF	1.70946	0.773537	1.5458e-37	2.5734e-35
SIM2	1.70925	0.773361	9.06747e-14	1.16275e-12
MT1L	1.70878	0.772964	9.88665e-12	1.0054e-10
SULT4A1	1.70872	0.772917	3.61338e-16	5.9855e-15
LGALS7B	1.70831	0.772566	1.1289e-12	1.27312e-11
NCK2	1.70749	0.771875	1.0471e-40	2.6459e-38
CNGA1	1.70646	0.771009	1.06875e-22	3.51094e-21
CHRM3	1.70586	0.770497	1.87027e-19	4.36952e-18
ENO1	1.70575	0.770405	5.64767e-35	6.80148e-33
IGHV4.28	1.7046	0.769436	8.04142e-07	4.4186e-06
IGKV2D.29	1.70394	0.768878	2.38275e-05	0.000104299
CLSPN	1.70391	0.768848	1.78992e-20	4.66881e-19
MET	1.70328	0.768317	1.33352e-11	1.33546e-10
FAT1	1.70304	0.768109	9.62839e-13	1.09567e-11
SUV39H2	1.70293	0.768018	5.52256e-40	1.2811e-37
AL356417.2	1.70273	0.767846	1.73122e-17	3.30267e-16
NIPAL1	1.7026	0.76774	2.03354e-21	5.87558e-20
LINC00092	1.70243	0.767594	1.31001e-27	7.26954e-26
SAPCD2	1.70217	0.767374	7.47442e-20	1.83146e-18
ATAD2	1.70074	0.766159	9.31615e-21	2.49911e-19
LINC01152	1.69947	0.765086	6.26996e-18	1.25094e-16
TNF	1.69941	0.765031	1.12609e-14	1.5824e-13
IGHJ3P	1.69922	0.764876	2.49726e-06	1.274e-05
PRSS3	1.69902	0.764702	1.19067e-24	4.8625e-23
CGREF1	1.699	0.764683	1.24599e-13	1.57038e-12
MTBP	1.69828	0.764076	3.38122e-37	5.17254e-35
LINC00707	1.69796	0.763803	1.59863e-16	2.74365e-15
ADM	1.69507	0.761346	3.40796e-12	3.64852e-11
MUC16	1.69493	0.761228	3.25487e-12	3.49388e-11
LINC01198	1.69328	0.759821	8.1701e-27	4.21938e-25
LMNB2	1.69257	0.759219	1.63918e-38	3.11345e-36
PFDN2	1.69186	0.758613	6.15136e-33	5.91136e-31
AP002360.1	1.6915	0.758303	9.95851e-24	3.66735e-22
BCL2L12	1.69147	0.758274	1.07851e-34	1.24329e-32
PNPLA3	1.69146	0.758266	3.74611e-15	5.56382e-14
TMEM213	1.69041	0.757373	5.45682e-15	7.9687e-14
KLK14	1.69003	0.757051	3.75884e-08	2.47249e-07
SLC2A6	1.68939	0.756505	1.20634e-20	3.2057e-19
BUB1B	1.68905	0.756213	1.63593e-20	4.28293e-19
AC023043.1	1.68897	0.756146	9.69125e-22	2.90081e-20
AC012073.1	1.68885	0.756042	4.44066e-35	5.38223e-33
COTL1	1.6884	0.755657	4.69558e-21	1.30604e-19
POLR3G	1.68735	0.754758	2.94719e-36	4.09869e-34
TK1	1.68668	0.754186	5.88861e-20	1.45804e-18
AGO2	1.68618	0.753762	7.63853e-28	4.32789e-26
MRAS	1.68617	0.753749	7.88117e-20	1.92363e-18
DUSP2	1.68598	0.753585	2.9418e-20	7.5073e-19
PRC1	1.68494	0.752696	4.60413e-20	1.15107e-18
DDX39A	1.68488	0.752646	7.91904e-42	2.18651e-39
TGM5	1.68426	0.752117	1.86334e-16	3.16724e-15
SPOCK2	1.68409	0.751968	1.02173e-12	1.15849e-11
TACC3	1.68374	0.75167	1.46133e-28	8.93241e-27
IL22RA2	1.68365	0.751588	1.85273e-24	7.40071e-23
LIMD2	1.68218	0.750329	5.2718e-19	1.17478e-17
GCNT2	1.68197	0.750154	1.66475e-13	2.06414e-12
ARHGEF39	1.6811	0.749409	1.75575e-39	3.79309e-37
TUBB4A	1.67925	0.747819	2.17847e-14	2.97481e-13
RSU1	1.67923	0.747802	1.5315e-30	1.14061e-28
CDKN3	1.67863	0.747281	1.01584e-22	3.34684e-21
CYP27C1	1.6786	0.747258	1.32755e-22	4.32596e-21
NASP	1.67813	0.746851	3.14717e-46	1.63428e-43
MAP2	1.67807	0.746806	9.39283e-16	1.47969e-14
SH2B2	1.67726	0.746107	1.16293e-30	8.77655e-29
DDIT4	1.67649	0.745446	2.54846e-14	3.46417e-13
TFAP2C	1.67634	0.745316	9.46224e-16	1.49021e-14
TEAD2	1.67622	0.745213	1.15122e-15	1.79162e-14
RRP1	1.67568	0.744751	2.38227e-38	4.42102e-36
PVR	1.67493	0.744103	2.28612e-27	1.24542e-25
LINC01508	1.67424	0.74351	3.04203e-26	1.46416e-24
ELFN1.AS1	1.67357	0.74293	3.15893e-11	3.03981e-10
AC093627.4	1.67347	0.74284	6.54181e-26	3.02516e-24
RRS1	1.67246	0.741973	1.69293e-29	1.13266e-27
CENPV	1.67245	0.741965	6.39638e-13	7.4373e-12
SMAGP	1.67129	0.740964	1.26548e-26	6.38969e-25
AC009902.2	1.67124	0.740918	1.28144e-30	9.61964e-29
DNPH1	1.67124	0.740916	9.99675e-23	3.29741e-21
ESYT3	1.67077	0.740515	4.12206e-38	7.38344e-36
CD7	1.67068	0.740437	1.53495e-13	1.91284e-12
PDE9A	1.67033	0.740131	1.41906e-15	2.19278e-14
PDCD5	1.6701	0.739938	2.56881e-46	1.35888e-43
MPZ	1.6694	0.739326	3.2757e-13	3.92405e-12
AL139289.2	1.66935	0.739291	2.3737e-24	9.33678e-23
ANKLE1	1.66909	0.739061	9.63892e-36	1.27362e-33
AMER1	1.6681	0.738203	8.6192e-34	9.15317e-32
AC006946.2	1.66792	0.738052	2.08033e-23	7.41504e-22
SAA2.SAA4	1.66772	0.737877	5.54924e-08	3.57295e-07
MRPL15	1.66755	0.737727	9.03782e-39	1.78867e-36
C2orf70	1.66722	0.737443	1.08597e-19	2.60901e-18
RYR1	1.66708	0.737327	2.78076e-21	7.8777e-20
IGHV3.20	1.66706	0.737304	3.08785e-06	1.55331e-05
AL442663.4	1.66496	0.73549	5.30495e-28	3.06399e-26
POMC	1.66483	0.735374	4.92885e-20	1.229e-18
S100A10	1.66482	0.735364	1.06737e-16	1.87102e-15
DEK	1.66377	0.734458	7.15603e-28	4.06265e-26
LMNB1	1.66317	0.733938	5.93794e-23	2.00656e-21
DLX6	1.66309	0.733862	2.92789e-21	8.28207e-20
KCNS1	1.66233	0.733203	5.07465e-24	1.92388e-22
EPHB1	1.66147	0.732463	1.47073e-19	3.49041e-18
LZTS3	1.66146	0.732449	8.65519e-14	1.1119e-12
MAPK4	1.66134	0.732343	8.2437e-13	9.45703e-12
CDC42EP1	1.66097	0.732025	4.19561e-20	1.05453e-18
RCC1	1.66085	0.73192	8.90156e-42	2.44585e-39
CDK6	1.66072	0.731812	4.22439e-13	4.99392e-12
ATAD3A	1.66041	0.731544	3.36725e-30	2.40952e-28
EPHX3	1.66039	0.731523	9.38615e-16	1.47946e-14
SNHG12	1.65933	0.730605	3.61858e-30	2.57959e-28
SPAG5	1.65909	0.730391	3.59457e-19	8.14491e-18
AP000251.1	1.65807	0.729509	5.66865e-21	1.56516e-19
AC087289.1	1.65777	0.729245	1.06732e-20	2.84964e-19
CDH19	1.65645	0.728091	6.26667e-15	9.09269e-14
MAD2L1	1.65608	0.727769	5.19502e-24	1.96425e-22
CD82	1.65604	0.727736	8.01604e-16	1.27558e-14
CKAP2L	1.65556	0.727322	9.83297e-20	2.37443e-18
AC138904.1	1.65531	0.727104	2.74393e-23	9.66472e-22
ADORA1	1.65501	0.726839	6.83789e-10	5.5593e-09
POP1	1.65444	0.726341	1.13655e-35	1.48915e-33
SAA2	1.65345	0.725477	3.53494e-07	2.03835e-06
DHCR7	1.65256	0.724704	4.05025e-19	9.13719e-18
RASSF4	1.65203	0.724242	1.07017e-20	2.8559e-19
CD164L2	1.65202	0.724229	1.12708e-20	3.00353e-19
RGS2	1.65166	0.72392	7.23438e-11	6.65332e-10
TSPAN33	1.65008	0.722533	5.91839e-20	1.46413e-18
KRT87P	1.64994	0.722415	3.42601e-15	5.10985e-14
IGLV4.60	1.64983	0.722321	5.26063e-05	0.00021763
FAM207A	1.64902	0.721606	1.99083e-27	1.09085e-25
FIRRE	1.64896	0.721558	5.30913e-20	1.31975e-18
MAML2	1.64868	0.721308	2.98765e-16	4.98546e-15
CKS2	1.64828	0.720961	7.1886e-24	2.6769e-22
PBK	1.64776	0.720507	1.66124e-15	2.54754e-14
RMI2	1.64606	0.719013	5.76716e-22	1.75596e-20
IGLV3.9	1.646	0.718965	9.09351e-05	0.000360745
IGKV3D.20	1.64581	0.718794	2.2462e-05	9.8779e-05
JPH1	1.64489	0.717995	2.85456e-14	3.85158e-13
RPS2P32	1.64313	0.71645	4.01939e-31	3.2179e-29
H2AFX	1.6429	0.716241	7.81048e-26	3.57967e-24
MYBPC1	1.64252	0.71591	6.02833e-06	2.90322e-05
AMD1	1.64207	0.715518	1.27333e-28	7.81703e-27
SLC2A12	1.64174	0.715228	3.74222e-17	6.87941e-16
IGHV1.69	1.64117	0.714721	0.000248042	0.000915393
PABPC1	1.64056	0.714189	1.78141e-28	1.07496e-26
TCF19	1.64049	0.714126	1.97847e-24	7.86965e-23
FZD7	1.64009	0.713778	3.86371e-14	5.14453e-13
NTN1	1.64004	0.713727	2.96915e-12	3.19992e-11
WNT10A	1.64	0.713699	5.60901e-19	1.24845e-17
TEDC2	1.63973	0.713458	1.68062e-25	7.43177e-24
AC100812.1	1.6396	0.713341	2.26082e-40	5.49214e-38
RNF182	1.63943	0.713195	1.40386e-15	2.17166e-14
NRBP2	1.63941	0.713173	2.7783e-23	9.77969e-22
IRAK1	1.6394	0.713167	7.22023e-31	5.61373e-29
PTDSS1	1.63935	0.713125	2.3866e-35	2.97747e-33
MAPK15	1.63916	0.712954	6.14484e-08	3.92738e-07
ARL4C	1.6389	0.712731	8.31019e-17	1.47314e-15
C9orf40	1.63853	0.712403	8.34016e-31	6.45786e-29
BEND3	1.63842	0.712307	1.45147e-29	9.74567e-28
TRIM2	1.63825	0.712154	1.00459e-11	1.02068e-10
SLC7A5P1	1.63742	0.711429	2.82606e-41	7.47479e-39
NHSL1	1.63719	0.711222	7.83567e-24	2.90069e-22
XRCC2	1.63616	0.710312	3.86028e-25	1.66033e-23
EXOSC4	1.63596	0.710134	3.85534e-26	1.8307e-24
IGKV1.16	1.63535	0.709603	0.000344992	0.00124077
GAPDH	1.63521	0.709477	4.08185e-30	2.89525e-28
EFS	1.63516	0.709428	1.07885e-11	1.09306e-10
IRX6	1.63512	0.709399	8.56895e-16	1.35746e-14
LGALS2	1.63511	0.709384	7.43084e-12	7.6626e-11
PLA2G4A	1.63454	0.70888	2.02331e-12	2.22635e-11
TMEM132A	1.6339	0.708316	7.45271e-15	1.07174e-13
UQCRH	1.63349	0.70796	1.64469e-44	6.51e-42
DDX11	1.6333	0.70779	4.8848e-33	4.75068e-31
CHST4	1.6328	0.707348	1.77921e-20	4.64302e-19
IGKV1.8	1.63234	0.706938	3.66652e-06	1.82318e-05
LINC00518	1.63224	0.706855	2.25186e-20	5.83073e-19
RHBDF2	1.63203	0.706667	4.67965e-33	4.57474e-31
PUM3	1.63164	0.706319	4.80265e-36	6.56617e-34
LINC02001	1.631	0.70576	3.81412e-32	3.38912e-30
LINC01311	1.63097	0.705735	1.39811e-41	3.76837e-39
AC083841.1	1.63089	0.705661	3.22589e-28	1.90398e-26
UHRF1	1.63065	0.705443	7.99322e-19	1.74819e-17
AC243964.3	1.62987	0.704758	1.50346e-26	7.53088e-25
CD79B	1.6285	0.70354	3.59798e-11	3.43892e-10
NOTCH1	1.62711	0.702312	4.91702e-24	1.86913e-22
FAM111B	1.62695	0.702167	1.96671e-13	2.41947e-12
MIR25	1.62679	0.70203	7.37876e-13	8.5079e-12
TYMSOS	1.62646	0.701731	5.02362e-19	1.12213e-17
BYSL	1.62626	0.701557	2.42768e-37	3.87075e-35
CCNB1	1.62618	0.70149	2.3007e-23	8.17478e-22
C19orf57	1.6259	0.701235	1.02497e-21	3.06151e-20
CENPM	1.6257	0.701057	2.4422e-21	6.97092e-20
ZHX1.C8orf76	1.62495	0.700399	1.78172e-42	5.25254e-40
FSD1	1.62448	0.699978	3.40447e-22	1.06171e-20
MTSS1L	1.62414	0.69968	7.05894e-23	2.3656e-21
AC055822.1	1.62386	0.699432	6.48861e-27	3.39434e-25
FAM72B	1.62365	0.699243	6.24152e-31	4.89311e-29
TUBB2B	1.62337	0.698991	3.75165e-08	2.46805e-07
HK3	1.62176	0.697557	1.2094e-15	1.87966e-14
IGHV3.66	1.62166	0.69747	1.84632e-05	8.23979e-05
KRT7.AS	1.62071	0.696627	6.87744e-12	7.127e-11
ECEL1	1.62056	0.696491	4.76046e-11	4.48413e-10
MAGOH	1.62041	0.696361	3.90046e-47	2.53763e-44
CA6	1.61977	0.695789	1.49022e-16	2.56615e-15
AP000924.1	1.61951	0.695557	3.47226e-26	1.65854e-24
KDM7A.DT	1.61939	0.69545	1.62943e-18	3.43498e-17
MCM5	1.61929	0.695364	6.94054e-36	9.37586e-34
CCDC77	1.61926	0.69533	1.10848e-33	1.16189e-31
GPRC5B	1.6184	0.694566	1.49161e-15	2.29862e-14
KRTDAP	1.61659	0.692958	1.01756e-10	9.18594e-10
FGFBP2	1.61644	0.692817	1.57202e-10	1.38532e-09
IGHV3.49	1.61569	0.692149	0.000536116	0.00186236
SCRIB	1.61558	0.69205	9.09174e-25	3.77004e-23
INA	1.6155	0.691984	1.30626e-14	1.82201e-13
CCL5	1.61541	0.691897	3.73683e-08	2.45915e-07
NPR3	1.61489	0.691436	1.8268e-10	1.59815e-09
PLAGL1	1.6144	0.690994	9.816e-17	1.72602e-15
CSTB	1.61395	0.690599	1.03231e-23	3.79666e-22
KRT4	1.61342	0.690121	1.41992e-08	9.83247e-08
C2CD4D	1.61327	0.689987	3.78339e-21	1.06224e-19
GTPBP4	1.61275	0.689522	1.86241e-38	3.49059e-36
LINC01667	1.61247	0.689276	3.29444e-19	7.50389e-18
CDK2AP1	1.61166	0.688545	6.13644e-26	2.84934e-24
RIPK2	1.61094	0.687906	6.17109e-32	5.38207e-30
IGHV2.5	1.61071	0.687701	0.000170414	0.000646412
ACE2	1.6107	0.687685	9.84677e-12	1.00152e-10
SLC25A37	1.60967	0.686765	5.18577e-19	1.15698e-17
UBASH3B	1.60956	0.686665	1.7109e-19	4.01495e-18
STRA8	1.60954	0.68665	3.92448e-15	5.80286e-14
FAT2	1.60938	0.686505	2.45827e-12	2.67737e-11
GAPDHP35	1.60886	0.686039	1.15326e-11	1.16503e-10
IGHV2.26	1.60878	0.685967	0.000423021	0.00149715
INCENP	1.60836	0.685591	8.98083e-27	4.60864e-25
DDIAS	1.60802	0.685285	1.85653e-23	6.68044e-22
SLC15A2	1.60774	0.685033	4.83935e-13	5.69119e-12
PRKCQ.AS1	1.60771	0.685004	1.55528e-21	4.54711e-20
FEN1	1.606	0.683475	1.71446e-29	1.14571e-27
RPS19	1.60575	0.683252	4.01842e-29	2.5788e-27
FBXO32	1.60569	0.683193	3.22899e-14	4.32995e-13
AC092803.2	1.60559	0.683101	7.94481e-23	2.64369e-21
SLC26A9	1.60519	0.682746	4.64965e-22	1.4311e-20
ERCC6L	1.60506	0.682629	1.24283e-21	3.67796e-20
AL121832.2	1.60448	0.682108	1.71573e-18	3.61017e-17
MUTYH	1.60408	0.681748	5.40153e-45	2.26472e-42
POLD1	1.60404	0.681712	8.69147e-35	1.01643e-32
FOXL1	1.60312	0.680885	1.46026e-21	4.28703e-20
DDN	1.6026	0.680412	5.64119e-33	5.45816e-31
SCNN1B	1.60245	0.680277	1.36782e-06	7.25258e-06
ATP6V0A4	1.60231	0.680157	1.46836e-07	8.94929e-07
CLEC7A	1.60166	0.679569	2.24461e-13	2.74168e-12
OR2S1P	1.60139	0.679328	1.3185e-22	4.29896e-21
LRFN1	1.60135	0.679288	2.1646e-18	4.50444e-17
BARX2	1.6012	0.679152	3.74634e-07	2.15039e-06
NUDCD1	1.60116	0.679114	2.70785e-30	1.95747e-28
GPSM2	1.6008	0.678793	7.18496e-24	2.6769e-22
PANX2	1.60076	0.678754	2.10154e-11	2.06155e-10
WDR62	1.60064	0.678648	4.36045e-25	1.85991e-23
ATP2A1.AS1	1.60053	0.678553	2.40055e-20	6.20438e-19
EPOP	1.60052	0.678544	3.17256e-13	3.80937e-12
LBR	1.60018	0.67823	5.14945e-21	1.42737e-19
TMEM171	1.59974	0.677841	9.24863e-21	2.48416e-19
DHDH	1.5996	0.677712	3.56372e-18	7.2585e-17
C19orf48	1.59956	0.677673	8.61877e-31	6.66447e-29
FAM90A1	1.59871	0.676908	3.38203e-17	6.25179e-16
RPS20P14	1.5987	0.676895	1.14421e-16	1.99953e-15
CHAF1B	1.59755	0.675861	1.41925e-27	7.85264e-26
LINC00634	1.59755	0.67586	1.33317e-46	7.70003e-44
RAB6B	1.5972	0.675543	5.92734e-17	1.06847e-15
CTLA4	1.59704	0.675402	1.59637e-13	1.98457e-12
S100A6	1.59666	0.675057	7.98655e-12	8.20873e-11
MGAM2	1.59656	0.674969	2.81983e-14	3.80744e-13
AC015712.6	1.59627	0.674706	5.22364e-24	1.97375e-22
VPREB3	1.59574	0.674225	1.9497e-10	1.69963e-09
CENPI	1.59492	0.673486	8.00699e-22	2.41327e-20
TMEM71	1.59466	0.673253	4.94723e-17	8.99239e-16
EMILIN3	1.59461	0.673203	2.56324e-14	3.48343e-13
CTSC	1.59457	0.673167	1.50836e-17	2.89411e-16
PLA2G2D	1.59447	0.673081	3.06331e-07	1.78109e-06
RIMS3	1.59389	0.67255	6.47471e-20	1.59617e-18
NEIL3	1.59328	0.672003	8.81772e-21	2.37667e-19
ALDOC	1.59295	0.671702	2.01954e-09	1.55018e-08
HMGB1P1	1.59269	0.671467	1.01323e-22	3.34017e-21
AC015912.3	1.59183	0.670689	1.0546e-14	1.48674e-13
AC011487.2	1.5903	0.669299	1.49848e-12	1.66896e-11
HMGB2	1.59027	0.669268	3.35372e-23	1.16817e-21
AC022509.1	1.59023	0.669238	9.56019e-20	2.31053e-18
SPEG	1.59009	0.66911	1.12946e-19	2.70774e-18
IL1R2	1.58868	0.667833	2.15431e-19	5.00157e-18
PRIMA1	1.58868	0.667828	1.35451e-13	1.69845e-12
FOXQ1	1.58811	0.667315	1.07038e-13	1.35721e-12
WASF1	1.58736	0.666632	1.63155e-13	2.02653e-12
PNMA8A	1.58715	0.666441	2.16769e-07	1.29018e-06
TNFRSF13C	1.58705	0.666347	5.07795e-15	7.43461e-14
TSPO	1.58648	0.665832	5.67235e-21	1.56541e-19
CD38	1.5864	0.665754	1.88054e-12	2.07693e-11
KIF11	1.58623	0.665598	2.70287e-18	5.5632e-17
SHCBP1	1.58571	0.665132	6.52506e-19	1.44214e-17
KPNA2	1.5856	0.665033	5.75634e-18	1.15253e-16
DAPK1	1.58534	0.664796	5.75275e-15	8.37492e-14
PCP4	1.58498	0.664466	7.13635e-10	5.78948e-09
IGLV7.43	1.58482	0.664319	0.000148273	0.000568562
IGLV3.10	1.58475	0.664255	0.00156063	0.0049385
AC023983.2	1.58439	0.663925	6.58907e-25	2.76467e-23
IGLV3.27	1.5839	0.66348	0.00022288	0.000829419
RPL8	1.58389	0.663471	1.28675e-25	5.78494e-24
KCTD14	1.58364	0.663244	1.23966e-09	9.77185e-09
SOX9	1.58354	0.663156	3.11462e-10	2.64388e-09
MTERF3	1.58323	0.662868	5.00964e-33	4.86373e-31
CYBA	1.58196	0.661714	5.53906e-14	7.24739e-13
SLC27A6	1.58194	0.661698	2.77668e-10	2.37374e-09
IGKV2.29	1.58146	0.661257	0.000183443	0.000692215
CCHCR1	1.58119	0.661014	9.58078e-28	5.39057e-26
RPL23AP49	1.58084	0.660689	1.416e-14	1.96925e-13
DPH2	1.58063	0.660502	2.51789e-46	1.34451e-43
JPT1	1.57977	0.659716	7.93117e-20	1.935e-18
KRT6C	1.57973	0.65968	2.94111e-11	2.84035e-10
AKR1B15	1.57968	0.659636	2.49296e-08	1.67725e-07
FBXL6	1.57929	0.659273	5.55746e-24	2.0929e-22
LY6E.DT	1.57925	0.659238	8.69029e-20	2.11383e-18
AC011445.2	1.57912	0.659124	8.82579e-16	1.39619e-14
DTX4	1.57891	0.658933	7.52816e-12	7.76013e-11
PRR7	1.57885	0.65887	1.63471e-15	2.50957e-14
TLX3	1.57881	0.658842	3.97029e-19	8.96038e-18
DCAF13	1.5788	0.658826	5.82805e-33	5.61975e-31
SEC14L4	1.57873	0.658761	9.9972e-25	4.11835e-23
RRAGD	1.57846	0.658516	1.88748e-15	2.88121e-14
PLTP	1.57813	0.658214	5.80232e-15	8.44275e-14
KCNE5	1.57778	0.657894	4.46106e-21	1.24387e-19
CIART	1.57734	0.657494	3.12513e-12	3.35971e-11
ICAM1	1.5773	0.657459	1.16045e-11	1.17146e-10
ARHGAP31.AS1	1.57728	0.657442	9.76138e-24	3.59709e-22
SOD2	1.57667	0.656885	1.96356e-17	3.71711e-16
DKC1	1.57633	0.65657	1.84781e-44	7.16369e-42
FXYD6	1.5762	0.656446	3.66837e-16	6.06948e-15
POLQ	1.57603	0.656292	3.82924e-23	1.32646e-21
LCK	1.57601	0.656275	3.32789e-10	2.81689e-09
KRT9	1.57583	0.656112	6.06721e-22	1.84155e-20
PSMG1	1.57534	0.655661	2.50936e-32	2.28352e-30
CYB5R2	1.57456	0.654953	2.32879e-14	3.17242e-13
SLCO4A1	1.57432	0.654725	1.16343e-14	1.63163e-13
TUBB	1.57371	0.654168	1.39186e-37	2.33083e-35
AL353764.1	1.57252	0.653078	6.82335e-32	5.92355e-30
MHENCR	1.57249	0.653052	7.29459e-19	1.60532e-17
SPDYC	1.57247	0.653031	0.000194084	0.000728823
ITGB8	1.57245	0.653015	6.46624e-09	4.65237e-08
AC245100.3	1.57232	0.652895	1.45547e-11	1.45116e-10
LINC00960	1.57206	0.652653	3.1783e-16	5.28646e-15
AL121760.1	1.57202	0.652619	5.96098e-19	1.32315e-17
TMPRSS5	1.57196	0.652567	7.25864e-19	1.59803e-17
ANKRD13B	1.57186	0.652475	1.17697e-15	1.83069e-14
RNU6.1042P	1.57153	0.652168	1.33046e-24	5.38693e-23
AC104117.3	1.57105	0.651725	4.63372e-23	1.5886e-21
ZNF488	1.56981	0.65059	2.707e-23	9.54072e-22
TRNP1	1.56968	0.65047	1.75511e-14	2.41945e-13
MFSD4A	1.56965	0.650445	1.44362e-15	2.2283e-14
NPPC	1.56953	0.650333	9.67411e-11	8.75838e-10
PUF60	1.56859	0.649473	1.59017e-31	1.3295e-29
C17orf53	1.56858	0.649457	1.11613e-31	9.44323e-30
GMNN	1.56842	0.649314	2.12102e-24	8.40593e-23
CCNA1	1.56793	0.648862	1.50972e-14	2.0929e-13
YBX1P1	1.56672	0.647745	8.26992e-37	1.21268e-34
TUBA4A	1.56629	0.64735	9.12433e-11	8.28582e-10
MRPL2	1.56628	0.647341	2.21741e-36	3.099e-34
TAP2	1.56614	0.647214	4.23169e-16	6.94468e-15
AL844908.1	1.5659	0.646988	9.86296e-19	2.12915e-17
EYA2	1.56556	0.646678	2.92467e-08	1.95146e-07
FOLH1	1.56551	0.646635	1.75299e-14	2.41711e-13
MGAT3	1.56538	0.646512	4.85615e-13	5.70975e-12
MMP9	1.56497	0.646134	9.65357e-06	4.5076e-05
MCM6	1.56495	0.646119	2.087e-27	1.14133e-25
PAK1IP1	1.56481	0.645989	9.6531e-36	1.27362e-33
POU2AF1	1.56463	0.645818	1.63249e-09	1.2677e-08
ADORA2B	1.56446	0.645662	4.84772e-15	7.11114e-14
NPW	1.56416	0.645391	1.78052e-09	1.3766e-08
ASNS	1.56397	0.645213	1.02101e-17	1.9928e-16
RASL10B	1.56384	0.64509	4.55392e-13	5.37226e-12
PRELID3A	1.56336	0.644649	1.95949e-23	7.01524e-22
AC131206.1	1.56224	0.643619	2.75398e-07	1.612e-06
AL645608.6	1.56204	0.643435	1.09988e-14	1.54671e-13
ELOVL4	1.56152	0.64295	4.24214e-14	5.61012e-13
EDN1	1.56112	0.64258	3.82156e-09	2.83624e-08
MAMLD1	1.56067	0.642169	3.44852e-15	5.14208e-14
FOXC2	1.56062	0.642124	1.52055e-10	1.34185e-09
CXCL9	1.56034	0.641862	0.000372931	0.00133312
PLEKHG1	1.56001	0.641556	1.04923e-15	1.64329e-14
MIR3142HG	1.55989	0.64144	2.49977e-18	5.16771e-17
IGHV1.3	1.55885	0.640482	1.92903e-05	8.58321e-05
GRHL3	1.55864	0.640284	1.53249e-12	1.70551e-11
AC005005.3	1.55822	0.639897	3.57857e-26	1.70357e-24
B4GALT2	1.55791	0.639612	9.29919e-41	2.37096e-38
KLC3	1.55779	0.639497	3.19099e-16	5.30601e-15
COA7	1.55764	0.639358	3.22776e-37	4.96461e-35
PCOLCE2	1.55762	0.639343	2.36708e-07	1.40148e-06
RNASEH2A	1.55739	0.639133	5.79813e-32	5.0646e-30
ANGPTL4	1.55738	0.63912	5.87776e-07	3.29138e-06
ATAD3B	1.5561	0.637939	3.21351e-22	1.00617e-20
C1orf198	1.55606	0.637901	5.57494e-25	2.36016e-23
NOP16	1.55602	0.637862	2.05975e-36	2.90014e-34
RRAS2	1.55571	0.637576	1.75936e-16	3.0022e-15
MAGEA4	1.55565	0.637522	1.5322e-07	9.31334e-07
AC126773.2	1.55545	0.637331	1.07393e-33	1.12986e-31
CASC10	1.55537	0.637258	1.29541e-16	2.25331e-15
CHEK2	1.5535	0.635522	7.74933e-35	9.19555e-33
BACE2	1.55341	0.635436	1.15888e-12	1.30512e-11
SEL1L3	1.55262	0.634709	3.71821e-11	3.55024e-10
PLCG2	1.55235	0.634454	6.4527e-19	1.42726e-17
AP001830.1	1.55233	0.634436	4.94187e-22	1.51282e-20
SNHG17	1.55217	0.634284	9.75871e-25	4.03184e-23
ECHDC3	1.55214	0.634254	8.14065e-16	1.29432e-14
WDR4	1.55152	0.633686	9.57654e-40	2.151e-37
AL023803.2	1.55129	0.633466	3.53223e-31	2.86435e-29
S100A11	1.5505	0.63273	2.01409e-15	3.06786e-14
LINC02515	1.55037	0.632615	4.6488e-11	4.38406e-10
SERPINB7	1.54995	0.632218	2.63886e-09	1.99313e-08
NUDT1	1.54934	0.631651	1.50893e-28	9.2035e-27
SCPEP1	1.54918	0.631504	4.10999e-16	6.75671e-15
MESP2	1.54905	0.631382	8.05318e-11	7.36153e-10
BOC	1.54888	0.631223	2.80577e-11	2.71611e-10
MYO10	1.54886	0.63121	6.4232e-13	7.46695e-12
RF00410.2	1.54865	0.631016	4.46572e-18	9.01779e-17
OR7E62P	1.54864	0.631004	8.07864e-11	7.38242e-10
SH3BP1	1.54845	0.630826	1.64365e-27	9.06762e-26
DIPK2A	1.54832	0.630705	3.80411e-14	5.07114e-13
POLR1E	1.54826	0.630645	3.34111e-34	3.71539e-32
TEX30	1.54707	0.629535	9.35921e-26	4.2482e-24
CCDC86	1.5468	0.62929	3.62108e-31	2.92382e-29
FRMD3	1.54632	0.628839	5.20339e-12	5.45209e-11
IGHV2.70	1.54611	0.628645	0.00105312	0.00344418
THEMIS2	1.54579	0.628344	6.47849e-17	1.1608e-15
LTBP1	1.54567	0.628236	4.66803e-12	4.91938e-11
AL670729.1	1.54527	0.627856	2.89287e-15	4.3387e-14
RHBDL2	1.54489	0.627506	1.45629e-17	2.798e-16
MRPL11	1.54477	0.627388	9.0264e-36	1.19932e-33
VASN	1.54457	0.627204	5.55059e-14	7.25911e-13
LINC01133	1.54443	0.627072	5.19006e-06	2.52682e-05
AC046185.3	1.54407	0.626737	2.1929e-19	5.08491e-18
ETV3L	1.54354	0.626241	9.66592e-23	3.19201e-21
SPAAR	1.54304	0.625774	1.84652e-13	2.27705e-12
AP000344.1	1.54294	0.625678	7.01267e-14	9.07894e-13
CPNE7	1.54282	0.625567	1.85365e-07	1.11227e-06
FMNL2	1.54226	0.625045	1.29163e-14	1.80294e-13
MIIP	1.54218	0.624973	3.49506e-29	2.25573e-27
HDGF	1.54187	0.624684	5.12805e-39	1.06117e-36
ANXA3	1.54153	0.62436	3.81857e-07	2.18963e-06
PDZK1IP1	1.54136	0.624203	0.000207438	0.000775879
PABPC4	1.54096	0.623831	3.04354e-38	5.59319e-36
OPRK1	1.54086	0.623736	2.30084e-22	7.33701e-21
RIOK1	1.54066	0.623551	7.32851e-35	8.71446e-33
SOCS1	1.54057	0.623465	6.50617e-12	6.75215e-11
AIM2	1.54056	0.623451	2.53768e-10	2.17997e-09
NRG2	1.54044	0.623346	7.1888e-19	1.58327e-17
AC068580.2	1.54014	0.62306	1.36951e-17	2.63932e-16
PLOD1	1.54013	0.623053	1.67772e-22	5.39558e-21
FAM89A	1.53999	0.62292	1.39123e-13	1.74141e-12
RNU6.8	1.53998	0.622914	2.85724e-14	3.85428e-13
SLC4A11	1.53992	0.62286	4.24345e-09	3.12704e-08
PPAN	1.53989	0.622827	3.15142e-22	9.88785e-21
KIAA1549L	1.53989	0.622826	5.94349e-12	6.19431e-11
TGIF2	1.53968	0.622631	5.74218e-21	1.5816e-19
AC119424.1	1.53954	0.622499	6.41522e-16	1.03128e-14
CCL19	1.53927	0.622247	0.00143551	0.00457762
FOXD3.AS1	1.53921	0.622187	9.02667e-07	4.9227e-06
IGSF23	1.53875	0.621763	6.30903e-25	2.65505e-23
CD300E	1.53872	0.621732	1.72473e-17	3.29141e-16
LPIN1	1.53869	0.621705	1.79251e-16	3.05326e-15
AC011450.1	1.53866	0.621674	8.18488e-18	1.61197e-16
AC139453.2	1.5386	0.621621	9.30931e-09	6.57917e-08
ABRACL	1.53841	0.62144	1.051e-18	2.25764e-17
AC103702.2	1.53839	0.621418	1.41076e-15	2.18115e-14
AC022144.1	1.53829	0.621329	1.01917e-17	1.9899e-16
ZSWIM4	1.53818	0.621228	4.27603e-24	1.63425e-22
ADAT2	1.53816	0.621204	7.60062e-38	1.32372e-35
IL2RG	1.53813	0.621175	1.46087e-07	8.90745e-07
SAA4	1.53781	0.62088	1.04667e-14	1.47629e-13
DIAPH3	1.53771	0.620782	1.13099e-15	1.76285e-14
LINC01679	1.53709	0.620204	6.33742e-25	2.66501e-23
BX842568.2	1.53701	0.620127	8.5216e-28	4.81377e-26
FAM72A	1.53698	0.620096	7.90007e-31	6.13388e-29
BCL2L14	1.53687	0.619995	8.15935e-15	1.16773e-13
DDX12P	1.53637	0.619523	1.20385e-24	4.90924e-23
ALDH1A3	1.53603	0.619202	1.40623e-09	1.10182e-08
RRM2	1.53597	0.619147	3.95634e-11	3.76617e-10
SNHG19	1.53551	0.618713	7.52015e-12	7.75329e-11
PITPNM2	1.53549	0.618695	1.4536e-22	4.71501e-21
IGHV3.53	1.53536	0.618572	0.000337297	0.00121486
RAD54B	1.53534	0.618558	1.11258e-30	8.41904e-29
AC103810.3	1.53497	0.618208	1.59211e-08	1.09671e-07
BCL2L10	1.53414	0.61743	1.20261e-19	2.87581e-18
RANBP1	1.53302	0.61638	4.23171e-37	6.4388e-35
IGHV3.64	1.53281	0.616176	5.51831e-05	0.000227592
DLL3	1.53273	0.616101	6.19872e-16	9.98463e-15
SERPINE2	1.53246	0.615847	2.07929e-09	1.59453e-08
MCM3	1.532	0.615415	2.25072e-29	1.47619e-27
ARTN	1.53191	0.615335	3.61124e-10	3.04308e-09
CRLF1	1.53116	0.614625	1.14067e-07	7.05467e-07
FAM83B	1.5309	0.614378	4.52885e-07	2.57475e-06
ZFP57	1.53076	0.614252	4.20788e-07	2.40216e-06
KIAA1755	1.53066	0.614156	1.37941e-13	1.72814e-12
IGKV1.9	1.5305	0.614007	0.00175125	0.00548677
E2F5	1.52994	0.613474	1.88338e-23	6.75986e-22
AP003469.2	1.52971	0.613256	6.34206e-10	5.18747e-09
SRPK1	1.52921	0.612782	3.28304e-26	1.5748e-24
CDKN2C	1.52901	0.6126	3.01297e-19	6.90166e-18
ST8SIA6.AS1	1.5287	0.612302	0.000170637	0.000647171
ARHGAP11A	1.52837	0.611995	3.2055e-15	4.78981e-14
IGKJ5	1.52828	0.611908	0.000303558	0.00110297
PTP4A3	1.52825	0.611878	3.78481e-20	9.57228e-19
AC083880.1	1.52783	0.611488	1.18848e-20	3.15971e-19
SLC35F3	1.52746	0.611132	4.18226e-09	3.08556e-08
TRMT1	1.52737	0.611046	1.18592e-31	1.00187e-29
AC020928.2	1.5273	0.610985	7.99907e-20	1.95073e-18
SRM	1.52725	0.610934	9.72442e-26	4.40337e-24
LYN	1.52722	0.61091	6.69156e-16	1.07296e-14
HMMR	1.52718	0.610872	8.75024e-15	1.24756e-13
PGLYRP4	1.52645	0.610177	4.37673e-18	8.84441e-17
MAGEB4	1.52628	0.610015	1.79129e-19	4.1949e-18
FGFR4	1.52626	0.609997	2.08083e-06	1.07443e-05
AARD	1.52578	0.609546	0.000375719	0.0013425
ZNF711	1.52578	0.609544	2.68274e-09	2.02465e-08
AL445250.1	1.52508	0.608884	2.10213e-18	4.38088e-17
LAMB3	1.52507	0.608877	5.43655e-06	2.63616e-05
U62317.4	1.52463	0.608461	8.29304e-13	9.50785e-12
CHTF18	1.52444	0.608278	8.34691e-18	1.6416e-16
ALPL	1.52429	0.608133	6.98601e-09	5.00344e-08
AC105219.2	1.5242	0.608057	3.25791e-13	3.90521e-12
ZNF492	1.52362	0.607508	4.02954e-24	1.54841e-22
UPP1	1.52362	0.607504	2.83655e-20	7.26065e-19
CDCA4	1.52274	0.606667	1.28819e-30	9.6575e-29
SLC29A2	1.52256	0.606504	1.23885e-16	2.15692e-15
RASGEF1B	1.52238	0.606327	2.01911e-21	5.83985e-20
HSF1	1.52233	0.60628	5.11958e-27	2.69561e-25
COLCA2	1.52223	0.606187	1.87967e-14	2.58299e-13
CIP2A	1.52216	0.606122	2.81349e-16	4.70456e-15
SNHG26	1.52211	0.606077	1.60253e-21	4.67801e-20
GALNT3	1.52207	0.606034	2.49372e-06	1.27242e-05
DGCR5	1.5215	0.605492	1.42236e-21	4.1866e-20
JRKL	1.52136	0.605364	1.91598e-16	3.25396e-15
CGAS	1.52129	0.605295	2.81999e-18	5.79373e-17
ULBP2	1.52127	0.605275	4.4228e-11	4.18697e-10
HGH1	1.52095	0.604973	1.27881e-23	4.66386e-22
SFN	1.52088	0.604902	4.8154e-08	3.12642e-07
FCHO1	1.52067	0.604704	3.40376e-14	4.55568e-13
AC011481.1	1.52009	0.604154	1.40528e-31	1.18366e-29
CLDN1	1.51997	0.604042	1.4932e-05	6.76958e-05
NUSAP1	1.51982	0.6039	1.68119e-13	2.0827e-12
DONSON	1.51982	0.6039	4.24887e-25	1.81642e-23
RPL18A	1.51978	0.603864	2.18263e-23	7.77477e-22
CLPSL1	1.51967	0.603757	1.85485e-05	8.27463e-05
SNORA33	1.51943	0.603529	4.64788e-14	6.12382e-13
FABP5P7	1.5194	0.603499	6.13445e-19	1.36006e-17
EFNA4	1.51938	0.603481	6.78104e-15	9.80133e-14
AL355802.2	1.51918	0.603292	5.03032e-29	3.192e-27
NDUFB9	1.51854	0.602688	3.27632e-23	1.14261e-21
TINCR	1.51852	0.602663	1.72828e-05	7.75151e-05
FANCB	1.51846	0.602607	5.17924e-30	3.62816e-28
AC080038.3	1.51818	0.602346	2.19254e-19	5.08491e-18
CHAC2	1.51817	0.602338	7.777e-23	2.5909e-21
IGHD	1.51804	0.60221	0.000212883	0.000794513
WDR74	1.51772	0.601908	4.3558e-42	1.2266e-39
SNORD93	1.5173	0.601508	1.59352e-18	3.36429e-17
PLCB4	1.51728	0.601486	6.40449e-09	4.61029e-08
DZIP1	1.51691	0.601136	1.96658e-16	3.3357e-15
AC105094.1	1.5169	0.601121	9.17809e-16	1.44868e-14
CCDC82	1.51677	0.601001	1.39547e-20	3.68234e-19
TRPV4	1.51673	0.600962	5.72329e-13	6.68378e-12
RPP40	1.5167	0.600936	2.57627e-29	1.67612e-27
AC018445.1	1.51662	0.600857	3.79985e-22	1.17981e-20
CHAC1	1.51624	0.600499	1.20863e-11	1.2177e-10
IGHJ2	1.51614	0.6004	0.000530396	0.0018443
LSM2	1.5159	0.600172	1.21645e-34	1.39946e-32
PLEKHG6	1.51544	0.599733	7.16059e-13	8.27488e-12
LYPD5	1.51532	0.599626	3.02155e-15	4.5197e-14
PRNP	1.51531	0.599615	1.1699e-13	1.47843e-12
RBM17	1.51508	0.59939	4.84659e-43	1.56758e-40
SOX6	1.51504	0.59936	1.27496e-20	3.38328e-19
CDC123	1.51488	0.599203	1.17919e-35	1.53436e-33
AL122034.1	1.51452	0.598865	6.48409e-19	1.43364e-17
ODAM	1.51439	0.598739	5.93301e-08	3.80231e-07
ST14	1.5143	0.598654	5.43064e-18	1.09002e-16
UPK2	1.51419	0.598543	3.18231e-14	4.26938e-13
LYAR	1.51409	0.59845	1.98321e-37	3.21643e-35
LINC01554	1.51409	0.598448	9.63407e-13	1.0961e-11
CSTA	1.51287	0.597285	2.15742e-06	1.11215e-05
CPSF1	1.51279	0.597209	1.04259e-25	4.71348e-24
PSIP1	1.51278	0.597201	1.73625e-17	3.31005e-16
GNG4	1.51246	0.596897	1.71543e-05	7.69816e-05
AL513165.1	1.51232	0.596765	5.51643e-16	8.957e-15
FAM171A2	1.51214	0.596595	2.05689e-13	2.52657e-12
TMSB10	1.51205	0.596503	8.89076e-18	1.74311e-16
IGLV8.61	1.51098	0.595487	0.00551828	0.0154458
LINC01833	1.51068	0.595198	1.38255e-07	8.4609e-07
OIP5	1.51047	0.595001	2.55474e-18	5.27041e-17
CWH43	1.51028	0.59482	2.62296e-10	2.2481e-09
PELI1	1.51024	0.594782	1.13148e-15	1.76285e-14
STEAP3	1.51017	0.594712	2.00308e-13	2.46207e-12
LINC01871	1.51017	0.594711	2.12545e-09	1.62816e-08
ZFP42	1.50998	0.594534	8.9849e-11	8.16707e-10
AC005696.1	1.50997	0.594523	1.61953e-23	5.86866e-22
FREM2	1.5097	0.594259	2.03376e-12	2.23697e-11
ICAM5	1.50964	0.594205	2.83901e-19	6.52166e-18
DUOXA1	1.50943	0.594005	6.62868e-11	6.12966e-10
ZNF454	1.50936	0.593938	2.1222e-24	8.40593e-23
RPS21	1.50891	0.593503	5.31082e-25	2.2534e-23
SPRR1B	1.5089	0.593502	1.57315e-06	8.26925e-06
RTL8A	1.50864	0.593252	7.79851e-19	1.70825e-17
IGKV1.6	1.50862	0.593226	0.00168312	0.00528973
WWTR1	1.50826	0.592886	1.00307e-15	1.57404e-14
RPRM	1.50787	0.592511	9.50636e-16	1.49674e-14
PLOD2	1.50743	0.592089	1.295e-10	1.1536e-09
AP003100.1	1.50717	0.591839	9.82195e-13	1.11568e-11
MSN	1.50702	0.591695	6.62668e-16	1.06286e-14
SNHG15	1.50687	0.59155	2.56431e-26	1.24588e-24
TSSK5P	1.50684	0.591526	1.50512e-13	1.87815e-12
CLDN23	1.50631	0.591022	1.32823e-11	1.3304e-10
YDJC	1.50542	0.590171	1.15367e-21	3.42422e-20
EEF1E1P1	1.50406	0.588858	6.36609e-30	4.41044e-28
IGLC7	1.50396	0.588767	0.000694728	0.00236544
ETV7	1.50286	0.587711	1.63769e-09	1.27138e-08
TM4SF1	1.50272	0.587574	1.02656e-06	5.55552e-06
SOX15	1.50229	0.587159	6.5243e-10	5.32423e-09
FZD6	1.50187	0.586762	8.22469e-10	6.63437e-09
YEATS2	1.5016	0.586499	1.61567e-26	8.07152e-25
BAMBI	1.50101	0.585933	3.54347e-05	0.00015078
APCDD1L.DT	1.50097	0.585892	1.65252e-13	2.05032e-12
IGHA1	1.5008	0.58573	0.00373071	0.0108485
DANCR	1.50035	0.585299	1.13513e-17	2.20792e-16
AC099568.2	1.50014	0.585094	8.08071e-16	1.28551e-14
SNX22	1.5	0.584965	1.70208e-11	1.68281e-10
DTL	1.49981	0.584782	8.32685e-13	9.54062e-12
MRPS21	1.49979	0.584759	9.05412e-20	2.19478e-18
ADGRE5	1.49978	0.584747	1.02696e-14	1.45102e-13
AL589182.1	1.49963	0.584602	5.29927e-21	1.46758e-19
MEAK7	1.49957	0.584548	4.24977e-20	1.06672e-18
LAMC2	1.49931	0.584295	3.43237e-05	0.00014644
GALNT13	1.499	0.583999	2.88981e-13	3.48093e-12
ZWINT	1.49893	0.583934	4.97275e-16	8.12082e-15
TMEM123	1.4989	0.583902	1.41867e-15	2.19277e-14
MAL	1.4989	0.5839	2.96787e-10	2.5265e-09
SLC25A19	1.49879	0.583797	2.77486e-32	2.513e-30
CARD9	1.49878	0.58379	3.3741e-19	7.67299e-18
CMSS1	1.4984	0.583428	3.25924e-32	2.91898e-30
SLC25A27	1.49821	0.583243	1.26244e-12	1.41695e-11
FAM20A	1.49815	0.58318	5.30471e-13	6.21136e-12
CLIP4	1.49797	0.583012	3.46776e-11	3.32006e-10
PHF19	1.49771	0.582761	1.03374e-24	4.24922e-23
CALHM6	1.49758	0.582634	4.32495e-09	3.18337e-08
AL031587.5	1.49698	0.58205	1.13344e-19	2.71613e-18
NECTIN1	1.49694	0.582012	5.0271e-16	8.20485e-15
ZC4H2	1.49666	0.581747	5.32376e-13	6.23238e-12
NCAN	1.49659	0.581683	4.17528e-10	3.4898e-09
SCEL	1.49658	0.581674	4.11283e-11	3.90792e-10
AC022509.2	1.49629	0.58139	7.13125e-10	5.787e-09
SEPHS1	1.49624	0.581345	6.66126e-35	7.95444e-33
PLK4	1.49621	0.581308	3.11636e-18	6.38409e-17
IL12A	1.4962	0.581305	1.33936e-16	2.32228e-15
AC016205.1	1.4957	0.580824	4.15007e-18	8.41038e-17
FLNA	1.4948	0.579952	1.06984e-13	1.35683e-12
ANXA1	1.49465	0.579804	2.8588e-10	2.43953e-09
NOTUM	1.49411	0.579287	1.30375e-15	2.02067e-14
C20orf27	1.49366	0.578848	4.39415e-20	1.10198e-18
SLC6A17	1.49322	0.578423	2.67212e-12	2.8969e-11
AC064807.1	1.49304	0.57825	1.79906e-20	4.69049e-19
TMEM65	1.493	0.578218	2.24396e-19	5.19692e-18
C8orf82	1.49296	0.578172	6.14447e-21	1.68459e-19
AC004231.1	1.49283	0.578054	1.69238e-16	2.89576e-15
AFDN.DT	1.49259	0.577815	6.78807e-21	1.85344e-19
CDC25C	1.49173	0.576984	7.72153e-16	1.23148e-14
RPS7	1.49162	0.576875	1.1837e-28	7.29848e-27
BX470102.1	1.49151	0.57677	8.85044e-17	1.56499e-15
CCN6	1.49117	0.576447	5.49707e-12	5.74709e-11
HAUS5	1.49099	0.576267	2.00742e-29	1.32738e-27
CCDC18	1.49051	0.575806	8.79566e-28	4.95869e-26
AC025154.2	1.49035	0.575651	2.92095e-08	1.9492e-07
AC141557.2	1.49025	0.575557	6.17476e-20	1.52422e-18
CARMIL2	1.49024	0.575541	4.64129e-13	5.46932e-12
NKG7	1.48997	0.575279	3.29365e-06	1.6493e-05
CXCR2P1	1.48941	0.574743	8.7594e-07	4.78663e-06
NIPAL4	1.48941	0.57474	2.2385e-17	4.21783e-16
RPL30	1.48926	0.574595	1.3202e-28	8.09597e-27
AC098934.1	1.48924	0.574579	7.22267e-11	6.64528e-10
TNNT2	1.48869	0.574043	3.78881e-18	7.69481e-17
EGFL6	1.48857	0.573924	8.17536e-09	5.81405e-08
LAGE3	1.48838	0.573738	6.86209e-17	1.22488e-15
HLA.F	1.488	0.573376	1.81862e-09	1.40357e-08
ETV6	1.48799	0.573362	4.9896e-21	1.38442e-19
HOXC12	1.48772	0.573103	6.79313e-05	0.00027565
IGHV1OR15.2	1.48757	0.572961	8.25159e-06	3.89084e-05
TIGIT	1.48753	0.572921	2.15446e-09	1.64837e-08
RPS20	1.48753	0.572917	4.95961e-26	2.3281e-24
AP002800.1	1.48749	0.572876	9.8257e-31	7.50545e-29
ST3GAL6.AS1	1.48736	0.572755	2.62869e-21	7.47683e-20
DNA2	1.48722	0.572622	5.95347e-19	1.322e-17
FAM189B	1.48697	0.572378	1.50965e-21	4.42513e-20
AL118516.1	1.4862	0.57163	6.3784e-14	8.30909e-13
PNMA6A	1.48607	0.571501	8.99711e-15	1.28018e-13
AL450998.1	1.48582	0.571258	8.47861e-10	6.8246e-09
LINC01740	1.48564	0.571087	3.99147e-15	5.90037e-14
TSPAN6	1.48519	0.570644	8.32577e-13	9.54062e-12
CD320	1.485	0.570461	2.37842e-13	2.897e-12
LINC00857	1.4846	0.57007	3.89468e-16	6.4214e-15
SLC35F2	1.48445	0.569932	1.60527e-11	1.5935e-10
HAUS8	1.48439	0.569873	2.09614e-36	2.94407e-34
DDX11.AS1	1.48407	0.569559	3.27869e-34	3.66036e-32
CXCL2	1.48314	0.568655	7.14319e-08	4.52309e-07
SLC6A16	1.48287	0.568395	5.43556e-18	1.09062e-16
PSORS1C3	1.48278	0.568307	2.99641e-18	6.14615e-17
STOX2	1.48277	0.568299	4.42279e-18	8.9343e-17
CLDN9	1.48275	0.568274	2.05916e-10	1.78843e-09
PUS7	1.48242	0.567951	5.02244e-24	1.90664e-22
ARHGAP22	1.48236	0.567898	8.99285e-22	2.6989e-20
TMEM201	1.48211	0.567652	1.57898e-33	1.62794e-31
AC009533.1	1.48174	0.567294	7.73438e-20	1.89188e-18
DBF4	1.48167	0.567224	6.20581e-26	2.87919e-24
BCL11B	1.48153	0.567092	1.05912e-10	9.53679e-10
POLR2F	1.48151	0.567064	4.36186e-33	4.29358e-31
TTC7A	1.48051	0.566094	1.4821e-23	5.38445e-22
MIR210HG	1.48044	0.566024	2.86562e-12	3.09483e-11
PRDX4	1.48033	0.565919	6.86771e-26	3.17069e-24
HIST1H2AH	1.47988	0.565484	4.70307e-13	5.53667e-12
RNU6.911P	1.47977	0.565375	1.12368e-17	2.18717e-16
ARHGEF19	1.47977	0.565371	1.9076e-15	2.91035e-14
COLGALT1	1.47929	0.564902	1.39058e-33	1.43893e-31
TMEM108	1.47927	0.564883	6.74667e-12	6.99277e-11
AC010547.2	1.47891	0.564537	1.23298e-17	2.39003e-16
PRSS27	1.4786	0.564235	1.81786e-13	2.24318e-12
CD24	1.47851	0.564148	5.06371e-05	0.000209975
GOLGA8A	1.47846	0.564091	3.4246e-09	2.55522e-08
MMP20	1.47837	0.564006	1.07655e-16	1.88653e-15
AC011352.3	1.47768	0.563333	3.27386e-09	2.44856e-08
CLEC4E	1.47747	0.563133	9.35199e-11	8.48439e-10
PIR	1.47732	0.56298	2.38678e-11	2.32765e-10
IGLV2.8	1.47719	0.562856	0.00344851	0.0101094
NES	1.47707	0.562737	6.16619e-09	4.44723e-08
AP003352.1	1.47683	0.562502	9.95905e-22	2.97783e-20
TUBA1C	1.4768	0.562479	7.67998e-23	2.56159e-21
PUS1	1.47675	0.562422	2.91037e-30	2.09584e-28
OXER1	1.47671	0.562385	4.78219e-13	5.62747e-12
HERC5	1.47656	0.562237	2.59356e-09	1.96179e-08
PTGS2	1.47626	0.561946	3.27479e-07	1.89665e-06
MKRN3	1.47605	0.56174	2.98595e-14	4.02014e-13
SLC2A1	1.47581	0.561506	2.77941e-12	3.00631e-11
RLBP1	1.4757	0.561402	2.4263e-18	5.02134e-17
TRIT1	1.47565	0.561346	1.61206e-38	3.07224e-36
EIF3E	1.47533	0.561033	5.71475e-26	2.66666e-24
STK38	1.47527	0.560976	1.71036e-26	8.51451e-25
SDHAF3	1.47506	0.560773	9.94565e-12	1.01122e-10
IFFO2	1.47495	0.560665	3.42729e-14	4.58394e-13
TSNARE1	1.47479	0.560513	2.37168e-21	6.78647e-20
SNAI1	1.47467	0.560388	1.11902e-12	1.26274e-11
Z84484.1	1.47425	0.559979	3.16119e-19	7.21872e-18
AL031651.2	1.4741	0.559836	1.02824e-13	1.30847e-12
OLAH	1.47399	0.559725	1.74969e-16	2.98751e-15
CD8B	1.47335	0.559104	5.64088e-08	3.62659e-07
PRKCQ	1.47295	0.558708	1.88464e-11	1.8565e-10
AL591846.2	1.47287	0.558633	4.34786e-24	1.65946e-22
LMO1	1.47284	0.558604	9.70304e-14	1.23864e-12
SLC6A8	1.4722	0.557978	1.08954e-12	1.23168e-11
HCG11	1.47178	0.557558	2.7107e-13	3.27773e-12
RBL1	1.47164	0.557421	1.69541e-19	3.98023e-18
SLAMF8	1.47145	0.557242	1.23762e-08	8.62391e-08
JAK3	1.4712	0.556997	1.2464e-11	1.25309e-10
CCDC85B	1.47118	0.556976	1.14296e-09	9.05061e-09
CCNB1IP1	1.47105	0.55685	4.22989e-26	2.00352e-24
JPH2	1.47094	0.556735	5.52859e-10	4.55899e-09
TFRC	1.47081	0.556613	3.69993e-11	3.53398e-10
FOXI3	1.47059	0.556394	1.14406e-11	1.15595e-10
KIFC3	1.47057	0.556378	1.47987e-17	2.84233e-16
ATL2	1.47022	0.556033	1.41966e-18	3.01069e-17
AP000880.1	1.47019	0.556002	1.45795e-16	2.51288e-15
RCN1P2	1.47008	0.555898	5.27071e-08	3.40329e-07
NMT2	1.47008	0.55589	9.42897e-20	2.28076e-18
ATP13A5	1.46996	0.555777	2.48027e-07	1.4636e-06
PLAUR	1.46888	0.554713	1.00937e-13	1.28619e-12
TIMM8A	1.46879	0.554631	1.25757e-36	1.79298e-34
RPL18AP3	1.46867	0.554509	7.56021e-15	1.0861e-13
RPL22L1	1.46824	0.554086	1.48163e-16	2.55214e-15
SAC3D1	1.46821	0.554056	7.61343e-19	1.67029e-17
USP1	1.46797	0.553825	8.50288e-19	1.85108e-17
RPS16	1.46795	0.553798	1.57476e-19	3.71703e-18
PDCD1	1.46786	0.553715	1.1889e-09	9.39207e-09
SERPINH1	1.46785	0.553708	1.13127e-15	1.76285e-14
XPO5	1.46782	0.553678	1.43189e-24	5.78088e-23
AC090152.1	1.46749	0.553355	6.45592e-18	1.28554e-16
PNP	1.46736	0.553223	8.57243e-19	1.86478e-17
AC093627.1	1.46693	0.552797	2.84872e-20	7.28618e-19
AC245884.12	1.46678	0.552657	4.8486e-12	5.09638e-11
TNFAIP2	1.46662	0.552491	6.62542e-10	5.39818e-09
ATP1B3	1.46661	0.552481	9.43125e-25	3.8994e-23
PTPRZ1	1.46618	0.552057	3.61786e-09	2.693e-08
FOXP3	1.46591	0.551799	8.33517e-12	8.54378e-11
AC069544.1	1.46573	0.551616	4.56679e-22	1.40789e-20
LINC02437	1.46566	0.551553	3.77404e-16	6.23339e-15
PEG3	1.46559	0.551478	0.000315816	0.00114369
AC079922.1	1.46537	0.551268	1.38368e-13	1.7331e-12
IGHV4.55	1.46515	0.551048	6.69099e-05	0.000271856
AC010789.1	1.46468	0.550586	2.70948e-14	3.66982e-13
MYCL	1.46465	0.550559	2.29792e-09	1.75009e-08
MYEOV	1.46423	0.550142	3.36485e-06	1.68278e-05
AC010531.6	1.4642	0.550108	1.22276e-14	1.71102e-13
NCBP2.AS2	1.46405	0.549968	6.46104e-29	4.05891e-27
NEURL3	1.46303	0.548956	3.16985e-12	3.40649e-11
RNA5SP283	1.46249	0.548431	2.07687e-09	1.5931e-08
IGLV1.36	1.46242	0.548358	0.000916321	0.0030361
SLC29A4	1.46211	0.548054	5.86357e-11	5.4632e-10
C8orf59	1.46204	0.547983	2.58007e-27	1.39748e-25
IGKV1D.13	1.46198	0.54792	0.000885587	0.0029446
SQLE	1.46196	0.547908	6.54794e-10	5.34198e-09
FOXD3	1.46134	0.547296	4.36821e-14	5.76877e-13
AC026401.3	1.46125	0.547207	1.28289e-17	2.48398e-16
LYPD1	1.46079	0.546753	4.44581e-14	5.86715e-13
TCF3	1.46032	0.546286	1.55671e-25	6.93255e-24
AL049629.1	1.45994	0.54591	1.60423e-26	8.02142e-25
GAREM2	1.45991	0.545875	1.71804e-16	2.9379e-15
ATP11A	1.45989	0.54586	3.23919e-13	3.88442e-12
AL583785.1	1.45971	0.545681	1.42078e-07	8.6827e-07
TFR2	1.45962	0.545589	4.34792e-11	4.12023e-10
RAB29	1.4594	0.545375	8.43801e-13	9.66231e-12
DEPP1	1.45936	0.545337	4.23899e-09	3.12416e-08
IL20RB	1.45923	0.545207	9.68401e-19	2.09132e-17
EME1	1.45897	0.544947	1.13759e-13	1.43952e-12
ICOS	1.45873	0.544715	1.64429e-09	1.27601e-08
BOLA3.AS1	1.4587	0.544679	7.23493e-11	6.65332e-10
CD3D	1.45866	0.544648	1.31396e-05	6.01235e-05
ADCK5	1.4586	0.544582	1.36397e-16	2.36095e-15
SIRPG	1.45857	0.54455	1.66717e-08	1.1466e-07
AC092535.4	1.45833	0.544314	1.91736e-09	1.47554e-08
GRAMD2A	1.45818	0.544169	1.58559e-06	8.33312e-06
RAC3	1.45816	0.544145	4.04781e-11	3.84936e-10
AL592429.1	1.45814	0.544133	4.83373e-24	1.8387e-22
AMTN	1.45806	0.544052	3.41106e-08	2.25552e-07
TRMT61A	1.45791	0.543897	6.75382e-23	2.26738e-21
IFI44	1.4578	0.543795	8.8503e-07	4.83071e-06
ZNF300	1.45775	0.543742	9.89102e-11	8.94331e-10
CCDC124	1.45764	0.543634	2.18307e-17	4.11475e-16
GPR3	1.45762	0.543614	2.58074e-20	6.64279e-19
PPFIA4	1.45749	0.543491	2.72573e-14	3.69006e-13
SNHG25	1.45748	0.543481	9.10281e-10	7.29798e-09
MAP7D3	1.45744	0.543441	3.53242e-15	5.26164e-14
SIRPA	1.45726	0.543258	3.55231e-13	4.23568e-12
HOXC13	1.45683	0.542832	2.99697e-05	0.000129167
RCCD1	1.45666	0.542663	5.77903e-23	1.95637e-21
RF00019.268	1.45661	0.542613	5.40962e-13	6.32897e-12
LYZ	1.45612	0.542127	0.000102304	0.000402658
NUP93	1.45594	0.541951	1.83088e-29	1.21636e-27
AC009495.3	1.45583	0.541846	1.52178e-20	4.00072e-19
ADA	1.4558	0.541812	1.48785e-18	3.15058e-17
RNF150	1.45578	0.541792	1.06766e-09	8.49237e-09
SCNN1G	1.4557	0.541713	6.33969e-05	0.000258586
POPDC3	1.45563	0.541647	1.15927e-11	1.17048e-10
AC024230.1	1.45529	0.541308	9.07857e-22	2.72319e-20
TPD52L1	1.45509	0.541109	1.57889e-07	9.57452e-07
AC006357.1	1.45496	0.540982	1.47573e-14	2.0488e-13
RNF145	1.45493	0.540946	6.22254e-12	6.4756e-11
USP6NL	1.45452	0.540544	1.43907e-21	4.23138e-20
IGHV4.61	1.45443	0.540457	0.000851454	0.00284314
CBR3	1.45408	0.540111	1.13602e-09	9.00074e-09
POLR1C	1.45404	0.54007	4.25307e-36	5.82887e-34
POU4F1	1.45349	0.539521	1.6295e-21	4.75183e-20
NRM	1.45334	0.539372	3.24284e-17	6.01019e-16
LINC01354	1.45333	0.539361	5.71416e-22	1.74076e-20
OPN3	1.45332	0.539349	2.96374e-12	3.19618e-11
UQCRHL	1.45286	0.538897	8.40413e-35	9.91022e-33
AC011270.2	1.45268	0.538718	2.8731e-20	7.34191e-19
FBXO5	1.45233	0.538367	1.58526e-16	2.72153e-15
FAM72D	1.45231	0.538353	6.59982e-23	2.21831e-21
MASTL	1.45227	0.538307	4.10437e-20	1.03297e-18
GPR37	1.45221	0.538247	6.85345e-09	4.91472e-08
KLHDC3	1.45186	0.537907	1.07111e-27	5.99079e-26
MAGEA3	1.45172	0.537767	0.000388396	0.00138368
IGHV3.74	1.45171	0.537754	0.00347084	0.0101659
SPSB1	1.45132	0.537362	7.77316e-14	1.00337e-12
ADRA2B	1.45071	0.536756	3.50325e-20	8.88001e-19
CD3EAP	1.45047	0.536523	1.04225e-32	9.75099e-31
CPNE8.AS1	1.44979	0.535843	1.27238e-16	2.21462e-15
IGHD3.3	1.44969	0.535742	0.000144787	0.00055629
FHL3	1.4496	0.535655	6.65656e-20	1.64029e-18
RP9P	1.44922	0.535277	3.70714e-17	6.8238e-16
COL23A1	1.44861	0.534666	7.40484e-17	1.31719e-15
IGF2BP3	1.4486	0.534658	1.15178e-17	2.23877e-16
TMEM39B	1.44854	0.534597	3.20574e-32	2.87562e-30
CAD	1.44842	0.534484	2.19442e-24	8.67377e-23
UBE2SP1	1.44808	0.534138	8.37291e-15	1.19678e-13
MFAP2	1.447	0.533063	1.2168e-07	7.49761e-07
MRPS12	1.44667	0.53274	1.88594e-21	5.46304e-20
GATA6.AS1	1.44626	0.532331	1.51769e-21	4.4464e-20
AC005863.1	1.44601	0.532074	2.03142e-21	5.87245e-20
AL512598.1	1.44575	0.531823	8.285e-13	9.50056e-12
AC107075.1	1.44567	0.531739	2.21454e-18	4.60329e-17
AC243562.2	1.44479	0.530861	1.33114e-13	1.671e-12
BANF1P2	1.44456	0.530631	4.27089e-21	1.19378e-19
TRIM65	1.44444	0.530511	1.77699e-25	7.83951e-24
AC027228.2	1.44439	0.530462	8.74913e-15	1.24756e-13
TMOD1	1.44425	0.530321	1.90872e-11	1.87957e-10
YBX1P2	1.44423	0.530304	4.41318e-33	4.3292e-31
CAMTA1.DT	1.44347	0.529539	6.2611e-21	1.71452e-19
SCGB3A2	1.44346	0.529529	3.10202e-10	2.63397e-09
C10orf90	1.44344	0.529515	2.16855e-18	4.51101e-17
CHRAC1	1.44282	0.528895	1.0861e-23	3.98321e-22
SPC25	1.44277	0.528842	1.00793e-14	1.4252e-13
PDCD2L	1.44268	0.52875	2.04198e-24	8.11657e-23
RPL7P9	1.44228	0.528351	1.51586e-10	1.33792e-09
SDK2	1.44195	0.528018	8.39827e-08	5.28353e-07
FMO2	1.4418	0.527867	1.43501e-05	6.52774e-05
ADTRP	1.44175	0.527818	1.47362e-10	1.30206e-09
YOD1	1.44114	0.527213	3.91946e-13	4.6519e-12
LIN9	1.44106	0.527132	9.39339e-19	2.03243e-17
TP53BP2	1.44101	0.527085	2.49818e-13	3.03438e-12
FBXO27	1.441	0.527068	6.67629e-08	4.24311e-07
AC020661.1	1.44093	0.526996	1.03676e-30	7.89807e-29
KREMEN2	1.44084	0.52691	3.69322e-07	2.12314e-06
APOBEC3A	1.44077	0.526837	2.45328e-09	1.86263e-08
CTU2	1.44046	0.526532	1.56024e-23	5.66107e-22
STEAP1B	1.44035	0.526418	7.07433e-17	1.26077e-15
MIR4477B	1.44001	0.526079	0.000189752	0.000713833
RTP4	1.43957	0.525636	2.89012e-06	1.46089e-05
SNRPA	1.43928	0.525346	3.20761e-33	3.20207e-31
ANKRD45	1.43923	0.525296	1.45944e-21	4.28683e-20
GABRQ	1.43869	0.52476	1.84453e-10	1.61341e-09
SLC22A31	1.43867	0.524733	7.2508e-13	8.37571e-12
AC022075.1	1.43824	0.524304	1.21597e-10	1.08662e-09
KLHL2P1	1.43768	0.523738	3.20359e-21	9.03936e-20
LINC00665	1.43756	0.523626	2.78594e-14	3.76618e-13
QRICH2	1.43701	0.523067	9.16442e-15	1.30235e-13
SCNM1	1.43695	0.523013	3.93105e-29	2.53134e-27
TRBV28	1.43692	0.52298	1.97096e-05	8.75394e-05
ADGRA3	1.43688	0.522941	3.09083e-15	4.62212e-14
CHST6	1.43683	0.522887	1.29354e-12	1.44927e-11
ZNF667.AS1	1.43658	0.522639	1.74982e-07	1.05455e-06
GLB1L2	1.43645	0.522504	1.69428e-06	8.864e-06
HSD17B2	1.43631	0.522363	4.58647e-11	4.33178e-10
SPINDOC	1.43626	0.522317	1.06559e-21	3.17613e-20
AC139453.1	1.43611	0.522163	3.43676e-07	1.98518e-06
DTD1	1.43591	0.52197	1.49394e-18	3.16231e-17
AL355312.4	1.43579	0.521848	3.0765e-11	2.96452e-10
AC108860.2	1.43577	0.521824	4.46021e-14	5.88478e-13
GAS2L3	1.43573	0.521781	6.38403e-16	1.02714e-14
AP003032.1	1.43571	0.521767	3.82552e-15	5.66987e-14
SLC35G1	1.43563	0.521685	2.36313e-22	7.51872e-21
ZNF521	1.43554	0.52159	9.06895e-08	5.67833e-07
AC097625.1	1.43534	0.521388	1.78244e-11	1.76042e-10
COL26A1	1.43533	0.521384	1.42783e-10	1.26357e-09
PRF1	1.43487	0.520924	3.31129e-07	1.91661e-06
TUT4	1.4348	0.520849	2.30048e-14	3.13536e-13
THORLNC	1.43464	0.520692	1.05992e-18	2.27508e-17
WIPF3	1.43444	0.520486	3.28393e-11	3.15259e-10
TMEM206	1.43442	0.520464	3.16628e-23	1.10696e-21
SELENOOLP	1.43394	0.519988	1.11388e-10	9.99176e-10
DOK5	1.43394	0.51998	5.74384e-10	4.72341e-09
UGT2B7	1.43393	0.51997	2.95208e-10	2.51458e-09
CDKN2D	1.43379	0.519834	1.33998e-16	2.32228e-15
PQLC2L	1.43374	0.519783	6.52529e-16	1.04772e-14
TPI1	1.43344	0.519481	4.58547e-23	1.57301e-21
ST3GAL6	1.43269	0.51873	1.10954e-14	1.55952e-13
ABCA13	1.43263	0.518662	2.11993e-17	4.00242e-16
TTYH3	1.43197	0.517999	1.55895e-14	2.15903e-13
PCDHB9	1.43162	0.517649	1.91096e-10	1.66688e-09
NANOS1	1.43125	0.517271	5.38494e-08	3.4719e-07
ZNF385C	1.43124	0.517265	9.16572e-14	1.17428e-12
TWNK	1.43117	0.517192	5.09793e-25	2.16469e-23
AL136162.1	1.43081	0.516827	3.16158e-19	7.21872e-18
TRIM17	1.43069	0.51671	2.76325e-08	1.84854e-07
AC023403.1	1.43065	0.516668	7.96947e-24	2.94829e-22
CARD17	1.43062	0.51664	7.41369e-12	7.64632e-11
FOXD1	1.43059	0.516611	1.16204e-06	6.23508e-06
NDRG2	1.43033	0.516352	1.24128e-07	7.63602e-07
CYP7B1	1.43028	0.516294	1.33572e-08	9.2766e-08
VSTM2L	1.43023	0.516249	0.000134394	0.000518822
HMGB3	1.43017	0.516189	1.57994e-09	1.22925e-08
AC026740.1	1.42992	0.515938	2.52832e-15	3.82437e-14
NR2C2AP	1.4291	0.515112	3.42292e-23	1.19008e-21
C6orf223	1.42905	0.515055	5.98385e-08	3.83099e-07
AC108673.2	1.42898	0.514989	2.81958e-15	4.23663e-14
PIWIL4	1.42891	0.514914	2.79131e-20	7.15226e-19
IGKV2.30	1.42864	0.514641	0.0014756	0.00469252
IGHV3.43	1.42858	0.514582	0.00201902	0.00623598
DERL3	1.42835	0.514352	1.23336e-07	7.5906e-07
HELLS	1.42823	0.514225	2.64885e-16	4.44237e-15
CCT5	1.42807	0.51407	5.62215e-22	1.71365e-20
CA13	1.42758	0.51357	1.63325e-11	1.619e-10
RPL37P3	1.42755	0.513544	1.63137e-28	9.89697e-27
ZBED2	1.42741	0.513402	9.60436e-11	8.70219e-10
CYC1	1.4274	0.513394	1.9139e-18	4.00631e-17
AC107294.3	1.42721	0.513196	6.35806e-14	8.2845e-13
TMEM147.AS1	1.42721	0.513195	2.83814e-17	5.28957e-16
MRPL4	1.42684	0.512827	1.07603e-22	3.53281e-21
ATXN7L2	1.42678	0.512761	3.53172e-26	1.6841e-24
AC064807.4	1.42676	0.512746	1.02115e-13	1.29973e-12
ZIC4	1.42661	0.512592	7.79416e-20	1.90486e-18
PLEKHB1	1.42583	0.511804	6.96595e-05	0.000282258
AL354718.3	1.42581	0.511785	7.41685e-24	2.75827e-22
SAP30	1.42576	0.511735	3.73837e-16	6.17628e-15
BTG3.AS1	1.42565	0.511617	8.25641e-30	5.67836e-28
JRK	1.42551	0.511483	1.37403e-16	2.37764e-15
GNLY	1.42547	0.511434	1.21947e-06	6.52342e-06
SLC19A1	1.42527	0.511235	1.57594e-19	3.71828e-18
FAM57A	1.42524	0.5112	3.61825e-16	5.99181e-15
MEIG1	1.42522	0.511184	8.59022e-19	1.86722e-17
C21orf91	1.42513	0.511092	3.84845e-14	5.12541e-13
AP001453.2	1.42506	0.511028	1.72029e-10	1.50941e-09
ZNF280B	1.4248	0.51076	9.86765e-17	1.73456e-15
DCLK2	1.4248	0.510757	4.64199e-13	5.46932e-12
CTU1	1.42478	0.510738	2.23271e-21	6.42154e-20
PXDC1	1.42464	0.5106	3.88681e-11	3.70497e-10
ZNF696	1.42461	0.51057	1.98477e-23	7.09229e-22
B4GALNT1	1.4246	0.51056	2.88182e-10	2.45732e-09
S100A3	1.42451	0.510466	4.08971e-14	5.42502e-13
SLC45A3	1.42449	0.510445	9.13654e-11	8.29425e-10
TCF7	1.42446	0.510417	1.3339e-10	1.18564e-09
COL9A1	1.42397	0.509919	1.64541e-10	1.44707e-09
MYRF	1.42383	0.509776	3.36309e-19	7.65103e-18
ILF2	1.4233	0.509237	1.7425e-25	7.69938e-24
SLAIN1	1.42319	0.509128	1.45503e-07	8.87571e-07
KRTCAP3	1.42306	0.508994	5.1204e-06	2.49397e-05
TPM2	1.42304	0.508974	3.91923e-08	2.57142e-07
INTS6L	1.42295	0.508887	9.64848e-15	1.3677e-13
TAF1D	1.42284	0.508772	1.43313e-23	5.20991e-22
AL121820.1	1.42277	0.508707	1.60745e-18	3.39116e-17
TIGD2	1.42243	0.508362	1.44194e-18	3.0568e-17
TMEM249	1.42213	0.508053	4.07488e-32	3.60385e-30
TIMM44	1.42202	0.507937	2.45671e-27	1.33578e-25
AC007098.1	1.42198	0.507897	3.3758e-22	1.05403e-20
EMC3.AS1	1.42181	0.507724	6.41924e-19	1.42041e-17
TRBC2	1.4217	0.507622	9.45153e-05	0.000374004
TIGD5	1.42165	0.507564	1.22898e-17	2.38311e-16
UBALD2	1.42157	0.50749	1.19308e-17	2.31667e-16
LINC02609	1.42156	0.507475	7.00997e-17	1.2497e-15
SNRPD1	1.42149	0.507408	1.32033e-30	9.87227e-29
RHEBL1	1.42147	0.507386	1.65668e-19	3.89416e-18
MYLK.AS1	1.42138	0.507288	5.02043e-22	1.53521e-20
AC013457.1	1.42108	0.506989	1.56336e-09	1.21735e-08
NARF	1.42096	0.506871	1.99573e-26	9.80576e-25
DNMT1	1.42082	0.506722	9.10703e-20	2.20666e-18
FAM49A	1.42079	0.506695	2.69344e-13	3.25756e-12
AL139020.1	1.42044	0.50634	2.73657e-07	1.60231e-06
TFAP2E	1.42044	0.506339	1.23805e-16	2.15618e-15
FAM107A	1.42035	0.506249	6.69079e-06	3.20129e-05
CCDC167	1.42007	0.505958	2.50117e-18	5.16872e-17
ENY2	1.41998	0.505871	1.38592e-29	9.32769e-28
LINC00337	1.41998	0.50587	2.96475e-27	1.59972e-25
NDUFS5	1.41996	0.505854	3.45156e-20	8.75507e-19
NUDT8	1.41943	0.505315	2.04681e-06	1.05812e-05
IGKV6.21	1.41942	0.5053	0.0023238	0.00707084
CXCL3	1.41931	0.505189	2.6375e-21	7.49814e-20
AC007991.2	1.41916	0.50504	4.68548e-09	3.43e-08
TAP1	1.41907	0.504944	1.68931e-07	1.02036e-06
MCCC1	1.41825	0.504115	6.69364e-18	1.32891e-16
B4GALT5	1.41822	0.50408	6.71891e-15	9.71898e-14
AP000527.1	1.41822	0.504076	6.67955e-14	8.67146e-13
YBX2	1.41804	0.503895	4.66148e-07	2.64537e-06
TRIP6	1.41798	0.503837	4.76733e-10	3.95834e-09
PODXL2	1.41773	0.503579	4.24326e-07	2.4209e-06
MCOLN2	1.41747	0.503319	3.67851e-12	3.92481e-11
STX19	1.41735	0.5032	2.62152e-07	1.54052e-06
CCNJL	1.41703	0.502871	5.96313e-10	4.89592e-09
NUDT5	1.41666	0.502495	1.43533e-25	6.40714e-24
VPS72	1.41659	0.502419	4.59276e-28	2.67723e-26
CAVIN3	1.4165	0.502331	2.51776e-09	1.90777e-08
LYG1	1.41638	0.502211	1.26638e-17	2.45393e-16
AL022334.1	1.41637	0.502203	4.508e-31	3.5737e-29
NCAPG2	1.41629	0.502119	9.6574e-15	1.36862e-13
TCOF1	1.41626	0.502091	1.17091e-30	8.82502e-29
AC021087.4	1.4162	0.502029	1.80774e-05	8.08038e-05
ADD2	1.4161	0.501919	1.52285e-09	1.18777e-08
GPT	1.41604	0.501866	4.88953e-06	2.38666e-05
AC108047.1	1.4159	0.50172	8.55884e-21	2.3135e-19
AL731533.2	1.41583	0.501653	1.85243e-21	5.37147e-20
AL138767.3	1.41562	0.501433	2.12168e-15	3.22306e-14
KIFC2	1.41522	0.501027	2.10301e-08	1.42762e-07
RTKN2	1.41515	0.500952	3.14825e-15	4.7055e-14
TMEM97	1.41514	0.500946	6.74748e-11	6.22731e-10
MRPL37	1.415	0.5008	7.45081e-27	3.8762e-25
PHF24	1.41492	0.500716	7.27881e-17	1.29558e-15
IGLV5.45	1.41475	0.500543	0.00494216	0.0139795
S1PR2	1.41458	0.500373	7.83927e-22	2.36398e-20
AC006262.4	1.41448	0.500269	2.39525e-12	2.61225e-11
AC125807.2	1.41446	0.500255	1.05205e-13	1.33635e-12
TNFSF15	1.41442	0.500208	2.12695e-10	1.84364e-09
AC080037.1	1.41441	0.500199	3.87027e-21	1.08502e-19
PCNA	1.41421	0.499995	2.62798e-20	6.75825e-19
AC245041.1	1.41378	0.499555	5.51428e-11	5.15729e-10
AC092821.1	1.41349	0.499265	9.2109e-19	1.99371e-17
PLXNA1	1.41332	0.499086	4.24002e-19	9.55009e-18
HIST3H2A	1.41315	0.498919	0.000517834	0.0018045
ANKRD35	1.41304	0.498802	1.08062e-08	7.58119e-08
CAMKV	1.41302	0.498785	3.03588e-20	7.73507e-19
MRTO4	1.41302	0.498779	4.24978e-32	3.74682e-30
C21orf58	1.41266	0.498414	2.10907e-16	3.57418e-15
IQCG	1.41262	0.498376	5.59249e-16	9.07529e-15
CENPO	1.41235	0.498096	1.6574e-21	4.82822e-20
MSL3P1	1.41229	0.498033	3.83314e-22	1.18949e-20
SNRPA1	1.41212	0.497864	1.94115e-25	8.54379e-24
RF00019.362	1.41211	0.497855	4.07517e-10	3.40965e-09
IRF4	1.41208	0.497821	7.29831e-07	4.03141e-06
KBTBD12	1.41188	0.497622	8.34523e-19	1.81749e-17
DKKL1	1.41149	0.497214	8.27738e-15	1.18372e-13
SLCO5A1	1.41138	0.497107	5.70594e-21	1.57238e-19
ARHGEF26.AS1	1.41133	0.497056	8.8328e-16	1.39691e-14
ADCY2	1.41097	0.496689	4.62397e-09	3.38629e-08
PARPBP	1.41071	0.496425	6.28531e-17	1.1294e-15
RAB42	1.41067	0.496379	1.08117e-13	1.37027e-12
SLC6A2	1.41065	0.49636	1.94507e-16	3.3002e-15
AP001469.3	1.41052	0.496224	8.66697e-19	1.88318e-17
CHAF1A	1.41044	0.496144	6.10607e-20	1.50792e-18
AC005682.1	1.41032	0.496027	3.35405e-14	4.49339e-13
FAM216A	1.41029	0.495987	5.28491e-14	6.93248e-13
TOMM5	1.41019	0.495892	1.95265e-30	1.44099e-28
FOXN3.AS1	1.40961	0.495301	1.36181e-14	1.89715e-13
CAPS	1.40946	0.495142	4.33864e-06	2.13414e-05
P2RY6	1.40918	0.494857	6.76044e-11	6.23825e-10
RASGEF1A	1.40891	0.494579	5.37328e-07	3.02475e-06
IFITM10	1.40877	0.494432	1.54951e-06	8.15183e-06
AC103706.1	1.40858	0.494238	1.26312e-10	1.12626e-09
LINC02570	1.40844	0.494094	1.05091e-18	2.25764e-17
GLS	1.40839	0.494049	3.91939e-13	4.6519e-12
MARCKSL1	1.40837	0.494023	7.53782e-16	1.2032e-14
LCT	1.40835	0.49401	6.31116e-17	1.13276e-15
PSMB2	1.40834	0.494001	8.89036e-29	5.51163e-27
OSBPL3	1.40826	0.493909	3.98455e-12	4.23489e-11
PPP1R14A	1.40823	0.493886	2.32017e-07	1.37515e-06
ZYG11A	1.40793	0.49358	3.97768e-09	2.94422e-08
AL354892.2	1.40788	0.493523	6.02667e-11	5.6041e-10
DMD	1.40778	0.493423	1.3613e-09	1.06884e-08
AL161431.1	1.40766	0.493301	7.28059e-11	6.69095e-10
CCDC71L	1.40764	0.493279	3.14857e-14	4.22912e-13
DRAXIN	1.40748	0.493117	1.02129e-15	1.60174e-14
ADAMTS1	1.40735	0.492976	4.14003e-07	2.36677e-06
MRGBP	1.40734	0.492966	3.15566e-26	1.51627e-24
PFN2	1.40708	0.4927	8.65752e-08	5.43575e-07
CYP1B1	1.40699	0.492612	4.17735e-05	0.000175731
AC004069.1	1.40699	0.492611	1.14684e-20	3.05476e-19
PDE4B	1.40684	0.492459	1.6748e-05	7.52774e-05
SVOPL	1.40679	0.492405	2.61461e-21	7.44427e-20
AL592494.2	1.40599	0.491591	1.66853e-09	1.29373e-08
LINC02036	1.40598	0.49158	8.70088e-08	5.46055e-07
CENPL	1.40598	0.491572	8.19214e-21	2.22181e-19
DGKZ	1.40597	0.491566	1.01703e-22	3.34879e-21
TUBB3	1.40571	0.491298	1.98565e-07	1.18695e-06
SLAMF7	1.40567	0.491256	1.94688e-05	8.65993e-05
FJX1	1.40532	0.490902	7.36562e-10	5.96692e-09
PIK3CD.AS2	1.40522	0.490798	9.32899e-09	6.59143e-08
COQ8A	1.4052	0.490779	2.75211e-18	5.65837e-17
RPIA	1.40504	0.490614	1.54034e-31	1.28974e-29
LEFTY2	1.40496	0.490525	7.46489e-07	4.1174e-06
CCDC137	1.40463	0.490192	6.94729e-18	1.37879e-16
KRT8P12	1.40461	0.490172	5.30734e-23	1.80641e-21
RF00019.67	1.40461	0.490167	2.53381e-21	7.22514e-20
KRT79	1.40443	0.489989	5.64665e-08	3.62989e-07
AC027601.3	1.4041	0.489648	5.58875e-14	7.30733e-13
CD6	1.40403	0.48957	3.3733e-08	2.23212e-07
RELB	1.40401	0.489554	2.04649e-12	2.24967e-11
CLIC3	1.4039	0.489443	3.73268e-05	0.00015813
AL117335.1	1.40372	0.489252	2.03145e-17	3.84177e-16
PRIM2	1.40355	0.489076	6.35277e-24	2.38132e-22
GLI4	1.40343	0.488954	9.26739e-14	1.18623e-12
IVL	1.4032	0.488719	7.76932e-07	4.27698e-06
C7orf61	1.40275	0.48826	4.13375e-20	1.0399e-18
PPARA	1.40265	0.488159	4.08478e-14	5.41976e-13
HOTAIRM1	1.40252	0.488017	3.10916e-09	2.32907e-08
PLOD3	1.40224	0.48773	1.72805e-16	2.95412e-15
PLBD1	1.40201	0.487497	6.82713e-09	4.89771e-08
TKT	1.40196	0.487443	2.15896e-18	4.496e-17
SIT1	1.40163	0.487108	2.16717e-06	1.11708e-05
AC114956.2	1.40129	0.486752	3.22847e-11	3.10356e-10
MX2	1.40117	0.486636	1.43036e-09	1.11933e-08
AP003472.1	1.40114	0.486603	1.96939e-18	4.11942e-17
LIPG	1.40109	0.486546	1.37078e-11	1.37131e-10
CENPU	1.40093	0.486389	2.5806e-10	2.21381e-09
PITPNM3	1.40092	0.486379	1.16831e-12	1.3152e-11
RGR	1.40077	0.486225	5.76586e-20	1.42952e-18
FAHD2A	1.40072	0.486173	6.08419e-24	2.28367e-22
SSRP1	1.40058	0.48602	6.76525e-23	2.26987e-21
LINC01357	1.40049	0.48593	3.50171e-15	5.21726e-14
HNRNPA1P33	1.40044	0.485885	2.68128e-15	4.04277e-14
VWDE	1.40039	0.48583	1.09546e-09	8.70374e-09
AC004967.1	1.39993	0.485351	4.32821e-17	7.90786e-16
CLCN5	1.39962	0.485034	1.53324e-19	3.62659e-18
JMJD4	1.39951	0.484917	8.72251e-22	2.62055e-20
SLC2A14	1.39943	0.484842	1.34117e-14	1.86978e-13
AGPAT4	1.39938	0.484791	1.63252e-13	2.0273e-12
TGFA	1.39935	0.484755	1.46113e-06	7.71223e-06
AC036108.3	1.3993	0.484708	8.43365e-13	9.65927e-12
PAPSS1	1.39929	0.484693	2.38359e-15	3.61013e-14
KNSTRN	1.39925	0.484654	7.69834e-19	1.68761e-17
LINC01883	1.39913	0.484531	1.52328e-22	4.93253e-21
C5orf34	1.39838	0.483758	2.26946e-20	5.87361e-19
MRPL14	1.39815	0.483522	2.86998e-20	7.33725e-19
SLC16A10	1.39779	0.483145	1.06793e-21	3.17975e-20
NDUFAF4	1.39769	0.483045	6.45393e-21	1.76647e-19
MVD	1.39768	0.483039	1.97098e-11	1.93851e-10
TRMU	1.39764	0.482989	5.81202e-26	2.70982e-24
SHMT2	1.39739	0.482733	2.24075e-22	7.14942e-21
IGHD3.22	1.39702	0.48235	3.50079e-05	0.000149143
KLHL34	1.3969	0.482226	9.89093e-20	2.38639e-18
AC245041.2	1.39673	0.482048	8.02888e-15	1.14993e-13
AC027796.4	1.39649	0.48181	5.58752e-15	8.14695e-14
MSANTD3	1.39638	0.481693	4.86745e-23	1.66369e-21
OPTN	1.3963	0.481607	2.82747e-13	3.40947e-12
P2RX5	1.396	0.481298	7.07389e-12	7.31718e-11
INTS13	1.39585	0.481146	7.8273e-21	2.12694e-19
ZAP70	1.39541	0.480689	8.00665e-08	5.04556e-07
AP005233.2	1.39534	0.48062	1.67429e-06	8.76834e-06
NIP7	1.39533	0.48061	5.60844e-25	2.37256e-23
AL589765.4	1.3953	0.48057	2.27895e-10	1.96936e-09
AC091057.1	1.39522	0.480488	1.58885e-19	3.74561e-18
CYP27A1	1.39508	0.480353	1.04219e-07	6.47884e-07
PLS3	1.39506	0.480324	4.58497e-09	3.36121e-08
LINC01139	1.39447	0.479719	0.000324324	0.001172
GNB4	1.39414	0.479377	7.46049e-10	6.03859e-09
FNDC4	1.39395	0.479181	3.96287e-09	2.93403e-08
TATDN1	1.39395	0.479176	3.11875e-21	8.80875e-20
RF00096.18	1.39393	0.479161	7.90259e-11	7.23088e-10
AC144652.1	1.39386	0.479089	1.6143e-11	1.60134e-10
TRAIP	1.39386	0.479087	5.89243e-23	1.99237e-21
TENT4A	1.39374	0.47896	6.23758e-23	2.1028e-21
PROSER2.AS1	1.39373	0.478955	4.06799e-12	4.31677e-11
CEP131	1.39365	0.478867	5.02781e-12	5.27692e-11
TMEM200C	1.39353	0.478742	5.42726e-15	7.92963e-14
E2F7	1.39352	0.47873	3.60604e-10	3.04005e-09
AC011447.7	1.39343	0.478641	1.07624e-08	7.55238e-08
TFAP4	1.39335	0.47856	3.27306e-24	1.27415e-22
RCN3	1.39318	0.478378	3.02625e-07	1.76063e-06
HILS1	1.39308	0.478274	1.01638e-10	9.17823e-10
ACP7	1.39254	0.477719	6.60555e-15	9.56233e-14
AC110749.1	1.39247	0.47765	2.15621e-11	2.11299e-10
TNFRSF12A	1.39182	0.476969	2.52254e-08	1.69573e-07
AC002524.1	1.39154	0.476679	2.61665e-20	6.73218e-19
PNLDC1	1.39138	0.47652	1.35881e-06	7.20956e-06
RF02247	1.39135	0.476488	4.06984e-10	3.4062e-09
LINC00284	1.39126	0.476389	5.42486e-16	8.81843e-15
DEUP1	1.39112	0.476243	2.99173e-24	1.16946e-22
LINC00239	1.39111	0.476241	2.15967e-15	3.27814e-14
RASGRF1	1.39105	0.476175	3.03274e-10	2.5794e-09
RND3	1.39053	0.475634	1.1547e-07	7.13595e-07
H2AFZ	1.39002	0.475109	4.69863e-20	1.17418e-18
AL024507.2	1.39001	0.475095	2.41387e-34	2.7163e-32
IGLV2.18	1.38984	0.474918	0.00274835	0.00822296
AL590326.1	1.38964	0.47471	1.46391e-09	1.14353e-08
SNX8	1.38959	0.474656	3.60291e-20	9.11632e-19
TRPM8	1.38937	0.474434	1.32326e-13	1.6622e-12
STK26	1.38923	0.474287	2.88753e-07	1.68477e-06
AC104794.2	1.38902	0.474068	1.35205e-17	2.60922e-16
NOP56	1.38893	0.473973	3.11742e-29	2.0189e-27
RACGAP1	1.38865	0.473681	7.05538e-12	7.30071e-11
RNU6.140P	1.38861	0.473646	5.36529e-09	3.89941e-08
IMPDH1P8	1.38849	0.47352	4.38063e-30	3.09553e-28
USP2.AS1	1.38841	0.47343	1.90934e-44	7.35188e-42
MT1M	1.38838	0.473406	1.90406e-06	9.89201e-06
PRKDC	1.38833	0.473356	2.11067e-10	1.83008e-09
MAP4K1	1.38823	0.473242	4.40941e-09	3.24047e-08
PDXK	1.3882	0.473213	3.49497e-16	5.79445e-15
TBC1D1	1.38785	0.47285	5.60144e-15	8.16515e-14
TNFRSF4	1.38761	0.472605	3.34287e-10	2.82915e-09
MAF1	1.38742	0.472406	4.25256e-21	1.18925e-19
HEY2	1.38738	0.472362	9.05251e-06	4.2427e-05
IRX4	1.38711	0.472085	6.86586e-05	0.000278442
MDK	1.38705	0.472021	2.88224e-06	1.45752e-05
GPR55	1.38697	0.471932	4.52007e-15	6.64877e-14
SCARB1	1.38688	0.471843	1.01309e-11	1.02912e-10
NSUN5P1	1.38665	0.471601	1.87101e-13	2.30625e-12
PARVB	1.38656	0.471508	5.73182e-17	1.03456e-15
PTMA	1.38622	0.471156	1.86125e-26	9.20093e-25
HNRNPA1P21	1.38621	0.471151	2.72379e-07	1.59582e-06
AC064807.2	1.38618	0.471119	9.50474e-19	2.05496e-17
RPUSD3	1.38582	0.470736	6.26673e-26	2.90507e-24
STOML2	1.38575	0.47067	1.22829e-26	6.21302e-25
YES1	1.38528	0.470178	2.64027e-12	2.86457e-11
AC011005.4	1.38523	0.470126	1.88261e-18	3.94372e-17
AC006946.3	1.38517	0.470061	1.92554e-14	2.6428e-13
SGCE	1.385	0.469889	5.01667e-06	2.4464e-05
DMRTA1	1.38469	0.469566	6.60535e-11	6.11009e-10
IGLVI.70	1.3846	0.469473	0.000105482	0.000414496
SNORD14E	1.3842	0.469049	6.13661e-06	2.95035e-05
[truncated: 24,775 more rows]

## Sheet: CESC
Differentially expressed genes (DEGs) between the low-HPDL subgroup and the high-HPDL subgroup in CESC
HPDL	6.63136	2.72931	7.64056e-66	4.32471e-61
NEFH	5.60425	2.48652	1.45708e-09	5.49824e-07
KRT4	5.26441	2.39627	1.03232e-06	7.93887e-05
CALML5	4.3347	2.11593	0.000123746	0.00295289
TCAM1P	4.27541	2.09606	2.6096e-19	4.92362e-15
SYCP2	4.05229	2.01874	1.21904e-13	3.83335e-10
AC019171.1	3.94598	1.98038	9.35491e-15	4.41256e-11
SMC1B	3.88015	1.95611	9.67428e-16	6.08426e-12
ZNF541	3.62394	1.85756	9.08185e-15	4.41256e-11
GPX2	3.5165	1.81414	0.000135915	0.00316717
CEACAM5	3.40728	1.76862	0.000298132	0.00567986
ADH7	3.22608	1.68978	0.000252611	0.00504133
CXCL17	3.21288	1.68387	1.58236e-05	0.000632966
SCGB1A1	3.16923	1.66413	1.06362e-05	0.000459567
ALOX15	3.04851	1.6081	1.48587e-07	1.88996e-05
GABRP	3.0438	1.60588	0.00040572	0.00712079
KCNS1	2.99784	1.58392	1.49478e-08	3.25361e-06
MIR9.3HG	2.85372	1.51284	9.04011e-10	3.93606e-07
SYNGR3	2.77295	1.47142	1.45936e-12	2.66461e-09
KBTBD12	2.76695	1.4683	3.72444e-09	1.13952e-06
ZFR2	2.76321	1.46634	6.59624e-10	3.08562e-07
SOX2	2.7512	1.46006	0.000699793	0.010784
AKR7A3	2.73875	1.45352	3.04209e-11	2.77723e-08
BCL2L10	2.71549	1.44121	1.07367e-08	2.51124e-06
ST6GALNAC1	2.67531	1.4197	1.77405e-06	0.000118553
AL354766.2	2.66375	1.41346	1.07858e-05	0.000462826
KLHL35	2.64624	1.40395	4.66456e-17	4.40039e-13
TAF7L	2.6316	1.39594	1.93616e-07	2.25055e-05
DMRTA2	2.57596	1.36511	8.23829e-08	1.18772e-05
CHP2	2.57131	1.36251	2.57689e-05	0.000908766
NEURL1	2.56317	1.35793	3.03735e-09	9.63514e-07
CAPNS2	2.55406	1.35279	0.00103119	0.014279
SOX21	2.53521	1.3421	1.52449e-05	0.000612851
RNF212	2.52796	1.33798	1.53078e-07	1.91514e-05
CEACAM6	2.50732	1.32615	0.00242404	0.0267782
HS6ST2	2.50023	1.32206	2.56617e-07	2.78257e-05
SIX2	2.48065	1.31072	3.47887e-07	3.48515e-05
AL161669.3	2.46485	1.3015	7.01243e-13	1.58767e-09
TFR2	2.45701	1.2969	5.94412e-16	4.20561e-12
AC156455.1	2.44877	1.29206	1.48798e-10	9.35806e-08
POF1B	2.39509	1.26008	6.98108e-05	0.00193035
BMP7	2.38391	1.25333	0.000288811	0.00556598
NTS	2.38118	1.25168	0.0133332	0.0907951
TDRD9	2.37318	1.24682	5.45838e-05	0.00159584
HRASLS	2.36122	1.23953	5.66552e-07	5.07879e-05
SPRR1A	2.36014	1.23887	0.0384466	0.18606
YBX2	2.35564	1.23612	8.89098e-09	2.16917e-06
AC090515.4	2.34929	1.23222	1.07896e-06	8.20553e-05
NGB	2.3439	1.22891	2.805e-05	0.000972251
UPK1B	2.34387	1.2289	6.25576e-05	0.00177755
AC046185.3	2.34141	1.22738	3.06427e-14	1.15629e-10
KLRG2	2.33701	1.22467	6.47377e-08	9.98442e-06
AKR1C2	2.3352	1.22355	0.00195181	0.0228975
PODXL2	2.32607	1.2179	6.20292e-10	2.92581e-07
IRX4	2.32568	1.21766	0.000738005	0.0111841
GPC3	2.32285	1.2159	0.000645577	0.0101587
CPNE7	2.30713	1.2061	4.03391e-08	6.9825e-06
PLEKHG4	2.30252	1.20321	7.59597e-14	2.5291e-10
TCP11	2.29709	1.19981	8.00329e-08	1.16154e-05
COCH	2.27663	1.1869	6.25111e-06	0.000306342
GSTA1	2.27276	1.18444	0.00046757	0.00793967
MEI1	2.26749	1.1811	3.9584e-05	0.00125591
RNU6.140P	2.26736	1.18101	0.000164101	0.00363851
ADH1C	2.26307	1.17828	0.000821487	0.0120962
IGFL2.AS1	2.25942	1.17595	1.14364e-05	0.000484885
IGFL1P1	2.25717	1.17452	6.05027e-06	0.00029909
FOXRED2	2.25459	1.17286	2.51373e-12	4.18029e-09
LYPD2	2.24846	1.16894	0.0164668	0.105484
AC020907.1	2.23898	1.16284	1.92315e-08	4.00199e-06
AL121929.2	2.23423	1.15978	3.01474e-08	5.57649e-06
KRT1	2.22922	1.15654	0.00957632	0.0722718
AC112907.2	2.22522	1.15395	1.3755e-12	2.5952e-09
EPHX3	2.21415	1.14675	0.0013842	0.0176898
CYP2T1P	2.20563	1.14119	1.62028e-06	0.000111359
SOX21.AS1	2.1823	1.12585	3.99574e-06	0.000219793
LGALS7B	2.169	1.11703	0.0235717	0.134537
GLB1L2	2.16266	1.11281	6.6763e-07	5.69972e-05
CGREF1	2.15861	1.1101	2.56375e-06	0.000156541
TMEM63C	2.1528	1.10622	5.54041e-08	8.88381e-06
HMGN2P15	2.15203	1.1057	7.36244e-08	1.10832e-05
CYP2B7P	2.14382	1.10018	0.000128726	0.00303843
LINC01006	2.13602	1.09493	2.94918e-12	4.63692e-09
XK	2.13595	1.09488	2.88991e-10	1.5661e-07
AL049874.3	2.13115	1.09163	5.66369e-08	9.03031e-06
CYP2S1	2.13065	1.09129	0.000643294	0.0101341
C19orf57	2.12728	1.08901	5.75918e-10	2.78616e-07
ABO	2.12545	1.08777	0.000264747	0.00521758
RAP2CP1	2.12278	1.08595	1.62295e-14	7.06633e-11
VILL	2.12098	1.08473	5.15461e-08	8.40811e-06
ABCA17P	2.11686	1.08193	2.69044e-09	9.06454e-07
HS3ST6	2.11318	1.07942	9.2167e-05	0.00236699
AC006329.1	2.11114	1.07802	3.06407e-09	9.63514e-07
AL121761.1	2.10889	1.07648	6.37096e-08	9.8797e-06
VTCN1	2.10633	1.07473	0.00126174	0.0165279
RPP25	2.10374	1.07296	1.14109e-20	3.2294e-16
PPM1N	2.10372	1.07294	8.1248e-12	9.43772e-09
DMRT2	2.10089	1.071	5.01562e-06	0.000260453
EYA2	2.0826	1.05839	0.000128051	0.00303134
GCK	2.08188	1.05789	3.34356e-08	6.00801e-06
CYP4F26P	2.07745	1.05482	8.55557e-08	1.2198e-05
AC016876.1	2.07175	1.05085	3.75281e-12	5.44658e-09
AKR1E2	2.07151	1.05068	1.23619e-10	8.43023e-08
NKX2.3	2.0674	1.04782	2.02271e-09	7.15559e-07
FAM83C	2.06022	1.0428	0.00776438	0.0621528
IL17RB	2.05977	1.04248	2.43109e-08	4.71248e-06
MFSD4A	2.05944	1.04226	8.0064e-05	0.00213662
GALNT14	2.05902	1.04195	5.00447e-05	0.00149954
UNC5B.AS1	2.04891	1.03485	3.39324e-05	0.00111795
MBOAT1	2.04127	1.02947	4.28191e-08	7.27823e-06
AC103957.2	2.02573	1.01845	9.63775e-11	6.90526e-08
SOX30	2.02511	1.018	5.53382e-09	1.52051e-06
AC005392.2	2.025	1.01792	5.68811e-05	0.00164432
IGF2BP2	2.02317	1.01662	0.00016819	0.00371291
C2CD4B	2.02055	1.01475	4.3397e-08	7.35437e-06
IL1RL2	2.0197	1.01414	4.68496e-09	1.33967e-06
PAX9	2.01793	1.01288	4.56174e-06	0.000241312
MUC4	2.01079	1.00777	0.00470289	0.0433892
RF00096.18	2.00957	1.00689	7.7519e-08	1.13086e-05
KRT15	2.00808	1.00582	0.0200705	0.120751
AC087612.1	2.00462	1.00333	0.000444684	0.00765511
LINC01305	2.00406	1.00293	3.76846e-05	0.00120851
HSD11B2	2.00236	1.0017	1.63109e-07	1.98846e-05
AGR2	2.00187	1.00135	0.0317698	0.163789
EPCAM	1.9923	0.994434	0.000180663	0.00390238
LGALS7	1.99184	0.994102	0.0355047	0.176697
NYNRIN	1.99149	0.99385	6.67566e-06	0.00032158
AL079303.1	1.99127	0.993687	1.5849e-08	3.39981e-06
STAG3	1.9905	0.993134	1.72651e-05	0.000674422
FAM84A	1.98808	0.991376	8.2822e-05	0.00219023
AC124798.1	1.97962	0.985221	2.70901e-10	1.4887e-07
ZYG11A	1.97435	0.981375	1.36587e-09	5.33178e-07
TMEM246	1.97096	0.978899	4.99515e-06	0.000259628
ANKLE1	1.96897	0.977438	4.65369e-11	3.99103e-08
H19	1.96866	0.977215	0.0188101	0.115627
MYB	1.96865	0.97721	1.55394e-07	1.93147e-05
ZNF444P1	1.96861	0.97718	5.61814e-08	8.98299e-06
FAM3D	1.96609	0.975326	0.00587711	0.0511621
GIPC2	1.9644	0.974092	2.70612e-05	0.000946672
KRT7	1.96368	0.973562	0.0338082	0.170797
GCLC	1.96315	0.973173	1.99697e-06	0.000129624
WFDC21P	1.96128	0.971799	0.00176444	0.0211816
SERPINB2	1.95481	0.967027	0.00586736	0.0510929
SCNN1A	1.9507	0.963995	0.000116799	0.00282887
SORD	1.94919	0.962874	2.5849e-12	4.18029e-09
C11orf53	1.9413	0.957025	0.00101796	0.01415
MACROD1	1.94056	0.956471	1.37214e-13	4.08767e-10
ATG9B	1.93966	0.955807	5.44834e-08	8.78595e-06
RDH10	1.93908	0.955371	5.00733e-05	0.0014996
DEGS2	1.9355	0.952704	0.000468224	0.00794437
HES6	1.93524	0.95251	5.83539e-05	0.0016745
SLC16A8	1.93499	0.952328	1.20296e-09	4.89856e-07
AC131157.1	1.93477	0.952162	8.61388e-06	0.000390675
NES	1.93258	0.95053	2.87875e-06	0.000170979
CTCFL	1.92744	0.946683	0.00173741	0.0209816
ELFN1.AS1	1.92721	0.946516	0.000141926	0.00327623
MLF1	1.92704	0.946386	4.73523e-07	4.40828e-05
ZBTB7C	1.92643	0.945932	9.69983e-05	0.00245651
CYP4F3	1.92525	0.945045	0.00102945	0.0142642
APOBEC3B	1.92469	0.944624	9.05599e-05	0.0023331
LRRC4	1.92103	0.941883	0.000797667	0.011849
TNNC2	1.92084	0.941737	0.0001855	0.00397866
SYCE2	1.91527	0.93755	8.459e-09	2.09998e-06
SIX1	1.91083	0.934203	9.01172e-05	0.00232383
RFPL1S	1.90955	0.933235	4.13066e-10	2.10634e-07
HMX2	1.90359	0.928721	1.48995e-06	0.000104374
ZNF239	1.90338	0.928563	2.65991e-08	5.03532e-06
AC099568.2	1.90318	0.928411	1.25822e-08	2.8261e-06
SERTAD4	1.90001	0.926003	1.45567e-05	0.000590215
AC008763.1	1.89832	0.924726	6.78414e-10	3.14751e-07
AP000251.1	1.89759	0.924166	2.89349e-09	9.52193e-07
CNNM1	1.89717	0.923848	4.81682e-09	1.34971e-06
NHLRC1	1.89488	0.922106	6.81781e-09	1.80328e-06
MYC	1.89312	0.920763	6.74342e-05	0.00187932
FUT6	1.8916	0.91961	0.00124767	0.0164005
RAPGEFL1	1.89132	0.919397	7.22999e-05	0.00197984
LY6K	1.89075	0.918962	8.44046e-07	6.75738e-05
BMP3	1.8889	0.917546	0.000116024	0.00282096
CES3	1.88876	0.917436	1.17952e-05	0.000495691
CLDN3	1.88725	0.916288	0.0431656	0.201191
TLX2	1.88711	0.916181	1.79315e-10	1.10321e-07
TRIM54	1.88654	0.915745	0.00118251	0.0158009
KRT23	1.88503	0.914589	0.00615418	0.0527706
PRDM13	1.88347	0.91339	2.23447e-10	1.31745e-07
BNIPL	1.88332	0.913281	0.00285861	0.0303172
PCP2	1.88292	0.912971	1.0924e-07	1.4757e-05
COX6A2	1.8814	0.911809	6.33026e-08	9.84355e-06
BIK	1.88027	0.910939	9.30739e-06	0.000416127
MESP2	1.87947	0.91033	3.41417e-06	0.000195289
MAJIN	1.87846	0.909554	1.48941e-07	1.89022e-05
SLC16A9	1.87784	0.909077	0.000146961	0.00335685
CYP4B1	1.87555	0.907311	0.00969807	0.0728176
CDH26	1.87549	0.907266	8.8419e-05	0.00229723
RAET1L	1.87357	0.905794	0.00110755	0.0150074
LHX6	1.87348	0.905722	2.16245e-13	6.11996e-10
PCSK9	1.87187	0.90448	0.000659272	0.0103169
NUDT8	1.87125	0.904	8.73801e-12	9.69782e-09
BARX2	1.86864	0.901987	0.0053936	0.0478809
AC022144.1	1.86853	0.901907	2.17653e-09	7.55804e-07
CMBL	1.86779	0.901332	5.38728e-05	0.00158135
NEBL	1.86691	0.90065	7.01552e-06	0.000333691
SSTR5	1.86647	0.900309	1.39835e-05	0.00057313
CYP2J2	1.86513	0.899279	2.63077e-07	2.82555e-05
FOXD1	1.8567	0.892741	8.97265e-05	0.00231798
PFN2	1.85407	0.890697	0.000536584	0.0088199
TBC1D30	1.85308	0.889927	2.72188e-13	7.33637e-10
FOXA1	1.8511	0.888383	0.00022304	0.00457079
HOOK1	1.84958	0.887201	2.41135e-10	1.37866e-07
KLK11	1.84816	0.88609	0.0226341	0.130675
BMP8B	1.84505	0.883658	3.27598e-12	5.01154e-09
ANKRD13B	1.84463	0.883332	5.15902e-10	2.5615e-07
LINC00392	1.83936	0.879207	0.00153614	0.0191559
GBX1	1.83725	0.877546	0.000244813	0.00491904
PRR15L	1.83101	0.872643	0.00843859	0.0660364
MRLN	1.82977	0.871665	0.0001712	0.00375893
RIBC2	1.82627	0.868901	1.32456e-07	1.72654e-05
AC099518.6	1.82452	0.86752	2.7984e-07	2.97176e-05
PLS1	1.82216	0.865651	3.57419e-05	0.00116505
HSPB6	1.82043	0.864283	0.000180213	0.00389917
DLL3	1.82022	0.86411	3.53499e-07	3.52888e-05
DHRS4.AS1	1.8185	0.862747	1.25472e-12	2.53642e-09
ITGA2B	1.81721	0.861727	1.8363e-07	2.17444e-05
ERN2	1.81708	0.861624	0.0150454	0.0990808
RINL	1.81676	0.861365	1.03823e-11	1.10879e-08
HSPA2	1.81607	0.860817	0.000760726	0.0114153
TCF15	1.81557	0.86042	5.94095e-05	0.00170005
ALDH3A1	1.81222	0.85776	0.012822	0.0884306
MUC20P1	1.81199	0.857572	0.000759018	0.0114048
AC007785.1	1.81134	0.857057	4.10506e-05	0.0012923
PRSS12	1.80906	0.855242	0.000583762	0.00938963
AC005696.1	1.80699	0.853586	6.75747e-11	5.54328e-08
DUOX1	1.80664	0.853306	1.42574e-05	0.000580154
LINC01389	1.80616	0.852929	3.06698e-07	3.18527e-05
FUT3	1.80588	0.852704	0.00103985	0.014366
MUC20	1.80508	0.852065	0.00490035	0.0446866
CEBPA	1.805	0.851996	2.32607e-05	0.000841278
MYCL	1.79928	0.847421	2.97162e-05	0.00101386
HENMT1	1.79762	0.846091	4.64233e-10	2.34612e-07
TPRXL	1.79723	0.845772	0.00018887	0.00402804
CCDC177	1.7961	0.844866	4.60702e-09	1.33727e-06
SLC6A11	1.79437	0.843481	9.4715e-05	0.0024138
FZD9	1.79183	0.841433	1.64118e-06	0.000112056
PLCE1	1.7912	0.84093	5.93e-08	9.3757e-06
PPP1R3D	1.78655	0.837174	9.59935e-11	6.90526e-08
KCNG3	1.78036	0.832172	1.92036e-11	1.84231e-08
GATM	1.77872	0.830838	0.000208712	0.0043432
ELF3	1.77815	0.830379	1.11328e-05	0.000475578
BX284668.5	1.77612	0.828726	6.24238e-06	0.000306179
GRIN2C	1.77586	0.82852	1.18904e-10	8.30736e-08
TNNT3	1.77585	0.828513	0.00104747	0.014419
ERVMER34.1	1.77415	0.827128	3.40387e-05	0.0011208
RF00019.430	1.77332	0.826456	9.96167e-08	1.3719e-05
ALDH1A1	1.77242	0.825717	0.0291637	0.154794
C17orf113	1.77121	0.824734	5.25273e-11	4.37228e-08
LIPE	1.76678	0.821123	2.49242e-10	1.39679e-07
SLFN13	1.76654	0.820924	0.000421461	0.00733339
RAB40B	1.76563	0.820186	1.2539e-09	4.99813e-07
NPW	1.7656	0.820162	0.00415313	0.0397423
PRRT3.AS1	1.76263	0.817727	1.33356e-08	2.96008e-06
BCAS1	1.76108	0.816462	0.00101653	0.0141402
ATP2A1.AS1	1.76014	0.815688	2.02042e-08	4.11367e-06
AL109918.1	1.75685	0.812994	0.000143755	0.00330095
AMN	1.75591	0.812223	3.21435e-06	0.000186305
GEMIN8P4	1.7536	0.810319	7.62158e-12	9.37819e-09
GRHL3	1.75191	0.808925	0.00510537	0.0460664
COA7	1.75081	0.808025	5.23628e-18	7.40959e-14
EIF4EBP3	1.7503	0.807602	1.42822e-07	1.83155e-05
LINC01269	1.74874	0.806313	0.000160449	0.00357407
CELSR3	1.74432	0.802666	5.89603e-07	5.19824e-05
IRX5	1.74314	0.801692	0.000186827	0.00399351
AKAP1	1.74079	0.799745	8.53074e-11	6.52509e-08
FOXD3.AS1	1.7404	0.799422	0.000117118	0.00283211
TMPRSS4	1.7385	0.797844	0.00106657	0.0145962
SPTSSB	1.73664	0.796298	0.00320553	0.0329172
IL12RB2	1.73605	0.79581	0.000333096	0.00617351
KCNS3	1.73595	0.795721	5.71084e-05	0.00164837
AL161669.2	1.7326	0.792939	0.00043856	0.00757733
LINC02001	1.73188	0.792339	1.2035e-10	8.30736e-08
GPD1L	1.72988	0.790672	8.61942e-09	2.1212e-06
FOXA3	1.72936	0.79024	0.00973239	0.0729549
CCNI2	1.72821	0.789281	0.000114406	0.00279362
DNM1	1.72742	0.788623	7.51896e-05	0.00204217
C20orf27	1.72677	0.788077	4.18615e-12	5.77914e-09
AC120498.4	1.72581	0.78727	0.000734341	0.0111465
WNT2B	1.72574	0.787211	6.56738e-05	0.00184571
AC006262.4	1.72473	0.786368	1.31012e-05	0.000541674
BX284668.4	1.72297	0.784899	3.44884e-07	3.47029e-05
SDR16C5	1.7229	0.784837	0.00316888	0.0326415
MGST1	1.72103	0.783272	0.0171011	0.108481
KRTCAP3	1.71933	0.781847	2.26881e-07	2.548e-05
RPL35AP28	1.71916	0.7817	6.10597e-05	0.00174287
NMB	1.71905	0.781608	5.73601e-06	0.000286802
JPH1	1.71828	0.780966	3.69633e-06	0.000207353
FOXE3	1.71676	0.779688	2.58406e-06	0.000157611
AC025183.1	1.71581	0.778888	0.00160641	0.0198528
AC007114.1	1.71423	0.77756	8.50024e-08	1.21498e-05
PRSS3P4	1.71385	0.777239	7.05644e-06	0.000334794
KIAA1211L	1.71379	0.777188	2.12016e-05	0.000787048
AC115284.2	1.71246	0.776074	4.41775e-11	3.84698e-08
LINC01133	1.71198	0.775664	0.00647219	0.0546529
POLE2	1.7102	0.774162	4.49385e-16	3.63373e-12
SEPT3	1.71018	0.774151	8.90239e-05	0.00230404
MOV10L1	1.70994	0.773948	6.04775e-06	0.00029909
TRIM31	1.7095	0.773574	0.0126397	0.0875255
ADGRD2	1.70748	0.771869	2.43784e-09	8.31245e-07
GSTA4	1.70729	0.771711	0.00157524	0.019553
CECR7	1.70626	0.770834	1.33262e-06	9.60878e-05
PSCA	1.70607	0.770679	0.0400033	0.191255
KIAA1324	1.70529	0.77002	0.0281758	0.151612
HMGA1	1.70456	0.769402	1.45692e-11	1.44675e-08
KRT19	1.70341	0.768426	0.00200487	0.0233498
CDKN2C	1.70236	0.767538	3.45012e-05	0.00113247
RAMP2.AS1	1.70149	0.7668	3.06227e-08	5.62497e-06
RPL21P13	1.70116	0.76652	2.22705e-06	0.000141159
AC111149.2	1.70104	0.766419	4.5743e-05	0.00140257
DHRS9	1.70038	0.765857	0.0008222	0.0121036
CHST6	1.69999	0.765526	0.00206627	0.0238635
GALNT5	1.69977	0.765341	0.00341962	0.0344899
TLX3	1.69556	0.761764	0.00230618	0.0258689
TTC39A	1.69546	0.761678	6.52353e-05	0.00183613
TACR2	1.69444	0.760806	1.6182e-09	5.94761e-07
ARHGAP4	1.69425	0.760648	7.03303e-06	0.000334243
ALCAM	1.69298	0.759564	0.00109147	0.0148687
RNA5SP71	1.69107	0.757939	0.000744709	0.0112465
HOXD13	1.6905	0.757447	0.00579834	0.0506321
AKR1C1	1.68894	0.756117	0.0130597	0.0895684
PAX7	1.68726	0.754683	0.0046628	0.0431883
TINCR	1.68666	0.754168	0.00917534	0.070134
PIR	1.68641	0.753954	0.000190409	0.00404409
ABCA3	1.68616	0.753745	0.0011397	0.0153265
NKPD1	1.68555	0.753223	2.41026e-10	1.37866e-07
LIPH	1.6839	0.75181	0.0019636	0.022992
LDHC	1.6833	0.751293	1.15039e-06	8.61304e-05
PROCR	1.68307	0.751099	8.44445e-05	0.002219
CDH16	1.68201	0.750187	0.0206265	0.122921
RAB15	1.68018	0.748615	1.57116e-05	0.000629375
KHK	1.67878	0.74741	1.98983e-08	4.07245e-06
NDRG2	1.67826	0.746969	0.000122473	0.00293117
LINC02560	1.6778	0.746571	0.00161119	0.0199001
PRR15	1.67739	0.746218	0.0207676	0.123593
RNU6.1161P	1.67697	0.745861	0.0001733	0.00379023
LDHD	1.67415	0.743432	6.74002e-05	0.00187932
SUSD4	1.67402	0.743319	0.00697613	0.0576021
PTPRZ1	1.67197	0.741551	0.0120699	0.0846776
LRRC8D	1.67139	0.741045	8.31175e-10	3.73382e-07
AC131235.2	1.66855	0.738598	2.46835e-10	1.39679e-07
MYRF	1.66832	0.738393	0.00279259	0.0297845
GPR150	1.66669	0.736989	1.81287e-11	1.76918e-08
C6orf141	1.6651	0.735608	0.000642427	0.0101286
ARHGEF33	1.66472	0.735283	3.54928e-13	8.73462e-10
SAPCD2	1.66471	0.735272	1.62932e-07	1.98846e-05
ACOT2	1.66468	0.735245	5.79507e-08	9.21383e-06
PYY2	1.66443	0.73503	0.00994624	0.074115
AL022323.1	1.6639	0.734568	3.64595e-06	0.000205342
AL691482.3	1.66354	0.734252	0.00174434	0.0210339
SIX4	1.66333	0.734075	0.000162854	0.00361911
CDCA7	1.66302	0.733808	2.33937e-07	2.60656e-05
TRIM2	1.66241	0.733272	0.00193509	0.0227666
TMEM14A	1.66166	0.732628	3.66405e-09	1.13329e-06
AL121790.2	1.65855	0.729922	4.98037e-05	0.00149548
AC037487.3	1.65752	0.729023	1.19536e-05	0.000500659
UGT8	1.65692	0.728505	0.019236	0.11742
CNTD2	1.6564	0.728052	4.98432e-05	0.00149588
NPIPB15	1.65628	0.727947	0.00052535	0.00867693
C14orf39	1.65596	0.727669	6.25096e-07	5.42664e-05
SLC8A2	1.65564	0.727393	0.000343016	0.00629349
OTX1	1.65543	0.727202	3.27576e-08	5.92378e-06
MCIDAS	1.65411	0.726052	1.27911e-06	9.31889e-05
MAP3K21	1.65298	0.725066	5.67605e-09	1.55206e-06
AC108860.2	1.65171	0.723963	8.1386e-09	2.04738e-06
SLC12A9.AS1	1.65075	0.72312	4.71787e-09	1.33967e-06
FAM83D	1.64994	0.72241	1.39314e-06	9.84453e-05
MIR621	1.64911	0.721689	3.94507e-05	0.00125238
SHCBP1L	1.6487	0.721332	6.45757e-05	0.001823
AC083841.1	1.64729	0.720095	0.000777041	0.0115986
AC073585.1	1.6468	0.719668	1.01587e-08	2.41113e-06
ABCC5	1.64654	0.719442	0.000271153	0.00530515
KLF5	1.6465	0.719405	1.65989e-05	0.000656095
SNHG10	1.64641	0.719321	4.01407e-12	5.6801e-09
NPBWR1	1.64637	0.719286	0.000493588	0.00825106
CIART	1.64609	0.719043	4.12823e-06	0.000224463
AL161431.1	1.64569	0.718689	0.0285162	0.152717
MSMB	1.64563	0.718643	0.0315125	0.162952
AC099850.1	1.64535	0.718392	8.82834e-18	9.99404e-14
ZBTB12	1.64378	0.717019	3.28237e-07	3.34754e-05
FGFBP3	1.64309	0.716413	8.8331e-11	6.66628e-08
SLC39A2	1.64306	0.716381	0.0185807	0.114727
AC145343.1	1.64214	0.715581	7.66885e-09	1.95528e-06
LINC02321	1.64206	0.715508	1.69149e-05	0.000664872
PEG10	1.64189	0.715358	0.032114	0.165058
SNX18P7	1.64047	0.714105	1.39033e-06	9.84453e-05
RYR1	1.63878	0.71262	0.00064886	0.010199
GAL3ST2	1.63858	0.712445	0.000176564	0.00383642
NUPR2	1.63838	0.712272	0.010655	0.0778545
DNMT3B	1.63831	0.712206	4.95039e-06	0.000258013
DMC1	1.63736	0.711375	1.5524e-07	1.93147e-05
AZGP1	1.63515	0.709426	0.0159181	0.102877
COQ8A	1.63486	0.709165	1.82392e-09	6.53404e-07
CMTM8	1.63405	0.708452	0.000438912	0.00757881
DCST1.AS1	1.63374	0.708183	3.38679e-07	3.4232e-05
REC8	1.63247	0.707057	0.00233526	0.026107
GOLGA8A	1.63246	0.707049	6.64763e-06	0.000320502
MARS2	1.63217	0.706791	1.7363e-09	6.25976e-07
AL450998.2	1.63153	0.70623	1.30384e-08	2.9055e-06
LZTS3	1.63107	0.70582	0.000571314	0.00924193
TMSB15A	1.63062	0.705417	0.0169383	0.107709
RPIA	1.63055	0.705362	2.13348e-12	3.65936e-09
ULBP1	1.63031	0.705146	3.62402e-05	0.00117618
AL162595.1	1.63006	0.704925	2.47223e-08	4.77587e-06
SLC25A21.AS1	1.63006	0.704921	4.70206e-08	7.82782e-06
CEBPA.DT	1.62979	0.70469	4.9046e-07	4.52586e-05
CYP4F29P	1.62964	0.704552	0.0106062	0.0776223
AGMAT	1.62959	0.704509	2.21005e-07	2.49688e-05
SPDYC	1.62858	0.703612	0.00170967	0.0207307
GLYATL2	1.6283	0.70337	0.0231489	0.13282
SLC10A6	1.62743	0.702595	0.0162485	0.104404
TSPAN1	1.6274	0.702567	0.0443493	0.204819
FOXD2.AS1	1.62687	0.702103	8.51441e-10	3.77391e-07
CDH24	1.62651	0.701776	4.14344e-09	1.22789e-06
TSPAN12	1.62647	0.701743	0.00198477	0.0231776
CNKSR3	1.62614	0.701451	1.63193e-07	1.98846e-05
STEAP3	1.62436	0.699875	6.81122e-09	1.80328e-06
E2F2	1.62408	0.699626	8.89547e-07	7.06173e-05
AC098934.1	1.62205	0.697818	0.000161508	0.00359484
NXPH4	1.62084	0.696745	0.00971923	0.0729033
HAP1	1.61811	0.694314	0.00161129	0.0199001
C2CD4D.AS1	1.61766	0.693911	0.00104491	0.0143967
LINC02004	1.61702	0.693335	2.20137e-05	0.000809103
PPFIA3	1.61603	0.692458	1.89818e-06	0.000124856
ICK	1.61579	0.692242	5.91478e-07	5.19858e-05
ZCWPW1	1.61514	0.691658	1.81143e-07	2.14949e-05
ACSS1	1.61476	0.691323	0.000116442	0.00282465
ACTL8	1.61453	0.691113	0.00254209	0.027767
CARMIL1	1.61418	0.690803	1.24824e-06	9.16914e-05
TMEM38B	1.61376	0.690422	7.51921e-08	1.11326e-05
FBXL16	1.61244	0.68925	0.000237558	0.00480962
RNU4.1	1.61142	0.68833	0.00044489	0.00765632
ASIC1	1.61138	0.688297	5.30822e-06	0.000272399
E2F8	1.61092	0.687885	1.92167e-06	0.000126037
MACC1	1.61056	0.687567	0.000124553	0.00296711
GRAMD1C	1.60961	0.686715	7.62679e-07	6.28018e-05
FAM216A	1.60935	0.686476	3.53651e-10	1.83645e-07
CHDH	1.60918	0.686325	2.67638e-05	0.000938009
IQANK1	1.60894	0.686112	2.01596e-05	0.000760208
LTBP4	1.60841	0.685633	4.97302e-06	0.000258744
XYLB	1.60773	0.685024	1.45273e-09	5.49824e-07
INPP5F	1.60699	0.684357	3.41319e-06	0.000195289
MYO5C	1.60668	0.684081	0.000224959	0.00460011
EPHX2	1.60663	0.684035	5.77945e-05	0.00166284
PLPP2	1.60549	0.683014	8.33985e-07	6.68902e-05
NMRAL2P	1.60544	0.68297	0.0113576	0.0810747
MPV17L	1.60488	0.682465	0.00170457	0.0206777
CYP27B1	1.60486	0.682452	1.93507e-06	0.000126477
C19orf33	1.60459	0.682209	0.0282886	0.151901
SH3BGRL2	1.60431	0.681953	0.0034345	0.0345723
MAP7D2	1.60381	0.681503	0.00781689	0.0624227
NQO1	1.60369	0.681391	0.00311673	0.0322452
ASPRV1	1.60302	0.680794	0.000755572	0.0113711
COLCA2	1.60259	0.680402	0.00161973	0.0199668
PHETA2	1.60258	0.680399	9.85524e-09	2.36367e-06
FRAT2	1.60238	0.680216	3.51592e-10	1.83645e-07
SLC35G1	1.60228	0.680126	3.15883e-07	3.25083e-05
LRP8	1.60103	0.679001	1.25059e-06	9.16914e-05
CRNDE	1.60039	0.678424	1.99055e-05	0.000752131
AKR1C3	1.59951	0.677634	0.0441621	0.204338
DOCK9.DT	1.59813	0.676382	1.05391e-05	0.000455717
POU4F1	1.59792	0.676196	5.06604e-06	0.00026235
CALB1	1.59662	0.675024	0.0145459	0.096612
TCEA3	1.59649	0.6749	0.000114783	0.00279679
CYP4F12	1.59619	0.674634	0.00831086	0.0653258
SYTL2	1.59565	0.674147	6.02214e-05	0.00172067
AL031665.2	1.59565	0.674143	1.4281e-08	3.14527e-06
MTHFD1	1.59463	0.673225	1.79943e-14	7.2751e-11
SLC38A1	1.5944	0.673012	3.78003e-07	3.7081e-05
C19orf73	1.59429	0.672915	1.35842e-09	5.33178e-07
LINC02014	1.5928	0.671562	8.54399e-07	6.82567e-05
GPC2	1.59253	0.671317	7.84932e-05	0.00210363
VRK1	1.5924	0.671201	1.079e-12	2.26199e-09
MYEOV	1.59167	0.670543	0.0239117	0.135943
AL928654.2	1.59086	0.669809	2.06212e-05	0.00077094
PLEKHS1	1.58976	0.668807	0.0498588	0.220253
TFAP4	1.58938	0.668465	3.10825e-13	7.99695e-10
GGT7	1.58891	0.668038	0.000134834	0.00314587
GAN	1.58806	0.667266	6.53528e-07	5.6047e-05
MCM8	1.58741	0.666673	1.77377e-07	2.12709e-05
PNLDC1	1.58728	0.666554	0.0173509	0.109486
SERPINB5	1.58718	0.666469	0.0483161	0.216223
IQGAP3	1.587	0.666303	4.86548e-07	4.51469e-05
B3GNT3	1.58667	0.666006	0.0311596	0.161852
SMAGP	1.58549	0.664924	2.49059e-09	8.44146e-07
SP9	1.58468	0.664192	0.000437916	0.00756852
AC009237.14	1.58401	0.663584	7.42476e-07	6.17116e-05
ATP6V1C2	1.58389	0.663474	0.00267733	0.0288103
PPM1L	1.58356	0.663171	0.00015074	0.00342383
FAM24B	1.5834	0.663028	6.80502e-08	1.04102e-05
DLK2	1.58307	0.662724	0.00318175	0.0327443
ANKRD18B	1.58289	0.66256	6.42194e-06	0.00031228
SELENOP	1.58172	0.66149	0.0249684	0.139761
MAST2	1.5814	0.661201	9.34774e-10	3.9782e-07
ILF3.DT	1.58114	0.660967	2.18715e-08	4.37446e-06
ORC1	1.58081	0.660662	8.20821e-12	9.43772e-09
MCCC1	1.58067	0.660534	1.63068e-08	3.46992e-06
GALNT12	1.57996	0.659887	0.00360138	0.0359073
CYP26A1	1.57936	0.659337	0.00066992	0.0104488
GABRE	1.57934	0.659326	0.00722106	0.0589943
FAM98C	1.57912	0.659121	2.03539e-12	3.60023e-09
ASRGL1	1.57817	0.658248	0.0171812	0.108774
TRIM7	1.57677	0.656975	0.00042698	0.00740892
RF00100	1.5764	0.656629	0.00510789	0.0460817
AL603750.1	1.57624	0.656488	1.3177e-05	0.000543616
KCNJ11	1.57544	0.655755	3.98603e-05	0.00126043
GAREM1	1.5754	0.655714	5.01091e-07	4.61183e-05
DIPK2A	1.57526	0.655585	7.84058e-05	0.00210229
AL390719.2	1.57522	0.655555	0.000653024	0.0102473
AC091271.1	1.57518	0.655518	3.12637e-08	5.69e-06
PRMT6	1.57447	0.654869	2.08678e-07	2.38137e-05
C17orf58	1.57426	0.654675	3.49803e-11	3.14279e-08
S100A14	1.57356	0.654037	0.00683708	0.0568243
CAMKK1	1.57203	0.652625	3.09979e-06	0.000181068
MAGI3	1.57192	0.652526	4.35768e-07	4.12463e-05
AC005696.4	1.57189	0.652499	2.828e-07	2.98639e-05
NCR3LG1	1.5712	0.651871	2.84932e-08	5.32761e-06
NUF2	1.57062	0.651338	3.84526e-09	1.1639e-06
AC015660.2	1.57043	0.651157	4.25948e-05	0.00132689
YDJC	1.57039	0.651122	6.07824e-14	2.15025e-10
AL031847.1	1.57034	0.651073	5.52279e-06	0.000279857
SBK1	1.56982	0.650598	0.00721523	0.0589572
NAT8B	1.56871	0.649582	0.000314272	0.00590781
AC144652.1	1.56866	0.649536	9.15524e-08	1.28587e-05
ZNF488	1.56864	0.64951	0.00076594	0.0114692
TYMSOS	1.56857	0.649449	2.00242e-06	0.000129625
AC092651.2	1.56716	0.64815	2.59811e-05	0.000915111
XXYLT1	1.56703	0.64803	4.60022e-08	7.7036e-06
CKB	1.56687	0.647886	0.00177501	0.0212633
HLTF	1.56593	0.647019	2.20539e-06	0.0001401
PIGW	1.5659	0.646994	4.66839e-12	6.14513e-09
TMEM238	1.5659	0.646992	0.000100549	0.00252945
TPD52L1	1.56569	0.646797	0.000199005	0.00418895
AL391244.1	1.5654	0.646527	2.29413e-06	0.000144602
PCNA	1.56539	0.64652	1.30202e-10	8.77347e-08
ENHO	1.56481	0.64599	0.00110065	0.0149651
B4GALT4	1.56473	0.645911	1.50319e-05	0.000605202
NOS2	1.56393	0.645175	0.0135859	0.0920337
FNDC10	1.56373	0.644991	0.000210697	0.00437165
PLAC1	1.56353	0.644805	0.000852253	0.0124254
SP2.AS1	1.56327	0.644565	8.21413e-12	9.43772e-09
KIF15	1.56263	0.643981	3.61309e-07	3.59417e-05
AP005233.2	1.56232	0.643694	0.0184118	0.114017
HMGCS1	1.56162	0.643041	3.52583e-05	0.00115291
SLC4A11	1.56061	0.642109	0.000850355	0.0124179
ACTL6A	1.56052	0.642026	1.09116e-08	2.54165e-06
ROBO3	1.55976	0.641323	2.25106e-05	0.0008215
CKMT1B	1.55895	0.640571	6.94931e-05	0.00192439
PRRT4	1.55875	0.640391	0.000138525	0.00320817
SLC52A1	1.55831	0.639983	0.00267894	0.0288222
LLGL2	1.55751	0.639243	2.53672e-05	0.000899082
AC007906.2	1.55694	0.638712	0.037109	0.181731
TRNP1	1.55683	0.638613	0.00699966	0.0577628
ASB13	1.55653	0.638332	1.36608e-10	8.99103e-08
ATP13A5	1.55616	0.637988	2.3046e-05	0.000836722
PAXIP1.AS1	1.55508	0.636987	7.74352e-07	6.35216e-05
TFAP2C	1.55508	0.636985	2.9627e-05	0.00101151
AL359513.1	1.55487	0.63679	7.91532e-07	6.45566e-05
AKR7L	1.55483	0.63676	4.19786e-07	4.00686e-05
FAM131C	1.55456	0.636507	6.96386e-05	0.00192721
TMEM30B	1.55415	0.636126	2.11528e-06	0.000135135
ELOVL6	1.55406	0.636045	2.36572e-05	0.000852351
ZNF57	1.55381	0.635807	4.10617e-09	1.22325e-06
KHDC1	1.55312	0.635165	1.72694e-08	3.66099e-06
AC015912.3	1.5529	0.634968	8.03295e-06	0.00036996
PAFAH1B3	1.55258	0.634666	3.5697e-08	6.33393e-06
TMEM97	1.55248	0.634573	3.36949e-06	0.000193232
DGUOK.AS1	1.55183	0.633973	2.32063e-05	0.000840924
KRT10	1.55177	0.633918	0.00765996	0.0615603
SORD2P	1.55142	0.633587	2.76423e-06	0.000165567
BTNL9	1.55138	0.633551	0.00144872	0.0183112
KIF16B	1.55138	0.63355	2.83017e-06	0.000168624
GCHFR	1.55125	0.633434	7.02097e-05	0.00193799
TMEM171	1.55076	0.632974	0.000854919	0.0124514
FAAH	1.55052	0.632754	0.000356459	0.00648129
DUOXA1	1.55035	0.632592	0.00784389	0.0625852
AC010168.1	1.54982	0.632104	5.21281e-05	0.00154399
CMAHP	1.54982	0.632098	0.00590843	0.0513479
AC093702.1	1.54963	0.63192	0.000470904	0.00798505
AL022322.1	1.54959	0.631891	2.46229e-05	0.000880381
KLHL13	1.54947	0.631779	0.000385471	0.00686979
HMGB2	1.54903	0.631361	1.20716e-07	1.59644e-05
PPARGC1B	1.54898	0.631319	2.96504e-07	3.10791e-05
FOXD2	1.54897	0.631311	4.01992e-09	1.20389e-06
CKMT1A	1.54855	0.630914	5.68212e-05	0.00164432
PTGER1	1.54834	0.630726	4.75357e-05	0.00144037
ANO1	1.54782	0.630239	0.00997092	0.0742695
AC008649.1	1.54768	0.630112	0.000319467	0.00599154
ACTL10	1.54748	0.629924	1.11482e-07	1.49927e-05
FUT2	1.54706	0.629527	0.00404519	0.0390152
FAM111B	1.54608	0.628618	1.35934e-06	9.67817e-05
AC100793.4	1.54606	0.628598	4.59163e-06	0.00024224
CLGN	1.54529	0.627877	0.0140245	0.0940649
NRTN	1.54521	0.627807	0.000694801	0.0107258
IGFBPL1	1.54515	0.627748	0.00493659	0.0449157
KIF2C	1.54483	0.627448	9.0402e-12	9.84026e-09
MAN1B1.DT	1.5448	0.62742	7.68002e-10	3.47764e-07
MGME1	1.54474	0.627363	4.00033e-11	3.53792e-08
CHRNB4	1.54445	0.627095	0.000229893	0.0046824
CES2	1.54377	0.62646	6.28635e-05	0.00178266
TXNDC16	1.54293	0.625669	6.79008e-07	5.77076e-05
IL20RA	1.54267	0.625428	0.000808457	0.0119579
TMEM147.AS1	1.54239	0.625164	1.90051e-08	3.96947e-06
PER3	1.54227	0.625055	0.000737304	0.0111765
WDHD1	1.54207	0.624864	1.14849e-09	4.74501e-07
AL391427.1	1.54204	0.624841	6.91817e-05	0.00191764
NPM2	1.54191	0.624723	0.000535936	0.00881783
GPR160	1.54151	0.624347	0.0039823	0.0386366
C3orf70	1.54143	0.624272	0.000202836	0.00425061
CAMK1D	1.54076	0.623644	0.000480598	0.00808885
FAM155B	1.54073	0.623613	0.00044699	0.00767847
TTC32	1.54022	0.623138	4.50938e-09	1.31567e-06
LINC00634	1.53979	0.622735	1.21828e-11	1.25377e-08
HIST1H2AJ	1.53935	0.622318	3.84274e-06	0.000213451
KIAA1257	1.53934	0.622313	2.70891e-07	2.89848e-05
TM4SF1.AS1	1.53921	0.622188	1.27092e-05	0.000526238
NOP56	1.53826	0.621301	1.1096e-11	1.16306e-08
GSTA9P	1.53807	0.621117	0.00200209	0.0233222
AC009065.2	1.53796	0.621013	0.012812	0.0883833
AC009005.1	1.5378	0.620872	0.00311914	0.0322583
METTL7A	1.53771	0.620781	0.0113159	0.0808921
THEM5	1.53754	0.62062	0.00133473	0.0172721
NRIP3	1.53636	0.619515	0.000953181	0.0134779
PTPRH	1.53627	0.619433	0.00991646	0.073971
TSHZ1	1.53607	0.619247	4.31686e-06	0.000231824
TTLL12	1.53548	0.618693	5.71168e-07	5.09625e-05
ACVR2A	1.53547	0.618684	2.04273e-08	4.12938e-06
B3GNT5	1.53534	0.618555	0.000345303	0.00632314
STK26	1.53525	0.618474	2.20638e-05	0.000809892
PLLP	1.53501	0.618249	0.000307704	0.00581525
PDSS1	1.53488	0.618121	5.13343e-11	4.33675e-08
AC097639.1	1.53438	0.617656	4.52971e-05	0.00139002
CYP2C18	1.53405	0.617347	0.0115832	0.0821817
SPTLC2	1.53401	0.617312	3.01616e-09	9.63514e-07
MCU	1.53298	0.616335	5.67979e-07	5.07879e-05
HIST1H3H	1.53291	0.616274	0.000881957	0.0127251
CROCC	1.53216	0.615565	4.3305e-06	0.000232117
DDN	1.53175	0.615177	2.99879e-08	5.56516e-06
CLCN2	1.53066	0.614158	2.36291e-07	2.61733e-05
GINS1	1.5298	0.613344	1.16427e-08	2.65727e-06
TACC2	1.52977	0.61331	0.000123526	0.00294888
CHAC2	1.52963	0.613187	2.58307e-08	4.90627e-06
AK7	1.52946	0.613018	6.2808e-06	0.000307531
RNU6.418P	1.52916	0.612741	0.000546361	0.00893016
BRMS1L	1.52884	0.612433	5.41847e-07	4.93081e-05
AC004812.2	1.52863	0.612244	1.46858e-10	9.33984e-08
ACKR1	1.52836	0.611986	0.0209176	0.124181
TBX6	1.52821	0.611842	0.000687406	0.0106482
FAM81A	1.5282	0.611835	0.000197727	0.00416825
SYBU	1.52746	0.611131	0.00163648	0.020106
CGN	1.52704	0.610735	0.00378598	0.0372361
GFRA3	1.5254	0.609192	0.00943407	0.0714976
NEBL.AS1	1.52538	0.60917	8.14936e-07	6.60845e-05
P2RY1	1.5251	0.608906	0.0290202	0.154278
FAM86HP	1.52481	0.608631	1.59556e-07	1.9601e-05
GRB7	1.52456	0.608392	3.01498e-05	0.00102311
SCARNA13	1.52447	0.608311	1.98433e-07	2.28287e-05
TTC22	1.52414	0.607994	0.000674106	0.0104939
HAUS4	1.52391	0.607776	6.23863e-09	1.68152e-06
RASIP1	1.52375	0.607622	0.00189715	0.0224087
DOC2GP	1.52365	0.607529	9.78899e-08	1.35471e-05
THEM6	1.52359	0.607472	3.05847e-07	3.18227e-05
LINC01564	1.52341	0.607303	0.00069064	0.0106895
TMEM44	1.52301	0.606924	3.68625e-06	0.000206993
CAPN13	1.52193	0.605897	0.0219202	0.127976
TPSP2	1.52173	0.605715	0.00944089	0.0714976
RMI2	1.52165	0.605634	1.71885e-05	0.000672824
SMC6	1.52127	0.605278	1.0046e-08	2.39927e-06
TMEM241	1.5208	0.60483	8.66904e-09	2.12418e-06
KRT7.AS	1.52058	0.604623	0.0285717	0.152865
CARM1	1.51991	0.603984	1.66321e-06	0.000113015
TDRD5	1.51971	0.603801	0.00280212	0.029858
EPN3	1.51965	0.603743	4.57928e-05	0.00140334
CEP85	1.51965	0.603736	1.02604e-06	7.92084e-05
TOP2A	1.51923	0.603344	3.75751e-07	3.69722e-05
CCN3	1.51918	0.603291	0.00871094	0.0676161
MUTYH	1.51898	0.603099	4.2355e-13	9.98907e-10
EPB41L1	1.51828	0.602439	7.0601e-05	0.00194663
VSIG10L	1.51821	0.602374	0.00898555	0.0690845
AL050341.2	1.51784	0.60202	1.72907e-09	6.25976e-07
PCED1A	1.51783	0.60201	4.88062e-09	1.36085e-06
AC016394.1	1.51738	0.601581	6.92051e-09	1.82193e-06
BUB1B	1.51727	0.601479	6.04965e-07	5.29246e-05
GPSM2	1.51642	0.600668	4.36212e-06	0.000233149
PXMP4	1.51624	0.600494	2.68998e-05	0.000942192
SLC51A	1.51589	0.600162	0.000336965	0.0062147
FGF7P3	1.51579	0.60007	0.00139269	0.0177703
AC100801.1	1.51562	0.599907	0.0132882	0.090619
HPSE	1.51531	0.599613	0.000114728	0.00279679
TMEM37	1.51481	0.599137	0.00288799	0.0305259
TOLLIP.AS1	1.51479	0.599115	8.19353e-08	1.18611e-05
EGFL6	1.51448	0.598826	0.00705525	0.058086
SNHG4	1.51402	0.598384	9.58763e-05	0.00243682
ZFP3	1.51381	0.598182	9.41533e-06	0.000419627
IFNLR1	1.51375	0.59813	6.25088e-05	0.00177706
AC004130.1	1.51343	0.597819	4.37581e-07	4.13488e-05
LURAP1L	1.51339	0.597783	0.0125105	0.0869715
SLC39A4	1.51317	0.597578	9.93034e-05	0.0025048
RNU4.2	1.51298	0.597396	0.0190199	0.116537
B4GALT5	1.51277	0.597194	1.41263e-05	0.00057648
FGFR2	1.51232	0.596762	0.0017553	0.0211256
LRRC8B	1.51221	0.596655	3.55956e-07	3.54716e-05
AL132712.2	1.51217	0.596618	0.00029426	0.00563455
SLC1A5	1.51179	0.59626	3.56433e-06	0.000201849
GAREM2	1.51132	0.595808	8.78842e-06	0.000397636
NKX2.4	1.51108	0.595579	2.11308e-05	0.000786354
PPM1H	1.51056	0.595083	0.010438	0.0768486
HIST1H2BO	1.51051	0.595032	0.000445395	0.00766269
NT5DC3	1.51031	0.594849	3.58571e-06	0.000202553
CDCA7L	1.50972	0.594285	1.06936e-05	0.000461145
RAVER2	1.50943	0.594002	5.99568e-08	9.40076e-06
ZSWIM5	1.50938	0.593953	0.000112951	0.00277053
SIPA1L3	1.50915	0.593733	7.43202e-08	1.10887e-05
NDC1	1.5086	0.593206	2.52483e-10	1.40108e-07
ACYP1	1.50849	0.593106	1.41635e-10	9.14563e-08
FOXE1	1.50825	0.592876	0.0421639	0.198203
TFRC	1.5082	0.592826	0.000584312	0.0093958
GDF15	1.50817	0.5928	0.0464085	0.210752
NCBP2.AS2	1.50786	0.592502	1.02043e-09	4.24695e-07
AC008443.4	1.50731	0.591974	3.15903e-05	0.00105929
KIFC1	1.50717	0.591845	6.41993e-09	1.72218e-06
HAUS5	1.50693	0.591613	8.18722e-09	2.0505e-06
DCAF4	1.50688	0.591568	3.15166e-09	9.85582e-07
UHRF1	1.50657	0.59127	2.41064e-07	2.64946e-05
DNA2	1.50607	0.590793	2.39784e-07	2.64566e-05
SLC16A5	1.50548	0.590225	0.000497148	0.00830075
AL136162.1	1.50509	0.589849	1.42189e-10	9.14563e-08
AL109976.1	1.50498	0.589744	1.90145e-06	0.000124856
HIST3H2A	1.50428	0.589071	0.00227562	0.0256073
RGMA	1.504	0.588803	0.00290272	0.0306244
GALC	1.50399	0.588793	4.60857e-07	4.30452e-05
OXCT1	1.50336	0.58819	2.04206e-05	0.000765932
MIR559	1.50328	0.588115	0.00163575	0.0201018
RMND5A	1.50267	0.587532	7.52734e-10	3.43599e-07
UBE2C	1.50224	0.587112	2.30911e-08	4.5225e-06
BSPRY	1.50202	0.586908	0.00352254	0.0352827
CAMK2D	1.50194	0.586824	3.46849e-05	0.00113679
C17orf100	1.50158	0.586482	7.31405e-09	1.89904e-06
DQX1	1.50143	0.586341	0.000780359	0.011639
APC2	1.50139	0.586295	1.94563e-08	4.01303e-06
C12orf56	1.50109	0.586008	0.00107417	0.014686
CCL28	1.50042	0.58537	0.000699789	0.010784
AC080112.1	1.50009	0.585053	1.8755e-06	0.00012387
FBL	1.49996	0.584921	1.28863e-08	2.88296e-06
AMH	1.49991	0.584878	0.0162347	0.104347
BOLA1	1.49957	0.584549	1.23425e-09	4.95467e-07
C1orf226	1.49945	0.584436	0.000551716	0.0089969
GPHN	1.4992	0.584188	1.01748e-09	4.24695e-07
LRIG3	1.49901	0.584006	0.000151443	0.00343703
RNF32	1.49899	0.583995	1.20856e-08	2.73628e-06
SLC35A3	1.49834	0.583367	1.01917e-05	0.000445806
ELOVL3	1.49814	0.583176	0.00489217	0.0446499
BCL6	1.49814	0.583171	8.79916e-06	0.000397804
HCG11	1.49777	0.582816	6.59101e-06	0.000318586
RASL11A	1.49773	0.582777	0.000766961	0.0114815
AL513327.1	1.49773	0.582775	1.11469e-08	2.58528e-06
SLC25A19	1.49725	0.582315	2.91774e-09	9.54623e-07
ESF1	1.49647	0.581561	3.65736e-07	3.62546e-05
SLC29A2	1.49619	0.581297	2.5559e-05	0.000904182
RNF157	1.49602	0.581126	0.00234033	0.0261492
DHDH	1.49569	0.580816	0.000502702	0.00838114
ATP23	1.49551	0.580638	6.56657e-09	1.75321e-06
LINC01003	1.49475	0.579906	6.12966e-08	9.58427e-06
RPP40	1.4947	0.579854	1.11903e-08	2.58528e-06
EEF1E1P1	1.49454	0.579703	4.19092e-08	7.16661e-06
RAD54L	1.49424	0.579411	5.28676e-07	4.82647e-05
HCN3	1.49422	0.579389	2.54928e-07	2.76957e-05
AC009065.5	1.49387	0.579052	0.0240833	0.136562
ZNF311	1.49342	0.578623	1.03473e-05	0.000450176
PYCR1	1.49328	0.578489	0.000856849	0.0124741
NSUN7	1.49321	0.578421	0.000449511	0.0077124
GPR27	1.49295	0.578169	0.00679727	0.0565882
WDR43	1.49295	0.578165	2.30285e-10	1.34377e-07
CMSS1	1.49271	0.577933	2.07776e-07	2.37586e-05
POU2F3	1.49263	0.577853	0.00199164	0.0232387
FBXO34	1.49251	0.577738	3.30763e-07	3.36619e-05
PRSS50	1.49233	0.577563	0.00205311	0.0237551
E2F7	1.4923	0.577536	0.000211634	0.00438628
MIR570	1.49208	0.577327	0.000532187	0.00876174
CENPA	1.49193	0.577175	3.06045e-09	9.63514e-07
AL033384.1	1.4919	0.57715	0.0041981	0.040044
C5orf30	1.49158	0.576846	4.33487e-07	4.11682e-05
SYNE4	1.49149	0.576757	0.0108273	0.0786406
ADGRF1	1.49148	0.576744	0.0125275	0.087034
DANCR	1.49118	0.576458	1.92115e-05	0.000731843
AP003555.2	1.49101	0.576294	0.000218954	0.00450008
SAMD12	1.491	0.576281	0.000131569	0.00308623
KLHL2P1	1.49072	0.576014	3.4157e-06	0.000195289
RNA5SP139	1.4906	0.57589	3.9262e-07	3.8184e-05
KLC3	1.4905	0.575795	0.00924019	0.0704797
TMEM238L	1.49041	0.575711	0.00527496	0.0472337
FEZF1	1.4904	0.575702	0.000596107	0.0095367
MYO16.AS1	1.49004	0.575349	0.00260797	0.0282736
TMEM44.AS1	1.48986	0.57518	6.12574e-06	0.000301766
ESPL1	1.48959	0.574912	9.67811e-07	7.54546e-05
PTPRU	1.4894	0.574733	0.00363791	0.0361877
LDLRAD1	1.48909	0.574435	0.00240765	0.026648
EXOSC5	1.48889	0.574238	2.10092e-08	4.23189e-06
FAM217B	1.48883	0.574176	9.35795e-09	2.26358e-06
MIR4653	1.48849	0.573849	0.00106944	0.0146285
BEST4	1.48825	0.573621	2.39944e-06	0.000148429
MBNL3	1.48824	0.57361	4.11571e-06	0.000224213
RTN2	1.48781	0.573186	1.07475e-05	0.000462826
SCML2	1.48768	0.573068	0.000121974	0.00292171
AP001469.3	1.48727	0.572667	1.19563e-09	4.89856e-07
AC016355.1	1.4865	0.571919	1.42666e-09	5.48362e-07
ZNF485	1.48642	0.571844	1.32841e-10	8.84594e-08
F12	1.48639	0.571812	0.000136903	0.00318234
MTCO2P12	1.48634	0.571768	0.00107809	0.0147183
TPPP	1.48523	0.570686	0.00709747	0.0583318
CNTD1	1.48496	0.570428	2.87655e-06	0.000170979
OVOL2	1.48491	0.570374	0.000168455	0.0037144
ARHGEF4	1.48438	0.569857	0.0061633	0.0528118
LBR	1.48437	0.569847	1.93636e-07	2.25055e-05
GGT6	1.48393	0.569419	0.00572451	0.0501292
SLC9A2	1.48341	0.568915	0.00276333	0.0295225
EFNA3	1.48337	0.568879	0.00204379	0.0236909
CDC7	1.48314	0.56865	9.47398e-08	1.31433e-05
EFS	1.48306	0.568578	0.0215624	0.126605
YBX1P10	1.48296	0.568483	1.45131e-06	0.000102046
COLEC11	1.48263	0.568156	0.00113737	0.0153062
FAM221A	1.48259	0.56812	6.1034e-06	0.00030119
TEX30	1.48259	0.568119	7.31128e-09	1.89904e-06
GOLIM4	1.48257	0.5681	0.000421211	0.00733339
TM4SF19	1.48252	0.56805	0.00962132	0.0724954
MXI1	1.48252	0.568048	5.21504e-06	0.000268591
THRB	1.48229	0.567831	0.000130836	0.00307591
RNU6.8	1.4822	0.567737	0.000352384	0.00642164
HSD17B8	1.48211	0.567652	1.92125e-07	2.24683e-05
RNF227	1.48191	0.567453	1.49391e-06	0.000104393
MYO1D	1.48152	0.567078	2.73691e-06	0.000164279
ZNF326	1.48129	0.566851	3.09013e-10	1.65007e-07
TAF4B	1.48128	0.566849	1.24418e-05	0.000517818
TWNK	1.48116	0.566724	4.54041e-08	7.64871e-06
RAC3	1.48112	0.566684	0.00136566	0.0175282
ESPN	1.48097	0.56654	0.00129069	0.0168409
DKC1	1.48075	0.566326	2.80994e-09	9.30107e-07
ATP13A4	1.48057	0.566156	0.00752815	0.0608466
CNIH2	1.48052	0.566106	0.0011636	0.0155923
ZNF77	1.48022	0.565816	9.99597e-08	1.37328e-05
VIPR1	1.48006	0.565659	0.000368068	0.00664646
HMSD	1.48004	0.56564	0.00165666	0.0202659
FDXR	1.4799	0.565498	2.85196e-08	5.32761e-06
AP001033.1	1.47965	0.565256	0.00013385	0.00312677
ARSG	1.47954	0.565149	1.22706e-09	4.95467e-07
FOXO6	1.4794	0.565015	0.000694291	0.0107239
ACPP	1.47913	0.564751	0.00485702	0.0444241
CADM4	1.47909	0.564714	0.00160866	0.0198763
DPH2	1.47897	0.564592	2.12587e-10	1.28009e-07
AC138904.1	1.47863	0.564264	3.94038e-05	0.00125159
PINLYP	1.47846	0.564099	0.00235115	0.0262238
MARC1	1.47744	0.563102	5.24418e-05	0.00155084
AC074117.1	1.47744	0.5631	1.57564e-08	3.39981e-06
AC068870.2	1.47734	0.563006	3.13759e-05	0.00105483
RNY3P8	1.47691	0.562579	0.00106282	0.0145573
FA2H	1.4769	0.562572	0.0153813	0.100576
C4orf19	1.47675	0.562425	0.0248032	0.13929
MYH14	1.47598	0.561677	0.00892162	0.0687892
TIAM1	1.47582	0.561515	0.0010554	0.0145065
CNNM3.DT	1.4756	0.561303	4.99988e-08	8.22684e-06
ADAMTSL3	1.47527	0.560981	0.000697334	0.0107549
AL359643.3	1.47511	0.560823	9.28061e-08	1.29704e-05
GLS2	1.47508	0.560794	4.73365e-09	1.33967e-06
AC093627.4	1.47494	0.560661	0.00013048	0.00307087
KPNA7	1.47481	0.56053	4.90501e-05	0.00147645
LINC00346	1.47403	0.559768	0.000160236	0.00357131
UTP4	1.474	0.559737	2.33108e-11	2.16301e-08
MIS18BP1	1.47385	0.559591	4.04401e-07	3.89947e-05
EZH2	1.47363	0.559376	1.95836e-07	2.26656e-05
KLHDC2	1.47362	0.559366	9.4541e-08	1.31433e-05
TPPP3	1.47339	0.559143	0.0182206	0.113195
FOXD3	1.4731	0.558855	0.00127046	0.0166229
PRKX	1.47306	0.558813	0.000540336	0.00885726
INSIG1	1.47286	0.558619	0.000145855	0.00333459
FEZF1.AS1	1.47263	0.55839	0.00757821	0.0611202
MAOA	1.47258	0.558349	0.0277467	0.150045
SDHAF3	1.47253	0.558294	4.04764e-08	6.98489e-06
INA	1.47208	0.557861	0.0332706	0.168911
KIF11	1.47202	0.557799	1.91086e-07	2.2393e-05
AC005082.1	1.47193	0.557704	0.0209485	0.124251
ARTN	1.47192	0.557697	0.0131788	0.0901553
AC040169.1	1.47165	0.557438	5.09006e-05	0.00151636
SIAH2.AS1	1.47156	0.557346	4.11998e-08	7.07777e-06
HMGN2P3	1.47108	0.556872	0.000128596	0.00303748
PRR19	1.47101	0.556809	1.46956e-07	1.87766e-05
STIL	1.47099	0.556785	8.29675e-08	1.18889e-05
FOXN3	1.46968	0.5555	4.20507e-06	0.000227114
CDCA8	1.46897	0.554808	6.85608e-08	1.046e-05
RAMP2	1.4689	0.554734	5.64541e-05	0.001637
GTF2A1	1.46879	0.554625	3.20731e-07	3.28282e-05
HYAL1	1.46844	0.554287	0.00484298	0.0443492
AC046143.1	1.46781	0.553668	2.22371e-06	0.000141106
AP002387.2	1.46776	0.553618	6.74729e-05	0.00187948
HR	1.46753	0.55339	0.0136373	0.0922548
FBXO32	1.46748	0.553344	0.000155293	0.00350614
NETO2	1.46736	0.553221	4.75116e-05	0.00144037
HELLS	1.46715	0.553015	1.73951e-07	2.09489e-05
PDIK1L	1.46711	0.552976	1.06324e-06	8.12165e-05
C6orf132	1.46704	0.55291	0.000283921	0.00549983
EFCC1	1.46691	0.552781	0.000292235	0.00561301
PRPS2	1.46639	0.552269	3.99103e-07	3.85495e-05
AL390726.5	1.46632	0.552198	5.02943e-05	0.00150225
KLK14	1.46627	0.552152	0.0270953	0.147777
SH3PXD2A.AS1	1.46601	0.551896	0.0157425	0.102225
HIST1H2BL	1.466	0.551883	2.58043e-08	4.90627e-06
AC009113.1	1.46598	0.55187	1.39266e-06	9.84453e-05
CYB5R2	1.46586	0.551747	0.000130711	0.00307503
ZC3H8	1.46575	0.551635	2.12388e-10	1.28009e-07
AC091153.3	1.46564	0.551527	1.01527e-06	7.8506e-05
PDE4C	1.46559	0.551484	0.00218651	0.0249
PPM1D	1.46524	0.55114	2.40877e-09	8.2631e-07
AC007342.8	1.46507	0.550965	0.00746086	0.0604754
MAL2	1.46505	0.550948	3.29893e-05	0.00109261
GTPBP3	1.46482	0.550727	2.07774e-11	1.96007e-08
AC004816.1	1.46447	0.55038	0.000257687	0.00511595
RCC1	1.46441	0.550318	9.19399e-11	6.84735e-08
SERTAD4.AS1	1.46431	0.550225	0.00390575	0.0381029
TBCCD1	1.46428	0.550193	1.61244e-06	0.000111031
LINC00885	1.46427	0.550179	0.0171016	0.108481
TMEM201	1.46402	0.549939	9.0049e-10	3.93606e-07
LACTB2	1.46387	0.549788	9.11498e-08	1.2848e-05
USP13	1.46377	0.549687	8.10463e-05	0.00215471
WDR3	1.46376	0.549678	2.98372e-07	3.11595e-05
BFSP1	1.46357	0.54949	2.33103e-06	0.000145885
SLC27A5	1.46347	0.549389	1.12671e-06	8.49189e-05
ALKBH2	1.46303	0.548964	1.30521e-12	2.5475e-09
LY75	1.46297	0.548902	2.50111e-05	0.000889805
CPT1A	1.46292	0.548849	3.02147e-05	0.00102469
GRTP1	1.462	0.547941	5.06679e-05	0.00151181
AC024592.2	1.46194	0.547887	0.00124586	0.0163843
CAD	1.46194	0.547885	1.88314e-07	2.216e-05
MTND2P28	1.46191	0.547857	0.0171077	0.108481
NCAPH	1.46165	0.547597	1.6949e-07	2.04989e-05
ASB2	1.46154	0.547486	0.00478809	0.043996
KIF18B	1.46132	0.547269	8.72458e-07	6.94555e-05
TRIM59	1.46061	0.546575	9.99117e-06	0.000438728
TTC8	1.46061	0.546573	1.63708e-07	1.98846e-05
AC080037.1	1.46043	0.546393	0.000721629	0.0110215
FAM171A2	1.46034	0.5463	0.00897506	0.0690132
AL590666.2	1.45982	0.545788	0.00615346	0.0527706
ULBP3	1.4598	0.545774	0.00125978	0.0165136
TRAP1	1.45957	0.545544	7.01318e-07	5.88961e-05
RF00432.5	1.45867	0.544649	0.0133318	0.0907951
PRMT5	1.45863	0.54461	2.31129e-05	0.000838077
PCK2	1.45859	0.544571	1.21987e-07	1.60574e-05
THNSL1	1.45831	0.544298	3.45177e-07	3.47029e-05
MINCR	1.4577	0.543696	2.81067e-05	0.000973025
BZW2	1.45742	0.543413	9.33316e-09	2.26358e-06
AC022211.2	1.4569	0.542902	2.72355e-09	9.1218e-07
ECE2	1.45689	0.542893	3.46138e-07	3.47377e-05
SNHG21	1.45663	0.542634	1.38611e-08	3.0647e-06
KIF21A	1.45641	0.542416	1.82613e-05	0.000705067
AC004951.2	1.45626	0.542272	0.0131007	0.089793
NINL	1.4562	0.542208	0.00024	0.00484348
GLRX5	1.45612	0.542134	4.30391e-12	5.80024e-09
AL512598.1	1.45578	0.541794	0.000287848	0.00555309
TPX2	1.45549	0.541504	7.57228e-08	1.11326e-05
XKR9	1.45481	0.540835	0.000197071	0.00416063
AL163051.1	1.45462	0.540644	3.76482e-09	1.14568e-06
PPP1R3E	1.45462	0.540638	5.75529e-06	0.000286802
FAM83E	1.45451	0.540535	0.0464372	0.210848
OSR2	1.45451	0.540533	0.000272095	0.0053199
DHCR24	1.45446	0.54048	9.79753e-05	0.00247571
RFC3	1.45437	0.540399	3.634e-06	0.000204872
BDH1	1.45419	0.54022	6.86895e-05	0.0019068
RAB11FIP1	1.45393	0.539955	0.00662922	0.0555892
MIR429	1.45377	0.539804	0.0211566	0.125092
CCNE2	1.45349	0.539518	0.000476339	0.00804109
CHRNA5	1.45291	0.538945	3.84837e-05	0.00122788
FBXO41	1.45291	0.538942	7.27997e-06	0.000342243
AC093904.2	1.45273	0.538769	3.1773e-05	0.00106289
LBX2.AS1	1.45272	0.538755	0.000711843	0.0109162
TKTL1	1.45263	0.538664	0.00505035	0.0457302
LINC01559	1.45263	0.538663	0.0174637	0.109917
ACAP2	1.45217	0.538212	2.39643e-05	0.000862009
MIR6867	1.45201	0.538049	0.000643204	0.0101341
IGFL3	1.4515	0.537547	0.00911018	0.0697371
SMC3	1.4509	0.536946	2.56469e-05	0.000905592
AP003068.2	1.45079	0.53684	4.33919e-05	0.00134653
APPL2	1.45061	0.536658	7.36112e-06	0.000344912
PARD3	1.45048	0.536533	7.34404e-06	0.000344397
MIR4263	1.44992	0.535975	0.000934827	0.0133048
THAP7.AS1	1.4494	0.535457	7.35685e-07	6.13273e-05
CHST9	1.44931	0.535365	0.00170286	0.0206658
TUBAL3	1.44909	0.535144	3.90293e-05	0.00124318
L2HGDH	1.44903	0.535087	3.1421e-07	3.25041e-05
F2RL1	1.44891	0.534973	0.009507	0.0718925
AL355353.1	1.4488	0.534862	0.000593973	0.00950793
ULK3	1.44874	0.534796	3.93919e-08	6.86049e-06
ANKS6	1.44865	0.534712	3.61153e-05	0.0011728
AC016877.3	1.4485	0.534558	4.21427e-05	0.00131642
U91328.1	1.4484	0.534461	2.03915e-06	0.000131308
ALDOC	1.44836	0.534423	0.00821532	0.0647988
AC010442.1	1.44823	0.534287	2.11084e-05	0.000786036
AL590327.1	1.44816	0.534225	1.05303e-05	0.000455683
ABHD14B	1.44788	0.533939	4.7498e-07	4.41458e-05
LNX1	1.4478	0.533863	0.000897323	0.0128842
EXOC3.AS1	1.44739	0.533451	1.53761e-05	0.000617686
DEK	1.44723	0.533291	4.51112e-07	4.22746e-05
GDAP1	1.44722	0.533287	0.000757718	0.0113886
WDR76	1.44697	0.533039	3.4201e-06	0.000195343
LINC01752	1.44671	0.532775	0.00507868	0.0459253
ACOT1	1.44668	0.532744	4.73107e-05	0.00143509
BRI3BP	1.44658	0.532644	7.53595e-08	1.11326e-05
LINC02244	1.44612	0.532185	0.000242267	0.00487654
UPF3B	1.44588	0.531943	1.3198e-07	1.72524e-05
TDRD10	1.44536	0.531432	0.0176453	0.110585
AC007342.9	1.44532	0.531389	0.0145426	0.096612
RASAL1	1.44505	0.531116	0.00712713	0.0584903
CYP4F11	1.44486	0.530932	0.0386287	0.186739
CDT1	1.44484	0.530911	1.21962e-07	1.60574e-05
PRIMA1	1.44479	0.530856	0.0372285	0.182081
BAALC.AS1	1.44446	0.530527	2.29361e-05	0.000833802
ZNF114	1.44441	0.530483	0.00971347	0.0728697
DEPDC1	1.44439	0.530459	7.23055e-06	0.000340202
MYSM1	1.44387	0.529941	2.8314e-05	0.000979603
UBR7	1.44378	0.529852	1.08734e-07	1.47238e-05
MIR6835	1.44375	0.529825	0.00218933	0.0249137
ARVCF	1.44349	0.529558	0.000507733	0.0084473
MCM2	1.4431	0.529167	4.19147e-06	0.000226595
PARD3.AS1	1.44298	0.529053	0.000227971	0.00465163
AC118553.1	1.4428	0.528875	3.88019e-06	0.00021532
MAT1A	1.44263	0.528697	0.00666003	0.0557979
MYO15B	1.44193	0.527999	0.00424051	0.0403533
KHSRP	1.44174	0.527815	2.14495e-09	7.49436e-07
TBL1X	1.44151	0.527581	0.000136903	0.00318234
TDP1	1.44118	0.527252	6.1046e-10	2.90364e-07
CAMTA1.DT	1.44066	0.526734	5.0862e-06	0.000263153
EPHX1	1.44043	0.526498	0.00264653	0.0285603
PRC1	1.44027	0.526336	1.64981e-05	0.000654396
TSNARE1	1.44012	0.526188	3.15624e-07	3.25083e-05
GAST	1.44002	0.526087	0.0375227	0.18306
STEAP1	1.43963	0.525697	0.00945223	0.0715548
BAIAP2L2	1.43941	0.525482	0.0342831	0.172615
ABCA13	1.43884	0.524904	0.0254241	0.14143
TBL1XR1	1.43871	0.524777	7.12799e-07	5.97717e-05
DNAJC9	1.43865	0.524712	3.04421e-06	0.000178432
TNXB	1.43858	0.524641	2.35419e-06	0.000146495
SYNE2	1.43846	0.524523	7.108e-05	0.0019578
KRT9	1.43833	0.524393	0.0087632	0.06791
HIST1H3B	1.43817	0.524237	0.000797789	0.011849
REEP6	1.43816	0.524226	0.00933298	0.0709637
IL17RE	1.43809	0.52415	0.000451104	0.00773505
TFCP2L1	1.43762	0.523683	0.0323141	0.165734
TET3	1.4371	0.523158	4.1705e-05	0.00130926
SLC2A12	1.43693	0.522991	0.00394364	0.0383866
SPTBN2	1.43683	0.522893	0.000761761	0.0114278
C18orf54	1.43682	0.522876	3.07815e-06	0.000179989
PAK1IP1	1.43659	0.522653	9.38604e-07	7.37054e-05
LPAR3	1.43657	0.52263	0.0410732	0.19466
RPP21	1.43638	0.522436	1.39824e-09	5.42076e-07
KCNE2	1.43623	0.522285	7.3425e-11	5.85352e-08
AC005288.1	1.43614	0.522199	0.000418026	0.00729009
HADH	1.43601	0.522061	7.56515e-07	6.25113e-05
HIST1H2BH	1.43588	0.521939	0.00381802	0.0374725
GSTM3	1.43577	0.521827	0.0423851	0.198756
ZNF711	1.43562	0.521676	0.0150337	0.0990155
ERBB3	1.43558	0.521635	0.000336919	0.0062147
TFAM	1.43553	0.521585	1.76645e-08	3.73077e-06
TOPBP1	1.43541	0.521466	1.09597e-05	0.000468534
AADAT	1.43536	0.521414	0.0108516	0.0787163
TSPAN6	1.43506	0.521116	1.07593e-05	0.000462826
AC138466.1	1.43506	0.521116	1.88901e-05	0.000723416
LINC01063	1.43477	0.520821	0.000108287	0.00268023
TRIM45	1.43441	0.52046	2.15536e-05	0.000797894
TRMT5	1.43441	0.520453	6.54212e-12	8.41584e-09
VAV3	1.43431	0.520361	0.0199731	0.120427
SNORD17	1.43429	0.52034	0.000326602	0.00610064
HMGA1P5	1.43373	0.519777	0.0141226	0.0945292
NKX1.2	1.43369	0.519729	0.00179526	0.0214604
HEATR1	1.43356	0.519605	4.1839e-05	0.00131114
PVT1	1.43356	0.519605	7.16194e-05	0.00196787
LINC02323	1.4332	0.519242	0.000348599	0.00636497
TMEM145	1.43315	0.519191	0.00029253	0.0056147
ASTE1	1.43299	0.51903	7.73809e-08	1.13086e-05
TTF2	1.43254	0.518578	3.97396e-06	0.000218807
TMEM52	1.43216	0.518198	0.00074466	0.0112465
MAZ	1.4321	0.518133	0.000281076	0.00545592
AC010643.1	1.43191	0.517946	0.00537652	0.0477667
ATAD5	1.4319	0.517928	5.03716e-08	8.26415e-06
GDPD1	1.43181	0.517838	1.80618e-05	0.000698795
AC099518.1	1.43154	0.517571	3.20324e-05	0.00106936
AC006449.6	1.43146	0.517489	7.3531e-07	6.13273e-05
CAMKMT	1.43146	0.517488	3.66856e-08	6.4487e-06
DHTKD1	1.43138	0.517405	3.5026e-05	0.00114598
TNFSF9	1.43134	0.517367	0.0363381	0.179336
FAM174B	1.43129	0.517315	0.0216574	0.126979
HMGN1P4	1.43125	0.517278	0.000228702	0.00466318
AMOT	1.4311	0.517128	0.0461806	0.210192
AC080038.4	1.43073	0.51675	1.12615e-07	1.51049e-05
TBC1D8	1.43066	0.516678	0.000176086	0.0038334
TESK2	1.43062	0.516639	0.000144447	0.00331549
POLR3G	1.4304	0.516422	8.1601e-05	0.00216641
OPN3	1.43039	0.51641	0.00117438	0.0157183
AC008735.2	1.43031	0.516324	0.00238304	0.0264948
PXYLP1	1.43027	0.516287	9.51625e-05	0.00242085
Z82243.1	1.42983	0.515843	1.06982e-06	8.16094e-05
SLC2A10	1.42931	0.515316	0.0329445	0.167948
CIPC	1.42916	0.515166	9.1376e-06	0.000409182
AL158206.1	1.42903	0.51504	0.00013166	0.00308688
PPAT	1.4289	0.514903	1.37497e-06	9.77716e-05
TRIP13	1.4288	0.514799	2.78241e-05	0.000967512
ADRA2B	1.42867	0.514668	0.00071535	0.0109552
FASN	1.42864	0.514639	0.00150725	0.0188788
AL033527.3	1.42862	0.514624	8.33691e-12	9.43772e-09
CASTOR3	1.42852	0.514518	1.9788e-05	0.00074869
RRS1	1.42851	0.514511	1.08994e-06	8.26983e-05
AC068587.2	1.42848	0.514481	0.000391788	0.00694519
AC010998.3	1.4284	0.514404	0.00036726	0.00663718
POMC	1.42829	0.514293	0.0444331	0.205122
LRRCC1	1.42827	0.514266	3.73741e-05	0.0012025
OPA1	1.42819	0.514187	6.98186e-07	5.88076e-05
AC093904.4	1.42768	0.513676	8.38371e-05	0.00221022
PATZ1	1.42766	0.513652	0.000158173	0.0035387
PNPT1	1.42755	0.513537	1.94973e-08	4.01303e-06
KLHL23	1.42729	0.513279	0.000970038	0.013664
CDC25B	1.4272	0.513188	3.15234e-05	0.00105767
PM20D2	1.42718	0.513169	0.000548485	0.0089597
KIAA0319	1.42675	0.512736	0.00158929	0.0196714
PNMA6A	1.42659	0.51257	0.0172497	0.109079
C14orf132	1.42649	0.512474	0.00510394	0.0460608
PLAGL2	1.4264	0.512382	5.68634e-05	0.00164432
ECT2	1.42621	0.512185	8.64201e-05	0.00225938
NANP	1.42614	0.512119	4.59462e-08	7.7036e-06
ABCA5	1.42612	0.512097	2.11839e-05	0.000787048
ZNF318	1.42599	0.51196	5.42322e-06	0.000276795
SLK	1.42535	0.511316	3.69568e-05	0.00119329
BORA	1.42531	0.511276	1.13989e-05	0.00048366
NPTXR	1.42516	0.511124	0.0214088	0.125982
KCNQ4	1.42439	0.510342	0.000101466	0.00254908
EXD2	1.42417	0.510119	2.37547e-07	2.6261e-05
PERP	1.42406	0.510005	0.0100164	0.0745006
PITPNA.AS1	1.42384	0.509783	9.51478e-06	0.000422467
RNU6.882P	1.42371	0.509655	0.000326685	0.00610064
TSEN54	1.42347	0.509417	5.13936e-10	2.5615e-07
DNPH1	1.42341	0.509354	7.89104e-07	6.44515e-05
CENPJ	1.42338	0.50932	1.05086e-06	8.03794e-05
NECTIN4	1.42336	0.509302	0.00952405	0.0719541
ZPBP2	1.4233	0.509245	0.000218152	0.0044885
SLC52A3	1.42295	0.508885	0.00348923	0.0350297
AL138976.2	1.42291	0.50884	6.58621e-05	0.00185009
SPAST	1.42281	0.508746	8.88938e-08	1.26104e-05
AC064836.3	1.42276	0.508694	7.69495e-05	0.00207757
MAPK13	1.42274	0.508674	1.25306e-06	9.17537e-05
STMN1	1.42259	0.508524	2.21613e-05	0.000812419
USP54	1.42234	0.50827	0.000585083	0.00939753
LINC00342	1.42219	0.50811	0.00601631	0.0519267
GPD2	1.42204	0.507965	9.56201e-07	7.47554e-05
DLST	1.42196	0.50788	4.12647e-08	7.07777e-06
CENPF	1.42183	0.50775	2.93475e-05	0.00100553
NUSAP1	1.42167	0.507591	5.7254e-06	0.000286787
LIN52	1.42155	0.507461	7.17685e-08	1.08616e-05
KHDC1L	1.42152	0.50743	0.0100055	0.0744386
PDK2	1.42147	0.507383	1.8126e-06	0.00012056
RNASEH1.AS1	1.42142	0.507331	8.8892e-05	0.00230273
GPR62	1.42134	0.507249	1.01809e-08	2.41113e-06
SPRR4	1.42128	0.507189	0.0330448	0.168262
GTF2IRD2P1	1.42128	0.507189	0.00713086	0.0585043
AL162377.1	1.42124	0.507155	3.5129e-09	1.09251e-06
AL121820.2	1.4212	0.507108	0.0158672	0.102712
C2CD4D	1.42103	0.50694	5.0235e-06	0.000260624
HIST1H2AI	1.42086	0.506766	0.00176411	0.0211816
E2F1	1.42084	0.506747	2.5056e-05	0.000890841
CUEDC1	1.42075	0.506655	0.00141935	0.0180328
ELL3	1.42061	0.506513	2.32804e-08	4.54386e-06
AC009121.2	1.42048	0.506375	9.87971e-07	7.68148e-05
FAF1	1.42043	0.506329	3.42166e-12	5.09665e-09
SNX31	1.42033	0.506227	0.0155152	0.10123
FANCA	1.42028	0.506177	5.71125e-06	0.000286331
FAM201A	1.41996	0.505849	2.59259e-05	0.000913734
MCTS2P	1.41993	0.505818	0.00150432	0.0188547
MAGEF1	1.4199	0.505785	7.92908e-05	0.00211951
AL512408.1	1.41929	0.505166	4.00093e-05	0.00126332
CENPQ	1.41911	0.504985	1.66292e-06	0.000113015
PGRMC1	1.41884	0.504709	1.90411e-07	2.23603e-05
RNF168	1.4187	0.504574	6.69618e-05	0.00187261
CAPN5	1.41861	0.504481	0.0466425	0.211466
AL354892.2	1.41817	0.504033	0.000132978	0.00311026
BX537318.1	1.41815	0.504007	6.58023e-06	0.000318481
TTLL5	1.41811	0.503969	7.764e-09	1.96939e-06
AL139289.2	1.41807	0.503932	7.58481e-05	0.00205611
AC211486.1	1.41799	0.503852	2.77375e-08	5.23333e-06
PRTFDC1	1.41793	0.503791	0.00204167	0.0236711
RHPN1.AS1	1.41774	0.503592	7.22043e-05	0.00197913
LRIG1	1.41764	0.503487	0.0121199	0.0848918
AC005534.2	1.41734	0.503185	2.22549e-08	4.4199e-06
AC002116.2	1.41673	0.502561	1.51846e-07	1.90811e-05
C1orf53	1.41669	0.502523	0.000177986	0.00386436
ITPRIPL2	1.41658	0.502413	0.00210813	0.0242086
SPATA25	1.41637	0.502197	7.04336e-06	0.000334453
ZNF280C	1.41636	0.502184	1.94721e-05	0.000739645
THAP10	1.41631	0.502138	4.29938e-06	0.000231545
PLK1	1.41628	0.502106	2.45964e-06	0.000150999
CDK4	1.41617	0.501991	1.76223e-05	0.000684595
NGDN	1.41583	0.501644	6.89853e-12	8.67712e-09
TXNRD1	1.41582	0.501642	0.00330761	0.0336359
TULP1	1.41552	0.501328	8.39904e-15	4.41256e-11
MELTF.AS1	1.41533	0.501136	0.000322459	0.00603366
LGALS3	1.41526	0.501066	0.000200293	0.00420512
HCG4B	1.41517	0.50098	0.00397677	0.0385991
LIPE.AS1	1.41498	0.500782	2.47075e-05	0.000882331
FAM182B	1.41496	0.500766	0.000310048	0.00584587
FANCE	1.41493	0.500731	3.45048e-05	0.00113247
AL355338.1	1.41473	0.500528	4.00187e-05	0.00126332
NPM3	1.41466	0.500459	2.26629e-05	0.000825461
FAM83B	1.41455	0.500347	0.0252018	0.140612
TTK	1.4142	0.49999	1.69861e-06	0.000115006
AC068473.5	1.41413	0.499912	2.82652e-06	0.000168585
SEMA6C	1.414	0.499781	0.000464665	0.00790056
CPNE2	1.41394	0.499724	7.06057e-05	0.00194663
HHAT	1.41388	0.499661	0.000113	0.00277053
AHCY	1.41357	0.499345	1.55945e-07	1.93147e-05
KIF22	1.41351	0.499282	3.03717e-09	9.63514e-07
ZNF296	1.41326	0.499022	4.87748e-05	0.00147083
ATG2B	1.41317	0.498934	1.2167e-06	9.01411e-05
RFX2	1.41287	0.498631	3.91288e-06	0.000216922
HIST1H2BJ	1.41283	0.498583	0.00916936	0.0701215
ANKRD65	1.41275	0.498511	0.0244703	0.138059
AL451165.2	1.41269	0.498448	2.24216e-06	0.0001418
CENPV	1.41242	0.498166	0.0229418	0.132007
CLUH	1.41232	0.498069	2.51839e-08	4.82135e-06
LINC00640	1.41224	0.497987	0.00189429	0.0223796
SLC25A43	1.41194	0.497682	0.00132345	0.0171694
LSG1	1.41189	0.497627	1.07509e-06	8.19008e-05
NAA20	1.41171	0.497445	4.13227e-07	3.96432e-05
AURKB	1.41166	0.497395	5.13317e-07	4.70091e-05
PLA2G3	1.4116	0.497336	0.0443375	0.204798
GMNN	1.41155	0.497284	3.71778e-06	0.000208144
EHHADH	1.41147	0.497196	7.75036e-05	0.00208501
SLC47A1P2	1.41121	0.496935	0.000530447	0.00873818
RNF183	1.41103	0.496753	0.0338441	0.170918
DLGAP5	1.41076	0.496473	3.03667e-06	0.000178432
TMEM121	1.41064	0.496348	0.00102221	0.0141901
DHCR7	1.41034	0.496042	0.000228218	0.004655
USP27X	1.41011	0.495803	5.43237e-06	0.000277011
ARG2	1.41009	0.495789	0.00671197	0.0561272
GLUD1	1.40976	0.495445	1.02576e-08	2.41917e-06
NIPAL2	1.40965	0.495333	0.00286265	0.0303487
MRM1	1.40964	0.495332	1.01376e-07	1.38266e-05
MPP3	1.40964	0.495326	3.17371e-05	0.0010625
ERG28	1.40947	0.495152	2.94436e-09	9.57798e-07
ASH1L.AS1	1.40934	0.495017	1.77931e-08	3.74396e-06
AL157931.1	1.40928	0.494957	0.0382186	0.185384
AC002059.2	1.40878	0.494451	0.000627541	0.00993569
AC015660.1	1.40849	0.494147	0.0110613	0.0798227
AMDHD1	1.40814	0.493795	0.00151914	0.0189857
SLC25A15	1.4081	0.493754	0.000120461	0.00289036
IFI16	1.40795	0.493594	0.0284913	0.152691
NELFCD	1.40779	0.493432	1.43383e-09	5.48362e-07
AL513123.1	1.40777	0.493411	8.3941e-05	0.0022109
PHLPP1	1.40768	0.493316	1.72389e-05	0.000673974
BCO1	1.40754	0.493177	0.0067651	0.0564443
TNFRSF11A	1.40726	0.492892	0.000156908	0.00352118
EXTL2	1.40723	0.492862	0.000156233	0.00351196
MARCH3	1.40716	0.492784	0.000113643	0.00278098
USH1G	1.40713	0.492754	0.0173067	0.109293
AC009309.1	1.40708	0.492707	5.01911e-05	0.00150154
UST	1.40696	0.492576	0.00878392	0.0680054
EIF4A2	1.40674	0.492357	4.78097e-06	0.000250104
AL035461.2	1.40668	0.492295	0.000765022	0.0114634
AL121790.1	1.4066	0.492213	0.000212218	0.00439515
MCM10	1.40632	0.491926	1.69497e-05	0.000665778
AL512353.1	1.40632	0.491922	1.54956e-10	9.63828e-08
FAM161A	1.40631	0.491916	4.39821e-05	0.00135814
DHX35	1.40625	0.49185	3.93798e-07	3.82329e-05
SLCO3A1	1.40622	0.491827	0.0032643	0.0333152
C15orf41	1.40613	0.491725	9.04532e-06	0.000406982
OMA1	1.40605	0.491645	1.68363e-07	2.04062e-05
DHX40	1.40561	0.491194	4.01128e-06	0.000220219
RPTN	1.4055	0.491084	0.0090975	0.069699
AGPAT5	1.40537	0.490951	1.60943e-05	0.000641075
SLC7A5P1	1.40527	0.490847	8.5971e-06	0.00039054
PPM1J	1.40509	0.490658	0.000107397	0.00266152
RASEF	1.40491	0.490482	0.00473502	0.0436146
RFC4	1.4048	0.490362	2.15665e-06	0.000137313
DBI	1.40478	0.490348	1.53274e-07	1.91514e-05
TRMT61A	1.40478	0.490347	9.73876e-10	4.11368e-07
SNHG25	1.40469	0.490252	0.00100305	0.0140046
SNORA11F	1.40417	0.489713	0.000710365	0.0108994
FAM102B	1.40406	0.489601	0.000390202	0.00693444
DNAJA4	1.40403	0.489577	5.02544e-05	0.00150185
FCF1	1.40403	0.489577	1.80717e-07	2.14949e-05
SIGMAR1	1.40377	0.489309	2.8603e-07	3.00368e-05
ARMCX5	1.4036	0.48913	6.31428e-07	5.47321e-05
HCG4	1.4036	0.489127	0.00417389	0.0398601
SYT17	1.40353	0.489064	0.00181104	0.0216035
SLC48A1	1.4035	0.489026	5.29475e-08	8.58721e-06
AC099850.3	1.40338	0.488908	0.00468635	0.0433215
GTF3C2	1.40335	0.488878	9.28233e-10	3.9782e-07
ARHGAP12	1.40296	0.488469	5.59384e-05	0.00162621
UNG	1.40291	0.488421	6.61302e-08	1.01715e-05
LIG1	1.40286	0.488375	8.33743e-07	6.68902e-05
ANGEL1	1.40281	0.488321	5.31825e-06	0.000272666
MTA1	1.40232	0.487813	1.16075e-06	8.67913e-05
CCDC86	1.40215	0.487643	2.32763e-06	0.000145885
SLC29A1	1.40213	0.487616	0.000651809	0.0102369
PRSS36	1.40193	0.487419	0.00100545	0.0140191
AC093249.6	1.40191	0.487394	5.08188e-07	4.66955e-05
LINC01348	1.40169	0.487164	0.00035797	0.0065046
PALB2	1.40162	0.487092	6.8913e-08	1.04855e-05
ENTPD5	1.40155	0.487023	8.15902e-06	0.000374851
AC104986.2	1.40145	0.486921	7.02241e-05	0.00193799
ZFP64	1.40138	0.486845	1.85561e-06	0.0001227
AL591846.2	1.40137	0.486834	5.14466e-08	8.40811e-06
AP1G2	1.40121	0.486674	5.54064e-06	0.000280058
TMEM185B	1.40109	0.486554	1.74995e-06	0.000117777
PRIM2	1.40103	0.486485	1.68026e-09	6.13588e-07
CDK1	1.40097	0.486431	2.48159e-07	2.71069e-05
ZNF639	1.4007	0.48615	2.33768e-06	0.000145885
FXYD3	1.40066	0.486105	0.0136789	0.0924595
MARK1	1.40061	0.48605	0.00989209	0.0738573
KMT2E.AS1	1.40059	0.486036	8.84362e-05	0.00229723
PPIAP35	1.40052	0.485962	2.17574e-10	1.29633e-07
MEAF6	1.40044	0.485877	2.03942e-08	4.12938e-06
MNAT1	1.4003	0.485735	7.58488e-07	6.2583e-05
LINC00857	1.40029	0.485729	0.00964401	0.0726028
LIN7B	1.40002	0.485446	6.96218e-06	0.000331712
AC060780.1	1.39979	0.485211	4.33377e-05	0.00134559
AC092903.1	1.39974	0.485158	0.00874625	0.0678251
AC254562.3	1.39974	0.485157	9.75856e-05	0.00246807
PRDX1	1.39969	0.485108	1.93538e-07	2.25055e-05
RIOK1	1.39955	0.48496	1.42045e-07	1.82727e-05
ZDHHC11B	1.39951	0.484926	0.00778245	0.0622442
CDC20	1.39946	0.48487	4.90951e-07	4.52586e-05
RERG	1.39937	0.484772	0.0131986	0.090236
DDX21	1.3992	0.4846	0.000269919	0.00528833
RAD9B	1.39914	0.484543	3.70885e-08	6.49933e-06
PELI1	1.39894	0.48433	0.000652192	0.01024
AC114956.2	1.39891	0.484298	0.0162207	0.104296
FAM222A.AS1	1.39889	0.484287	1.15995e-07	1.54848e-05
ANP32E	1.39888	0.484273	1.18555e-05	0.000497439
RPS6KA5	1.39886	0.48425	9.01167e-06	0.00040579
AC012615.1	1.39874	0.484128	2.17585e-05	0.000803765
CBR1	1.39862	0.484003	0.00123025	0.0162357
LINC00265	1.3985	0.483881	1.96718e-05	0.000745291
MGA	1.39842	0.4838	6.10594e-07	5.33346e-05
AC025265.1	1.39809	0.48346	1.8985e-05	0.000725583
AL133215.2	1.39798	0.483344	1.36444e-05	0.000560043
HLA.K	1.39793	0.483294	0.0350669	0.175093
PELI2	1.39769	0.483041	0.00535171	0.0476885
AC112220.2	1.39764	0.482993	3.47226e-06	0.000197922
PTPN13	1.39761	0.48296	0.0171822	0.108774
AP002360.1	1.3975	0.482852	0.000924401	0.0131729
KDF1	1.39746	0.482807	5.43605e-08	8.78595e-06
POLR1C	1.39743	0.482775	1.50726e-09	5.57608e-07
VPS9D1.AS1	1.39723	0.482572	0.00363388	0.0361678
TONSL	1.39715	0.482491	5.44954e-07	4.9459e-05
USP1	1.39713	0.482467	9.38291e-06	0.000418512
PSMC1	1.39707	0.482404	2.32352e-05	0.000841278
LINC02057	1.39697	0.482304	0.00177213	0.0212378
STK39	1.39687	0.4822	0.00129634	0.0168796
AL691432.2	1.39662	0.481942	1.422e-05	0.000579467
MNX1.AS1	1.39656	0.481882	0.00608232	0.052305
VSIG10	1.39656	0.481881	0.000110146	0.00271656
RADX	1.39636	0.481669	0.0111392	0.0801397
ATP11B	1.39636	0.481668	0.0017983	0.0214787
MBOAT2	1.39613	0.481438	0.00479304	0.0440272
COX5BP6	1.39611	0.481417	0.000430824	0.0074619
RF00019.163	1.39611	0.481416	0.000172013	0.00377374
NAA16	1.39609	0.481389	9.20606e-07	7.27628e-05
BRWD1.AS2	1.39585	0.481147	7.20128e-06	0.000339107
TRIT1	1.39575	0.481044	2.93849e-08	5.4712e-06
AC008946.1	1.39553	0.480811	1.72417e-05	0.000673974
GFM1	1.39552	0.480801	5.82447e-07	5.1512e-05
KLHL24	1.39549	0.480772	0.000668093	0.0104232
C1orf198	1.39548	0.480766	2.02595e-06	0.000130905
AC131097.3	1.39547	0.480755	0.0134391	0.0912521
ZCCHC14	1.39516	0.480431	2.13525e-05	0.000791482
MRPS26	1.39506	0.48033	9.21716e-07	7.27628e-05
NIP7	1.39503	0.480298	1.46295e-08	3.19714e-06
DNAAF2	1.39492	0.480184	7.56918e-08	1.11326e-05
DDX28	1.3948	0.48006	3.68352e-10	1.89541e-07
GSTO2	1.3948	0.480056	0.00110959	0.0150251
AC121338.2	1.39478	0.480041	4.40645e-06	0.000234645
KCNC3	1.39475	0.480008	0.00421863	0.0401923
AC079414.3	1.39462	0.479875	4.71103e-05	0.00142978
KAT2A	1.39455	0.479797	7.00532e-07	5.88961e-05
ZDHHC13	1.39441	0.479656	8.86927e-05	0.0022998
SMC4	1.39438	0.479623	0.00518415	0.0466433
EN2	1.39423	0.479464	0.00625326	0.0532571
TASP1	1.39407	0.479301	1.32689e-07	1.72654e-05
STK38	1.39381	0.479035	1.19458e-07	1.58351e-05
KLF4	1.39378	0.478999	0.0178814	0.111652
RNU6.353P	1.39373	0.478952	0.00135748	0.0174614
KRI1	1.39359	0.47881	2.82767e-07	2.98639e-05
AC005083.1	1.39353	0.478745	0.00158481	0.0196416
FAM84B	1.39351	0.478724	0.000384126	0.00685445
HMGB3	1.39342	0.478634	0.000156062	0.00351154
NUDT16P1	1.39331	0.47852	0.00308389	0.0320165
TMEM266	1.39329	0.478501	6.81753e-06	0.000326469
LINC01983	1.39311	0.478306	0.00126753	0.0165961
SMPDL3B	1.39308	0.47828	0.027421	0.148776
AC073896.2	1.39301	0.478203	1.43138e-06	0.000100788
PARP2	1.393	0.478197	2.21623e-08	4.41701e-06
ACBD5	1.3928	0.477984	9.75703e-06	0.000431459
AC092535.2	1.39272	0.477907	0.000165502	0.00366357
LARGE2	1.39271	0.477893	0.0129737	0.0891291
EPHX4	1.39266	0.47784	0.00766693	0.0616076
ALKBH1	1.39261	0.477792	5.87493e-10	2.81807e-07
TM4SF19.AS1	1.39256	0.477742	2.69563e-05	0.000943588
AL357079.1	1.39243	0.477607	1.76295e-06	0.000117979
TMTC4	1.39219	0.477352	0.000211045	0.00437727
DNMT1	1.39215	0.477315	3.23469e-05	0.00107878
PIGZ	1.3921	0.477261	0.000982429	0.0137881
MYORG	1.39194	0.477093	0.000592634	0.00949993
PEPD	1.39187	0.477024	4.49765e-07	4.22182e-05
FAM86C2P	1.39167	0.47682	4.34484e-07	4.11938e-05
WIPI1	1.39165	0.476799	0.000590759	0.00947256
IL22RA1	1.39156	0.476698	0.00771897	0.0619026
CELSR2	1.39153	0.476671	0.00239754	0.0265776
DBNDD1	1.39152	0.476665	0.00641298	0.0542907
AC007342.4	1.39147	0.476615	0.0165366	0.105727
MICU1	1.39145	0.476593	4.72903e-09	1.33967e-06
SASS6	1.39085	0.475965	9.97432e-07	7.74198e-05
ZNF507	1.39081	0.475924	3.0524e-07	3.1818e-05
WDR97	1.3906	0.47571	3.34186e-05	0.0011039
ZADH2	1.39046	0.475561	5.09128e-07	4.67061e-05
OIP5	1.39038	0.475484	2.04194e-05	0.000765932
WDR35	1.39027	0.475369	1.58588e-05	0.000633031
CDCA4	1.3902	0.475295	2.81341e-06	0.00016798
AIF1L	1.39016	0.475253	0.0100757	0.074863
GTSE1	1.39012	0.475211	0.000114335	0.0027931
MIPOL1	1.39003	0.475118	4.69556e-09	1.33967e-06
CYP2R1	1.39003	0.475111	0.000526704	0.00868916
CEP55	1.39002	0.475107	1.82177e-05	0.000703864
VPS16	1.38979	0.474864	2.74082e-09	9.12563e-07
PPT2	1.38974	0.474817	6.63536e-06	0.000320183
AL021391.1	1.38969	0.474763	0.000230108	0.00468511
NR2C2AP	1.38953	0.474601	4.00573e-08	6.95497e-06
MTPAP	1.38951	0.474574	3.94414e-09	1.18748e-06
RCL1	1.38944	0.4745	3.48756e-06	0.000198395
FIGNL1	1.38917	0.474218	4.07074e-06	0.00022262
NOLC1	1.38913	0.47418	1.66067e-06	0.000113015
DHRS11	1.38906	0.47411	1.04072e-06	7.98198e-05
ASAP3	1.38897	0.474014	0.00113508	0.0152789
AGBL5	1.38896	0.474001	1.82625e-06	0.0001209
LINC01144	1.38886	0.473898	8.18446e-07	6.62742e-05
AC006946.2	1.38881	0.473854	8.42033e-05	0.00221575
AC092164.1	1.38851	0.473533	2.26343e-07	2.54701e-05
UBQLN4	1.38841	0.473431	2.60164e-07	2.79959e-05
MAP3K13	1.38808	0.473095	1.07935e-05	0.000462826
AL606490.8	1.38803	0.473036	1.13837e-05	0.000483495
PIK3CA	1.3879	0.472903	1.75562e-05	0.000683436
RPA2	1.38783	0.472828	1.70122e-06	0.000115045
NHSL1	1.38773	0.472731	0.000128919	0.00304171
AC112777.1	1.38771	0.472708	0.000694882	0.0107258
AC138207.3	1.38767	0.47266	0.00726038	0.0592321
AP001432.1	1.38766	0.472658	2.056e-06	0.000132093
AC025166.1	1.38762	0.472617	0.00017972	0.00389303
TMPO.AS1	1.3873	0.47228	4.11272e-05	0.00129327
WNT11	1.38723	0.472208	0.03871	0.186983
DICER1	1.38723	0.472204	0.000120907	0.00289945
TFDP1	1.38711	0.472079	4.29013e-05	0.00133423
NUP210	1.38708	0.472054	0.000293186	0.00561969
HDDC3	1.38688	0.471845	2.74601e-07	2.92711e-05
PRIM1	1.38686	0.471818	2.09951e-07	2.39108e-05
SOX13	1.38675	0.471707	0.00053935	0.00884878
AC005336.1	1.38664	0.471594	0.0356071	0.176994
NEK3	1.38653	0.471475	3.13585e-05	0.00105483
AL122023.1	1.38642	0.47136	3.25201e-06	0.000187445
ATAD2	1.38637	0.471309	5.6823e-05	0.00164432
CCL26	1.38632	0.47126	0.00385635	0.0377315
SNX5	1.38631	0.471252	2.22403e-09	7.6759e-07
PARS2	1.38616	0.471097	3.03903e-08	5.6031e-06
DCLRE1B	1.38611	0.471045	4.89263e-07	4.52586e-05
NMNAT3	1.38608	0.471006	0.0092256	0.0704276
RF00019.624	1.3859	0.470822	2.65221e-05	0.000931272
CDKN2A	1.38578	0.470696	0.0127501	0.0880853
GINS2	1.3857	0.470611	4.08416e-06	0.000222709
CUZD1	1.3856	0.470512	1.59642e-07	1.9601e-05
CIDEB	1.38514	0.470033	1.63544e-06	0.000111875
BTBD7	1.38499	0.469876	2.41654e-05	0.00086735
DARS2	1.38489	0.469769	1.82938e-05	0.000705838
AP001207.3	1.38479	0.469669	0.0164604	0.105454
C6orf223	1.38475	0.469627	0.0477763	0.214527
ZMAT1	1.38473	0.469603	0.00703951	0.058007
EP300.AS1	1.38472	0.469595	0.00104139	0.0143736
AL662890.1	1.38467	0.469538	1.31488e-05	0.000543247
SESTD1	1.38463	0.469505	0.000392975	0.00695752
AC233723.2	1.38458	0.469446	2.52707e-05	0.000897347
AC005076.1	1.38447	0.469329	4.47004e-06	0.000237571
CAVIN2	1.38426	0.469119	0.0197342	0.119472
IL12A	1.38426	0.469118	0.00118012	0.0157838
TUBA1B	1.38421	0.469061	0.00129575	0.0168796
NLE1	1.38406	0.468909	5.98469e-08	9.40076e-06
LRR1	1.38402	0.468861	2.90521e-10	1.5661e-07
AC005722.2	1.38399	0.468834	0.00106308	0.0145573
KDELC1	1.38379	0.46863	0.000726365	0.011064
TAF9B	1.38373	0.468559	6.38114e-05	0.00180683
GEMIN2	1.38369	0.468517	1.93363e-08	4.00906e-06
AC138696.2	1.38367	0.4685	5.50602e-05	0.00160728
AGAP2.AS1	1.38338	0.468193	8.14694e-05	0.00216393
ZNF696	1.38334	0.46816	1.75542e-07	2.10956e-05
CHST7	1.38333	0.468149	0.00171557	0.0207799
HIST1H2BK	1.38329	0.468104	0.0194997	0.118539
SMARCD2	1.38324	0.468048	2.51547e-08	4.82135e-06
PRKAA2	1.38323	0.468046	0.0147722	0.0977249
C1QTNF4	1.38311	0.467918	0.00168309	0.0204829
C16orf70	1.38282	0.467614	2.00191e-06	0.000129625
FAM110C	1.38281	0.467599	0.018169	0.112961
RBBP8NL	1.38267	0.467458	0.00331078	0.033656
DDX27	1.38253	0.467315	9.27592e-10	3.9782e-07
AC012146.3	1.38237	0.467145	1.27837e-11	1.29211e-08
BRIX1	1.38234	0.467108	1.03129e-06	7.93887e-05
TMEM47	1.38223	0.466996	0.0321153	0.165058
PIF1	1.3822	0.466971	8.31681e-05	0.00219668
TACSTD2	1.38216	0.466927	0.0294629	0.155827
ASF1B	1.38209	0.466851	3.58231e-05	0.00116599
ISL2	1.38207	0.466832	0.0123149	0.0859492
CHERP	1.38203	0.466787	9.21944e-08	1.29168e-05
LINC01560	1.38194	0.466692	6.20407e-05	0.00176819
PPP5C	1.38192	0.466679	1.37045e-07	1.77101e-05
FBXO27	1.38191	0.466667	0.0498396	0.220213
GPR156	1.38184	0.466596	0.000307679	0.00581525
RTL8B	1.38184	0.466592	0.000642591	0.0101286
EME1	1.38184	0.466588	4.15486e-06	0.000225262
MIR5581	1.38174	0.466488	0.0128786	0.0886914
TPRG1.AS1	1.38172	0.466465	0.000928673	0.0132272
STXBP3	1.38164	0.466383	4.15082e-07	3.97538e-05
PDCD2L	1.38146	0.46619	7.58624e-06	0.000353413
RAD51B	1.38134	0.466073	8.54987e-07	6.82567e-05
LINC00853	1.38125	0.465973	0.00055724	0.00906347
PTPRA	1.38121	0.465935	7.70315e-07	6.32821e-05
BRIP1	1.3812	0.465924	1.98277e-06	0.00012885
C8orf82	1.38114	0.465858	3.93598e-06	0.000217775
HDHD5	1.38108	0.465798	5.82268e-07	5.1512e-05
ZNHIT6	1.38103	0.46574	2.52132e-08	4.82135e-06
DNAJC11	1.38088	0.465585	0.000100875	0.00253654
RNU4.89P	1.38078	0.465482	0.00150835	0.0188843
LINC00957	1.38056	0.465258	2.657e-06	0.000160161
KCNJ2.AS1	1.38038	0.46507	8.58333e-06	0.000390228
HPN.AS1	1.3803	0.464987	7.46585e-07	6.19231e-05
NASP	1.37994	0.464602	1.48874e-09	5.57178e-07
ATP8B1	1.37967	0.464319	0.00328713	0.0334939
RIOX1	1.37965	0.464303	1.02715e-06	7.92084e-05
AC073508.3	1.37951	0.464161	2.39369e-06	0.000148398
CENPU	1.37937	0.464004	0.000250712	0.00501973
MSH2	1.37914	0.463764	1.49297e-06	0.000104393
AC005064.1	1.37895	0.463571	3.6842e-05	0.00119298
POLR1B	1.37884	0.46345	1.04274e-06	7.98659e-05
MCM3	1.37868	0.463285	4.5713e-07	4.27677e-05
DENND2C	1.37848	0.463075	0.0464446	0.210865
SNHG20	1.37835	0.462947	1.62715e-05	0.000646317
MTATP6P1	1.37831	0.462895	0.00412426	0.0395614
TRERF1	1.3783	0.462885	0.00103063	0.014277
GRAMD2A	1.37804	0.462618	0.000868475	0.012598
AC011481.1	1.3779	0.462469	7.38308e-08	1.10848e-05
ZWILCH	1.37787	0.462439	2.40275e-06	0.000148472
RCOR1	1.37772	0.462281	0.000139038	0.00321874
HMGN2P5	1.3777	0.46226	3.31022e-05	0.0010957
CA11	1.37761	0.462172	0.00439324	0.0413823
AC002470.1	1.37737	0.461921	0.000328673	0.00611355
CROCCP2	1.37709	0.461621	2.19749e-05	0.000808729
SUPT16H	1.37697	0.461501	3.93889e-08	6.86049e-06
KIAA1671	1.37688	0.461401	8.6536e-05	0.00226082
LTB4R	1.37681	0.461329	0.0173011	0.109282
SLC9B2	1.37681	0.461326	0.000120943	0.00289945
ATP12A	1.37672	0.46124	0.0181988	0.11311
AC112484.3	1.37662	0.461126	0.00716808	0.0587245
AC063948.1	1.37655	0.46106	8.87383e-05	0.0022998
NET1	1.37647	0.460978	0.0003909	0.00694167
HIST1H4H	1.37644	0.460937	0.026199	0.144323
PCMTD2	1.37639	0.460892	2.32802e-05	0.000841446
SP3	1.37639	0.460887	3.04164e-06	0.000178432
CAMSAP3	1.37611	0.460598	0.00301131	0.0314476
MOK	1.37605	0.460533	1.02032e-05	0.000445961
CHAF1A	1.37541	0.459865	3.18517e-06	0.000185671
SRD5A1	1.37515	0.45959	0.000922266	0.0131492
ARID1A	1.37512	0.459557	0.000377905	0.00677547
MAGOH	1.375	0.459433	7.45917e-11	5.86395e-08
RBBP9	1.37498	0.459413	3.03235e-05	0.00102715
FRK	1.3749	0.45933	0.00118103	0.0157912
ADSS	1.37483	0.459254	2.31819e-06	0.00014547
EIF3L	1.3747	0.459113	0.00255007	0.0278217
MBTD1	1.3745	0.45891	3.65298e-06	0.000205533
NRM	1.37443	0.458838	1.45146e-05	0.000589351
SH3D19	1.37442	0.458821	0.000157479	0.00353014
DBNDD2	1.37423	0.458622	0.000233773	0.00474265
DCAKD	1.37412	0.458511	1.16688e-05	0.000491792
WBP2NL	1.37391	0.458288	1.34907e-09	5.33178e-07
CRYBG2	1.37384	0.458217	0.0392428	0.188767
FASTKD5	1.37373	0.458097	2.24001e-05	0.000819306
AC003070.1	1.37368	0.458046	0.00571335	0.0500599
KIF23	1.37342	0.457768	4.16712e-05	0.00130892
TIMELESS	1.3733	0.457646	3.18353e-05	0.00106435
SMAD3	1.37327	0.457618	0.00180392	0.0215321
HSD17B6	1.37304	0.457372	0.00416544	0.0398197
C1orf109	1.37303	0.457358	3.72927e-06	0.000208581
MCM4	1.3729	0.457225	5.61758e-07	5.04708e-05
AC010531.6	1.3728	0.457122	0.000573987	0.00927721
LINC00526	1.37255	0.456854	0.000206546	0.00431239
MCM6	1.37228	0.456573	1.00281e-07	1.37436e-05
AC092953.2	1.37221	0.456506	0.000150296	0.00341511
NEMF	1.3721	0.456389	0.000158011	0.00353731
AMIGO1	1.37197	0.456249	0.000472771	0.00800232
AC020612.2	1.37171	0.455971	4.35764e-06	0.00023313
MEST	1.37163	0.455894	0.00758164	0.0611218
TOP1MT	1.37163	0.455889	1.464e-05	0.000592741
CENPE	1.37157	0.455829	9.23868e-05	0.00237054
PFAS	1.37156	0.45582	0.000185907	0.00398587
TMC7	1.37144	0.455694	0.00126614	0.0165817
CNNM4	1.37137	0.455614	3.93139e-05	0.00125029
CYP2T3P	1.37124	0.455478	8.12789e-07	6.6005e-05
GIT1	1.37118	0.45542	5.24488e-10	2.58149e-07
TIPIN	1.37105	0.45528	4.2183e-08	7.1917e-06
AC100791.2	1.371	0.45523	6.11461e-06	0.00030148
DSG2	1.37091	0.455137	0.00508041	0.045929
B3GALT6	1.37089	0.455111	8.34325e-07	6.68902e-05
C1QTNF12	1.37084	0.455063	0.0195837	0.118948
RIPPLY3	1.37078	0.454996	0.0352187	0.175572
NTHL1	1.37074	0.454951	0.000217598	0.00448185
ZWINT	1.37074	0.454951	0.000173493	0.00379252
ENO1.AS1	1.37052	0.454727	1.14267e-06	8.5779e-05
UBL7.AS1	1.3704	0.454593	7.18005e-06	0.000338389
SPRYD4	1.37039	0.45459	7.79697e-11	6.04554e-08
FIRRE	1.37036	0.454555	0.00199955	0.0233065
NUDT7	1.37033	0.454524	0.00010473	0.00261027
AC068338.2	1.37031	0.454502	3.56612e-06	0.000201849
SLC25A5P1	1.37029	0.454483	1.16873e-05	0.000492205
RFWD3	1.3702	0.454384	4.53693e-06	0.000240449
FOXJ3	1.37019	0.454374	7.40069e-06	0.000346479
C3orf33	1.37015	0.45433	8.67925e-05	0.00226597
BCL6B	1.36995	0.454125	0.000852454	0.0124254
CDIP1	1.36963	0.453791	0.000116475	0.00282465
SMARCC1	1.36951	0.453661	7.70858e-05	0.00207828
NUP85	1.36949	0.453642	1.95472e-09	6.95857e-07
SLC19A2	1.36924	0.453379	5.80863e-05	0.00166978
AL451050.2	1.36918	0.453317	1.58664e-06	0.000110303
LINC01475	1.36889	0.453008	2.19913e-05	0.000808804
TXNP4	1.3687	0.452811	0.000332774	0.00616956
CA13	1.36855	0.452644	0.000565624	0.00916822
SHOC1	1.36825	0.452327	0.00128251	0.0167458
AC069544.1	1.36821	0.452289	1.30152e-06	9.43257e-05
TROAP	1.36817	0.45225	1.72243e-06	0.000116063
KRT3	1.36814	0.452221	0.00402768	0.0389434
TMEM177	1.36813	0.452203	3.78747e-07	3.70897e-05
RSRC1	1.36791	0.451971	5.09476e-05	0.00151696
TTC6	1.36788	0.451939	8.35969e-05	0.00220492
CENPM	1.36781	0.451864	0.000104554	0.00260819
STK11	1.36771	0.451762	0.000524467	0.00866741
MRPS18B	1.3677	0.45175	1.30619e-07	1.71141e-05
TNFRSF18	1.36762	0.451664	0.0391497	0.188479
KIF20B	1.36755	0.451593	0.000103214	0.00258225
GPT	1.36753	0.45157	0.0168495	0.107304
H2AFY2	1.36751	0.451554	0.0231734	0.132907
HACD3	1.36745	0.451491	3.36495e-05	0.00110928
AC004069.1	1.36744	0.451481	0.000412694	0.00721858
AC010970.1	1.36728	0.451311	0.025881	0.14324
AC079305.1	1.36712	0.451145	0.000612402	0.00976428
GALNT7	1.36703	0.451048	0.0113076	0.0808626
TEX45	1.367	0.451013	2.04467e-05	0.000765932
AL122058.1	1.367	0.45101	0.000363446	0.00658508
WDR90	1.36679	0.450789	7.91149e-05	0.00211659
DHRS4	1.36672	0.450715	1.57438e-07	1.9457e-05
CFDP1	1.36658	0.45057	5.84172e-07	5.15839e-05
PPP4R3A	1.36657	0.450561	1.78263e-07	2.1332e-05
AL133153.2	1.36644	0.450427	5.50039e-07	4.98133e-05
RASAL2	1.36643	0.450413	0.000345034	0.0063204
LMNB1	1.36641	0.450391	0.000114086	0.00278941
RF00017.165	1.36628	0.450249	8.35121e-05	0.00220371
SMARCB1	1.36627	0.450248	1.60667e-08	3.43174e-06
PSMD10P2	1.36622	0.450187	3.60274e-05	0.0011713
DSCC1	1.3662	0.450166	7.59265e-06	0.00035342
AF274858.1	1.36614	0.450108	0.000499691	0.0083383
CDC14A	1.36601	0.449972	0.000579536	0.00934289
RNU7.75P	1.36596	0.449913	0.00335703	0.0340166
IL17RD	1.36589	0.449845	0.0029361	0.0308558
CRYBG3	1.36587	0.449824	0.00973944	0.0729968
C1orf210	1.3658	0.449745	0.0025239	0.0276206
ELF3.AS1	1.36572	0.44966	0.000655991	0.0102826
SIX3	1.36568	0.449618	0.0367661	0.180686
ACSS2	1.36563	0.449562	1.25342e-05	0.000520132
B3GALT5	1.3656	0.449538	0.0393199	0.189009
SNRPB	1.36548	0.449411	1.20678e-08	2.73628e-06
IP6K3	1.36546	0.44939	0.0294853	0.155902
REXO5	1.36542	0.449342	2.35735e-05	0.000850418
AHSA1	1.36541	0.449333	7.06001e-09	1.85005e-06
AC016044.1	1.36514	0.449046	0.00249787	0.0274161
ATP1B3	1.36497	0.448866	0.00535626	0.0476988
RNY4P10	1.36467	0.448557	0.000563117	0.00913282
ACADSB	1.3646	0.448482	0.000347733	0.00635325
UTP25	1.3646	0.448482	3.63062e-07	3.60527e-05
AC008514.1	1.3646	0.448474	0.0109401	0.0791858
MYO19	1.36432	0.448183	5.80971e-07	5.1512e-05
METTL17	1.36404	0.447884	7.80195e-07	6.38159e-05
LINC00884	1.36393	0.447764	0.00281512	0.0299682
ANKRD18A	1.36381	0.447648	5.92504e-05	0.00169721
TAF4	1.36361	0.44743	1.89437e-06	0.000124856
CCNK	1.36355	0.447364	0.000264255	0.00521163
STAG1	1.36354	0.447359	0.00321623	0.0329971
LINC01431	1.36351	0.447325	9.43288e-06	0.000420079
PKN2	1.36342	0.447229	1.12515e-05	0.000480206
AL031963.3	1.3634	0.44721	6.80676e-06	0.000326229
DCXR	1.36336	0.447169	1.81203e-05	0.000700576
TADA1	1.36335	0.447151	2.10788e-06	0.000134817
CCNA2	1.36333	0.447139	6.15648e-05	0.00175551
RALGAPA2	1.36317	0.446966	0.00232892	0.0260568
DBF4B	1.36316	0.44695	2.44747e-06	0.000150578
AC092071.1	1.36314	0.446929	0.000430753	0.0074619
MTBP	1.36296	0.446738	3.2363e-06	0.000186919
WDCP	1.36291	0.446687	2.27912e-07	2.55451e-05
TRMT61B	1.36289	0.446665	7.01456e-06	0.000333691
GDPD2	1.36279	0.446567	0.0217363	0.127257
AL445645.1	1.36261	0.446372	1.14595e-05	0.0004855
BOP1	1.3626	0.446357	3.14322e-05	0.00105523
TUT4	1.36251	0.446263	0.000297742	0.00567986
CBX7	1.36251	0.446263	0.000312284	0.00587825
SLC16A1	1.36251	0.446262	0.0412304	0.195274
IGF2BP3	1.36234	0.446083	0.0450213	0.206792
AP1M2	1.3623	0.446043	3.69787e-05	0.00119331
DDI2	1.36229	0.44603	2.24071e-05	0.000819306
BBC3	1.3622	0.445939	0.000772883	0.0115457
TC2N	1.36218	0.445917	0.01262	0.0874534
HMGN2P41	1.36218	0.445913	0.000821467	0.0120962
RAD21	1.36201	0.445739	4.683e-05	0.00142433
AL512363.1	1.36199	0.445721	0.0262472	0.144435
MANEAL	1.36176	0.445468	0.00605456	0.0521534
PNPO	1.36165	0.445355	1.76856e-05	0.000686583
CHAF1B	1.36165	0.445352	1.22128e-05	0.000509033
GINS3	1.36164	0.445348	6.16235e-06	0.000303042
NSMCE4A	1.36163	0.44533	1.58008e-07	1.94849e-05
ACTR5	1.36145	0.445144	1.51174e-07	1.90811e-05
AL773545.3	1.36134	0.445033	0.0270343	0.147511
NUS1P2	1.36129	0.444979	0.0320626	0.164879
COA6.AS1	1.36122	0.4449	0.000657465	0.0102958
JAG1	1.36113	0.444802	0.0165186	0.105702
AC006449.5	1.36095	0.444613	2.39811e-06	0.000148429
AC034231.1	1.36084	0.444501	0.00202055	0.0235033
KIAA0586	1.3608	0.444453	1.07033e-07	1.45282e-05
YBX1	1.36074	0.444394	1.12923e-08	2.59824e-06
CSPP1	1.36061	0.444256	1.69128e-06	0.000114647
ANK3	1.36056	0.444202	0.000444531	0.0076548
PYGO1	1.36047	0.444104	0.00687161	0.0570136
HILPDA	1.36042	0.444048	0.0102398	0.0757438
TSPAN13	1.36026	0.443884	0.0143056	0.0954145
PUS7	1.36023	0.443851	4.37145e-05	0.00135325
NARS2	1.36001	0.443613	5.40157e-06	0.000275938
SVIL	1.36	0.443611	0.00320624	0.0329185
TSEN2	1.36	0.443606	1.25031e-06	9.16914e-05
GPR19	1.35996	0.443564	0.000861589	0.0125113
SLC9A3R1	1.35993	0.443529	0.00255533	0.0278431
FAM83F	1.35992	0.443527	0.00683516	0.0568195
AC005229.4	1.35983	0.443424	1.5692e-06	0.00010925
AF186192.3	1.35974	0.443336	0.0164519	0.105412
RAB25	1.3597	0.443292	0.000639738	0.0100977
SHISAL2A	1.3597	0.443291	0.000430246	0.00745645
TMEM216	1.35963	0.443209	6.11934e-07	5.33693e-05
EDC4	1.35958	0.443164	0.00112148	0.0151246
HMGN2	1.35939	0.442956	4.64975e-06	0.000244596
SALL4	1.35925	0.442811	0.0266457	0.146044
DCTPP1	1.35916	0.442716	9.77083e-06	0.000431732
AL133367.1	1.35915	0.442701	6.4081e-06	0.00031228
AC011444.1	1.35908	0.442634	2.45285e-07	2.69062e-05
HNRNPF	1.35908	0.442626	3.18806e-07	3.27496e-05
OSR1	1.35906	0.442609	0.0048548	0.0444143
ITPA	1.35891	0.442454	6.73503e-08	1.03311e-05
C5	1.35887	0.442412	0.000394467	0.00697739
FBXL8	1.35876	0.442287	1.47047e-05	0.000594937
AC119403.1	1.35818	0.441678	6.21184e-05	0.00176952
TMCO6	1.35816	0.44165	2.47383e-07	2.70839e-05
ANKEF1	1.3581	0.441595	2.18191e-05	0.000804562
YY1	1.35808	0.441568	2.06675e-09	7.26599e-07
AL049555.1	1.358	0.441479	0.0315762	0.163205
TRMT6	1.35799	0.441476	1.71252e-06	0.00011567
AC008870.5	1.35796	0.441444	0.0133302	0.0907951
CHEK2	1.35778	0.441251	1.44623e-08	3.17286e-06
CBX2	1.35767	0.441128	0.0159267	0.102897
CEP83	1.35764	0.441105	2.29158e-08	4.51944e-06
TICRR	1.35754	0.440996	0.000117302	0.00283377
ARL6IP1	1.35751	0.440958	7.86277e-06	0.000363602
CEP72	1.35739	0.440834	6.80096e-05	0.00189164
AL353194.1	1.35737	0.440817	0.000192456	0.0040784
NOB1	1.35718	0.440615	2.58594e-07	2.78799e-05
CBLN1	1.35698	0.440403	0.00707918	0.0582237
SCIN	1.35694	0.440361	0.0253423	0.1411
AP001462.1	1.35687	0.440281	6.32928e-06	0.000309637
FAM210B	1.35687	0.440279	0.000303861	0.00577153
AL033397.2	1.35684	0.440248	0.000973847	0.0137007
ABCE1	1.35683	0.440244	8.4702e-06	0.000386326
CD3EAP	1.35674	0.440149	2.03169e-06	0.000131079
GNE	1.35657	0.43996	0.0158822	0.102772
TUBGCP3	1.35646	0.439846	3.22624e-06	0.000186529
ARMC6	1.35614	0.439501	2.1636e-08	4.3427e-06
AC006262.3	1.35612	0.43948	0.00104998	0.0144426
AC024257.2	1.3561	0.439463	0.000333575	0.00617956
CALML4	1.35604	0.439405	0.000748289	0.0112856
OPLAH	1.35602	0.439373	0.00201832	0.0234823
MECR	1.35599	0.439349	9.90476e-11	7.00787e-08
LTB4R2	1.35588	0.439227	0.00835143	0.0655446
KAZALD1	1.35587	0.439218	0.0258426	0.143084
C2orf72	1.35586	0.439204	0.0240667	0.136495
FAM184A	1.35584	0.439188	0.000451986	0.00774782
AC004923.1	1.35577	0.439109	0.000478556	0.00806885
NUFIP1	1.3557	0.439036	2.3553e-07	2.61402e-05
CYP4F23P	1.35536	0.43868	0.0176254	0.110544
CEP250	1.35531	0.438624	0.000104328	0.00260368
PRSS45	1.35529	0.438605	0.000264833	0.00521758
AUNIP	1.35524	0.438553	1.11283e-06	8.40967e-05
CDKAL1	1.35513	0.438435	4.65876e-06	0.000244842
HSF4	1.35509	0.438387	0.00153965	0.019188
GPHA2	1.35502	0.438316	0.00970403	0.0728316
NUP35	1.35498	0.438275	2.28383e-08	4.51944e-06
PPTC7	1.35487	0.43815	0.000119191	0.00286961
USP39	1.35474	0.438018	2.96543e-09	9.59139e-07
ARL9	1.35471	0.437985	0.0130469	0.0895022
LRRC58	1.35453	0.43779	0.000132923	0.00311026
CEP68	1.35451	0.437773	5.93572e-05	0.00169941
CKS1BP1	1.35434	0.437593	0.00634014	0.0538189
MLH3	1.35429	0.437538	1.96215e-07	2.26656e-05
AC021028.1	1.35421	0.437453	0.00416326	0.0398123
LRRC40	1.35408	0.437314	4.34218e-05	0.00134672
PNN	1.35408	0.437309	1.58466e-05	0.000633031
LRPPRC	1.35403	0.437258	9.46941e-07	7.41339e-05
PAICS	1.35394	0.437164	6.29655e-05	0.00178466
TTC5	1.35386	0.437075	1.75819e-06	0.000117979
DNAJC19	1.35386	0.437074	2.84745e-07	2.99599e-05
CCDC155	1.35359	0.436795	0.000278162	0.00541049
AC139530.2	1.35318	0.436351	3.79383e-06	0.000211773
C15orf61	1.35315	0.436327	1.80464e-08	3.7832e-06
DSN1	1.35313	0.4363	1.11239e-06	8.40967e-05
AC016888.1	1.35304	0.436206	0.0274091	0.148776
IFT172	1.35299	0.436148	5.66182e-05	0.00164091
RNF220	1.35297	0.436135	8.80165e-13	1.91612e-09
AL118516.1	1.35281	0.435964	0.000255658	0.00508996
BEND3	1.35281	0.435956	7.09825e-06	0.000335372
SPIRE2	1.3528	0.435949	0.0020638	0.0238447
SGF29	1.35277	0.435914	5.99528e-08	9.40076e-06
MYLPF	1.35274	0.435889	0.000459802	0.00783567
IQCB1	1.35261	0.435741	7.94692e-05	0.00212175
ZNF74	1.35245	0.435575	1.35086e-05	0.000554873
MCCC1.AS1	1.35238	0.435497	3.45102e-05	0.00113247
HOXB3	1.35229	0.4354	0.044301	0.204679
AC027228.2	1.35223	0.435335	0.000123998	0.00295642
MAML3	1.35208	0.435183	0.00471158	0.0434553
BRCC3	1.35201	0.435104	4.77115e-05	0.00144415
RFC5	1.35175	0.43483	1.22531e-06	9.06602e-05
CHCHD2P9	1.35175	0.434826	0.00156545	0.0194571
AL133153.1	1.35164	0.434712	1.76336e-06	0.000117979
METAP1D	1.35161	0.434684	1.70896e-05	0.000669879
AC016065.1	1.35151	0.434573	4.4067e-06	0.000234645
AC124283.2	1.35149	0.434555	0.00114435	0.0153745
ALG6	1.35132	0.434374	1.9722e-07	2.27353e-05
NADK2	1.35129	0.434334	5.44043e-06	0.000277173
AC092171.3	1.35125	0.434289	0.000164065	0.00363851
RCCD1	1.35123	0.434275	6.04333e-06	0.00029909
PSTK	1.35121	0.434253	7.52018e-10	3.43599e-07
ALDH6A1	1.3512	0.434238	0.00133821	0.0172974
HIST1H2AG	1.35117	0.434209	0.00217374	0.0248061
VCPKMT	1.35111	0.434142	2.87153e-06	0.000170909
AC025181.2	1.35102	0.434047	0.000455052	0.00778775
YEATS4	1.35097	0.433999	2.62109e-06	0.000159013
FANCM	1.35078	0.433796	6.88378e-07	5.82415e-05
CDC45	1.35053	0.433526	3.80144e-06	0.000211805
MTMR12	1.35036	0.433349	0.000575641	0.00929864
MRTO4	1.35034	0.433319	4.4659e-09	1.30973e-06
TYMS	1.3501	0.43307	5.58825e-05	0.00162621
OSER1.DT	1.35007	0.433037	0.000538004	0.00883181
BYSL	1.35007	0.433031	1.24467e-06	9.16138e-05
WRNIP1	1.34996	0.432919	1.18667e-07	1.57798e-05
URB2	1.34995	0.432904	1.6527e-05	0.000655042
AL139412.1	1.3499	0.432858	0.000156328	0.00351269
DDX55	1.34987	0.432821	6.45208e-07	5.55861e-05
NCOA6	1.34986	0.432814	3.14216e-05	0.00105523
ELMO3	1.34972	0.432661	0.000265048	0.00521817
KRT80	1.34972	0.432657	0.0472583	0.213141
ECH1	1.34971	0.432648	4.11501e-05	0.00129327
UBE3D	1.34963	0.432565	7.24174e-11	5.85352e-08
HMGN4	1.34956	0.432492	0.000927658	0.013216
ZNF566	1.34934	0.432252	2.41293e-05	0.000866926
AC018553.1	1.34921	0.432113	0.00216829	0.0247689
FLVCR1	1.34903	0.431919	2.96295e-05	0.00101151
P4HTM	1.34899	0.431883	0.000453586	0.00777289
OXT	1.34891	0.431791	0.000392724	0.00695525
ERH	1.3489	0.431781	1.50029e-08	3.25361e-06
TMEM251	1.34887	0.431751	2.03538e-05	0.000764477
SNORD88A	1.34876	0.43163	0.000401025	0.00705371
GGA3	1.34869	0.431554	6.52622e-07	5.6047e-05
DGKH	1.34852	0.431382	0.000116102	0.00282165
MTMR9LP	1.34849	0.431346	0.00235549	0.0262503
GEMIN4	1.34836	0.431206	1.56048e-06	0.000108776
AC020765.2	1.34823	0.431069	5.18756e-05	0.00153973
AL158013.1	1.34819	0.431027	2.86603e-05	0.000987961
CLDN4	1.34807	0.4309	0.0279331	0.15065
SLC13A3	1.34807	0.430893	0.00166588	0.0203347
TXLNG	1.34802	0.430843	3.78872e-06	0.000211697
AC131009.3	1.34802	0.430837	0.000245711	0.00493183
ARHGEF26	1.34801	0.430836	0.0210344	0.124578
MCM7	1.34785	0.430665	1.27924e-06	9.31889e-05
ZNF385C	1.34782	0.430625	0.000120288	0.00288865
CDC25A	1.3478	0.43061	3.93013e-05	0.00125029
DAAM1	1.34772	0.430516	0.00135686	0.0174588
DLEU1	1.34759	0.430379	7.63958e-09	1.95528e-06
ZFP69	1.34719	0.429952	4.66263e-08	7.78508e-06
KMT5C	1.34712	0.429883	9.93759e-06	0.000436714
ACVR1B	1.34708	0.429839	0.000122775	0.00293716
HLF	1.34697	0.429719	0.0155882	0.101502
CSPG5	1.34693	0.429677	0.00360741	0.0359547
SYDE2	1.34681	0.429544	0.000115229	0.00280406
AC008755.1	1.34668	0.429408	6.23356e-08	9.71989e-06
GLMN	1.34657	0.429294	2.19693e-07	2.48701e-05
GON7	1.34652	0.42924	1.1341e-06	8.5362e-05
SMAD1	1.34649	0.429204	0.00561461	0.049339
FANCL	1.34636	0.429067	5.5631e-07	5.01405e-05
LCLAT1	1.34631	0.429008	2.93988e-06	0.000174244
ZNF343	1.3463	0.429001	1.11515e-07	1.49927e-05
AC126768.2	1.34623	0.428925	0.0334469	0.169608
RGS9BP	1.34621	0.4289	2.03328e-06	0.000131079
RACGAP1	1.34617	0.428861	1.24739e-05	0.000518685
AL133353.1	1.34609	0.428773	0.00149413	0.0187477
FHDC1	1.34599	0.428669	0.00148078	0.0186255
ORC6	1.34598	0.428659	1.96163e-05	0.000743685
KNOP1	1.34592	0.428594	7.24735e-08	1.09391e-05
CPT2	1.34588	0.428553	9.40157e-07	7.37054e-05
EPM2AIP1	1.34586	0.428533	0.000257031	0.00510661
MTM1	1.34586	0.428529	0.000208883	0.00434516
B3GALNT1	1.34584	0.42851	0.00199448	0.0232575
KNL1	1.34579	0.428456	0.000131801	0.00308783
NEK2	1.34578	0.42844	4.83967e-05	0.00146255
CLTCL1	1.34574	0.428403	0.000617893	0.00982856
HIST1H2AM	1.34566	0.428309	0.00109266	0.0148813
DDB2	1.34557	0.428221	1.47161e-05	0.000594973
SNORD100	1.34549	0.428135	0.00547486	0.0483822
INCENP	1.3454	0.42803	0.00118739	0.0158511
AC090970.2	1.34526	0.427888	0.0014131	0.0179821
SF3B3	1.34525	0.427873	1.34406e-06	9.63549e-05
TGDS	1.34521	0.427832	2.2381e-05	0.000819306
C15orf62	1.34505	0.427657	0.00596599	0.051642
LINC01703	1.34505	0.427657	0.000582224	0.00937193
CDKN3	1.34502	0.427626	1.4858e-05	0.000599423
ARF6	1.34485	0.427445	1.76172e-06	0.000117979
MRPL2	1.34481	0.427398	1.21642e-08	2.7431e-06
SMARCC2	1.34478	0.427372	0.00331872	0.0337126
METAP1	1.34475	0.427334	0.00052974	0.00872906
AC092535.3	1.34446	0.427025	1.3525e-06	9.65449e-05
IRF9	1.34443	0.426999	0.00138466	0.0176918
AC114489.1	1.34436	0.426917	0.00479605	0.0440405
MLLT10	1.34419	0.426733	9.45533e-05	0.00241077
SPHK1	1.34415	0.426692	0.00592646	0.0514335
PRODH	1.34413	0.426676	0.0129923	0.0892028
LSM14B	1.34395	0.426478	2.74306e-05	0.000956954
RNF157.AS1	1.34379	0.426303	0.0227793	0.131299
MTFR1	1.34369	0.426198	4.03385e-06	0.000220816
CBR3	1.3436	0.426098	0.0368655	0.180992
AC104794.2	1.34359	0.426095	0.000375019	0.00674507
AL445231.1	1.34354	0.42604	8.23606e-09	2.05365e-06
AL023803.2	1.34354	0.426035	7.47366e-05	0.00203377
MELTF	1.34344	0.425929	0.0157392	0.102223
POGK	1.34343	0.425924	6.39714e-06	0.00031228
PRKCE	1.34342	0.425913	1.16624e-06	8.70413e-05
DBF4	1.3433	0.425778	9.3237e-07	7.35014e-05
GRHL2	1.34325	0.425726	0.000531578	0.00875426
MEIOB	1.34324	0.425714	6.39566e-07	5.52258e-05
ZBED4	1.34313	0.425596	1.17963e-05	0.000495691
WDTC1	1.34307	0.425534	5.2899e-05	0.00156047
ZDHHC23	1.34301	0.425468	0.00169797	0.0206181
KHDRBS3	1.34293	0.425379	0.00727524	0.0593276
UBIAD1	1.3429	0.425348	1.47512e-07	1.88051e-05
UTP23	1.3427	0.425135	1.46143e-06	0.00010263
AC025048.2	1.34264	0.425074	0.000109481	0.00270487
CCDC115	1.34256	0.424987	3.22102e-07	3.29091e-05
PIGU	1.34253	0.424956	1.3241e-06	9.55951e-05
WDR20	1.34242	0.424832	2.5775e-07	2.78799e-05
NFATC3	1.34241	0.424824	0.000111216	0.00273818
CHAMP1	1.34241	0.424821	0.000218646	0.00449702
AC007255.1	1.34238	0.424798	0.00646184	0.0545982
AP001542.1	1.34223	0.424634	0.014645	0.0970878
PLSCR4	1.34211	0.424505	0.0226266	0.130663
NOC2L	1.34208	0.424475	5.79426e-07	5.1512e-05
AC096887.2	1.34201	0.424394	9.89321e-06	0.000435779
AC131235.3	1.34196	0.42434	1.34873e-06	9.65118e-05
LIN9	1.3419	0.42428	2.99383e-06	0.000176517
DEPDC5	1.34185	0.424227	1.29717e-06	9.42518e-05
SRPK1	1.34182	0.424189	7.02031e-05	0.00193799
GNRHR2	1.34181	0.424185	2.4059e-07	2.6494e-05
SNW1	1.34167	0.424027	5.51224e-09	1.52051e-06
PEX10	1.34165	0.424013	6.41782e-06	0.00031228
AC084809.2	1.34143	0.423769	5.51495e-08	8.86811e-06
BLM	1.34137	0.423711	4.78957e-06	0.000250322
PRXL2A	1.34127	0.423603	0.00243235	0.0268374
OXR1	1.34114	0.423455	0.000483612	0.00812749
RTKN2	1.34085	0.42315	0.00451998	0.0422822
NUP107	1.3407	0.422991	3.55966e-06	0.000201849
MAT2A	1.34063	0.422907	0.0029947	0.0313147
CSNK2A1	1.3406	0.422879	1.82504e-06	0.0001209
CYP2F1	1.34058	0.422861	0.000891905	0.0128204
AC062037.2	1.34056	0.422837	0.00546537	0.048321
ACO2	1.34052	0.422794	0.000771147	0.0115259
MKKS	1.34044	0.422709	5.17731e-08	8.42087e-06
PCIF1	1.34031	0.422571	1.43024e-07	1.83155e-05
TMEM69	1.3401	0.422343	9.42556e-08	1.31405e-05
AC073389.3	1.34007	0.422309	1.88166e-05	0.000721096
DDX12P	1.33989	0.422119	0.00172503	0.0208543
BPHL	1.33965	0.421858	3.4513e-05	0.00113247
AL118558.3	1.33962	0.421826	2.94214e-05	0.00100745
DONSON	1.33959	0.421788	9.90232e-06	0.000435841
[truncated: 10,825 more rows]

## Sheet: CHOL
Differentially expressed genes (DEGs) between the low-HPDL subgroup and the high-HPDL subgroup in CHOL
RPS4Y1	31.3155	4.9688	0.00406721	0.82423
IGKV4.1	12.0591	3.59205	0.039694	0.898868
IGKC	11.107	3.4734	0.028883	0.898868
IGLC3	11.0124	3.46105	0.00945948	0.898868
IGHG1	10.7046	3.42016	0.04343	0.898868
MSLN	9.8629	3.30201	0.0191685	0.898868
EVPL	9.57022	3.25855	0.00397411	0.82423
IGLV3.19	9.31957	3.22026	0.020331	0.898868
IGHG3	8.99142	3.16855	0.0259809	0.898868
ADH1C	8.57928	3.10086	0.03042	0.898868
IGLC2	8.55045	3.096	0.0362486	0.898868
IGKV3.11	8.06817	3.01224	0.043664	0.898868
PRAME	7.20611	2.84922	0.00334882	0.82423
DDX3Y	7.19372	2.84674	0.00316814	0.82423
KRT17	6.75267	2.75546	0.0312889	0.898868
SLC5A1	6.71656	2.74772	0.00372102	0.82423
PI3	6.69179	2.74239	0.049555	0.898868
JCHAIN	6.26521	2.64736	0.034421	0.898868
AQP5	6.21969	2.63684	0.0252008	0.898868
ACKR1	6.0892	2.60625	0.00954445	0.898868
AP005233.2	6.06368	2.60019	0.0188997	0.898868
MUC5B	5.88011	2.55584	0.00840242	0.888939
SPDEF	5.80784	2.538	0.00323949	0.82423
CD79A	5.72805	2.51804	0.0197253	0.898868
IGLV1.44	5.70693	2.51272	0.04808	0.898868
GGT6	5.6765	2.505	0.0208679	0.898868
C19orf33	5.54609	2.47147	0.0377293	0.898868
TFF3	5.5088	2.46174	0.0315535	0.898868
IGHV4.34	5.47839	2.45375	0.0490984	0.898868
KDM5D	5.46706	2.45077	0.00466708	0.835341
EIF1AY	5.46673	2.45068	0.00599166	0.856111
IGLV1.51	5.46588	2.45045	0.0378844	0.898868
ALDH3B2	5.45052	2.44639	0.00768659	0.878942
MIR8071.2	5.31656	2.41049	0.012655	0.898868
TXLNGY	5.273	2.39862	0.00375211	0.82423
HOXA10	5.25862	2.39468	0.00105231	0.82423
RBP1	5.19269	2.37648	0.00092419	0.82423
CXCL1	5.11724	2.35537	0.0383614	0.898868
PTGDS	4.98753	2.31833	0.0217217	0.898868
MYEOV	4.87437	2.28522	0.0369675	0.898868
IGLV4.69	4.73387	2.24302	0.0492554	0.898868
FXYD3	4.70813	2.23515	0.0323376	0.898868
PROM2	4.69803	2.23206	0.0211873	0.898868
MUC1	4.66422	2.22163	0.0249352	0.898868
PKP3	4.62164	2.20841	0.0482822	0.898868
IGLL5	4.60617	2.20357	0.0443706	0.898868
TMPRSS3	4.46034	2.15716	0.00988589	0.898868
IGHV3.33	4.45473	2.15534	0.0492604	0.898868
IGHV3.66	4.3978	2.13678	0.0413874	0.898868
GSTP1	4.36253	2.12517	0.0375487	0.898868
ANKRD65	4.36106	2.12468	0.00333575	0.82423
CXCL13	4.30024	2.10442	0.040979	0.898868
CHI3L1	4.28159	2.09815	0.0123222	0.898868
MZB1	4.2285	2.08014	0.025671	0.898868
HPDL	4.16514	2.05836	6.75609e-09	0.000382408
GPRC5A	4.14308	2.05071	0.0288525	0.898868
PPP1R14D	4.12156	2.04319	0.0220428	0.898868
IGHV1.3	4.11618	2.04131	0.0338449	0.898868
TMPRSS13	4.08279	2.02956	0.00758238	0.878942
SCNN1A	4.03157	2.01134	0.048281	0.898868
MIR200CHG	4.02122	2.00763	0.0208233	0.898868
IGKJ5	3.96709	1.98808	0.0220529	0.898868
USP9Y	3.88276	1.95708	0.00454051	0.835341
SLC39A4	3.81734	1.93257	0.00572515	0.856111
IGHV2.70	3.8108	1.93009	0.0487727	0.898868
DPEP1	3.79945	1.92579	0.0347234	0.898868
RARRES1	3.78629	1.92078	0.0277475	0.898868
EPHB3	3.74337	1.90434	0.0206124	0.898868
HOXA3	3.73172	1.89984	0.00139931	0.82423
DACT2	3.72549	1.89743	0.0492363	0.898868
AC106900.1	3.70274	1.88859	0.016809	0.898868
AGR3	3.59472	1.84588	0.0156538	0.898868
JSRP1	3.56758	1.83494	0.0448069	0.898868
PLEKHS1	3.55271	1.82892	0.029649	0.898868
STRA6	3.55143	1.8284	0.0380909	0.898868
UTY	3.5354	1.82187	0.00259097	0.82423
PRKY	3.52414	1.81727	0.0022453	0.82423
IL20RA	3.47177	1.79567	0.014356	0.898868
ZFY	3.4473	1.78547	0.00384257	0.82423
ETV4	3.44102	1.78284	0.0209346	0.898868
IGSF9	3.42921	1.77788	0.00733235	0.878942
AOC1	3.37601	1.75532	0.0451312	0.898868
CXCL3	3.33663	1.73839	0.0214465	0.898868
TRIM29	3.32128	1.73174	0.0173239	0.898868
RBBP8NL	3.31367	1.72843	0.00286268	0.82423
MME	3.30967	1.72669	0.0498353	0.898868
IGLV9.49	3.30454	1.72445	0.0480351	0.898868
TSPAN7	3.29337	1.71956	0.0140959	0.898868
SELP	3.28527	1.71601	0.011224	0.898868
TNFRSF13C	3.28432	1.71559	0.00163103	0.82423
FUT2	3.25507	1.70269	0.0108749	0.898868
UGT8	3.24399	1.69777	0.0311818	0.898868
C9orf152	3.22015	1.68713	0.0474307	0.898868
WNT5B	3.20437	1.68004	0.0307443	0.898868
DPT	3.19841	1.67735	0.0368319	0.898868
PDX1	3.19589	1.67622	0.0437483	0.898868
CENPV	3.14959	1.65516	0.0242992	0.898868
TMEM97	3.14257	1.65195	0.00283674	0.82423
ARID5B	3.1221	1.64252	0.00350086	0.82423
AC141557.1	3.12082	1.64193	0.031391	0.898868
CDCA7	3.10919	1.63654	0.036434	0.898868
CDC20	3.10305	1.63369	0.00199861	0.82423
TMEM125	3.09287	1.62894	0.0104829	0.898868
TSPAN13	3.08677	1.6261	0.0217422	0.898868
CYP4X1	3.0807	1.62326	0.0448816	0.898868
GSDMB	3.07212	1.61924	0.000877252	0.82423
LINC00885	3.0699	1.61819	0.00527407	0.845806
SP5	3.06556	1.61615	0.0365038	0.898868
NXN	3.02776	1.59825	0.0117956	0.898868
ADD3	3.01204	1.59074	0.00791492	0.884677
CABP4	2.9944	1.58227	0.011589	0.898868
PRR15L	2.96946	1.5702	0.0135387	0.898868
AL138930.1	2.93366	1.5527	0.0401099	0.898868
TTTY14	2.93017	1.55098	0.00535856	0.845806
KLF5	2.92932	1.55057	0.0384285	0.898868
MFSD6L	2.92439	1.54814	0.0376525	0.898868
TMEM139	2.92057	1.54625	0.000415028	0.65254
IGKV1.8	2.92051	1.54622	0.0356636	0.898868
TMSB4Y	2.90502	1.53855	0.00615174	0.859208
MAPK15	2.892	1.53207	0.0335941	0.898868
POU2AF1	2.87593	1.52403	0.0137532	0.898868
CLDN4	2.86014	1.51609	0.0371864	0.898868
LFNG	2.83277	1.50221	0.00459959	0.835341
MNX1.AS1	2.82146	1.49644	0.0194206	0.898868
SCARA5	2.80561	1.48832	0.012172	0.898868
AC009065.5	2.78842	1.47945	0.00394775	0.82423
EPHX3	2.78146	1.47584	0.0424588	0.898868
PANTR1	2.77419	1.47207	0.0396652	0.898868
CCL22	2.77097	1.47039	0.0154822	0.898868
RAPGEFL1	2.75785	1.46354	0.00295788	0.82423
AL008723.2	2.75742	1.46332	0.00413461	0.82423
BIK	2.75585	1.4625	0.0400125	0.898868
RNF43	2.75504	1.46207	0.0101988	0.898868
ST6GALNAC1	2.74982	1.45934	0.0252096	0.898868
B3GALT5	2.73281	1.45039	0.0291569	0.898868
LINC01833	2.72856	1.44814	0.0489905	0.898868
MARCKSL1	2.72245	1.44491	0.0100424	0.898868
AL627309.6	2.71459	1.44074	0.0155041	0.898868
AL627309.7	2.70828	1.43738	0.0349345	0.898868
DES	2.68537	1.42512	0.0203959	0.898868
IGKV1.33	2.67617	1.42017	0.0446652	0.898868
CDX2	2.66425	1.41373	0.0412276	0.898868
IQANK1	2.64669	1.40419	0.00793744	0.884677
AC011297.1	2.64076	1.40095	0.0392245	0.898868
SEMA3D	2.6257	1.3927	0.0483031	0.898868
LYPD3	2.61703	1.38793	0.0383317	0.898868
NLGN4Y	2.6143	1.38642	0.00600466	0.856111
AC006329.1	2.60313	1.38025	0.0362172	0.898868
FREM2	2.59328	1.37478	0.0121808	0.898868
UBE2C	2.58933	1.37258	0.00961885	0.898868
DNMT3B	2.57887	1.36674	0.00103604	0.82423
ATAD3C	2.57228	1.36305	0.0147625	0.898868
KRT16	2.55846	1.35527	0.0425809	0.898868
LMO7.AS1	2.55078	1.35094	0.0058311	0.856111
AC009065.2	2.53912	1.34433	0.00489297	0.839877
LRP8	2.53234	1.34047	0.0115344	0.898868
OVOL1	2.52468	1.3361	0.0226015	0.898868
LIPH	2.5089	1.32706	0.0327996	0.898868
CD8B	2.5015	1.32279	0.0259692	0.898868
LHX1.DT	2.49699	1.32019	0.0255364	0.898868
LINC01781	2.48702	1.31442	0.00905683	0.898868
HENMT1	2.48494	1.31321	0.0356245	0.898868
CTSLP1	2.47449	1.30713	0.0052497	0.845806
PLCB4	2.47187	1.3056	0.016621	0.898868
TNFRSF17	2.46353	1.30073	0.0141765	0.898868
ARHGEF19	2.46202	1.29984	0.0257458	0.898868
MYB	2.45638	1.29653	0.00859849	0.898868
SNORA66	2.45007	1.29282	0.00928966	0.898868
ERN2	2.44068	1.28729	0.0331418	0.898868
HOXA.AS2	2.43654	1.28483	0.00539662	0.847545
SPOCK2	2.43065	1.28134	0.0355347	0.898868
CCL17	2.42872	1.2802	0.0431985	0.898868
TPD52L1	2.42682	1.27907	0.0345911	0.898868
FOXP4.AS1	2.42417	1.27749	0.0035158	0.82423
CST7	2.41193	1.27019	0.0494736	0.898868
LMO4	2.40922	1.26857	0.0428203	0.898868
GDPD3	2.40221	1.26436	0.00905986	0.898868
AC025154.2	2.3824	1.25242	0.0321479	0.898868
GPRIN2	2.38066	1.25136	0.0481307	0.898868
DEF6	2.37839	1.24999	0.00545574	0.85286
FCMR	2.37115	1.24559	0.0325876	0.898868
AC009686.2	2.36726	1.24322	0.0180687	0.898868
LZTS3	2.36429	1.24141	0.0286286	0.898868
TRBJ2.2	2.36225	1.24016	0.0487042	0.898868
FAM110A	2.36172	1.23984	0.00246028	0.82423
GJB3	2.35436	1.23533	0.0472908	0.898868
TROAP	2.34935	1.23226	0.00815423	0.884677
CHL1	2.34407	1.22902	0.0357521	0.898868
SEMA4A	2.34254	1.22807	0.0194829	0.898868
AP002360.3	2.33426	1.22296	0.0068884	0.872548
VILL	2.33105	1.22098	0.0331596	0.898868
MIR6859.1	2.32231	1.21556	0.015428	0.898868
BANK1	2.31836	1.21311	0.0124146	0.898868
CLEC2D	2.31469	1.21082	0.000701373	0.82423
MIR4653	2.31337	1.21	0.0380302	0.898868
RNFT2	2.31127	1.20869	0.0211417	0.898868
PLEKHF1	2.31023	1.20804	0.0245454	0.898868
AC124947.2	2.30998	1.20788	0.0292453	0.898868
MYH14	2.30996	1.20787	0.00321273	0.82423
CBX2	2.30115	1.20235	0.0197984	0.898868
MUC4	2.2964	1.19937	0.0167345	0.898868
AURKB	2.28817	1.1942	0.0170423	0.898868
AC006157.1	2.28489	1.19212	0.0219661	0.898868
NYNRIN	2.28282	1.19082	0.0242568	0.898868
CASC8	2.28114	1.18975	0.000277829	0.65254
ARTN	2.27248	1.18427	0.00536455	0.845806
ITGB8	2.26932	1.18226	0.0407323	0.898868
METTL27	2.2686	1.1818	0.0179093	0.898868
LHX1	2.26507	1.17955	0.0319409	0.898868
LINC01006	2.2636	1.17862	0.00410414	0.82423
S1PR4	2.26236	1.17783	0.0177685	0.898868
TNNC1	2.24935	1.16951	0.00888927	0.898868
KIF2C	2.24761	1.16839	0.00590453	0.856111
KIF18B	2.2423	1.16498	0.0104573	0.898868
DOC2B	2.24105	1.16417	0.0402209	0.898868
HOXA5	2.24099	1.16413	0.0430742	0.898868
AP001542.3	2.23714	1.16165	0.000487605	0.704198
HOTAIRM1	2.23592	1.16087	0.00981107	0.898868
DLX3	2.23426	1.1598	0.0200007	0.898868
TSKU	2.23018	1.15716	0.0479758	0.898868
LYPD2	2.22354	1.15286	0.0291105	0.898868
AL118505.1	2.22001	1.15057	0.00981866	0.898868
OAT	2.21568	1.14775	0.0342996	0.898868
NEK2	2.21336	1.14624	0.0282692	0.898868
MACROD1	2.20538	1.14103	0.0435786	0.898868
AC009275.1	2.19941	1.13712	0.0187189	0.898868
ATP2A3	2.19831	1.1364	0.017887	0.898868
GYG2P1	2.19069	1.13139	0.0157196	0.898868
DGKA	2.18969	1.13073	0.0118003	0.898868
MIR659	2.18963	1.13068	0.00343856	0.82423
LINC02014	2.1893	1.13047	0.00664955	0.859208
AC007342.9	2.1889	1.1302	0.0066193	0.859208
AC026471.3	2.18846	1.12992	0.00201684	0.82423
CPSF1P1	2.18494	1.12759	0.00812309	0.884677
MFSD13A	2.18406	1.12701	0.0254754	0.898868
NUF2	2.18329	1.1265	0.0143702	0.898868
CCDC114	2.18281	1.12619	0.0175893	0.898868
HMGB2	2.18118	1.12511	0.00306968	0.82423
ARHGAP39	2.17706	1.12238	0.00125993	0.82423
MYCL	2.17005	1.11773	0.0223289	0.898868
ATP2C2	2.16638	1.11528	0.0176855	0.898868
NUDT4	2.16592	1.11498	0.0210921	0.898868
FAM24B	2.16549	1.11469	0.0110396	0.898868
AL670729.1	2.1626	1.11277	0.0257471	0.898868
TOP2A	2.15894	1.11032	0.0343178	0.898868
PIR	2.15821	1.10983	0.0374788	0.898868
PRSS8	2.15668	1.10881	0.0204309	0.898868
MYBL2	2.15521	1.10783	0.0345422	0.898868
TDRD5	2.15473	1.10751	0.0312598	0.898868
RRN3P1	2.15131	1.10522	0.00767421	0.878942
PIF1	2.15047	1.10465	0.00981708	0.898868
ZP3	2.1497	1.10414	0.00364881	0.82423
AL109918.1	2.146	1.10165	0.00410541	0.82423
AC012236.1	2.14592	1.10159	0.00268556	0.82423
UCP2	2.14301	1.09964	0.0222464	0.898868
ZBED2	2.13374	1.09338	0.00976743	0.898868
AC107294.2	2.13262	1.09263	0.00566579	0.856111
GRHL1	2.13251	1.09255	0.00650726	0.859208
CDCA8	2.13175	1.09204	0.00761695	0.878942
AKR1E2	2.1256	1.08787	0.038825	0.898868
SLC38A5	2.12541	1.08774	0.0433447	0.898868
SNORD60	2.12274	1.08593	0.0046764	0.835341
EPPK1	2.12141	1.08502	0.0160929	0.898868
AC010643.1	2.11829	1.0829	0.00171755	0.82423
AL390719.2	2.11325	1.07946	0.00888826	0.898868
RF00134	2.11038	1.0775	0.0190501	0.898868
BCL11B	2.1099	1.07717	0.0100507	0.898868
SNORD93	2.10654	1.07488	0.0112803	0.898868
MIR4786	2.10632	1.07473	0.00270991	0.82423
CCDC88C	2.1039	1.07306	0.00368961	0.82423
IGHD2.2	2.10336	1.0727	0.0307509	0.898868
AC004975.2	2.1003	1.07059	0.00464528	0.835341
PBX4	2.09892	1.06965	0.00970155	0.898868
PLK1	2.09613	1.06773	0.0129613	0.898868
AP001207.3	2.09417	1.06638	5.15405e-05	0.533632
SAPCD2	2.09403	1.06628	0.0209891	0.898868
PTTG1	2.09168	1.06466	0.0327412	0.898868
CARD14	2.09102	1.06421	0.0189629	0.898868
GPX7	2.0879	1.06205	0.0435944	0.898868
TNRC6C.AS1	2.0845	1.0597	0.0122248	0.898868
TAS2R5	2.0813	1.05748	0.00368005	0.82423
RHBDL1	2.07917	1.05601	0.033952	0.898868
TRIM54	2.07675	1.05433	0.033344	0.898868
RF00410.2	2.07609	1.05387	0.00580727	0.856111
ACSF2	2.07108	1.05039	0.0140544	0.898868
OR7E38P	2.0682	1.04837	0.0290062	0.898868
AC091153.3	2.06736	1.04779	0.00648003	0.859208
AC023034.2	2.06222	1.0442	0.00881664	0.898868
IGHV3.63	2.05907	1.04199	0.0255767	0.898868
SNORA26	2.05784	1.04113	0.0186846	0.898868
PLEKHG6	2.05697	1.04052	0.0123306	0.898868
PTPN20	2.05225	1.03721	0.0206575	0.898868
MIR3942	2.05129	1.03653	0.0126534	0.898868
GTSE1	2.04609	1.03287	0.0177945	0.898868
MANSC1	2.03951	1.02822	0.0351805	0.898868
RTKN2	2.03853	1.02753	0.00373203	0.82423
TNF	2.03722	1.0266	0.044465	0.898868
CUZD1	2.03683	1.02632	0.00304174	0.82423
AL354892.2	2.03665	1.0262	0.0173391	0.898868
SNHG19	2.03467	1.02479	0.00786974	0.884677
HID1	2.02649	1.01898	0.0250413	0.898868
AL031275.1	2.02644	1.01894	0.0338475	0.898868
MROH6	2.02394	1.01717	0.00540553	0.847545
PRKAR1B	2.01868	1.01341	0.0337039	0.898868
SAMD12	2.01821	1.01308	0.0344822	0.898868
PBX1	2.0172	1.01236	0.0470351	0.898868
GZMM	2.01692	1.01215	0.0324757	0.898868
AC139749.1	2.0121	1.0087	0.00484198	0.839877
DEPDC1	2.00695	1.005	0.0104237	0.898868
METAP1D	2.00675	1.00486	0.0196116	0.898868
AL603750.1	2.00557	1.00401	0.0227585	0.898868
CEP55	2.00388	1.0028	0.0158842	0.898868
AC006042.1	1.99999	0.999996	0.0444676	0.898868
HOXA1	1.99722	0.997992	0.00217216	0.82423
AC105942.1	1.99244	0.994537	0.0356664	0.898868
STEAP4	1.9906	0.993202	0.028115	0.898868
POLQ	1.99004	0.992801	0.0104278	0.898868
RNU6.1048P	1.98969	0.992542	0.0157949	0.898868
BICDL2	1.98941	0.99234	0.0117101	0.898868
TNNC2	1.98832	0.991553	0.048302	0.898868
BOLA2P3	1.98612	0.989954	0.040784	0.898868
TMC8	1.98601	0.989873	0.0359324	0.898868
FAM86HP	1.98423	0.988579	0.000804264	0.82423
BCAS1	1.9841	0.988481	0.0287767	0.898868
BEND5	1.98171	0.986743	0.0196539	0.898868
AC004130.1	1.97932	0.985005	0.00721925	0.878942
AC020907.1	1.9764	0.982878	0.0444213	0.898868
HOXA2	1.97568	0.982348	0.00169023	0.82423
MIR6859.4	1.9748	0.981708	0.00973516	0.898868
BEND3P1	1.97393	0.981071	0.0252003	0.898868
AL355353.1	1.97365	0.980868	0.013473	0.898868
POLR2KP1	1.97243	0.979975	0.0100502	0.898868
AP001628.1	1.97185	0.97955	0.0291869	0.898868
AC010186.3	1.97133	0.97917	0.000538741	0.704198
VEGFD	1.96702	0.976012	0.0118253	0.898868
DLGAP1.AS2	1.96395	0.973757	0.0120136	0.898868
SELE	1.96337	0.973334	0.0309154	0.898868
CDCA3	1.96161	0.972039	0.0172114	0.898868
ANKRD13B	1.95979	0.970699	0.0429669	0.898868
AC017104.1	1.9597	0.970635	0.0158732	0.898868
CENPA	1.95849	0.96974	0.0225516	0.898868
RF00156.3	1.95759	0.969079	0.00177185	0.82423
CAPN9	1.957	0.968646	0.0351328	0.898868
BCL2L14	1.95615	0.968019	0.00829789	0.887075
FUT1	1.95345	0.966025	0.0046801	0.835341
GOLGA8A	1.95341	0.965994	0.0294076	0.898868
FABP5	1.95213	0.965047	0.0386964	0.898868
AC005899.6	1.94994	0.963429	0.0108818	0.898868
BMX	1.948	0.961996	0.00796891	0.884677
PIMREG	1.94792	0.961935	0.0314747	0.898868
PSRC1	1.94373	0.95883	0.0130146	0.898868
USP54	1.94046	0.956398	0.00174071	0.82423
TICRR	1.93869	0.955083	0.00371609	0.82423
FLVCR1.DT	1.93739	0.954117	0.032456	0.898868
AL589765.6	1.93707	0.953875	0.0211589	0.898868
AC099568.2	1.93189	0.950013	0.0133723	0.898868
NTHL1	1.9312	0.949495	0.00210053	0.82423
GGTLC1	1.9296	0.948302	0.043896	0.898868
CD38	1.92856	0.947527	0.0281358	0.898868
PRDX1	1.92843	0.947426	0.00429886	0.835341
DOC2GP	1.92753	0.946752	0.00676953	0.864941
IGLJ2	1.92639	0.945898	0.0317956	0.898868
RPIA	1.92477	0.944688	0.020008	0.898868
RNU5B.2P	1.92433	0.944355	0.0169657	0.898868
MUTYH	1.9238	0.943958	0.0044066	0.835341
AC004870.2	1.92326	0.943553	0.0138959	0.898868
HJURP	1.9194	0.940653	0.0394881	0.898868
CD320	1.91787	0.939508	0.00620692	0.859208
RANGRF	1.91767	0.939352	0.00477351	0.839347
NABP1	1.91701	0.938858	0.00657466	0.859208
AL391244.1	1.91254	0.935487	0.00974696	0.898868
TIGIT	1.91226	0.935276	0.0465095	0.898868
VPS9D1.AS1	1.91155	0.934744	0.00915758	0.898868
DAPP1	1.91065	0.934065	0.0467974	0.898868
SNORA33	1.90897	0.932791	0.0172866	0.898868
HS6ST1	1.90886	0.932709	0.00889509	0.898868
AL355488.1	1.90808	0.932123	0.0224917	0.898868
SLC26A6	1.90247	0.927873	0.00469728	0.835341
RAD54L	1.89501	0.922203	0.00954696	0.898868
C20orf27	1.89471	0.921975	0.00478792	0.839347
DLX4	1.89149	0.919526	0.0131359	0.898868
FGF18	1.89016	0.918511	0.00947682	0.898868
CLLU1OS	1.88691	0.916029	0.0323217	0.898868
CMTM2	1.88651	0.915722	0.00105312	0.82423
WNT6	1.88484	0.91444	0.0335375	0.898868
FAM83A.AS1	1.88275	0.912839	0.0218175	0.898868
CBR3	1.88193	0.912214	0.0418026	0.898868
AC010186.2	1.87994	0.910684	0.00199659	0.82423
RNU6.1136P	1.87947	0.910323	0.0281511	0.898868
AC080013.3	1.87944	0.910299	0.00170604	0.82423
AC107294.3	1.87835	0.909465	0.0112517	0.898868
AC013410.2	1.87787	0.909095	0.0491997	0.898868
SKP2	1.8762	0.90781	0.00978887	0.898868
NCCRP1	1.87615	0.907774	0.0374166	0.898868
AC005534.2	1.87407	0.906178	0.00321418	0.82423
AC015818.3	1.8729	0.905276	0.0215874	0.898868
AP000553.2	1.87225	0.90477	0.0146206	0.898868
KAZALD1	1.87143	0.904141	0.0391337	0.898868
PIK3C2B	1.86975	0.902845	0.00338173	0.82423
BLM	1.86895	0.90223	0.0102272	0.898868
MIR4539	1.86747	0.901084	0.0353178	0.898868
CACNB1	1.86701	0.900728	0.00506776	0.840611
KIFC1	1.86647	0.900309	0.0252417	0.898868
SSX2IP	1.86521	0.899338	0.0246821	0.898868
SNHG26	1.86422	0.898569	0.00512062	0.840611
MLLT6	1.86131	0.896322	0.012127	0.898868
SNORD69	1.85966	0.895039	0.0152049	0.898868
LINC00926	1.85948	0.894898	0.0136373	0.898868
MCTP1	1.85467	0.891163	0.0196572	0.898868
FAM83D	1.85345	0.890215	0.0171545	0.898868
AC104041.1	1.852	0.889086	0.0477607	0.898868
EMID1	1.84987	0.887426	0.00497341	0.839877
SCX	1.84986	0.887418	0.0446613	0.898868
RARG	1.84901	0.886749	0.0408885	0.898868
ADIRF.AS1	1.84892	0.886686	0.00790504	0.884677
IL24	1.84845	0.886317	0.0241085	0.898868
AC022075.1	1.84796	0.885931	0.0455087	0.898868
AC004918.1	1.84609	0.884472	0.0137826	0.898868
P2RX1	1.84545	0.883976	0.005289	0.845806
AC010889.1	1.84072	0.880267	0.0241144	0.898868
AC003665.1	1.83975	0.879512	0.0160267	0.898868
KCNQ4	1.83757	0.877798	0.00575014	0.856111
LIMK2	1.83709	0.877419	0.0222145	0.898868
AL133215.2	1.83424	0.875183	0.000405056	0.65254
ZNF783	1.83421	0.875161	0.00768356	0.878942
RN7SKP80	1.8335	0.874604	0.0254245	0.898868
AC009977.1	1.83333	0.874467	0.0297319	0.898868
RDM1	1.83218	0.873563	0.0229249	0.898868
RECQL4	1.8321	0.8735	0.0309497	0.898868
LHX6	1.831	0.872635	0.00741297	0.878942
ADCY4	1.83034	0.872108	0.0393616	0.898868
AL031186.1	1.82866	0.870783	0.0208654	0.898868
AC084824.5	1.82737	0.869765	0.00286357	0.82423
KLK14	1.82456	0.86755	0.00669224	0.859208
AC005726.3	1.82424	0.867293	0.0189495	0.898868
AC108134.3	1.82206	0.865574	0.0441073	0.898868
AL603839.3	1.82044	0.864288	0.0192959	0.898868
C10orf95	1.81868	0.862888	0.00524539	0.845806
TWNK	1.81823	0.862535	0.0145053	0.898868
AC073585.1	1.81772	0.862129	0.0105174	0.898868
ARMH1	1.81715	0.861678	0.0182615	0.898868
DNALI1	1.81575	0.860569	0.0459551	0.898868
AC015712.6	1.81509	0.860044	0.0156002	0.898868
NT5DC2	1.81409	0.859244	0.0144366	0.898868
KIF23	1.81262	0.85808	0.0331285	0.898868
EVPLL	1.80971	0.855762	0.0391224	0.898868
RF00599	1.80831	0.854642	0.0150542	0.898868
AP003419.3	1.80807	0.854449	0.0464005	0.898868
LINC02568	1.80559	0.852474	0.0169556	0.898868
SFTPA2	1.80452	0.851614	0.0418963	0.898868
MIR6832	1.80306	0.850446	0.0341895	0.898868
ADAT2	1.80133	0.849059	0.0107795	0.898868
CYP4F24P	1.80102	0.848812	0.0126325	0.898868
RNU6.850P	1.80058	0.848459	0.0407141	0.898868
AC005682.1	1.7997	0.847755	0.014816	0.898868
TGM1	1.79867	0.846929	0.0295647	0.898868
APOL4	1.7986	0.846876	0.0427886	0.898868
IGHV3.42	1.79825	0.84659	0.0387187	0.898868
PGM5	1.79808	0.846455	0.0227474	0.898868
GPR19	1.79805	0.846429	0.0267597	0.898868
MIR148A	1.79788	0.846294	0.0315459	0.898868
KLF2	1.79703	0.845613	0.0397318	0.898868
BYSL	1.79653	0.845211	0.0473968	0.898868
AC108860.2	1.79573	0.844568	0.00631795	0.859208
ZFY.AS1	1.79512	0.844081	0.00229492	0.82423
ANLN	1.79452	0.843597	0.0348904	0.898868
HIST3H2A	1.79353	0.842799	0.0284549	0.898868
AL392172.1	1.79295	0.842334	0.0227241	0.898868
AC003070.1	1.79273	0.84216	0.0371401	0.898868
AC079907.1	1.79207	0.841623	0.00156475	0.82423
CHODL	1.78656	0.837184	0.0198232	0.898868
AC027020.2	1.78493	0.835865	0.0192607	0.898868
UBE2FP3	1.78478	0.835743	0.0260355	0.898868
FTLP12	1.78432	0.835371	0.0147477	0.898868
AC138028.6	1.78334	0.834585	0.0392838	0.898868
DDX11	1.78305	0.834344	0.0157877	0.898868
ZNF750	1.78241	0.833828	0.0486584	0.898868
TFAP4	1.78194	0.833451	0.00224119	0.82423
HASPIN	1.78112	0.832787	0.00383274	0.82423
FCRL5	1.78094	0.832636	0.0261929	0.898868
AC002511.2	1.77988	0.83178	0.0157535	0.898868
IMPA2	1.77896	0.831038	0.0241243	0.898868
AC092375.2	1.7768	0.829278	0.00201552	0.82423
CTSV	1.77676	0.829248	0.0365695	0.898868
HMGA1	1.77414	0.827122	0.0315788	0.898868
SKAP2	1.77254	0.825814	0.0369783	0.898868
C11orf80	1.77241	0.825714	0.0251693	0.898868
TBC1D3L	1.77173	0.825156	0.0424316	0.898868
LINC00668	1.77142	0.824907	0.0485477	0.898868
CRYBB3	1.76837	0.82242	0.0270043	0.898868
AF064860.2	1.76811	0.82221	0.00250304	0.82423
AC016737.1	1.76794	0.822069	0.009404	0.898868
MIR1285.1	1.76772	0.821888	0.0327733	0.898868
AC008592.3	1.76727	0.821521	0.0226833	0.898868
AC004080.2	1.76671	0.821067	0.0341864	0.898868
MAD2L1	1.76438	0.819165	0.0198504	0.898868
ARL4A	1.76418	0.819	0.0434469	0.898868
ICAM3	1.76355	0.818479	0.032968	0.898868
AC131009.3	1.76348	0.818425	0.0058895	0.856111
TAS2R6P	1.76123	0.816583	0.010444	0.898868
FAM117A	1.76043	0.815926	0.00655916	0.859208
AC007342.4	1.75978	0.815393	0.0175958	0.898868
TESK2	1.7592	0.81492	0.0267283	0.898868
AL359504.2	1.75814	0.814047	0.0310259	0.898868
AC104463.2	1.75681	0.812962	0.0242873	0.898868
AC004449.1	1.75595	0.81225	0.0406793	0.898868
LINC00672	1.75539	0.811791	0.0221509	0.898868
SSBP3	1.75517	0.811614	0.0295935	0.898868
THEM4	1.75491	0.811394	0.0213891	0.898868
NELL2	1.75441	0.810984	0.00220638	0.82423
MHENCR	1.75377	0.810461	0.00287538	0.82423
ROBO3	1.75352	0.810256	0.0417822	0.898868
LNP1	1.75225	0.80921	0.00272472	0.82423
SIX4	1.75165	0.808716	0.0354133	0.898868
TTC22	1.74975	0.807152	0.0496189	0.898868
SNORA15B.1	1.74882	0.806379	0.00486829	0.839877
MIR1302.3	1.74731	0.805137	0.0327327	0.898868
AL359513.1	1.74692	0.804815	0.00356076	0.82423
AL135910.1	1.74653	0.804492	0.00616914	0.859208
AC005912.1	1.74622	0.804235	0.0174803	0.898868
AC105020.1	1.7456	0.803722	0.00227343	0.82423
ACP6	1.74412	0.8025	0.018156	0.898868
C6orf52	1.74349	0.801982	0.0141536	0.898868
PRR5	1.73976	0.79889	0.00967508	0.898868
ARHGAP8	1.73918	0.798405	0.00304255	0.82423
TFAP2E	1.73817	0.797573	0.00335644	0.82423
AC005014.3	1.73806	0.797479	0.0404246	0.898868
PASK	1.73741	0.796939	0.00778665	0.87972
RNU6.807P	1.73573	0.79554	0.0322744	0.898868
CHEK2	1.73364	0.793802	0.0331264	0.898868
AC007342.5	1.73336	0.793568	0.0234571	0.898868
CCNA2	1.73273	0.793044	0.0375583	0.898868
AP001505.1	1.73241	0.792782	0.0432361	0.898868
PRKCD	1.73002	0.790787	0.00610083	0.859208
AC034229.4	1.72972	0.790538	0.0182217	0.898868
PAQR7	1.72835	0.789396	0.0352382	0.898868
MEST	1.72715	0.788391	0.0392738	0.898868
SNORA63C	1.72615	0.787557	0.00486278	0.839877
AL731566.2	1.72447	0.786152	0.0209412	0.898868
CENPW	1.72247	0.784475	0.0299312	0.898868
NTRK2	1.7214	0.783585	0.0346252	0.898868
AC127024.5	1.71917	0.781714	0.0357435	0.898868
AC246787.1	1.71854	0.781181	0.0140625	0.898868
Z95115.1	1.71525	0.778422	0.0204565	0.898868
SHF	1.71511	0.778298	0.0466715	0.898868
AC068620.2	1.71471	0.777965	0.00100888	0.82423
UHRF1	1.71464	0.777904	0.0314277	0.898868
RSPO3	1.71401	0.777376	0.0336759	0.898868
RNU6.702P	1.71315	0.776654	0.00831806	0.887075
XXYLT1.AS2	1.71106	0.774888	0.00733261	0.878942
AC004865.2	1.70943	0.773518	0.000401624	0.65254
AC016355.1	1.70938	0.773474	0.00568296	0.856111
CENPE	1.70832	0.772578	0.0118726	0.898868
AC092115.3	1.70752	0.771898	0.035392	0.898868
AC104699.1	1.70551	0.770205	0.0290166	0.898868
AC107294.1	1.70467	0.769496	0.00556729	0.856111
IL17RD	1.70407	0.768987	0.0177092	0.898868
LMNB1	1.70325	0.76829	0.0431479	0.898868
LAIR2	1.70249	0.767648	0.0218941	0.898868
C17orf53	1.70232	0.767498	0.02284	0.898868
AC005962.1	1.70175	0.767019	0.00189725	0.82423
PI16	1.69918	0.764842	0.0439507	0.898868
TACC3	1.69534	0.761576	0.0216982	0.898868
SGO1	1.69492	0.761218	0.0227614	0.898868
RPL39L	1.69369	0.760171	0.0479722	0.898868
RNU4.47P	1.69274	0.759357	0.0464129	0.898868
PDCD2L	1.69201	0.758738	0.0105315	0.898868
DLGAP5	1.69158	0.758375	0.0301701	0.898868
AC239803.3	1.68998	0.757006	0.0199196	0.898868
AC005726.1	1.68729	0.754708	0.0117445	0.898868
XRCC2	1.68337	0.751356	0.0204053	0.898868
RNU6.759P	1.68298	0.751019	0.0245238	0.898868
KIF15	1.67963	0.748147	0.00704292	0.875492
SPATA6	1.67963	0.748142	0.0149771	0.898868
FAM110D	1.67892	0.747533	0.0315429	0.898868
AC069499.1	1.67658	0.745525	0.0102325	0.898868
LINC01389	1.67584	0.744881	0.0142609	0.898868
RF00019.240	1.67521	0.744342	0.000953558	0.82423
SNORA80D	1.67415	0.743431	0.00339784	0.82423
AC098487.1	1.67376	0.743092	0.0199692	0.898868
DDIAS	1.67337	0.742761	0.00709958	0.875492
EAF2	1.6733	0.742699	0.011442	0.898868
CCDC163	1.67322	0.742626	0.0178731	0.898868
PGBD1	1.67221	0.741757	0.0492177	0.898868
FAM53A	1.67197	0.741553	0.0184555	0.898868
RHEBL1	1.67169	0.741308	0.0195043	0.898868
AC099489.2	1.67146	0.741106	0.0377593	0.898868
Z69706.1	1.67075	0.740493	0.0283559	0.898868
SAPCD1	1.66962	0.739516	0.0273553	0.898868
LINC00278	1.66869	0.738716	0.017453	0.898868
AC114490.1	1.66732	0.737527	0.0179715	0.898868
TCTEX1D2	1.66652	0.736838	0.0406699	0.898868
LRRC36	1.66515	0.735651	0.0189173	0.898868
ZDHHC20P1	1.66514	0.735644	0.0103753	0.898868
AC010809.2	1.66468	0.735246	0.0235226	0.898868
FLJ45513	1.66426	0.734877	0.0203188	0.898868
CASP2	1.66111	0.732148	0.000316287	0.65254
CIP2A	1.66109	0.732126	0.0260973	0.898868
AC069528.1	1.65907	0.730374	0.000695932	0.82423
PIP5K1B	1.65836	0.729758	0.0468345	0.898868
AC008738.2	1.65779	0.72926	0.0233489	0.898868
PCAT6	1.65776	0.729237	0.0344044	0.898868
TRAV41	1.65589	0.727607	0.0314687	0.898868
AC010719.1	1.65585	0.727573	0.0257419	0.898868
AL023653.1	1.65369	0.725686	0.00365021	0.82423
AC004980.2	1.6521	0.724304	0.0170733	0.898868
AC124319.2	1.65179	0.724031	0.0364458	0.898868
Z93930.3	1.65173	0.723981	0.00575237	0.856111
PKMYT1	1.65167	0.723925	0.0459859	0.898868
THORLNC	1.65131	0.723611	0.0160584	0.898868
LINC00582	1.65123	0.723544	0.0287158	0.898868
AC132008.1	1.65081	0.723172	0.0197315	0.898868
AC010809.1	1.6502	0.722643	0.0463212	0.898868
KIF22	1.64942	0.72196	0.0105168	0.898868
MIR6814	1.64861	0.721252	0.0305916	0.898868
AL117344.1	1.64857	0.721211	0.00808779	0.884677
MIR342	1.64767	0.720423	0.00287965	0.82423
MIR26A2	1.64756	0.720335	0.0205796	0.898868
UBE2S	1.64746	0.72024	0.0344608	0.898868
RHOXF1.AS1	1.64663	0.719514	0.0263464	0.898868
SLC12A9.AS1	1.64496	0.71805	0.0224165	0.898868
C1orf109	1.64453	0.717678	0.0017258	0.82423
AUNIP	1.6443	0.717476	0.0233381	0.898868
KLRG1	1.64361	0.716868	0.0166747	0.898868
AC027449.1	1.6435	0.716768	0.00633872	0.859208
MIR548AT	1.64324	0.716541	0.0304338	0.898868
AP003119.3	1.64256	0.715943	0.038998	0.898868
AC074117.2	1.6422	0.715627	0.00103694	0.82423
CHTF18	1.64117	0.714726	0.0273618	0.898868
AC022400.1	1.6403	0.713958	0.00013804	0.558095
ERICH6.AS1	1.64027	0.713936	0.0236857	0.898868
ALG1L2	1.64013	0.713814	0.00132864	0.82423
PAXIP1.AS1	1.63919	0.712985	0.0141175	0.898868
AL050341.2	1.63893	0.712752	0.00508517	0.840611
AC016773.1	1.63836	0.712252	0.0239587	0.898868
STIL	1.638	0.711932	0.0434967	0.898868
RF00019.411	1.63785	0.711802	0.0126182	0.898868
SH3BP1	1.63739	0.711399	0.0011364	0.82423
XG	1.63591	0.71009	0.0319225	0.898868
AC046185.3	1.63483	0.709144	0.030114	0.898868
FOXD4	1.63333	0.707818	0.0390393	0.898868
LINC00930	1.63293	0.707465	0.0414965	0.898868
EGFL8	1.63261	0.707179	0.0385733	0.898868
SNORA54	1.632	0.706641	0.0207582	0.898868
GPC2	1.63177	0.706437	0.0260895	0.898868
AP001160.1	1.62966	0.704574	0.0129417	0.898868
AC068870.2	1.62859	0.703621	0.0481715	0.898868
AC124947.1	1.62829	0.703361	0.0369366	0.898868
HOXA4	1.62706	0.702267	0.0175324	0.898868
AC093382.1	1.62651	0.701781	0.017908	0.898868
SOX13	1.62644	0.701721	0.0410744	0.898868
BCL2L12	1.62432	0.699836	0.0125519	0.898868
IGLJ1	1.6237	0.699281	0.0278905	0.898868
IGHJ2P	1.622	0.697772	0.0314662	0.898868
AC142472.1	1.62199	0.697767	0.0276175	0.898868
MAGEF1	1.62125	0.69711	0.00701448	0.875492
PPIH	1.62093	0.696819	0.00092139	0.82423
ALG1L8P	1.62004	0.696028	0.00195465	0.82423
AL109741.1	1.61904	0.695143	0.0391387	0.898868
U62317.4	1.61884	0.694962	0.0047339	0.837338
SRI	1.61848	0.694638	0.0361168	0.898868
SELENOW	1.61792	0.694138	0.00378232	0.82423
KLHL32	1.61785	0.694081	0.00278898	0.82423
TRAV8.6	1.61507	0.6916	0.0322743	0.898868
TMEM238	1.61424	0.690859	0.0297261	0.898868
BZW2	1.61417	0.69079	0.0477065	0.898868
GABPB1.AS1	1.61403	0.690669	0.0322556	0.898868
DSCC1	1.61287	0.689628	0.0249105	0.898868
AL356299.2	1.61202	0.68887	0.0310151	0.898868
AL139286.2	1.61173	0.68861	0.014429	0.898868
C16orf89	1.6111	0.688049	0.0203993	0.898868
AL021707.1	1.6111	0.688043	0.00910517	0.898868
Z99129.1	1.61008	0.68713	0.000941557	0.82423
GRAP2	1.60893	0.686106	0.040403	0.898868
TDRKH.AS1	1.60862	0.68582	0.0322396	0.898868
TRAF4	1.60819	0.685438	0.0150755	0.898868
EXOSC3P1	1.60775	0.68504	6.59946e-05	0.533632
CNPY4	1.60725	0.684596	0.0370926	0.898868
TONSL	1.60704	0.684406	0.0412497	0.898868
AC006111.2	1.60621	0.683658	0.0434521	0.898868
BAP1	1.60613	0.683591	0.0412772	0.898868
TRGV10	1.60538	0.682915	0.0497562	0.898868
ARHGAP45	1.60401	0.681687	0.0429507	0.898868
ITM2C	1.60294	0.680722	0.0152005	0.898868
C17orf100	1.60117	0.679129	0.0262575	0.898868
MET	1.60097	0.678949	0.041336	0.898868
AC012313.4	1.60087	0.678853	0.0220456	0.898868
NUP210	1.59978	0.677878	0.0417446	0.898868
MIR222HG	1.59934	0.677475	0.0137166	0.898868
PNOC	1.59912	0.67728	0.0406842	0.898868
MIR1291	1.59788	0.676159	0.0324465	0.898868
AC007000.1	1.59654	0.674947	0.00778454	0.87972
AC079145.1	1.59571	0.674197	0.0420309	0.898868
LINC00426	1.59421	0.672845	0.010391	0.898868
AC007342.8	1.59346	0.672163	0.0474478	0.898868
AP002336.2	1.59249	0.671287	0.00112549	0.82423
RNASET2	1.59151	0.670393	0.0226102	0.898868
PPAT	1.59143	0.670323	0.0322537	0.898868
[truncated: 2,103 more rows]

## Sheet: COAD
Differentially expressed genes (DEGs) between the low-HPDL subgroup and the high-HPDL subgroup in COAD
[truncated: 27,421 more rows]

[truncated: 27 more sheets: DLBC, ESCA, GBM, HNSC, KICH, KIRC, KIRP, LAML, LGG, LIHC, LUAD, LUSC, MESO, OV, PAAD, PCPG, PRAD, READ, SARC, SKCM …]
